# Supplementary material for: The Fission Yeast GATA Factor, Gaf1, Modulates Sexual Development via Direct Down-Regulation of ste11+ Expression in Response to Nitrogen Starvation
Source: PubMed Central journal article supplement (PMC3416868; doi:10.1371/journal.pone.0042409), 2012-08-10
Supplement: pone.0042409.s001.pdf [file pone.0042409.s001.pdf]

Table S1. List of the genes up-regulated in unstarved (+N) *gaf1*  $\Delta$  cells (Group -G)

\* 183 genes

| Systematic    | Gene name    | Description (GeneDB)                                         | Description (FunCat2)                                        | Expression ratio<br>( <i>gaf1</i> $\Delta$ , +N) / (WT, +N) |
|---------------|--------------|--------------------------------------------------------------|--------------------------------------------------------------|-------------------------------------------------------------|
| SPAC1F8.02c   |              | sequence orphan                                              | sequence orphan                                              | 456.13                                                      |
| SPAC1F8.03c   | <i>str3</i>  | siderophore-iron transporter Str3                            | siderophore-iron transporter Str3 (PMID 12888492)            | 263.49                                                      |
| SPBC1683.09c  | <i>frp1</i>  | ferric-chelate reductase Frp1                                | ferric-chelate reductase Frp1                                | 238.52                                                      |
| SPBC947.05c   |              | ferric-chelate reductase (predicted)                         |                                                              | 53.02                                                       |
| SPAC4H3.12c   |              | dubious                                                      | sequence orphan                                              | 23.87                                                       |
| SPAC1F7.08    | <i>fio1</i>  | iron transport multicopper oxidase Fio1                      | iron transport multicopper oxidase Fio1                      | 16.51                                                       |
| SPAC1F7.07c   | <i>fip1</i>  | iron permease Fip1                                           | iron permease Fip1                                           | 15.96                                                       |
| SPCC1620.04c  | <i>mug55</i> | Cdc20/Fizzy family WD repeat protein                         | Cdc20/Fizzy family WD repeat protein                         | 12.00                                                       |
| SPBCPT2R1.08c | <i>tlh2</i>  | RecQ type DNA helicase Tlh1                                  |                                                              | 10.69                                                       |
| SPAC4G8.15c   |              |                                                              | dubious                                                      | 8.70                                                        |
| SPBPB21E7.04c |              | S-adenosylmethionine-dependent methyltransferase (predicted) | S-adenosylmethionine-dependent methyltransferase (predicted) | 8.09                                                        |
| SPCC63.13     |              | DNAJ domain protein                                          | DNAJ domain protein                                          | 7.97                                                        |
| SPAC13F5.07c  |              | term=sequence orphan; date=20080121                          | previously annotated as dubious, may not be protein coding   | 7.11                                                        |
| SPAC23G3.03   | <i>sib2</i>  | ornithine N5 monooxygenase (predicted)                       | ornithine N5 monooxygenase (predicted)                       | 6.79                                                        |
| SPBCPT2R1.06c |              | pseudogene                                                   |                                                              | 5.62                                                        |
| SPCC576.16c   | <i>wtf22</i> | wtf element Wtf22                                            |                                                              | 5.33                                                        |
| SPBC23G7.10c  |              | NADH-dependent flavin oxidoreductase (predicted)             |                                                              | 5.10                                                        |
| SPBPB21E7.05  |              | sequence orphan                                              | sequence orphan                                              | 4.94                                                        |
| SPBC839.06    | <i>cta3</i>  | P-type ATPase, calcium transporting Cta3                     | P-type ATPase, calcium transporting Cta3                     | 4.70                                                        |
| SPAC8E11.06   |              | sequence orphan                                              | sequence orphan                                              | 4.46                                                        |
| SPAP27G11.08c | <i>meu32</i> | sequence orphan                                              | sequence orphan                                              | 4.42                                                        |
| SPAC212.02    |              | sequence orphan                                              | sequence orphan                                              | 4.41                                                        |
| SPAC29E6.07   |              | sequence orphan                                              | sequence orphan                                              | 4.40                                                        |
| SPBC2F12.09c  | <i>atf21</i> | transcription factor Atf21                                   |                                                              | 4.39                                                        |

|               |              |                                                   |                                                         |      |
|---------------|--------------|---------------------------------------------------|---------------------------------------------------------|------|
| SPAC13D6.01   | <i>pof14</i> | F-box protein Pof14                               | F-box protein Pof14                                     | 4.28 |
| SPBC106.02c   | <i>srx1</i>  | sulfiredoxin                                      | sulphiredoxin (PMID 15824112)                           | 4.27 |
| SPAPB17E12.09 |              | sequence orphan                                   | sequence orphan                                         | 4.15 |
| SPAC1F8.01    | <i>ght3</i>  | hexose transporter Ght3                           | hexose transporter Ght3 (PMID 10735857)                 | 4.07 |
| SPAC27D7.03c  | <i>mei2</i>  | RNA-binding protein involved in meiosis Mei2      | RNA-binding protein involved in meiosis Mei2            | 4.07 |
| SPCC757.02c   |              | epimarase (predicted)                             | epimarase (predicted)                                   | 4.03 |
| SPAC212.06c   |              | pseudogene                                        | pseudogene                                              | 3.91 |
| SPCC191.10    |              | sequence orphan                                   | sequence orphan                                         | 3.80 |
| SPAC4F10.17   |              | conserved fungal protein                          | conserved fungal protein                                | 3.74 |
| SPAC1002.21   |              | sequence orphan                                   | sequence orphan                                         | 3.67 |
| SPBC359.05    | <i>abc3</i>  | ABC transporter Abc3                              | ABC transporter Abc3                                    | 3.60 |
| SPAC1002.06c  | <i>bqt2</i>  | bouquet formation protein Bqt2                    | bouquet formation protein Bqt2                          | 3.55 |
| SPCC1393.10   | <i>ctr4</i>  | copper transporter complex subunit Ctr4           | copper transporter complex subunit Ctr4 (PMID 11274192) | 3.53 |
| SPAC8C9.12c   |              | iron ion transporter (predicted)                  | iron ion transporter (predicted)                        | 3.48 |
| SPBP4G3.03    |              | PI31 proteasome regulator related                 |                                                         | 3.32 |
| SPAC1A6.11    |              | dubious                                           | dubious                                                 | 3.29 |
| SPCC737.04    |              | <i>S. pombe</i> specific UPF0300 family protein 6 | <i>S. pombe</i> specific UPF0300 family protein 6       | 3.14 |
| SPAC22F8.03c  |              | sequence orphan                                   | sequence orphan                                         | 3.12 |
| SPCC1020.03   |              | mitochondrial iron ion transporter                | mitochondrial iron ion transporter                      | 2.99 |
| SPCC330.03c   |              | NADPH-hemoprotein reductase                       | NADPH-hemoprotein reductase                             | 2.97 |
| SPBC1348.14c  | <i>ght7</i>  | hexose transporter Ght7                           | hexose transporter Ght7                                 | 2.81 |
| SPBC887.16    |              | dubious                                           |                                                         | 2.80 |
| SPBC1198.12   | <i>mfr1</i>  | fizzy-related protein Mfr1                        |                                                         | 2.79 |
| SPAC23G3.02c  | <i>sib1</i>  | ferrichrome synthetase Sib1                       | ferrichrome synthetase Sib1                             | 2.79 |
| SPBC27B12.03c |              | lathosterol oxidase (predicted)                   |                                                         | 2.76 |
| SPAC15E1.07c  | <i>moa1</i>  | meiotic cohesin complex associated protein Moa1   | meiotic cohesin complex associated protein Moa1         | 2.75 |
| SPAC869.05c   |              | sulfate transporter (predicted)                   | sulfate transporter (predicted)                         | 2.72 |
| SPBC1711.14   | <i>rec15</i> | meiotic recombination protein Rec15               |                                                         | 2.69 |
| SPBC32H8.06   | <i>mug93</i> | TPR repeat protein, meiotically spliced           |                                                         | 2.64 |
| SPAC186.02c   |              | hydroxyacid dehydrogenase (predicted)             | hydroxyacid dehydrogenase (predicted)                   | 2.59 |
| SPAC9E9.17c   |              | dubious                                           | dubious                                                 | 2.50 |
| SPBC12C2.14c  |              | dubious                                           |                                                         | 2.45 |

|               |               |                                                           |                                                           |      |
|---------------|---------------|-----------------------------------------------------------|-----------------------------------------------------------|------|
| SPBC16E9.01c  | <i>php4</i>   | CCAAT-binding factor complex subunit<br>Php4              |                                                           | 2.45 |
| SPAC323.07c   |               | MatE family transporter                                   | MatE family transporter                                   | 2.43 |
| SPBC4F6.09    | <i>str1</i>   | siderophore-iron transporter Str1                         |                                                           | 2.42 |
| SPAC343.07    | <i>mug28</i>  | RNA-binding protein Mug28                                 | RNA-binding protein Mug28                                 | 2.41 |
| SPAC186.07c   |               | hydroxyacid dehydrogenase (predicted)                     | hydroxyacid dehydrogenase (predicted)                     | 2.38 |
| SPBC8D2.19    | <i>mde3</i>   | serine/threonine protein kinase Mde3                      |                                                           | 2.37 |
| SPAC1039.09   | <i>isp5</i>   | amino acid permease Isp5                                  | amino acid permease Isp5                                  | 2.37 |
| SPAC212.09c   |               | pseudogene                                                | pseudogene                                                | 2.35 |
| SPAC17A5.11   | <i>rec12</i>  | endonuclease Rec12                                        | endonuclease Rec12                                        | 2.35 |
| SPCC622.21    | <i>wtf12</i>  | wtf element Wtf12                                         | wtf element Wtf12                                         | 2.34 |
| SPCC13B11.02c |               | sequence orphan                                           | sequence orphan                                           | 2.30 |
| SPAC9G1.09    | <i>sid1</i>   | PAK-related kinase Sid1                                   | PAK-related kinase Sid1                                   | 2.27 |
| SPAC32A11.01  | <i>mug8</i>   | conserved fungal protein                                  | conserved fungal protein                                  | 2.27 |
| SPAC869.03c   |               | urea transporter (predicted)                              | urea transporter (predicted)                              | 2.26 |
| SPAC1F8.04c   |               | hydrolase (predicted)                                     | hydrolase (predicted)                                     | 2.21 |
| SPAC212.07c   |               | pseudogene                                                | pseudogene                                                | 2.21 |
| SPCC1442.11c  |               | sequence orphan                                           | sequence orphan                                           | 2.20 |
| SPBC887.17    |               | uracil permease (predicted)                               |                                                           | 2.20 |
| SPCC548.02c   | <i>wtf3</i>   | wtf element Wtf3                                          | wtf element Wtf3                                          | 2.19 |
| SPAC1002.16c  |               | nicotinic acid plasma membrane<br>transporter (predicted) | nicotinic acid plasma membrane<br>transporter (predicted) | 2.18 |
| SPAC977.13c   |               | hydrolase                                                 |                                                           | 2.18 |
| SPBC428.07    | <i>meu6</i>   | meiotic chromosome segregation protein<br>Meu6            | meiotic chromosome segregation protein<br>Meu6            | 2.18 |
| SPAC22F8.02c  | <i>pvg5</i>   | PvGal biosynthesis protein Pvg5                           | PvGal biosynthesis protein Pvg5                           | 2.17 |
| SPAC6G10.06   |               | FAD-dependent amino acid oxidase<br>(predicted)           | amino acid oxidase (predicted)                            | 2.16 |
| SPAC5H10.07   |               | sequence orphan                                           | sequence orphan                                           | 2.16 |
| SPAC4G9.07    | <i>mug133</i> | <i>S. pombe</i> specific UPF0300 family protein<br>2      | <i>S. pombe</i> specific UPF0300 family<br>protein 2      | 2.16 |
| SPBPJ4664.01  | <i>dps1</i>   | decaprenyl diphosphate synthase subunit<br>Dps1           |                                                           | 2.16 |
| SPBC1271.06c  | <i>mug96</i>  | sequence orphan                                           | sequence orphan                                           | 2.14 |
| SPCC1223.02   | <i>nmt1</i>   | no message in thiamine Nmt1                               | no message in thiamine Nmt1                               | 2.14 |
| SPBC83.19c    |               | sequence orphan                                           |                                                           | 2.13 |
| SPBC215.04    | <i>git11</i>  | heterotrimeric G protein gamma subunit<br>Git11           |                                                           | 2.11 |

|              |               |                                                                  |                                                          |      |
|--------------|---------------|------------------------------------------------------------------|----------------------------------------------------------|------|
| SPBC1683.12  |               | nicotinic acid plasma membrane transporter (predicted)           | nicotinic acid plasma membrane transporter (predicted)   | 2.05 |
| SPBC23G7.11  |               | DNA-3-methyladenine glycosidase Mag2 (predicted)                 |                                                          | 2.01 |
| SPAC1952.15c | <i>rec24</i>  | meiotic recombination protein Rec24                              | meiotic recombination protein Rec24                      | 2.00 |
| SPAC6B12.16  | <i>meu26</i>  | conserved fungal protein                                         | conserved fungal protein                                 | 1.99 |
| SPBC216.02   | <i>mcp5</i>   | cortical anchoring factor for dynein Mcp5/Num1                   |                                                          | 1.99 |
| SPCC338.02   | <i>mug112</i> | sequence orphan                                                  | sequence orphan                                          | 1.97 |
| SPBPB2B2.18  |               | sequence orphan                                                  |                                                          | 1.97 |
| SPAC750.01   |               | pseudogene                                                       | pseudogene                                               | 1.96 |
| SPCC417.12   |               | carboxylesterase-lipase family (predicted)                       | carboxylesterase-lipase family (predicted)               | 1.95 |
| SPAC31G5.09c | <i>spk1</i>   | MAP kinase Spk1                                                  | MAP kinase Spk1                                          | 1.95 |
| SPCC1183.10  | <i>wtf10</i>  | wtf element Wtf10                                                | wtf element Wtf10                                        | 1.94 |
| SPAC750.07c  |               | S. pombe specific GPI anchored protein family 1                  | S. pombe specific GPI anchored protein family 1          | 1.93 |
| SPAC11D3.17  |               | zf-C2H2 type zinc finger protein                                 | zinc finger protein                                      | 1.93 |
| SPBC16G5.19  |               | sequence orphan                                                  |                                                          | 1.92 |
| SPBPB21E7.07 | <i>aes1</i>   | enhancer of RNA-mediated gene silencing                          | enhancer of RNA-mediated gene silencing (PMID 12034844)  | 1.92 |
| SPAC343.20   |               | sequence orphan                                                  | sequence orphan                                          | 1.91 |
| SPCC1840.12  |               | OPT oligopeptide transporter family                              | OPT oligopeptide transporter family                      | 1.91 |
| SPCC794.03   |               | amino acid permease, unknown 13                                  | amino acid permease, unknown 13                          | 1.91 |
| SPCC622.13c  | <i>tii1</i>   | Tel Two Interacting protein 1                                    | conserved eukaryotic protein                             | 1.91 |
| SPAC24C9.15c | <i>spn5</i>   | septin Spn5                                                      | septin Spn5                                              | 1.91 |
| SPBC1271.07c |               | N-acetyltransferase (predicted)                                  | N-acetyltransferase (predicted)                          | 1.90 |
| SPAC17A2.11  |               | sequence orphan                                                  | sequence orphan                                          | 1.89 |
| SPAC1751.04  |               | sequence orphan                                                  | sequence orphan                                          | 1.86 |
| SPAC227.13c  | <i>isu1</i>   | mitochondrial iron-sulfur cluster assembly scaffold protein Isu1 | iron-sulfur cluster assembly scaffold protein Isu1       | 1.84 |
| SPCC74.09    | <i>mug24</i>  | RNA-binding protein, rrm type                                    | RNA-binding protein                                      | 1.82 |
| SPACUNK4.15  |               | 2',3'-cyclic-nucleotide 3'-phosphodiesterase (predicted)         | 2',3'-cyclic-nucleotide 3'-phosphodiesterase (predicted) | 1.81 |
| SPAP27G11.16 |               | sequence orphan                                                  | sequence orphan                                          | 1.80 |
| SPBC23G7.13c |               | urea transporter (predicted)                                     |                                                          | 1.80 |
| SPAC14C4.08  | <i>mug5</i>   | meiotically upregulated gene Mug5                                | meiotically upregulated gene Mug5                        | 1.80 |

|               |              |                                                                              |                                                     |      |
|---------------|--------------|------------------------------------------------------------------------------|-----------------------------------------------------|------|
| SPAC25G10.04c | <i>rec10</i> | meiotic recombination protein Rec10                                          | meiotic recombination protein Rec10 (PMID 7586030)  | 1.79 |
| SPCC63.03     |              | DNAJ domain protein, DNAJC11 family                                          | DNAJ domain protein, DNAJC11 family                 | 1.79 |
| SPCC61.01c    | <i>str2</i>  | siderophore-iron transporter Str2                                            |                                                     | 1.78 |
| SPAPB18E9.03c |              |                                                                              | dubious                                             | 1.78 |
| SPBC32C12.02  | <i>ste11</i> | transcription factor Ste11                                                   |                                                     | 1.76 |
| SPCC622.12c   |              | NADP-specific glutamate dehydrogenase (predicted)                            | NADP-specific glutamate dehydrogenase (predicted)   | 1.76 |
| SPAPB8E5.08   |              | sequence orphan                                                              | sequence orphan                                     | 1.76 |
| SPBC2G2.17c   |              | beta-glucosidase Psu2 (predicted)                                            |                                                     | 1.74 |
| SPBC359.06    | <i>mug14</i> | adducin                                                                      | adducin                                             | 1.73 |
| SPBC1683.11c  |              | isocitrate lyase                                                             | isocitrate lyase                                    | 1.73 |
| SPAC23D3.12   |              | inorganic phosphate transporter (predicted)                                  | inorganic phosphate transporter (predicted)         | 1.73 |
| SPAC11E3.06   | <i>map1</i>  | MADS-box transcription factor Map1                                           | MADS-box transcription factor Map1                  | 1.72 |
| SPBC19C2.04c  | <i>ubp11</i> | ubiquitin C-terminal hydrolase Ubp11                                         | ubiquitin C-terminal hydrolase Ubp11                | 1.72 |
| SPBPB2B2.08   |              | conserved fungal protein                                                     |                                                     | 1.71 |
| SPBC24C6.06   | <i>gpa1</i>  | G-protein alpha subunit                                                      |                                                     | 1.70 |
| SPAC22F8.04   |              | triose phosphate transporter (predicted)                                     | triose phosphate transporter (predicted)            | 1.69 |
| SPAC1565.04c  | <i>ste4</i>  | adaptor protein Ste4                                                         | adaptor protein Ste4                                | 1.69 |
| SPBC29A10.12  |              | HMG-box variant                                                              |                                                     | 1.69 |
| SPAC15A10.10  | <i>mde6</i>  | Muskelin homolog                                                             | Muskelin homolog                                    | 1.68 |
| SPAC1142.05   | <i>ctr5</i>  | copper transporter complex subunit Ctr5 (predicted)                          | copper transporter complex subunit Ctr5 (predicted) | 1.67 |
| SPBC12C2.03c  |              | FAD binding protein (predicted)                                              |                                                     | 1.66 |
| SPAC26H5.09c  |              | GFO/IDH/MocA family oxidoreductase                                           | GFO/IDH/MocA family oxidoreductase                  | 1.66 |
| SPBC36.02c    |              | spermidine family transporter (predicted)                                    |                                                     | 1.65 |
| SPBC2G2.09c   | <i>crs1</i>  | meiosis specific cyclin Crs1                                                 |                                                     | 1.65 |
| SPAC222.15    | <i>meu13</i> | Tat binding protein 1(TBP-1)-interacting protein (TBPIP) homolog (predicted) |                                                     | 1.64 |
| SPBPJ4664.02  |              | glycoprotein (predicted)                                                     |                                                     | 1.64 |
| SPCPB1C11.01  | <i>amt1</i>  | ammonium transporter Amt1                                                    | ammonium transporter Amt1                           | 1.63 |
| SPCC965.12    |              | dipeptidyl aminopeptidase (predicted)                                        | dipeptidyl aminopeptidase (predicted)               | 1.63 |
| SPAC3F10.10c  | <i>map3</i>  | pheromone M-factor receptor                                                  | pheromone M-factor receptor (PMID 8380233)          | 1.63 |
| SPAC6C3.03c   |              | sequence orphan                                                              | sequence orphan                                     | 1.62 |

|               |              |                                                              |                                                          |      |
|---------------|--------------|--------------------------------------------------------------|----------------------------------------------------------|------|
| SPBC19F8.06c  | <i>meu22</i> | amino acid permease, unknown 11                              |                                                          | 1.62 |
| SPBC660.06    |              | conserved fungal protein                                     | conserved fungal protein                                 | 1.61 |
| SPBC19C7.05   |              | cell wall organization protein (predicted)                   |                                                          | 1.61 |
| SPBPB21E7.08  |              | pseudogene                                                   | pseudogene                                               | 1.61 |
| SPBC1921.04c  |              | sequence orphan                                              |                                                          | 1.59 |
| SPCC645.12c   |              | sequence orphan                                              | sequence orphan                                          | 1.58 |
| SPAC869.02c   |              | nitric oxide dioxygenase (predicted)                         | nitric oxide dioxygenase (predicted)                     | 1.57 |
| SPAC890.02c   | <i>alp7</i>  | TACC homolog (predicted)                                     | TACC homolog (predicted) (PMID 14742702)                 | 1.57 |
| SPAC25B8.02   | <i>sds3</i>  | Clr6 histone deacetylase complex subunit Sds3 (predicted)    | histone deacetylase complex subunit Sds3 (predicted)     | 1.57 |
| SPCC13B11.04c |              | glutathione-dependent formaldehyde dehydrogenase (predicted) |                                                          | 1.57 |
| SPAC688.06c   | <i>slx4</i>  | structure-specific endonuclease subunit                      | structure-specific endonuclease subunit (PMID 14528010)  | 1.56 |
| SPAC1399.01c  |              | membrane transporter (predicted)                             | purine permease (predicted)                              | 1.56 |
| SPBC115.03    |              | gfo/idh/mocA family oxidoreductase (predicted)               | gfo/idh/mocA family oxidoreductase (predicted)mito       | 1.56 |
| SPAC5H10.04   |              | NADPH dehydrogenase (predicted)                              | NADPH dehydrogenase (predicted)                          | 1.56 |
| SPBC530.02    |              | membrane transporter                                         |                                                          | 1.55 |
| SPCC162.04c   | <i>wtf13</i> | wtf element Wtf13                                            | wtf element Wtf13                                        | 1.55 |
| SPBC1198.07c  |              | mannan endo-1,6-alpha-mannosidase (predicted)                | mannan endo-1,6-alpha-mannosidase (predicted)            | 1.55 |
| SPAC1F8.05    | <i>isp3</i>  | sequence orphan                                              | sequence orphan                                          | 1.55 |
| SPAPB2B4.04c  |              | P-type ATPase, calcium transporting Pmc1                     | P-type ATPase, calcium transporting Pmc1 (PMID 12707717) | 1.54 |
| SPAC27F1.10   |              | sequence orphan                                              | sequence orphan                                          | 1.54 |
| SPCC584.16c   |              | sequence orphan                                              | sequence orphan                                          | 1.54 |
| SPCC417.04    |              | dubious                                                      | dubious                                                  | 1.54 |
| SPCC70.08c    |              | methyltransferase (predicted)                                | methyltransferase (predicted)                            | 1.53 |
| SPAC3A12.18   | <i>zwf1</i>  | glucose-6-phosphate 1-dehydrogenase (predicted)              |                                                          | 1.53 |
| SPCC162.10    | <i>ppk33</i> | serine/threonine protein kinase Ppk33 (predicted)            | serine/threonine protein kinase Ppk33 (predicted)        | 1.53 |
| SPAPB8E5.05   | <i>mfm1</i>  | M-factor precursor Mfm1                                      | M-factor precursor Mfm1                                  | 1.53 |
| SPBC119.14    | <i>rti1</i>  | Rad22 homolog Rti1                                           |                                                          | 1.53 |

|              |                |                                        |                                      |      |
|--------------|----------------|----------------------------------------|--------------------------------------|------|
| SPMIT.03     |                | mitochondrial DNA binding endonuclease |                                      | 1.52 |
| SPCC126.14   | <i>prp18</i>   | U5 snRNP-associated protein Prp18      | U5 snRNP-associated protein Prp18    | 1.52 |
| SPBCPT2R1.02 |                | sequence orphan                        |                                      | 1.51 |
| SPAC1039.08  |                | serine acetyltransferase (predicted)   | serine acetyltransferase (predicted) | 1.51 |
| SPCPB1C11.02 |                | amino acid permease, unknown 16        | amino acid permease, unknown 16      | 1.51 |
| SPCC1322.03  |                | TRP-like ion channel                   | TRP-like ion channel                 | 1.50 |
| SPCC1795.06  | <i>map2</i>    | P-factor                               | P-factor (PMID 8314086)              | 1.50 |
| SPCC4G3.08   | <i>psk1</i>    | serine/threonine protein kinase Psk1   | serine/threonine protein kinase Psk1 | 1.50 |
| SPBC1711.01c | <i>matmi_1</i> | mating-type m-specific polypeptide mi  |                                      | 1.50 |
| SPAC513.04   |                | sequence orphan                        | sequence orphan                      | 1.50 |

---
