# Supplementary material for: The Fission Yeast GATA Factor, Gaf1, Modulates Sexual Development via Direct Down-Regulation of ste11+ Expression in Response to Nitrogen Starvation
Source: PubMed Central journal article supplement (PMC3416868; doi:10.1371/journal.pone.0042409), 2012-08-10
Supplement: pone.0042409.s002.pdf [file pone.0042409.s002.pdf]

Table S2. List of the genes up-regulated in nitrogen-starved wild-type (*gaf1*<sup>+</sup>) cells (Group -N)

\* 1,301 genes

| Systematic    | Gene name     | Description (GeneDB)                              | Description (FunCat2)                             | Expression Ratio<br>(WT, -N) / (WT, +N) |
|---------------|---------------|---------------------------------------------------|---------------------------------------------------|-----------------------------------------|
| SPCC417.06c   | <i>nmt1</i>   | no message in thiamine Nmt1                       | no message in thiamine Nmt1                       | 1118.03                                 |
| SPAC589.07c   |               | urea transporter (predicted)                      |                                                   | 184.12                                  |
| SPCC1183.10   |               | conserved fungal protein                          | conserved fungal protein                          | 165.16                                  |
| SPAC11H11.01  |               | hydrolase (predicted)                             | hydrolase (predicted)                             | 107.88                                  |
| SPAC3C7.02c   | <i>map2</i>   | P-factor                                          | P-factor (PMID 8314086)                           | 101.73                                  |
| SPCC126.02c   | <i>ght3</i>   | hexose transporter Ght3                           | hexose transporter Ght3 (PMID 10735857)           | 93.52                                   |
| SPCC417.10    | <i>mug14</i>  | adducin                                           | adducin                                           | 82.76                                   |
| SPCC645.03c   | <i>mel1</i>   | alpha-galactosidase                               | alpha-galactosidase (PMID 15580593)               | 76.27                                   |
| SPCC1529.01   |               | sequence orphan                                   | sequence orphan                                   | 74.11                                   |
| SPCC622.06c   | <i>ght1</i>   | hexose transporter Ght1                           | hexose transporter Ght1 (PMID 10735857)           | 73.22                                   |
| SPAC32A11.03c |               | HbrB family protein                               | HbrB family protein                               | 64.14                                   |
| SPAC1002.06c  |               | sequence orphan                                   | sequence orphan                                   | 59.80                                   |
| SPBP8B7.23    |               | short chain dehydrogenase (predicted)             | short chain dehydrogenase                         | 56.61                                   |
| SPAC637.03    |               | pyruvate decarboxylase (predicted)                | pyruvate decarboxylase (predicted)                | 56.51                                   |
| SPBC31E1.04   | <i>mfm1</i>   | M-factor precursor Mfm1                           | M-factor precursor Mfm1                           | 55.56                                   |
| SPBC19C7.10   |               | conserved fungal protein                          | conserved fungal protein                          | 52.42                                   |
| SPAC26F1.04c  |               | sequence orphan                                   |                                                   | 52.18                                   |
| SPBC337.07c   |               | succinate-semialdehyde dehydrogenase (predicted)  | succinate-semialdehyde dehydrogenase (predicted)  | 51.13                                   |
| SPAC24C9.15c  |               | cation binding protein (predicted)                | cation binding protein (predicted)                | 49.90                                   |
| SPBC20F10.03  |               | epimarase (predicted)                             | epimarase (predicted)                             | 47.03                                   |
| SPBC146.02    |               | phosphoketolase (predicted)                       |                                                   | 46.46                                   |
| SPAC3C7.05c   | <i>ppk33</i>  | serine/threonine protein kinase Ppk33 (predicted) | serine/threonine protein kinase Ppk33 (predicted) | 46.35                                   |
| SPBC17D11.01  | <i>mei2</i>   | RNA-binding protein involved in meiosis Mei2      | RNA-binding protein involved in meiosis Mei2      | 43.74                                   |
| SPAC57A7.08   | <i>mug147</i> | sequence orphan                                   |                                                   | 43.26                                   |
| SPBC16D10.06  |               | sulfonate dioxygenase (predicted)                 | sulfonate dioxygenase (predicted)                 | 41.89                                   |
| SPCC1739.08c  |               | short chain dehydrogenase (predicted)             | short chain dehydrogenase (predicted)             | 41.51                                   |

|               |               |                                                                    |                                                                                       |       |
|---------------|---------------|--------------------------------------------------------------------|---------------------------------------------------------------------------------------|-------|
| SPBC14F5.10c  | <i>ght4</i>   | hexose transporter Ght4                                            | hexose transporter Ght4 (PMID 10735857)                                               | 41.18 |
| SPAC11D3.10   |               | rhomboid family protease                                           |                                                                                       | 41.09 |
| SPBC17D1.07c  |               | PI31 proteasome regulator related                                  |                                                                                       | 40.76 |
| SPAPB2B4.04c  |               | glucan 1,4-alpha-glucosidase (predicted)                           | glucan 1,4-alpha-glucosidase (predicted)                                              | 40.20 |
| SPAC23C11.10  | <i>inv1</i>   | beta-fructofuranosidase                                            | beta-fructofuranosidase                                                               | 39.29 |
| SPBC1683.02   | <i>spk1</i>   | MAP kinase Spk1                                                    | MAP kinase Spk1                                                                       | 36.46 |
| SPAC31G5.21   | <i>isp5</i>   | amino acid permease Isp5                                           | amino acid permease Isp5                                                              | 33.67 |
| SPACUNK4.16c  |               | esterase/lipase (predicted)                                        | esterase/lipase (predicted)                                                           | 33.62 |
| SPAC15A10.03c | <i>isp3</i>   | sequence orphan                                                    | sequence orphan                                                                       | 33.50 |
| SPCC1393.05   |               | ThiJ domain protein                                                | ThiJ domain protein                                                                   | 33.31 |
| SPAC1F7.10    |               | ThiJ domain protein                                                | ThiJ domain protein                                                                   | 33.27 |
| SPAC9G1.06c   |               | sequence orphan                                                    | sequence orphan                                                                       | 32.13 |
| SPBC19C2.11c  | <i>fbp1</i>   | fructose-1,6-bisphosphatase Fbp1                                   |                                                                                       | 31.86 |
| SPBPB21E7.01c |               | pseudo SPAC5H10.03                                                 | pseudo SPAC5H10.03                                                                    | 31.49 |
| SPCC285.06c   | <i>agl1</i>   | alpha-glucosidase Agl1                                             | alpha-glucosidase Agl1                                                                | 31.15 |
| SPBP4H10.10   |               | short chain dehydrogenase (predicted)                              | short chain dehydrogenase (predicted)                                                 | 28.82 |
| SPCC364.05    |               | sequence orphan                                                    |                                                                                       | 27.92 |
| SPBP19A11.02c | <i>eno102</i> | enolase (predicted)                                                | enolase (predicted)                                                                   | 26.65 |
| SPAC12B10.11  |               | copper amine oxidase (predicted)                                   |                                                                                       | 25.57 |
| SPBC1347.01c  |               | fumarate lyase superfamily                                         |                                                                                       | 24.32 |
| SPCC1281.08   |               | sequence orphan                                                    | sequence orphan                                                                       | 24.12 |
| SPAC2G11.05c  | <i>lsd90</i>  | Lsd90 protein                                                      |                                                                                       | 22.97 |
| SPAC6F12.08c  |               | sequence orphan                                                    |                                                                                       | 22.95 |
| SPBC19G7.13   | <i>pol4</i>   | DNA polymerase X family                                            | DNA polymerase X family                                                               | 22.72 |
| SPBC8E4.03    |               | uricase (predicted)                                                | uricase (predicted)                                                                   | 22.52 |
| SPBC365.08c   |               | MIP water channel (predicted)                                      | MIP water channel                                                                     | 22.08 |
| SPAC732.02c   |               | dubious                                                            | sequence orphan                                                                       | 21.84 |
| SPAC9E9.15    |               | mitochondrial iron-containing alcohol dehydrogenase family protein | glycerol dehydrogenase (Phlippen, Stevens, Wolf,Zimmermann manuscript in preparation) | 21.62 |
| SPAC24H6.11c  | <i>shk2</i>   | PAK-related kinase Shk2                                            | PAK-related kinase Shk2 (PMID 9660817) (PMID 9660818)                                 | 20.72 |
| SPBC3E7.02c   | <i>mug182</i> | YjeF family protein                                                | YjeF family protein                                                                   | 19.31 |
| SPCC777.05    |               | DUF1761 family protein                                             | DUF1761 family protein                                                                | 19.11 |
| SPBC337.12    | <i>mug114</i> | sequence orphan                                                    | sequence orphan                                                                       | 18.64 |
| SPAC12B10.16c |               | ThiJ domain protein                                                | ThiJ domain protein                                                                   | 18.51 |

|               |                |                                                            |                                                            |       |
|---------------|----------------|------------------------------------------------------------|------------------------------------------------------------|-------|
| SPAC15A10.16  |                | conserved fungal protein                                   |                                                            | 18.38 |
| SPBC16E9.11c  |                | UPF0103 family                                             | UPF0103 family                                             | 17.26 |
| SPCC965.07c   |                | glucose-6-phosphate 1-dehydrogenase (predicted)            | glucose-6-phosphate 1-dehydrogenase (predicted)            | 17.22 |
| SPCC1259.12c  |                | UDP-glucose 4-epimerase                                    |                                                            | 16.93 |
| SPAC31A2.12   |                | agmatinase (predicted)                                     | agmatinase (predicted)                                     | 16.87 |
| SPACUNK4.15   |                | phosphoglycerate mutase family                             | phosphoglycerate mutase family                             | 16.35 |
| SPAC227.04    |                | term=sequence orphan; date=20080121                        | previously annotated as dubious, may not be protein coding | 16.28 |
| SPAC22H10.07  |                | yippee-like protein                                        | yippee-like protein                                        | 16.23 |
| SPCC162.06c   |                | membrane transporter (predicted)                           | purine permease (predicted)                                | 16.03 |
| SPCC330.11    | <i>meu31</i>   | sequence orphan                                            | sequence orphan                                            | 15.76 |
| SPCC1223.13   | <i>gmh1</i>    | alpha-1,2-galactosyltransferase Gmh1 (predicted)           | alpha-1,2-galactosyltransferase Gmh1                       | 15.73 |
| SPBC15D4.15   | <i>rsv1</i>    | transcription factor Rsv1 (predicted)                      |                                                            | 15.71 |
| SPAC513.05    |                | sequence orphan                                            | sequence orphan                                            | 15.60 |
| SPBC21C3.10c  |                | pseudogene                                                 | pseudogene                                                 | 15.21 |
| SPCC622.05    |                | glucose-6-phosphate 1-dehydrogenase (predicted)            | glucose-6-phosphate 1-dehydrogenase (predicted)            | 15.14 |
| SPAC11H11.04  | <i>mug190</i>  | C2 domain protein                                          | C2 domain protein Tcb3 (predicted)                         | 15.06 |
| SPAC22H10.06c | <i>matmi_1</i> | mating-type m-specific polypeptide mi                      |                                                            | 15.00 |
| SPAC323.06c   | <i>mug143</i>  | sequence orphan                                            | sequence orphan                                            | 14.88 |
| SPCPB1C11.01  |                | dubious                                                    | sequence orphan                                            | 14.75 |
| SPBC21H7.06c  | <i>urg1</i>    | GTP cyclohydrolase II (predicted)                          | GTP cyclohydrolase (predicted)                             | 14.73 |
| SPAC19B12.07c | <i>rgs1</i>    | regulator of G-protein signaling Rgs1                      | regulator of G-protein signaling Rgs1                      | 14.48 |
| SPAC57A7.09   |                | pseudogene, similar to N-terminal of transmembrane channel | pseudogene, similar to N-terminal of transmembrane channel | 14.00 |
| SPCPB1C11.02  |                | phosphoprotein phosphatase (predicted)                     | phosphoprotein phosphatase                                 | 13.26 |
| SPBC32F12.09  |                | membrane transporter                                       | membrane transporter                                       | 13.12 |
| SPBC685.05    |                | FMN dependent dehydrogenase                                | FMN dependent dehydrogenase                                | 12.92 |
| SPAC17C9.12   |                | protein kinase inhibitor (predicted)                       | protein kinase inhibitor (predicted)                       | 12.84 |
| SPAC3G6.05    |                | DUF1770 family protein                                     | DUF1770 family protein                                     | 12.66 |
| SPAC24H6.01c  |                | human AMMECR1 homolog                                      | human AMMECR1 homolog                                      | 12.46 |
| SPBC36B7.09   | <i>dak2</i>    | dihydroxyacetone kinase Dak2                               | dihydroxyacetone kinase Dak2 (PMID 9804990)                | 12.35 |
| SPAC23H4.14   | <i>zym1</i>    | metallothionein                                            | metallothionein (PMID 12050156)                            | 12.32 |
| SPBC1683.13c  |                | conserved fungal protein                                   |                                                            | 12.30 |

|               |               |                                                       |                                        |       |
|---------------|---------------|-------------------------------------------------------|----------------------------------------|-------|
| SPAC2G11.03c  |               | allantoicase (predicted)                              | allantoicase (predicted)               | 12.13 |
| SPBC15C4.06c  |               | galactose-1-phosphate uridylyltransferase (predicted) |                                        | 12.08 |
| SPAC1F5.04c   |               | FAD-dependent amino acid oxidase (predicted)          | amino acid oxidase (predicted)         | 12.04 |
| SPAC630.04c   |               | methyltransferase (predicted)                         | methyltransferase (predicted)          | 12.02 |
| SPAC1834.09   |               | zinc finger protein zf-AN1 type                       | zinc finger protein zf-AN1 type        | 11.92 |
| SPAPB24D3.10c | <i>rec24</i>  | meiotic recombination protein Rec24                   | meiotic recombination protein Rec24    | 11.82 |
| SPBP35G2.11c  | <i>map1</i>   | MADS-box transcription factor Map1                    | MADS-box transcription factor Map1     | 11.77 |
| SPAC13G7.07   | <i>gpa1</i>   | G-protein alpha subunit                               |                                        | 11.54 |
| SPBC19F8.01c  | <i>mug108</i> | sequence orphan                                       | sequence orphan                        | 11.15 |
| SPBC3H7.08c   |               | sequence orphan                                       | sequence orphan                        | 11.14 |
| SPBC1271.14   | <i>ste7</i>   | meiotic suppressor protein Ste7                       | meiotic suppressor protein Ste7        | 11.05 |
| SPBC31F10.08  | <i>mug158</i> | sulfatase modifying factor 1 related                  |                                        | 11.04 |
| SPAC4G9.04c   | <i>wtf22</i>  | wtf element Wtf22                                     |                                        | 11.02 |
| SPBC4C3.12    | <i>ste4</i>   | adaptor protein Ste4                                  | adaptor protein Ste4                   | 10.87 |
| SPBC3E7.05c   |               | conserved fungal protein                              | conserved fungal protein               | 10.84 |
| SPAC11D3.16c  | <i>rho5</i>   | Rho family GTPase Rho5                                | Rho family GTPase Rho5                 | 10.67 |
| SPBC21.06c    | <i>mug191</i> | alpha-1,6-mannanase (predicted)                       | alpha-1,6- mannanase (predicted)       | 10.52 |
| SPBPB21E7.02c | <i>mug55</i>  | Cdc20/Fizzy family WD repeat protein                  | Cdc20/Fizzy family WD repeat protein   | 10.40 |
| SPCC594.06c   |               | potassium channel subunit (predicted)                 | potassium channel subunit (predicted)  | 10.30 |
| SPAC1610.04   | <i>aif1</i>   | apoptosis-inducing factor homolog Aif1                | apoptosis-inducing factor homolog Aif1 | 10.29 |
| SPCPJ732.02c  |               | pseudogene                                            |                                        | 10.23 |
| SPBC16C6.06   |               | uridine ribohydrolase (predicted)                     | uridine ribohydrolase (predicted)      | 10.11 |
| SPAPB1A10.10c |               | glycerophosphodiester transporter                     | glycerophosphodiester transporter      | 10.11 |
| SPAPB2B4.01c  |               | G-protein coupled receptor (predicted)                | G-protein coupled receptor (predicted) | 10.00 |
| SPAC17A5.11   |               | sequence orphan                                       | sequence orphan                        | 9.85  |
| SPBC36.11     | <i>map4</i>   | cell agglutination protein Map4                       |                                        | 9.74  |
| SPAC27F1.08   | <i>gti1</i>   | gluconate transporter inducer Gti1                    | gluconate transporter inducer Gti1     | 9.66  |
| SPBC1A4.04    |               | sequence orphan                                       | sequence orphan                        | 9.58  |
| SPAC17A2.11   | <i>mmf2</i>   | homologous Pmf1p factor 1                             |                                        | 9.58  |
| SPAC1952.17c  | <i>isp4</i>   | OPT oligopeptide transporter family                   |                                        | 9.49  |
| SPBC24C6.07   |               | sequence orphan                                       | sequence orphan                        | 9.40  |
| SPAC26A3.14c  |               | ureidoglycolate hydrolase (predicted)                 | ureidoglycolate hydrolase (predicted)  | 9.40  |
| SPBC56F2.06   |               | aldo/keto reductase, unknown biological role          |                                        | 9.24  |
| SPCC1020.05   |               | hydrolase (inferred from context)                     | hydrolase (inferred from context)      | 9.18  |
| SPCC1393.10   |               | sequence orphan                                       | sequence orphan                        | 8.92  |

|               |             |                                                                               |                                                                              |      |
|---------------|-------------|-------------------------------------------------------------------------------|------------------------------------------------------------------------------|------|
| SPAC167.08    |             | OPT oligopeptide transporter family                                           | OPT oligopeptide transporter family                                          | 8.80 |
| SPBC21.07c    | <i>isp7</i> | 2-OG-Fe(II) oxygenase superfamily protein                                     | 2-OG-Fe(II) oxygenase superfamily protein                                    | 8.46 |
| SPCC622.02    |             | carbon-sulfur lyase (predicted)                                               | carbon-sulfur lyase (predicted)                                              | 8.45 |
| SPAC323.07c   |             | S-adenosylmethionine-dependent methyltransferase (predicted)                  | S-adenosylmethionine-dependent methyltransferase (predicted)                 | 8.44 |
| SPAC2F7.08c   | <i>mfm3</i> | M-factor precursor Mfm3                                                       |                                                                              | 8.41 |
| SPBC1718.07c  | <i>bsu1</i> | high-affinity import carrier for pyridoxine, pyridoxal, and pyridoxamine Bsu1 | high-affinity import carrier for pyridoxine,pyridoxal, and pyridoxamine Bsu1 | 8.40 |
| SPBC354.15    |             | phosphoprotein phosphatase (predicted)                                        |                                                                              | 8.40 |
| SPAC15A10.05c |             | conserved fungal protein                                                      | conserved fungal protein                                                     | 8.29 |
| SPCC777.13    |             | NADH-dependent flavin oxidoreductase (predicted)                              |                                                                              | 7.97 |
| SPAC17A2.01   |             | sequence orphan                                                               | sequence orphan                                                              | 7.94 |
| SPCPB1C11.03  |             | DNAJ domain protein                                                           | DNAJ domain protein                                                          | 7.81 |
| SPAC1687.12c  |             | riboflavin synthase                                                           | riboflavin synthase (PMID 14690539)                                          | 7.78 |
| SPAC1635.01   |             | tspO homolog                                                                  |                                                                              | 7.60 |
| SPCPB16A4.06c |             | autophagy associated protein (predicted)                                      |                                                                              | 7.59 |
| SPAC750.04c   |             | membrane transporter (predicted)                                              | membrane transporter (predicted)                                             | 7.57 |
| SPCC757.13    |             | amino acid permease, unknown 12                                               |                                                                              | 7.57 |
| SPAC2E1P3.01  |             | N-acetyltransferase (predicted)                                               | N-acetyltransferase (predicted)                                              | 7.55 |
| SPBC14C8.08c  | <i>wtf3</i> | wtf element Wtf3                                                              | wtf element Wtf3                                                             | 7.50 |
| SPAC3A11.10c  |             | S. pombe specific UPF0321 family protein 3                                    | S. pombe specific UPF0321 family protein 3                                   | 7.42 |
| SPBC2F12.09c  | <i>ste6</i> | guanyl-nucleotide exchange factor Ste6                                        | guanyl-nucleotide exchange factor Ste6                                       | 7.40 |
| SPAC144.17c   | <i>tms1</i> | hexitol dehydrogenase (predicted)                                             | hexitol dehydrogenase (predicted)                                            | 7.40 |
| SPAC3A12.02   | <i>gna1</i> | glucosamine-phosphate N-acetyltransferase                                     | glucosamine-phosphate N-acetyltransferase                                    | 7.34 |
| SPAP27G11.08c |             | conserved protein (fungal and plant)                                          | conserved protein (fungal and plant)                                         | 7.31 |
| SPAC13F5.03c  |             | nucleotide-sugar 4,6-dehydratase (predicted)                                  |                                                                              | 7.21 |
| SPBC725.06c   | <i>aes1</i> | enhancer of RNA-mediated gene silencing                                       | enhancer of RNA-mediated gene silencing (PMID 12034844)                      | 7.14 |
| SPCC4B3.17    | <i>ppr1</i> | L-azetidine-2-carboxylic acid acetyltransferase                               | L-azetidine-2-carboxylic acid acetyltransferase (PMID 12761200)              | 7.09 |
| SPAC1A6.06c   | <i>ish1</i> | LEA domain protein                                                            |                                                                              | 6.93 |
| SPAC823.03    |             | dipeptidyl aminopeptidase (predicted)                                         | dipeptidyl aminopeptidase (predicted)                                        | 6.91 |

|               |              |                                                      |                                                      |      |
|---------------|--------------|------------------------------------------------------|------------------------------------------------------|------|
| SPBC29A3.03c  |              | short chain dehydrogenase (predicted)                | short chain dehydrogenase (predicted)                | 6.85 |
| SPBC21C3.11   |              | pyrimidine 5'-nucleotidase (predicted)               | pyrimidine 5'-nucleotidase (predicted)               | 6.82 |
| SPBC1683.09c  |              | peptidase family C54                                 | peptidase family C54                                 | 6.81 |
| SPBC776.15c   |              | thioredoxin peroxidase                               | thioredoxin peroxidase                               | 6.80 |
| SPBC1711.01c  |              | hydrolase                                            |                                                      | 6.80 |
| SPBC365.15    |              | amidotransferase (predicted)                         | glutamine amidotransferase (predicted)               | 6.78 |
| SPAC16E8.03   |              | WD repeat protein                                    | WD repeat protein                                    | 6.72 |
| SPBC23E6.03c  |              | galactokinase Gal1 (predicted)                       |                                                      | 6.72 |
| SPAC57A10.08c |              | copper amine oxidase (predicted)                     | copper amine oxidase (predicted)                     | 6.70 |
| SPAC1D4.11c   |              | FUN14 family protein                                 | FUN14 family protein                                 | 6.70 |
| SPAC29E6.07   | <i>wtf4</i>  | wtf element Wtf4, pseudo                             | wtf element Wtf4, pseudo                             | 6.70 |
| SPBC691.05c   |              | sequence orphan                                      | sequence orphan                                      | 6.58 |
| SPAC23H3.15c  |              | sequence orphan                                      | sequence orphan                                      | 6.58 |
| SPBC106.02c   | <i>map3</i>  | pheromone M-factor receptor                          | pheromone M-factor receptor (PMID 8380233)           | 6.53 |
| SPBC14F5.11c  |              | pyridoxal reductase (predicted)                      | pyridoxal reductase (predicted)                      | 6.42 |
| SPAC6F6.08c   | <i>fus1</i>  | formin Fus1                                          | formin Fus1                                          | 6.37 |
| SPAC1399.04c  | <i>atg22</i> | autophagy associated protein Atg22 (predicted)       | autophagy associated protein Atg22 (predicted)       | 6.29 |
| SPBC16G5.16   |              | DUF962 family protein                                | conserved protein (broad species distribution)       | 6.27 |
| SPAC22H10.13  |              | alpha,alpha-trehalose-phosphate synthase (predicted) | alpha,alpha-trehalose-phosphate synthase (predicted) | 6.21 |
| SPBC839.06    |              | sequence orphan                                      | sequence orphan                                      | 6.17 |
| SPBC1652.01   |              | serine protease (predicted)                          | serine protease (predicted)                          | 6.12 |
| SPBC1709.16c  |              | iron/ascorbate oxidoreductase family                 |                                                      | 6.07 |
| SPBC4B4.11    |              | membrane transporter (predicted)                     |                                                      | 6.01 |
| SPAC19D5.07   |              | conserved fungal protein                             | conserved fungal protein                             | 6.01 |
| SPCC576.16c   |              | DNA-3-methyladenine glycosidase Mag2 (predicted)     |                                                      | 5.98 |
| SPCC1840.04   |              | fungal cellulose binding domain protein              | fungal cellulose binding domain protein              | 5.98 |
| SPBC17F3.02   |              | agmatinase 2 (predicted)                             |                                                      | 5.96 |
| SPAC688.13    | <i>rem1</i>  | meiosis-specific cyclin Rem1                         |                                                      | 5.94 |
| SPCC70.07c    |              | NAD-dependent glutamate dehydrogenase (predicted)    | NAD-dependent glutamate dehydrogenase (predicted)    | 5.90 |
| SPAC25H1.09   | <i>atg20</i> | sorting nexin Atg20                                  | sorting nexin Atg20                                  | 5.88 |

|               |               |                                                         |                                                         |      |
|---------------|---------------|---------------------------------------------------------|---------------------------------------------------------|------|
| SPBC1683.06c  | <i>ste11</i>  | transcription factor Ste11                              |                                                         | 5.87 |
| SPAC2E12.02   | <i>mug8</i>   | conserved fungal protein                                | conserved fungal protein                                | 5.82 |
| SPBC1348.14c  | <i>mug86</i>  | acetate transporter (predicted)                         | acetate transporter (predicted)                         | 5.80 |
| SPCC550.09    | <i>cda1</i>   | chitin deacetylase Cda1                                 | chitin deacetylase Cda1                                 | 5.72 |
| SPBC215.11c   |               | conserved eukaryotic protein                            | conserved eukaryotic protein                            | 5.71 |
| SPBC15D4.07c  |               | conserved fungal protein                                | conserved fungal protein                                | 5.63 |
| SPAC607.07c   |               | human aprataxin homolog                                 | conserved eukaryotic protein                            | 5.62 |
| SPCC1393.02c  | <i>wtf17</i>  | wtf element Wtf17, pseudo                               | wtf element Wtf17, pseudo                               | 5.60 |
| SPCC965.05c   | <i>isp6</i>   | vacuolar serine protease Isp6                           | vacuolar serine protease Isp6                           | 5.54 |
| SPAC140.04    | <i>yak3</i>   | aldose reductase YakC                                   |                                                         | 5.54 |
| SPAC27E2.06c  |               | X-Pro dipeptidase (predicted)                           |                                                         | 5.49 |
| SPBC2D10.20   | <i>mug168</i> | sequence orphan                                         | sequence orphan                                         | 5.42 |
| SPAC31F12.01  | <i>hri1</i>   | eIF2 alpha kinase Hri1                                  | eIF2 alpha kinase Hri1                                  | 5.40 |
| SPAC26F1.14c  |               | xylose and arabinose reductase (predicted)              | xylose and arabinose reductase (predicted)              | 5.39 |
| SPAC664.13    | <i>ran1</i>   | serine/threonine protein kinase Ran1                    |                                                         | 5.38 |
| SPBC20F10.10  | <i>cox3</i>   | cytochrome c oxidase 3                                  | cytochrome c oxidase 3; similar to S. cerevisiae Q0275  | 5.38 |
| SPBC14C8.11c  | <i>ucp10</i>  | UBA/UAS domain protein Ucp10                            | UBA/UAS domain protein Ucp10                            | 5.37 |
| SPBC8D2.12c   |               | aminotransferase class-III, unknown specificity         | aminotransferase class-III (predicted)                  | 5.35 |
| SPAC1006.09   |               | glycerophosphoryl diester phosphodiesterase (predicted) | glycerophosphoryl diester phosphodiesterase (predicted) | 5.32 |
| SPCC126.04c   | <i>str3</i>   | siderophore-iron transporter Str3                       | siderophore-iron transporter Str3 (PMID 12888492)       | 5.31 |
| SPAC29B12.11c |               | sequence orphan                                         | sequence orphan                                         | 5.30 |
| SPBC800.14c   |               | WD repeat protein Atg18                                 | WD repeat protein Atg18                                 | 5.30 |
| SPAC6B12.13   |               | sequence orphan                                         | sequence orphan                                         | 5.28 |
| SPAC16E8.02   |               | pseudogene                                              | pseudogene                                              | 5.24 |
| SPCC622.11    | <i>ayr1</i>   | 1-acyldihydroxyacetone phosphate reductase (predicted)  | 1-acyldihydroxyacetone phosphate reductase (predicted)  | 5.22 |
| SPAC29B12.14c |               | human MAWBP homolog                                     | human MAWBP homolog                                     | 5.22 |
| SPAP7G5.03    |               | SPRY domain protein                                     | SPRY domain protein                                     | 5.21 |
| SPBC1198.06c  |               | phosphomethylpyrimidine kinase (predicted)              |                                                         | 5.19 |
| SPAC8F11.05c  |               | NAD binding dehydrogenase family protein                | NAD binding dehydrogenase family protein                | 5.18 |

|               |              |                                                             |                                                             |      |
|---------------|--------------|-------------------------------------------------------------|-------------------------------------------------------------|------|
| SPBC1773.08c  |              | phosphoprotein phosphatase (predicted)                      | phosphoprotein phosphatase (predicted)                      | 5.12 |
| SPAC25G10.07c | <i>ubp11</i> | ubiquitin C-terminal hydrolase Ubp11                        | ubiquitin C-terminal hydrolase Ubp11                        | 5.07 |
| SPBC32F12.01c |              | AMP-binding dehydrogenase (predicted)                       | AMP-binding dehydrogenase (predicted)                       | 5.05 |
| SPAC1805.15c  |              | aldehyde dehydrogenase (predicted)                          | aldehyde dehydrogenase (predicted)                          | 5.05 |
| SPAC3H1.14    |              | NADH/NADPH dependent indole-3-acetaldehyde reductase AKR3C2 | NADH/NADPH dependent indole-3-acetaldehyde reductase AKR3C2 | 5.03 |
| SPAC24B11.11c |              | sequence orphan                                             | sequence orphan                                             | 5.00 |
| SPBP4H10.09   |              | alpha-glucosidase                                           |                                                             | 5.00 |
| SPBPB2B2.01   |              | membrane transporter                                        | membrane transporter                                        | 4.93 |
| SPAC9G1.09    | <i>wtf18</i> | wtf element Wtf18                                           | wtf element Wtf18                                           | 4.91 |
| SPAC1B1.02c   |              | WD repeat protein, human WDR44 family                       |                                                             | 4.86 |
| SPBC3E7.01    | <i>rsv2</i>  | transcription factor Rsv2                                   |                                                             | 4.86 |
| SPCC737.05    | <i>gst3</i>  | glutathione S-transferase Gst3                              | glutathione S-transferase (PMID 12151111)                   | 4.82 |
| SPAC31G5.12c  | <i>srk1</i>  | MAPK-activated protein kinase Srk1                          | MAPK-activated protein kinase Srk1                          | 4.81 |
| SPCC737.04    |              | conserved fungal protein                                    | conserved fungal protein                                    | 4.78 |
| SPAC23C11.08  |              | hydroxyacid dehydrogenase (predicted)                       |                                                             | 4.70 |
| SPAPB1A10.14  | <i>pyp2</i>  | tyrosine phosphatase Pyp2                                   | tyrosine phosphatase Pyp2                                   | 4.69 |
| SPCC1393.12   | <i>mag1</i>  | DNA-3-methyladenine glycosylase Mag1                        | DNA-3-methyladenine glycosylase Mag1                        | 4.67 |
| SPCC4G3.12c   |              | ubiquitin-protein ligase E3 (predicted)                     |                                                             | 4.64 |
| SPCC622.04    |              | DUF423 protein                                              | conserved protein (broad species distribution)              | 4.61 |
| SPAC4G9.19    |              | conserved fungal protein                                    | conserved fungal protein                                    | 4.60 |
| SPCC1620.09c  | <i>bqt2</i>  | bouquet formation protein Bqt2                              | bouquet formation protein Bqt2                              | 4.60 |
| SPBC24C6.09c  | <i>exg3</i>  | glucan 1,3-beta-glucosidase Exg3                            |                                                             | 4.60 |
| SPAPB1A11.02  |              | conserved fungal protein                                    | conserved fungal protein                                    | 4.56 |
| SPBP8B7.13    |              | thiosulfate sulfurtransferase                               |                                                             | 4.55 |
| SPAC1039.07c  |              | hydantoin racemase family (predicted)                       | hydantoin racemase family (predicted)                       | 4.53 |
| SPBC1703.12   | <i>rad50</i> | DNA repair protein Rad50                                    | DNA repair protein Rad50                                    | 4.50 |
| SPBC660.09    | <i>rhp54</i> | Rad54 homolog Rhp54                                         | Rad54 homolog Rhp54                                         | 4.49 |
| SPCC736.13    | <i>meu32</i> | sequence orphan                                             | sequence orphan                                             | 4.48 |
| SPAC13G6.03   |              | DUF1773 family protein 4                                    | DUF1773 family protein 4                                    | 4.48 |
| SPAC3H1.08c   |              | conserved protein (fungal and bacterial)                    |                                                             | 4.45 |
| SPCC1906.04   |              | subtilisin related protein (predicted)                      | protease inhibitor (predicted)                              | 4.42 |



|               |               |                                                                                    |                                                                            |      |
|---------------|---------------|------------------------------------------------------------------------------------|----------------------------------------------------------------------------|------|
| SPBC17D11.08  |               | PI31 proteasome regulator related                                                  |                                                                            | 4.40 |
| SPAC1399.01c  | <i>ams1</i>   | alpha-mannosidase (predicted)                                                      | alpha-mannosidase (predicted)                                              | 4.40 |
| SPCC794.08    | <i>mug133</i> | S. pombe specific UPF0300 family protein 2                                         | S. pombe specific UPF0300 family protein 2                                 | 4.37 |
| SPCC74.03c    |               | conserved fungal protein                                                           |                                                                            | 4.37 |
| SPAC11D3.11c  |               | short chain dehydrogenase (predicted)                                              | short chain dehydrogenase                                                  | 4.36 |
| SPCC1183.11   |               | conserved eukaryotic protein                                                       |                                                                            | 4.32 |
| SPCC4G3.08    | <i>sst4</i>   | sorting receptor for ubiquitinated membrane proteins, ESCRT 0 complex subunit Sst4 | sorting receptor for ubiquitinated membrane proteins (ISS) (PMID 12055639) | 4.29 |
| SPAC26F1.07   | <i>jmj2</i>   | histone demethylase Jmj2 (predicted)                                               | histone demethylase Jmj2 (predicted)                                       | 4.29 |
| SPBC428.12c   | <i>wtf21</i>  | wtf element Wtf21                                                                  | wtf element Wtf21                                                          | 4.27 |
| SPBC3E7.04c   |               | purine transporter (predicted)                                                     | purine transporter (predicted)                                             | 4.26 |
| SPAC17C9.05c  | <i>sut1</i>   | alpha-glucoside transporter                                                        | alpha-glucoside transporter (PMID 11136464)                                | 4.23 |
| SPBC21C3.01c  |               | But2 family protein                                                                | S. pombe specific But2 family protein                                      | 4.23 |
| SPBC23E6.01c  |               | zf-C2H2 type zinc finger protein                                                   | zinc finger protein                                                        | 4.23 |
| SPAC18G6.12c  |               | UPF0061 family protein                                                             | UPF0061 family protein                                                     | 4.20 |
| SPAC9.10      |               | xylulose kinase (predicted)                                                        | xylulose kinase (predicted)                                                | 4.20 |
| SPAC6F12.15c  | <i>syj2</i>   | inositol-polyphosphate 5-phosphatase (synaptojanin homolog 2)                      |                                                                            | 4.17 |
| SPAC521.04c   | <i>sst2</i>   | human AMSH protein homolog                                                         | human amsh protein homolog                                                 | 4.16 |
| SPBC1683.01   | <i>git5</i>   | heterotrimeric G protein beta subunit Git5                                         |                                                                            | 4.15 |
| SPCC5E4.10c   | <i>cgs1</i>   | cAMP-dependent protein kinase regulatory subunit Cgs1                              | cAMP-dependent protein kinase regulatory subunit Cgs1                      | 4.15 |
| SPAC11D3.07c  | <i>ctr6</i>   | vacuolar copper transporter Ctr6                                                   |                                                                            | 4.15 |
| SPAC5D6.07c   |               | conserved protein                                                                  | conserved protein                                                          | 4.14 |
| SPBC18H10.10c |               | dubious                                                                            | dubious                                                                    | 4.13 |
| SPAC22G7.11c  |               | serine acetyltransferase (predicted)                                               | serine acetyltransferase (predicted)                                       | 4.12 |
| SPAC23A1.16c  |               | SNARE Vam7 (predicted)                                                             | SNARE Vam7 (predicted)                                                     | 4.11 |
| SPBC11B10.05c | <i>puc1</i>   | cyclin Puc1                                                                        |                                                                            | 4.11 |
| SPAC3A11.06   | <i>srw1</i>   | CDK inhibitor Srw1                                                                 | CDK inhibitor Srw1                                                         | 4.10 |
| SPCC1450.09c  | <i>chr2</i>   | chitin synthase regulatory factor (putative) Chr2                                  | chitin synthase regulatory factor (putative) Chr2 (PMID 15449309)          | 4.10 |
| SPAC2C4.09    |               | sulphate transporter (predicted)                                                   | sulphate transporter (predicted)                                           | 4.09 |
| SPAC3G6.07    |               | sequence orphan                                                                    |                                                                            | 4.08 |
| SPAC22E12.03c |               | human RNF family homolog                                                           | human RNF family homolog                                                   | 4.07 |

|               |               |                                                      |                                                                  |      |
|---------------|---------------|------------------------------------------------------|------------------------------------------------------------------|------|
| SPAC5D6.08c   |               | LMBR1-like membrane protein                          | LMBR1-like membrane protein                                      | 4.06 |
| SPAC186.03    |               | aminotransferase class-III, unknown specificity      | 4-aminobutyrate transaminase                                     | 4.06 |
| SPAC513.04    |               | conserved fungal protein                             | conserved fungal protein                                         | 4.05 |
| SPCC338.02    |               | pseudogene (predicted)                               |                                                                  | 4.05 |
| SPAC23D3.14c  |               | sequence orphan                                      | sequence orphan                                                  | 4.04 |
| SPBC8E4.04    | <i>mug185</i> | DNAJ domain protein Jjj family                       | DNAJ domain protein Jjj family                                   | 4.04 |
| SPAC1556.01c  |               | sequence orphan                                      | sequence orphan                                                  | 4.04 |
| SPAC4D7.01c   |               | MS ion channel protein 2                             | MS ion channel protein 2                                         | 4.03 |
| SPBC14C8.09c  |               | acetyl-CoA hydrolase                                 | acetyl-CoA hydrolase                                             | 4.02 |
| SPAC2E12.03c  |               | conserved fungal protein                             | conserved fungal protein                                         | 4.01 |
| SPAC29E6.01   | <i>gpi12</i>  | pig-L (predicted)                                    | pig-L                                                            | 4.01 |
| SPAC29B12.03  |               | conjugation protein (predicted)                      | conjugation protein (predicted)                                  | 4.00 |
| SPBC26H8.12   |               | PSP1 family protein                                  |                                                                  | 3.99 |
| SPAC13C5.04   |               | succinate-semialdehyde dehydrogenase (predicted)     | succinate-semialdehyde dehydrogenase (predicted)                 | 3.99 |
| SPAC5H10.11   | <i>ppk35</i>  | serine/threonine protein kinase Ppk35                | serine/threonine protein kinase Ppk35                            | 3.93 |
| SPBC11B10.07c |               | mitochondrial outer membrane protein (predicted)     |                                                                  | 3.92 |
| SPCC622.01c   |               | pseudogene                                           | pseudogene                                                       | 3.91 |
| SPAC4G9.07    |               | sequence orphan                                      | sequence orphan                                                  | 3.90 |
| SPAC1F12.09   |               | carbohydrate kinase (predicted)                      | carbohydrate kinase (predicted)                                  | 3.90 |
| SPAC22H10.10  | <i>uga1</i>   | 4-aminobutyrate aminotransferase (GABA transaminase) | 4-aminobutyrate aminotransferase (GABA transaminase) (predicted) | 3.89 |
| SPBC776.05    | <i>rev1</i>   | deoxycytidyl transferase Rev1 (predicted)            | deoxycytidyl transferase Rev1 (predicted)                        | 3.87 |
| SPCC1739.01   | <i>mug93</i>  | TPR repeat protein, meiotically spliced              |                                                                  | 3.86 |
| SPAC821.04c   |               | CTLH domain                                          | CTLH domain                                                      | 3.85 |
| SPCC24B10.07  | <i>apg3</i>   | autophagy associated protein Apg3 (predicted)        | autophagy associated protein Apg3 (predicted)                    | 3.85 |
| SPCC777.17c   |               | zinc finger protein, zf-C2H2 type/UBA domain protein | zinc finger protein                                              | 3.84 |
| SPAC16.05c    |               | mitochondrial peptidase (predicted)                  |                                                                  | 3.83 |
| SPCC191.01    |               | NADH dehydrogenase                                   |                                                                  | 3.82 |
| SPAC4G9.13c   |               | F-box protein                                        | F-box protein, unnamed                                           | 3.82 |
| SPCC18B5.03   | <i>amt1</i>   | ammonium transporter Amt1                            | ammonium transporter Amt1                                        | 3.81 |
| SPAC23C4.16c  | <i>atg13</i>  | autophagy associated protein Atg13 (predicted)       | autophagy associated protein Atg13 (predicted)                   | 3.80 |

|               |              |                                                                                             |                                                                                             |      |
|---------------|--------------|---------------------------------------------------------------------------------------------|---------------------------------------------------------------------------------------------|------|
| SPBC32H8.06   |              | human WW domain binding protein-2 ortholog                                                  | human WW domain binding protein-2 ortholog                                                  | 3.79 |
| SPAC15E1.02c  | <i>mvp1</i>  | sorting nexin Mvp1                                                                          | sorting nexin Mvp1                                                                          | 3.79 |
| SPCC70.05c    | <i>meu10</i> | GPI anchored cell surface protein (predicted)                                               | conserved fungal family                                                                     | 3.78 |
| SPAC3G9.11c   |              | conserved fungal protein                                                                    | conserved fungal protein                                                                    | 3.78 |
| SPAP32A8.02   |              | sequence orphan                                                                             | sequence orphan                                                                             | 3.78 |
| SPBPB21E7.04c | <i>mug63</i> | TLDC domain protein 1                                                                       | TLDC domain protein 1                                                                       | 3.77 |
| SPBC18E5.10   |              | membrane transporter                                                                        |                                                                                             | 3.77 |
| SPAC1093.04c  |              | gluconokinase                                                                               | gluconokinase                                                                               | 3.76 |
| SPCC74.09     |              | membrane transporter                                                                        | membrane transporter                                                                        | 3.75 |
| SPAC644.06c   |              | P-type ATPase, calcium transporting Pmc1                                                    | P-type ATPase, calcium transporting Pmc1 (PMID 12707717)                                    | 3.75 |
| SPCC18.17c    |              | Usp (universal stress protein) family protein, implicated in meiotic chromosome segregation | Usp (universal stress protein) family protein, implicated in meiotic chromosome segregation | 3.74 |
| SPAC343.04c   | <i>mfm2</i>  | M-factor precursor Mfm2                                                                     | M-factor precursor Mfm2                                                                     | 3.72 |
| SPAC13G7.05   |              | mitochondrial RNA-binding protein (predicted)                                               |                                                                                             | 3.70 |
| SPCC965.12    |              | DUF1772 family protein                                                                      | DUF1772 family protein                                                                      | 3.70 |
| SPAC30D11.01c |              | sequence orphan                                                                             |                                                                                             | 3.69 |
| SPAP8A3.12c   |              | amino acid permease, unknown 4                                                              | amino acid permease, unknown 4                                                              | 3.67 |
| SPBC1706.01   | <i>pka1</i>  | cAMP-dependent protein kinase catalytic subunit Pka1                                        | cAMP-dependent protein kinase catalytic subunit Pka1 (PMID 8144551)                         | 3.67 |
| SPBC15D4.13c  | <i>gos1</i>  | SNARE Gos1 (predicted)                                                                      | SNARE Gos1                                                                                  | 3.66 |
| SPCC1450.06c  |              | bax inhibitor-like protein                                                                  | bax inhibitor-like protein                                                                  | 3.66 |
| SPAPB2B4.06   |              | sequence orphan                                                                             | sequence orphan                                                                             | 3.65 |
| SPAC11D3.08c  |              | mitochondrial electron carrier (predicted)                                                  | mitochondrial electron carrier (predicted)                                                  | 3.64 |
| SPCC1494.09c  | <i>mfr1</i>  | fizzy-related protein Mfr1                                                                  |                                                                                             | 3.64 |
| SPAC977.10    |              | alpha-1,2-mannosyltransferase (predicted)                                                   | alpha-1,2-mannosyltransferase (predicted)                                                   | 3.62 |
| SPAC1F8.04c   |              | phosphatidylinositol(3)-phosphate binding protein (predicted)                               |                                                                                             | 3.60 |
| SPBC9B6.03    |              | vacuolar sorting protein Vps60                                                              | vacuolar sorting protein Vps60                                                              | 3.58 |
| SPCC63.13     |              | UPF0031 family protein                                                                      | conserved protein (broad species distribution)                                              | 3.55 |
| SPCC1494.01   | <i>mmm1</i>  | Mdm10/Mdm12/Mmm1 complex subunit Mmm1 (predicted)                                           |                                                                                             | 3.54 |

|               |               |                                                                |                                                                |      |
|---------------|---------------|----------------------------------------------------------------|----------------------------------------------------------------|------|
| SPCC970.01    |               | ubiquitin-protein ligase E3 (predicted)                        | ubiquitin-protein ligase E3 (predicted)                        | 3.51 |
| SPCC794.02    |               | conserved fungal protein                                       | conserved fungal protein                                       | 3.51 |
| SPBC1773.17c  | <i>ubp8</i>   | ubiquitin C-terminal hydrolase Ubp8 (predicted)                | ubiquitin C-terminal hydrolase Ubp8                            | 3.51 |
| SPBC3E7.06c   | <i>idh2</i>   | isocitrate dehydrogenase (NAD+) subunit 2                      | isocitrate dehydrogenase (NAD+) subunit 2                      | 3.50 |
| SPCC417.05c   |               | amino acid permease, unknown 16                                | amino acid permease, unknown 16                                | 3.50 |
| SPCC663.02    |               | sequence orphan                                                |                                                                | 3.50 |
| SPAC57A7.05   |               | ubiquitin-protein ligase E3 (predicted)                        |                                                                | 3.49 |
| SPBC1A4.06c   |               | uncharacterised trans-sulfuration enzyme (predicted)           | cystathionine gamma-synthase (predicted)                       | 3.48 |
| SPCC1840.06   | <i>mug112</i> | sequence orphan                                                | sequence orphan                                                | 3.48 |
| SPAC1565.04c  |               | alcohol dehydrogenase (predicted)                              | alcohol dehydrogenase (predicted)                              | 3.47 |
| SPBC12C2.08   |               | sequence orphan                                                | sequence orphan                                                | 3.47 |
| SPBP8B7.08c   | <i>gut2</i>   | glycerol-3-phosphate dehydrogenase Gut2                        | glycerol-3-phosphate dehydrogenase Gut2                        | 3.47 |
| SPCC1450.08c  | <i>ppk8</i>   | serine/threonine protein kinase Ppk8 (predicted)               | serine/threonine protein kinase Ppk8 (predicted)               | 3.47 |
| SPAC750.07c   |               | adenine deaminase (predicted)                                  | adenine deaminase (predicted)                                  | 3.47 |
| SPAC23A1.17   |               | vacuolar carboxypeptidase (predicted)                          | vacuolar carboxypeptidase (predicted)                          | 3.45 |
| SPBP23A10.09  | <i>cid13</i>  | poly(A) polymerase Cid13                                       | poly(A) polymerase Cid13 (PMID 12062100)                       | 3.45 |
| SPBC25B2.08   | <i>mug99</i>  | meiotically upregulated gene Mug99                             | meiotically upregulated gene Mug99                             | 3.44 |
| SPAC1F5.08c   | <i>mug180</i> | esterase/lipase (predicted)                                    |                                                                | 3.44 |
| SPCC622.21    | <i>wtf24</i>  | wtf element Wtf24                                              |                                                                | 3.43 |
| SPAC13G6.05c  |               | proline specific permease (predicted)                          | proline specific permease (predicted)                          | 3.42 |
| SPBC16G5.19   | <i>atg8</i>   | autophagy associated protein Atg8 (predicted)                  |                                                                | 3.42 |
| SPCC1739.03   |               | mitochondrial ribosomal small subunit                          |                                                                | 3.41 |
| SPCC1919.06c  |               | Vid27 family protein                                           | Vid27 family protein                                           | 3.41 |
| SPAC17C9.16c  | <i>pop1</i>   | F-box/WD repeat protein Pop1                                   |                                                                | 3.41 |
| SPAC25B8.10   |               | aldo/keto reductase involved in pentose catabolism (predicted) |                                                                | 3.39 |
| SPAC1D4.13    | <i>cta3</i>   | P-type ATPase, calcium transporting Cta3                       | P-type ATPase, calcium transporting Cta3                       | 3.39 |
| SPAC3H1.06c   | <i>ubc8</i>   | ubiquitin conjugating enzyme Ubc8                              |                                                                | 3.39 |
| SPAPB24D3.08c | <i>idh1</i>   | isocitrate dehydrogenase (NAD+) subunit 1 Idh1                 | isocitrate dehydrogenase (NAD+) subunit 1 Idh1 (PMID 10975257) | 3.38 |

|               |               |                                                                  |                                                       |      |
|---------------|---------------|------------------------------------------------------------------|-------------------------------------------------------|------|
| SPBC725.05c   | <i>wtf10</i>  | wtf element Wtf10                                                | wtf element Wtf10                                     | 3.38 |
| SPBC1683.11c  | <i>wtf14</i>  | wtf element Wtf14                                                | wtf element Wtf14                                     | 3.38 |
| SPAC1952.11c  |               | zinc binding dehydrogenase                                       | zinc binding dehydrogenase                            | 3.38 |
| SPAC4G8.10    | <i>ppk30</i>  | Ark1/Prk1 family protein kinase Ppk30                            |                                                       | 3.38 |
| SPBC1271.05c  |               | short chain dehydrogenase (predicted)                            | short chain dehydrogenase                             | 3.37 |
| SPBC1706.03   |               | CIA30 family protein                                             | CIA30 family protein                                  | 3.37 |
| SPAC5D6.04    | <i>adl1</i>   | DNA ligase (predicted)                                           | DNA ligase (predicted)                                | 3.34 |
| SPAC19A8.12   |               | sequence orphan                                                  |                                                       | 3.34 |
| SPBC29A10.09c |               | vacuolar import and degradation protein Vid28                    | vacuolar import and degradation protein Vid28         | 3.33 |
| SPAPB1A10.12c |               | CAF1 family ribonuclease                                         |                                                       | 3.33 |
| SPAC12B10.05  | <i>sst6</i>   | ESCRT I complex subunit Vps23                                    | ESCRT I complex subunit Vps23                         | 3.33 |
| SPBC365.12c   |               | steroid oxidoreductase superfamily protein                       | steroid oxidoreductase superfamily protein            | 3.32 |
| SPAC2F3.05c   |               | malate dehydrogenase                                             | malate dehydrogenase                                  | 3.31 |
| SPAC1B9.02c   | <i>sro1</i>   | sequence orphan                                                  | sequence orphan                                       | 3.30 |
| SPAC513.03    |               | sequence orphan                                                  |                                                       | 3.29 |
| SPAC16A10.05c | <i>nbs1</i>   | Mre11 complex subunit Nbs1                                       |                                                       | 3.29 |
| SPAC869.03c   |               | sequence orphan                                                  | sequence orphan                                       | 3.29 |
| SPBC1921.07c  | <i>wtf20</i>  | wtf element Wtf20                                                | wtf element Wtf20                                     | 3.28 |
| SPBC337.15c   |               | guanine deaminase (predicted)                                    | guanine deaminase (predicted)                         | 3.28 |
| SPBC13E7.11   |               | WD repeat protein, human WDR68 family                            |                                                       | 3.27 |
| SPAC3C7.03c   | <i>wtf25</i>  | wtf element                                                      | wtf element                                           | 3.26 |
| SPBC30B4.02c  | <i>01-Oct</i> | mitochondrial intermediate peptidase Oct1 (predicted)            | mitochondrial intermediate peptidase Oct1 (predicted) | 3.26 |
| SPAC6G9.16c   | <i>ppk36</i>  | serine/threonine protein kinase Ppk36                            | serine/threonine protein kinase Ppk36                 | 3.25 |
| SPBC1A4.01    | <i>cut2</i>   | securin                                                          |                                                       | 3.25 |
| SPBC16A3.02c  |               | sequence orphan                                                  | sequence orphan                                       | 3.25 |
| SPAC1F3.03    |               | beclin family protein                                            |                                                       | 3.25 |
| SPBC29B5.02c  |               | DNAJ domain protein DNAJB family                                 | DNAJ domain protein DNAJB family                      | 3.23 |
| SPBC887.19    | <i>crk1</i>   | cyclin-dependent kinase activating kinase Crk1                   |                                                       | 3.23 |
| SPCC736.11    |               | CDP-diacylglycerol-glycerol-3-phosphate3-phosphatidyltransferase |                                                       | 3.23 |
| SPAC9.08c     | <i>Tf2-2</i>  | retrotransposable element                                        |                                                       | 3.23 |
| SPCC16C4.02c  |               | sequence orphan                                                  | sequence orphan                                       | 3.22 |
| SPAC29A4.17c  |               | ubiquitin-protein ligase E3 (predicted)                          | ubiquitin-protein ligase E3 (predicted)               | 3.21 |

|               |              |                                                             |                                                             |      |
|---------------|--------------|-------------------------------------------------------------|-------------------------------------------------------------|------|
| SPBP8B7.28c   |              | conserved protein (fungal and plant)                        | conserved protein (fungal and plant)                        | 3.20 |
| SPBC36.12c    | <i>etr1</i>  | enoyl-[acyl-carrier protein] reductase                      | enoyl-[acyl-carrier protein] reductase                      | 3.19 |
| SPAC16E8.16   | <i>mok13</i> | alpha-1,3-glucan synthase Mok13                             |                                                             | 3.19 |
| SPAPJ696.01c  |              | DUF726 family protein                                       | DUF726 family protein                                       | 3.19 |
| SPAC630.13c   |              | dihydrodiol dehydrogenase (predicted)                       | dihydrodiol dehydrogenase (predicted)                       | 3.19 |
| SPAC6G10.03c  |              | ubiquitin-protein ligase E3 (predicted)                     |                                                             | 3.18 |
| SPBC17D11.02c |              | cystathionine beta-lyase (predicted)                        | cystathionine beta-lyase (predicted)                        | 3.17 |
| SPAC6G9.06c   |              | sequence orphan                                             | sequence orphan                                             | 3.17 |
| SPBC19C7.09c  |              | DUF580 family protein                                       | DUF580 family protein                                       | 3.16 |
| SPBC365.05c   | <i>isa1</i>  | iron-sulfur protein Isa1                                    | iron-sulfur protein Isa1                                    | 3.16 |
| SPAC15A10.01  |              | protein phosphatase regulatory subunit Reg1 (predicted)     | protein phosphatase regulatory subunit Reg1 (predicted)     | 3.14 |
| SPAC3G9.02    | <i>pof9</i>  | F-box protein Pof9                                          |                                                             | 3.14 |
| SPAC1783.06c  | <i>gyp7</i>  | GTPase activating protein Gyp7 (predicted)                  | GTPase activating protein Gyp7 (predicted)                  | 3.14 |
| SPBP4H10.12   |              | S. pombe specific multicopy membrane protein family 1       | S. pombe specific multicopy membrane protein family 1       | 3.13 |
| SPAC19G12.09  |              | zf-C3HC4 type zinc finger                                   |                                                             | 3.12 |
| SPBC336.08    |              | conserved fungal protein                                    | conserved fungal protein                                    | 3.12 |
| SPBC725.13c   | <i>pxa1</i>  | PXA domain protein Pxa1                                     | PXA domain protein                                          | 3.11 |
| SPBC23G7.06c  |              | 5-formyltetrahydrofolate cyclo-ligase                       |                                                             | 3.11 |
| SPAC343.06c   |              | inosine-uridine preferring nucleoside hydrolase (predicted) | inosine-uridine preferring nucleoside hydrolase (predicted) | 3.10 |
| SPCC162.02c   |              | transthyretin (predicted)                                   | transthyretin (predicted)                                   | 3.10 |
| SPCC569.03    |              | sequence orphan                                             |                                                             | 3.10 |
| SPBPB7E8.02   |              | phosphomethylpyrimidine kinase (predicted)                  |                                                             | 3.09 |
| SPBC725.03    |              | proteasome regulatory particle, gankyrin (predicted)        | gankyrin                                                    | 3.09 |
| SPAC1805.16c  | <i>oma1</i>  | metallopeptidase Oma1 (predicted)                           | metallopeptidase Oma1 (predicted)                           | 3.09 |
| SPAC4H3.04c   | <i>png2</i>  | ING family homolog Png2                                     |                                                             | 3.08 |
| SPCC1183.03c  |              | mitochondrial ATPase inhibitor (predicted)                  | mitochondrial ATPase inhibitor (predicted)                  | 3.07 |
| SPAC1002.05c  | <i>eaf1</i>  | RNA polymerase II transcription elongation factor SpEAF     | RNA polymerase II transcription elongation factor SpEAF     | 3.07 |
| SPAC1D4.03c   |              | L-asparaginase (predicted)                                  | L-asparaginase (predicted)                                  | 3.06 |
| SPAC17A2.15   |              | ABC1 kinase family protein                                  |                                                             | 3.06 |

|               |               |                                                              |                                                  |      |
|---------------|---------------|--------------------------------------------------------------|--------------------------------------------------|------|
| SPAC4D7.02c   | <i>sam50</i>  | SAM complex subunit Sam50 (predicted)                        | SAM complex subunit Sam50 (predicted)            | 3.03 |
| SPAC20G4.03c  | <i>atf21</i>  | transcription factor Atf21                                   |                                                  | 3.03 |
| SPAC17H9.19c  | <i>hmt1</i>   | ATP-binding cassette-type vacuolar membrane transporter Hmt1 |                                                  | 3.02 |
| SPBC32C12.02  | <i>nep2</i>   | NEDD8 protease Nep2                                          |                                                  | 3.02 |
| SPCC970.11c   |               | conserved eukaryotic protein                                 |                                                  | 3.02 |
| SPCC645.05c   | <i>glo1</i>   | glyoxalase I                                                 |                                                  | 3.02 |
| SPBC27B12.01c | <i>thi5</i>   | transcription factor Thi5                                    | transcription factor Thi5                        | 3.00 |
| SPCC622.07    |               | phosphomethylpyrimidine kinase (predicted)                   | phosphomethylpyrimidine kinase (predicted)       | 3.00 |
| SPAPB8E5.04c  |               | UbiE family methyltransferase (predicted)                    | UbiE family methyltransferase (predicted)        | 3.00 |
| SPCC737.09c   |               | cysteine transporter (predicted)                             | cysteine transporter (predicted)                 | 3.00 |
| SPAC1687.22c  | <i>mug135</i> | DUF1773 family protein 3                                     | DUF1773 family protein 3                         | 2.99 |
| SPBP35G2.14   | <i>oca2</i>   | serine/threonine protein kinase Oca2 (predicted)             | serine/threonine protein kinase Oca2 (predicted) | 2.99 |
| SPCC63.03     | <i>fsv1</i>   | SNARE Fsv1                                                   | SNARE Fsv1                                       | 2.98 |
| SPBC3H7.13    |               | sequence orphan                                              | sequence orphan                                  | 2.98 |
| SPAC16A10.06c | <i>rum1</i>   | CDK inhibitor Rum1                                           |                                                  | 2.98 |
| SPBC12C2.10c  | <i>mam1</i>   | M-factor transporter Mam1                                    |                                                  | 2.97 |
| SPAC6B12.03c  |               | sequence orphan                                              |                                                  | 2.97 |
| SPAC4G9.12    |               | sequence orphan                                              |                                                  | 2.97 |
| SPAC1B3.11c   | <i>atm1</i>   | ABC family iron transporter Atm1                             | ABC family iron transporter Atm1                 | 2.97 |
| SPAC23H3.03c  |               | GTPase activating protein (predicted)                        | GTPase activating protein (predicted)            | 2.96 |
| SPBC20F10.07  |               | Usp (universal stress protein) family protein                |                                                  | 2.96 |
| SPAC25G10.01  |               | CCR4-Not complex subunit Caf4/Mdv1 (predicted)               | CCR4-Not complex subunit Caf4/Mdv1 (predicted)   | 2.96 |
| SPBC405.05    |               | aminotransferase class-III                                   | 2,2-dialkylglycine decarboxylase (predicted)     | 2.96 |
| SPAC1D4.12    |               | NAD/NADH kinase (predicted)                                  | NAD/NADH kinase                                  | 2.95 |
| SPAC17C9.11c  | <i>ell1</i>   | RNA polymerase II transcription elongation factor SpELL      |                                                  | 2.95 |
| SPCC569.06    |               | MFS family transmembrane transporter Mfs1                    | MFS family transmembrane transporter Mfs1        | 2.94 |
| SPCC285.09c   | <i>pub2</i>   | ubiquitin-protein ligase Pub2                                | ubiquitin-protein ligase Pub2                    | 2.94 |
| SPAC2G11.04   | <i>puf3</i>   | RNA-binding protein Puf3 (predicted)                         |                                                  | 2.94 |

|              |               |                                                   |                                                 |      |
|--------------|---------------|---------------------------------------------------|-------------------------------------------------|------|
| SPCC1235.04c | <i>moa1</i>   | meiotic cohesin complex associated protein Moa1   | meiotic cohesin complex associated protein Moa1 | 2.94 |
| SPBC776.06c  |               | hypothetical protein                              | hypothetical protein                            | 2.94 |
| SPCC285.04   | <i>mkh1</i>   | MEK kinase (MEKK) Mkh1                            | MEK kinase (MEKK) Mkh1 (PMID 9199286)           | 2.94 |
| SPBC19F8.07  | <i>gcn2</i>   | eIF2 alpha kinase Gcn2 (predicted)                | eIF2 alpha kinase Gcn2 (predicted)              | 2.93 |
| SPAC4F8.01   |               | conserved fungal protein                          |                                                 | 2.92 |
| SPBC1289.06c |               | conserved protein (fungal and plant)              | conserved protein (fungal and plant)            | 2.92 |
| SPCC162.12   | <i>cuf2</i>   | Cu metalloregulatory transcription factor Cuf2    | Cu metalloregulatory transcription factor Cuf2  | 2.92 |
| SPAC15E1.10  |               | dubious                                           |                                                 | 2.90 |
| SPCC1183.09c |               | arrestin Aly1 related                             | arrestin Aly1 related                           | 2.90 |
| SPAC17A2.09c |               | autophagy associated protein Atg24 (predicted)    | autophagy associated protein Atg24              | 2.89 |
| SPAC3H5.11   | <i>wtf13</i>  | wtf element Wtf13                                 | wtf element Wtf13                               | 2.89 |
| SPAC6F12.03c | <i>phx1</i>   | homeobox transcription factor Phx1                | homeobox transcription factor Phx1              | 2.89 |
| SPAP14E8.04  |               | sequence orphan                                   | sequence orphan                                 | 2.88 |
| SPBC1348.12  |               | dubious                                           | dubious                                         | 2.88 |
| SPBC1703.09  |               | RNA-binding protein                               | RNA-binding protein                             | 2.88 |
| SPAC19A8.02  | <i>wtf5</i>   | wtf element Wtf5                                  | wtf element Wtf5                                | 2.87 |
| SPBC19F8.06c | <i>atg9</i>   | autophagy associated protein Atg9 (predicted)     |                                                 | 2.86 |
| SPAC16E8.09  |               | sequence orphan                                   | sequence orphan                                 | 2.86 |
| SPAC29E6.09  | <i>arz1</i>   | armadillo repeat containing, Zfs1 target number 1 | sequence orphan                                 | 2.85 |
| SPBC947.15c  |               | sequence orphan                                   | sequence orphan                                 | 2.85 |
| SPBC16G5.07c | <i>msa1</i>   | RNA-binding protein Msa1                          | RNA-binding protein Msa1                        | 2.84 |
| SPAC12G12.12 | <i>wtf16</i>  | wtf element Wtf16                                 | wtf element Wtf16                               | 2.84 |
| SPAC824.05   | <i>dma1</i>   | mitotic spindle checkpoint protein Dma1           | mitotic spindle checkpoint protein Dma1         | 2.83 |
| SPBC1773.16c |               | RNA-binding protein                               | RNA-binding protein                             | 2.83 |
| SPBC21C3.20c |               | Lgl family protein                                | Lgl family protein                              | 2.83 |
| SPBC1289.15  | <i>pdh1</i>   | DUF1751 family protein                            | DUF1751 family protein                          | 2.83 |
| SPAC513.02   |               | DUF1212 family protein                            | DUF1212 family protein                          | 2.83 |
| SPBC1685.14c |               | GFO/IDH/MocA family oxidoreductase                | GFO/IDH/MocA family oxidoreductase              | 2.83 |
| SPAC57A10.06 | <i>mug121</i> | sequence orphan                                   | sequence orphan                                 | 2.83 |
| SPAC4F8.10c  |               | zf-CCCH type zinc finger protein                  | zf-CCCH type zinc finger protein                | 2.82 |



|               |               |                                                                                         |                                                                                         |      |
|---------------|---------------|-----------------------------------------------------------------------------------------|-----------------------------------------------------------------------------------------|------|
| SPAC10F6.13c  |               | glutathione-dependent formaldehyde dehydrogenase (predicted)                            | glutathione-dependent formaldehyde dehydrogenase (predicted)                            | 2.81 |
| SPCC1840.09   | <i>nta1</i>   | protein N-terminal amidase Nta1 (predicted)                                             |                                                                                         | 2.81 |
| SPAC806.04c   |               | P-type ATPase                                                                           | P-type ATPase (PMID 12707717)                                                           | 2.79 |
| SPAC24C9.14   | <i>rav1</i>   | RAVE complex subunit Rav1 (predicted)                                                   |                                                                                         | 2.79 |
| SPAC23C4.07   | <i>spd1</i>   | ribonucleotide reductase (RNR) inhibitor                                                | ribonucleotide reductase (RNR) inhibitor                                                | 2.78 |
| SPAC3C7.13c   | <i>mug98</i>  | sequence orphan                                                                         |                                                                                         | 2.78 |
| SPCC645.02    |               | amino acid permease, unknown 1                                                          | amino acid permease, unknown 1                                                          | 2.77 |
| SPAC19B12.08  | <i>xlfi</i>   | xrcc4 like factor                                                                       | xrcc4 like factor                                                                       | 2.77 |
| SPBC1105.14   | <i>gpx1</i>   | glutathione peroxidase Gpx1                                                             |                                                                                         | 2.75 |
| SPAC23G3.03   |               | R3H and G-patch domain, implicated in splicing                                          |                                                                                         | 2.75 |
| SPAC24C9.08   |               | dubious                                                                                 | dubious                                                                                 | 2.75 |
| SPAC5H10.02c  |               | S. pombe specific UPF0300 family protein 6                                              | S. pombe specific UPF0300 family protein 6                                              | 2.75 |
| SPAC22F3.05c  | <i>git11</i>  | heterotrimeric G protein gamma subunit Git11                                            |                                                                                         | 2.74 |
| SPAC21E11.04  |               | GTPase activating protein                                                               |                                                                                         | 2.74 |
| SPBC1604.03c  |               | mitochondrial copper chaperone                                                          | mitochondrial copper ion transport protein                                              | 2.73 |
| SPBC1703.08c  | <i>clr1</i>   | cryptic loci regulator Clr1                                                             |                                                                                         | 2.73 |
| SPCC965.11c   | <i>01-Sep</i> | fork head transcription factor Sep1                                                     |                                                                                         | 2.72 |
| SPAC1527.02   | <i>coq7</i>   | ubiquinone biosynthesis protein Coq7                                                    |                                                                                         | 2.72 |
| SPBC31F10.10c | <i>alg13</i>  | N-acetylglucosaminyldiphosphodolichol N-acetylglucosaminyltransferase Alg13 (predicted) | N-acetylglucosaminyldiphosphodolichol N-acetylglucosaminyltransferase Alg13 (predicted) | 2.72 |
| SPAC29A4.06c  |               | pseudo                                                                                  |                                                                                         | 2.72 |
| SPAC23A1.14c  | <i>kin1</i>   | microtubule affinity-regulating kinase Kin1                                             |                                                                                         | 2.72 |
| SPAC1002.17c  | <i>frp1</i>   | ferric-chelate reductase Frp1                                                           | ferric-chelate reductase Frp1                                                           | 2.72 |
| SPBC15D4.02   |               | dubious                                                                                 | dubious                                                                                 | 2.72 |
| SPAC25B8.09   |               | autophagy C terminal domain family protein                                              | autophagy C terminal domain family protein                                              | 2.71 |
| SPAC17G6.04c  |               | conserved fungal protein                                                                |                                                                                         | 2.71 |
| SPAC824.02    |               | fasciclin domain protein (3)                                                            | fasciclin domain protein (3)                                                            | 2.71 |
| SPAC227.17c   |               | sequence orphan                                                                         | sequence orphan                                                                         | 2.70 |

|               |                |                                                                   |                                                   |      |
|---------------|----------------|-------------------------------------------------------------------|---------------------------------------------------|------|
| SPAC222.13c   |                | aminopeptidase (predicted)                                        | aspartyl aminopeptidase (predicted)               | 2.70 |
| SPBC16E9.03c  |                | DUF544 family protein                                             | DUF544 family protein                             | 2.69 |
| SPBC776.18c   | <i>ppk19</i>   | serine/threonine protein kinase Ppk19                             |                                                   | 2.69 |
| SPCC794.01c   | <i>nca2</i>    | mitochondrial protein Nca2 (predicted)                            | mitochondrial protein Nca2 (predicted)            | 2.69 |
| SPBPB2B2.18   | <i>tfg2</i>    | transcription factor TFIIIF complex beta subunit Tfg2 (predicted) |                                                   | 2.69 |
| SPAPB1A10.02  | <i>mug24</i>   | RNA-binding protein, rrm type                                     | RNA-binding protein                               | 2.69 |
| SPBC27B12.04c | <i>rec12</i>   | endonuclease Rec12                                                | endonuclease Rec12                                | 2.69 |
| SPBC8D2.01    |                | mannan endo-1,6-alpha-mannosidase (predicted)                     | mannan endo-1,6-alpha-mannosidase (predicted)     | 2.68 |
| SPCC188.08c   |                | Nudix family hydrolase                                            | Nudix family hydrolase                            | 2.68 |
| SPAC3A11.14c  | <i>ppk15</i>   | serine/threonine protein kinase Ppk15 (predicted)                 | serine/threonine protein kinase Ppk15 (predicted) | 2.68 |
| SPCC1739.10   |                | sequence orphan                                                   | sequence orphan                                   | 2.67 |
| SPBC21D10.06c |                | glutamate N-acetyltransferase (predicted)                         | glutamate N-acetyltransferase (predicted)         | 2.67 |
| SPAC1002.12c  | <i>rst2</i>    | transcription factor Rst2                                         | transcription factor Rst2                         | 2.67 |
| SPBC405.02c   |                | acyl-coA-sterol acyltransferase (predicted)                       | acyl-coA-sterol acyltransferase (predicted)       | 2.67 |
| SPCC594.04c   |                | AAA family ATPase, unknown biological role                        | AAA family ATPase, unknown biological role        | 2.66 |
| SPAC25B8.19c  |                | cardiolipin synthase/ hydrolase fusion protein (predicted)        | cardiolipin synthase (predicted)                  | 2.66 |
| SPAC32A11.02c |                | auxin family transmembrane transporter (predicted)                | auxin family                                      | 2.66 |
| SPBPB2B2.10c  | <i>matmc_1</i> | mating-type m-specific polypeptide mc                             |                                                   | 2.65 |
| SPBC16H5.13   | <i>ppk34</i>   | serine/threonine protein kinase Ppk34                             | serine/threonine protein kinase Ppk34             | 2.65 |
| SPBC215.04    | <i>mug186</i>  | sorting nexin Snx41                                               |                                                   | 2.65 |
| SPCC1020.03   |                | TLDc domain protein 2                                             |                                                   | 2.64 |
| SPBC3B8.10c   |                | DUF1783 family protein                                            |                                                   | 2.64 |
| SPAC458.04c   |                | beta-glucosidase Psu2 (predicted)                                 |                                                   | 2.64 |
| SPAC1F7.12    | <i>mug161</i>  | CwfJ family protein                                               | CwfJ family protein                               | 2.64 |
| SPAC343.17c   | <i>pkd2</i>    | TRP-like ion channel                                              | TRP-like ion channel (PMID 15537393)              | 2.64 |
| SPAC186.06    |                | phospholipase (predicted)                                         | phospholipase                                     | 2.63 |
| SPBC1604.18c  |                | calcium permease (predicted)                                      | calcium permease (predicted)                      | 2.63 |
| SPBC354.13    | <i>hse1</i>    | STAM like protein Hse1                                            |                                                   | 2.63 |
| SPBC582.10c   | <i>wee1</i>    | dual specificity protein kinase Wee1                              | dual specificity protein kinase Wee1              | 2.63 |
| SPAC13C5.06c  |                | carboxyl methyl esterase                                          |                                                   | 2.63 |

|               |              |                                                        |                                                        |      |
|---------------|--------------|--------------------------------------------------------|--------------------------------------------------------|------|
| SPCC364.04c   |              | L-asparaginase (predicted)                             | L-asparaginase                                         | 2.62 |
| SPBC27.03     |              | membrane transporter                                   | membrane transporter                                   | 2.61 |
| SPCC1442.01   |              | GPI inositol deacylase                                 | GPI inositol deacylase                                 | 2.61 |
| SPBC32H8.07   |              | purine nucleoside phosphorylase (predicted)            | purine nucleoside phosphorylase (predicted)            | 2.61 |
| SPBC365.20c   |              | conserved fungal protein                               | conserved fungal protein                               | 2.61 |
| SPAC25A8.02   | <i>cds1</i>  | replication checkpoint kinase Cds1                     | replication checkpoint kinase Cds1                     | 2.60 |
| SPAC343.03    | <i>psp3</i>  | serine protease Psp3 (predicted)                       | serine protease Psp3 (predicted)                       | 2.60 |
| SPAC9.13c     |              | sequence orphan                                        | sequence orphan                                        | 2.60 |
| SPAC1B3.15c   |              | dubious                                                | dubious                                                | 2.60 |
| SPAC19E9.03   |              | sequence orphan                                        | sequence orphan                                        | 2.59 |
| SPAC869.10c   |              | C2 domain protein                                      | C2 domain protein                                      | 2.59 |
| SPCC1919.01   |              | sequence orphan                                        |                                                        | 2.59 |
| SPAC4F10.16c  |              | SAGA complex subunit Sgf73 (predicted)                 | SAGA complex subunit Sgf73 (predicted)                 | 2.59 |
| SPBC29A10.02  | <i>rhp55</i> | RecA family ATPase Rhp55                               | RecA family ATPase Rhp55                               | 2.59 |
| SPAPB1A10.07c | <i>ght7</i>  | hexose transporter Ght7                                | hexose transporter Ght7                                | 2.58 |
| SPAC2G11.13   |              | amino acid permease, unknown 13                        | amino acid permease, unknown 13                        | 2.58 |
| SPBC16C6.04   | <i>wtf12</i> | wtf element Wtf12                                      | wtf element Wtf12                                      | 2.58 |
| SPBC3H7.03c   |              | SPX/EXS domain protein                                 | SPX/EXS domain protein                                 | 2.58 |
| SPBC30D10.03c |              | ribonuclease II (RNB) family                           | ribonuclease II (RNB) family                           | 2.57 |
| SPAC19A8.03   |              | nucleoside diphosphate-sugar hydrolase (predicted)     |                                                        | 2.57 |
| SPAC15E1.07c  | <i>aut12</i> | autophagy associated protein Aut12 (predicted)         | autophagy associated protein Aut12                     | 2.57 |
| SPBC8E4.05c   |              | transcription factor (predicted)                       |                                                        | 2.57 |
| SPAC11E3.14   | <i>klf1</i>  | conserved fungal protein                               | conserved fungal protein                               | 2.56 |
| SPBC32H8.02c  |              | aromatic ring-opening dioxygenase (predicted)          |                                                        | 2.56 |
| SPCC548.02c   |              | haloacid dehalogenase-like hydrolase                   |                                                        | 2.56 |
| SPAC14C4.01c  |              | conserved eukaryotic protein                           |                                                        | 2.55 |
| SPCC1739.04c  |              | methionine-tRNA ligase, mitochondrial                  | methionine-tRNA ligase                                 | 2.55 |
| SPCC285.07c   |              | hydroxyacid dehydrogenase (predicted)                  | hydroxyacid dehydrogenase (predicted)                  | 2.55 |
| SPCC1223.02   | <i>ptc1</i>  | protein phosphatase 2C Ptc1                            | protein phosphatase 2C Ptc1                            | 2.55 |
| SPBC3B9.10    | <i>zip1</i>  | transcription factor Zip1                              | transcription factor Zip1                              | 2.55 |
| SPBC337.02c   | <i>pcm2</i>  | protein-L-isoaspartate O-methyltransferase (predicted) | protein-L-isoaspartate O-methyltransferase (predicted) | 2.55 |
| SPCC4B3.16    | <i>pep1</i>  | sorting receptor for CPY                               |                                                        | 2.55 |

|               |               |                                                      |                                            |      |
|---------------|---------------|------------------------------------------------------|--------------------------------------------|------|
| SPAC6F12.02   |               | kinesin-like protein                                 |                                            | 2.54 |
| SPCC338.18    | <i>atf1</i>   | transcription factor Atf1                            |                                            | 2.54 |
| SPBC1773.06c  | <i>pms1</i>   | MutL family mismatch-repair protein Pms1             | MutL family mismatch-repair protein Pms1   | 2.53 |
| SPAC922.03    |               | human down-regulated in multiple cancers-1 homolog 2 |                                            | 2.53 |
| SPAC25B8.08   |               | ribonuclease II (RNB) family                         |                                            | 2.53 |
| SPCC1795.01c  |               | pseudogene                                           |                                            | 2.53 |
| SPCC70.08c    |               | conserved fungal protein                             | conserved fungal protein                   | 2.53 |
| SPAC29B12.13  |               | C2 domain protein                                    | C2 domain protein                          | 2.52 |
| SPAC589.08c   |               | phospholipase (predicted)                            | phospholipase (predicted)                  | 2.52 |
| SPBC725.10    | <i>wtf9</i>   | wtf element, Wtf2, pseudo                            | wtf element, Wtf2, pseudo                  | 2.52 |
| SPAC2C4.17c   | <i>pof14</i>  | F-box protein Pof14                                  | F-box protein Pof14                        | 2.52 |
| SPBPB21E7.05  | <i>wtf1</i>   | wtf element Wtf1, pseudo                             |                                            | 2.51 |
| SPAC22G7.08   | <i>sfp1</i>   | transcription factor Sfp1 (predicted)                | transcription factor Sfp1 (predicted)      | 2.51 |
| SPAPJ760.02c  |               | RNA-binding protein, rrm type                        |                                            | 2.51 |
| SPBC215.03c   |               | pyruvate dehydrogenase protein x component           | pyruvate dehydrogenase protein x component | 2.51 |
| SPAC16A10.08c |               | mitochondrial hydrolase (predicted)                  | mitochondrial hydrolase                    | 2.51 |
| SPCC663.03    |               | dubious                                              | dubious                                    | 2.50 |
| SPBC20F10.05  | <i>sib2</i>   | ornithine N5 monooxygenase (predicted)               | ornithine N5 monooxygenase (predicted)     | 2.50 |
| SPAC17G6.12   |               | zinc finger protein                                  |                                            | 2.50 |
| SPBC17A3.03c  |               | BRO1 domain protein                                  | BRO1 domain protein                        | 2.50 |
| SPCP20C8.01c  | <i>byr2</i>   | MAP kinase kinase kinase Byr2                        |                                            | 2.50 |
| SPCPB16A4.05c | <i>mug179</i> | WD repeat protein Mug179                             | WD repeat protein Mug179                   | 2.50 |
| SPAC1687.09   | <i>kms1</i>   | meiotic spindle pole body protein Kms1               | meiotic spindle pole body protein Kms1     | 2.50 |
| SPBC651.02    |               | transcription factor (predicted)                     | transcription factor (predicted)           | 2.49 |
| SPACUNK4.08   |               | transcription factor (predicted)                     | transcription factor (predicted)           | 2.49 |
| SPAC4G9.11c   | <i>alp41</i>  | ADP-ribosylation factor Alp41                        | ADP-ribosylation factor Alp41              | 2.49 |
| SPAC2F3.16    | <i>sib1</i>   | ferrichrome synthetase Sib1                          | ferrichrome synthetase Sib1                | 2.49 |
| SPCC576.04    | <i>ubx4</i>   | UBX domain protein Ubx4 (predicted)                  |                                            | 2.48 |
| SPAPB15E9.02c |               | conserved fungal protein                             | conserved fungal protein                   | 2.48 |
| SPBC887.15c   | <i>uve1</i>   | endonuclease Uve1                                    |                                            | 2.48 |
| SPCC548.03c   |               | HVA22/TB2/DP1 family protein                         |                                            | 2.48 |
| SPAC4D7.11    | <i>wtf2</i>   | wtf element Wtf2, pseudo                             |                                            | 2.48 |

|               |              |                                                                      |                                                                      |      |
|---------------|--------------|----------------------------------------------------------------------|----------------------------------------------------------------------|------|
| SPAC20H4.11c  |              | abhydrolase family protein, unknown biological role                  | abhydrolase family protein, unknown biological role                  | 2.48 |
| SPCC1672.03c  |              | ubiquitin family, human C1ORF55 related                              | ubiquitin family, human C1ORF55 related                              | 2.48 |
| SPBC32F12.15  |              | ubiquitin-like conjugating enzyme                                    |                                                                      | 2.48 |
| SPAC22F3.12c  | <i>cox10</i> | protoheme IX farnesyltransferase                                     |                                                                      | 2.47 |
| SPBC23E6.09   |              | hydroxyacylglutathione hydrolase (predicted)                         | hydroxyacylglutathione hydrolase (predicted)                         | 2.47 |
| SPAC1F8.03c   |              | MatE family transporter                                              | MatE family transporter                                              | 2.47 |
| SPAC212.06c   |              | glutamate-1-semialdehyde 2,1-aminomutaseaminotransferase (predicted) | glutamate-1-semialdehyde 2,1-aminomutaseaminotransferase (predicted) | 2.47 |
| SPAC2F7.06c   | <i>rft1</i>  | Man5GlcNac2-PP-Dol translocation protein Rft1                        |                                                                      | 2.46 |
| SPAC11D3.17   | <i>psk1</i>  | serine/threonine protein kinase Psk1                                 | serine/threonine protein kinase Psk1                                 | 2.46 |
| SPAC1F8.05    |              | tripeptidylpeptidase (predicted)                                     | tripeptidylpeptidase (predicted)                                     | 2.45 |
| SPAC13A11.04c |              | dubious                                                              | sequence orphan                                                      | 2.45 |
| SPBC1709.14   | <i>ctt1</i>  | catalase                                                             | catalase                                                             | 2.44 |
| SPBP8B7.26    | <i>med15</i> | mediator complex subunit Med15 (predicted)                           | mediator complex subunit Med15 (predicted)                           | 2.44 |
| SPAC1399.02   |              | conserved fungal family                                              | conserved fungal family                                              | 2.44 |
| SPCC63.08c    |              | sterol binding ankyrin repeat protein                                |                                                                      | 2.44 |
| SPCC1672.06c  |              | D-amino acid oxidase (predicted)                                     | D-amino acid oxidase (predicted)                                     | 2.43 |
| SPAC19G12.02c |              | conserved fungal protein                                             |                                                                      | 2.43 |
| SPAC20H4.09   | <i>spc24</i> | spindle pole body protein Spc24                                      |                                                                      | 2.43 |
| SPCC1672.04c  |              | sequence orphan                                                      |                                                                      | 2.42 |
| SPAC823.09c   | <i>dam1</i>  | DASH complex subunit Dam1                                            | DASH complex subunit Dam1                                            | 2.42 |
| SPBC13E7.02   | <i>php2</i>  | CCAAT-binding factor complex subunit Php2                            |                                                                      | 2.42 |
| SPCC320.09    |              | NST UDP-galactose transporter (predicted)                            | NST UDP-galactose transporter                                        | 2.42 |
| SPBC543.04    |              | ubiquitin-protein ligase E3 (predicted)                              | ubiquitin-protein ligase E3 (predicted)                              | 2.42 |
| SPBC725.11c   | <i>vps26</i> | retromer complex subunit Vps26                                       | retromer complex subunit Vps26                                       | 2.41 |
| SPAC4G8.11c   |              | cytochrome c heme lyase                                              |                                                                      | 2.41 |
| SPAC6B12.07c  |              | trans-aconitate 3-methyltransferase (predicted)                      | trans-aconitate 3-methyltransferase (predicted)                      | 2.41 |
| SPAC4H3.03c   | <i>mug35</i> | sequence orphan                                                      | sequence orphan                                                      | 2.41 |
| SPBC1271.07c  | <i>vps35</i> | retromer complex subunit Vps35                                       | retromer complex subunit Vps35                                       | 2.41 |

|               |              |                                                              |                                                         |      |
|---------------|--------------|--------------------------------------------------------------|---------------------------------------------------------|------|
| SPBC16A3.17c  |              | sulfate transporter (predicted)                              | sulfate transporter (predicted)                         | 2.41 |
| SPAC458.03    | <i>ght5</i>  | hexose transporter Ght5                                      | hexose transporter Ght5 (PMID 10735857)                 | 2.40 |
| SPCC4G3.03    |              | mitochondrial matrix protein import protein                  |                                                         | 2.40 |
| SPBC19F5.01c  |              | ubiquitin-protein ligase E3 (predicted)                      | ubiquitin-protein ligase E3 (predicted)                 | 2.40 |
| SPBC1271.08c  | <i>pep12</i> | SNARE Pep12                                                  | SNARE Pep12                                             | 2.40 |
| SPBC25H2.03   |              | UDP-GlcNAc transferase associated protein Alg14              | UDP-GlcNAc transferase associated protein Alg14         | 2.40 |
| SPAPB24D3.04c |              |                                                              |                                                         | 2.39 |
| SPAC22H12.03  | <i>cbf12</i> | CBF1/Su(H)/LAG-1 family transcription factor Cbf12           | transcription factor (predicted)                        | 2.39 |
| SPAC26H5.04   |              | sequence orphan                                              | sequence orphan                                         | 2.39 |
| SPBC15D4.01c  | <i>stn1</i>  | telomere cap complex subunit Stn1                            |                                                         | 2.39 |
| SPAC1B3.04c   | <i>ubp9</i>  | ubiquitin C-terminal hydrolase Ubp9                          | ubiquitin C-terminal hydrolase Ubp9                     | 2.38 |
| SPAC1296.04   | <i>alp21</i> | tubulin specific chaperone cofactor E                        | tubulin specific chaperone cofactor E                   | 2.38 |
| SPAC328.03    |              | fructose-2,6-bisphosphate 2-phosphatase activity (predicted) | 6-phosphofructo-2-kinase (predicted)                    | 2.37 |
| SPAC8C9.16c   |              | RCC domain protein Ats1 (predicted)                          | RCC domain protein Ats1 (predicted)                     | 2.36 |
| SPCC61.03     |              | 1-aminocyclopropane-1-carboxylate deaminase (predicted)      | 1-aminocyclopropane-1-carboxylate deaminase (predicted) | 2.36 |
| SPAC23H3.12c  |              | peptide methionine sulfoxide reductase (predicted)           | peptide methionine sulfoxide reductase (predicted)      | 2.36 |
| SPAC10F6.11c  | <i>ubp21</i> | ubiquitin C-terminal hydrolase Ubp21                         |                                                         | 2.36 |
| SPAC14C4.10c  | <i>wtf11</i> | wtf element Wtf11                                            | wtf element Wtf11                                       | 2.36 |
| SPCC1393.07c  |              | autophagy associated kinase activator (predicted)            | kinase activator (predicted)                            | 2.36 |
| SPCC16A11.08  | <i>ssn6</i>  | transcriptional corepressor Ssn6                             |                                                         | 2.35 |
| SPMIT.08      |              | heavy metal ion homeostasis protein (predicted)              | heavy metal ion homeostasis protein (predicted)         | 2.35 |
| SPBC1778.02   |              | S. pombe specific GPI anchored protein family 1              | S. pombe specific GPI anchored protein family 1         | 2.35 |
| SPBC19F8.03c  |              | ubiquitin-protein ligase E3 (predicted)                      |                                                         | 2.35 |
| SPBC11G11.01  |              | transcription related zf-ZZ type zinc finger protein         |                                                         | 2.34 |
| SPAC1039.10   |              | sequence orphan                                              | sequence orphan                                         | 2.34 |
| SPCC1827.07c  |              | alanine racemase (predicted)                                 | alanine racemase (predicted)                            | 2.34 |
| SPBPB2B2.02   | <i>hsr1</i>  | transcription factor Hsr1                                    | transcription factor Hsr1                               | 2.34 |

|               |               |                                                        |                                               |      |
|---------------|---------------|--------------------------------------------------------|-----------------------------------------------|------|
| SPAC24C9.07c  |               | mitochondrial NAD <sup>+</sup> transporter (predicted) | mitochondrial NAD <sup>+</sup> transporter    | 2.33 |
| SPBC16C6.02c  |               | Ran GTPase binding protein (predicted)                 | Ran GTPase binding protein (predicted)        | 2.33 |
| SPBC146.12    |               | short chain dehydrogenase (predicted)                  | short chain dehydrogenase (predicted)         | 2.33 |
| SPBC25B2.10   |               | mitochondrial rhomboid protease                        |                                               | 2.33 |
| SPAC922.07c   |               | haloacid dehalogenase-like hydrolase                   | haloacid dehalogenase-like hydrolase          | 2.32 |
| SPAC977.04    |               | human family 32A homolog                               | human family 32A homolog                      | 2.32 |
| SPBC725.02    |               | nicotinamide riboside kinase (predicted)               | nicotinamide riboside kinase                  | 2.32 |
| SPAC25B8.13c  | <i>sec74</i>  | guanyl-nucleotide exchange factor Sec74                |                                               | 2.32 |
| SPAC1039.08   |               | ATP-dependent DNA helicase Rhp16b (predicted)          | ATP-dependent DNA helicase Rhp16b (predicted) | 2.32 |
| SPCC584.02    | <i>cyr1</i>   | adenylate cyclase                                      |                                               | 2.32 |
| SPBC3H7.06c   |               | inositol metabolism protein Opi10 (predicted)          |                                               | 2.31 |
| SPAC3F10.10c  | <i>pik3</i>   | phosphatidylinositol 3-kinase Pik3                     | phosphatidylinositol 3-kinase Pik3            | 2.31 |
| SPAC1565.03   |               | phosphoprotein phosphatase (predicted)                 |                                               | 2.31 |
| SPAPB18E9.02c |               | xylose and arabinose reductase (predicted)             | xylose and arabinose reductase (predicted)    | 2.31 |
| SPAC16C9.01c  | <i>wtf15</i>  | wtf element Wtf15, pseudo                              | wtf element Wtf15, pseudo                     | 2.31 |
| SPBC691.01    | <i>mug130</i> | sequence orphan                                        | sequence orphan                               | 2.31 |
| SPAC1039.11c  | <i>cul1</i>   | cullin 1                                               | cullin 1                                      | 2.31 |
| SPBC21C3.12c  |               | conserved eukaryotic protein                           | conserved eukaryotic protein                  | 2.30 |
| SPBC4B4.10c   | <i>byr1</i>   | MAP kinase kinase Byr1                                 | MAP kinase kinase Byr1                        | 2.30 |
| SPCC663.17    |               | dubious                                                | dubious                                       | 2.30 |
| SPCC31H12.06  |               | conserved fungal protein                               | conserved fungal protein                      | 2.30 |
| SPBC660.08    | <i>vps3</i>   | GTPase regulator Vps3 (predicted)                      | GTPase regulator Vps3 (predicted)             | 2.30 |
| SPBPB21E7.07  |               | sequence orphan                                        | sequence orphan                               | 2.30 |
| SPAC1782.12c  |               | nicotinamidase (predicted)                             |                                               | 2.29 |
| SPAC6G10.06   |               | ubiquitin-protein ligase E3 (predicted)                |                                               | 2.29 |
| SPBPB2B2.12c  |               | prohibitin (predicted)                                 |                                               | 2.29 |
| SPBC887.16    | <i>pof13</i>  | F-box protein Pof13                                    | F-box protein Pof13                           | 2.28 |
| SPBC25B2.02c  | <i>cut9</i>   | anaphase-promoting complex subunit Cut9                | anaphase-promoting complex subunit Cut9       | 2.28 |
| SPAC3A11.09   | <i>atg2</i>   | autophagy associated protein Mug36                     | autophagy associated protein Mug36            | 2.28 |
| SPBC12C2.04   |               | WD repeat protein, human IQWD1 family                  |                                               | 2.28 |

|               |                |                                                                                                           |                                                                              |      |
|---------------|----------------|-----------------------------------------------------------------------------------------------------------|------------------------------------------------------------------------------|------|
| SPBC713.07c   |                | transcription factor TFIIIB                                                                               | transcription factor TFIIIB (PMID 12359329)                                  | 2.28 |
| SPBC30D10.14  |                | 2-oxoglutarate dehydrogenase (lipoamide) (e1 component of oxoglutarate dehydrogenase complex) (predicted) |                                                                              | 2.28 |
| SPAC1F8.02c   |                | vacuolar polyphosphatase (predicted)                                                                      |                                                                              | 2.28 |
| SPCC550.10    | <i>mpr1</i>    | response regulator phosphotransferase                                                                     |                                                                              | 2.27 |
| SPAC13D6.01   | <i>pmc3</i>    | mediator complex subunit Pmc3 (pers. comm. Tomas Linder, from PMID 10625684)                              | mediator complex subunit Pmc3 (pers. comm. Tomas Linder, from PMID 10625684) | 2.27 |
| SPCC1442.05c  |                | sequence orphan                                                                                           | sequence orphan                                                              | 2.27 |
| SPAC521.03    | <i>mug2</i>    | DUF1773 family protein 1                                                                                  | DUF1773 family protein 1                                                     | 2.27 |
| SPAC25B8.04c  | <i>nup131</i>  | nucleoporin Nup131                                                                                        |                                                                              | 2.27 |
| SPCC1442.04c  |                | membrane transporter                                                                                      |                                                                              | 2.27 |
| SPBC336.12c   | <i>rhp7</i>    | Rad7 homolog Rhp7                                                                                         |                                                                              | 2.26 |
| SPBC27B12.05  |                | zf-MYND type zinc finger protein                                                                          |                                                                              | 2.26 |
| SPAC8F11.07c  |                | nitrilase (predicted)                                                                                     |                                                                              | 2.26 |
| SPAC23H4.01c  |                | arrestin/PY protein 1                                                                                     | arrestin/PY protein 1                                                        | 2.26 |
| SPAC11E3.05   |                | membrane transporter (predicted)                                                                          |                                                                              | 2.25 |
| SPBC146.01    | <i>mug111</i>  | sequence orphan                                                                                           | sequence orphan                                                              | 2.25 |
| SPAC16E8.17c  | <i>sif1</i>    | Sad1 interacting factor 1                                                                                 | Sad1 interacting factor 1                                                    | 2.25 |
| SPAC664.15    | <i>ntp1</i>    | alpha,alpha-trehalase Ntp1                                                                                | alpha,alpha-trehalase Ntp1                                                   | 2.25 |
| SPAC17G8.10c  | <i>ppk24</i>   | serine/threonine protein kinase Ppk24                                                                     |                                                                              | 2.25 |
| SPAC977.13c   |                | peroxin Pex32 (predicted)                                                                                 | peroxin Pex32 (predicted)                                                    | 2.25 |
| SPAC513.06c   | <i>mrp7</i>    | mitochondrial ribosomal protein subunit L27                                                               | mitochondrial ribosomal protein subunit L27                                  | 2.25 |
| SPBC56F2.05c  | <i>urg2</i>    | uracil phosphoribosyltransferase (predicted)                                                              | uracil phosphoribosyltransferase (predicted)                                 | 2.25 |
| SPCC1682.11c  |                | dipeptidyl aminopeptidase (predicted)                                                                     | dipeptidyl aminopeptidase (predicted)                                        | 2.25 |
| SPCC417.11c   |                | GINS complex subunit Psf1 (predicted)                                                                     |                                                                              | 2.24 |
| SPAC1834.11c  | <i>apc2</i>    | anaphase-promoting complex subunit Apc2                                                                   |                                                                              | 2.24 |
| SPMIT.04      |                | transcription factor (predicted)                                                                          | transcription factor (predicted)                                             | 2.24 |
| SPCC24B10.14c | <i>mug51</i>   | conserved fungal protein                                                                                  | conserved fungal protein                                                     | 2.24 |
| SPAC16A10.01  | <i>fap1</i>    | L-pipecolate oxidase                                                                                      | L-pipecolate oxidase                                                         | 2.24 |
| SPBP8B7.18c   | <i>vps1302</i> | chorein homolog                                                                                           |                                                                              | 2.23 |
| SPCC417.07c   |                | thioesterase superfamily protein                                                                          |                                                                              | 2.23 |



|               |              |                                                          |                                                                        |      |
|---------------|--------------|----------------------------------------------------------|------------------------------------------------------------------------|------|
| SPAC1002.10c  | <i>ned1</i>  | lipin Ned1                                               | lipin                                                                  | 2.23 |
| SPAC1565.07c  | <i>ypt71</i> | GTPase Ypt71                                             | GTPase Ypt71                                                           | 2.23 |
| SPBC713.06    |              | hydrolase (predicted)                                    | hydrolase (predicted)                                                  | 2.23 |
| SPAC140.01    |              | AMP-activated protein kinase beta subunit (predicted)    | AMP-activated protein kinase beta subunit (predicted)                  | 2.22 |
| SPBC19C2.04c  |              | S. pombe specific multicopy membrane protein family 1    | S. pombe specific multicopy membrane protein family 1                  | 2.22 |
| SPBC1198.12   | <i>rhp16</i> | Rad16 homolog Rhp16                                      | Rad16 homolog Rhp16                                                    | 2.22 |
| SPBC1711.12   |              | conserved fungal protein                                 |                                                                        | 2.22 |
| SPBC646.12c   | <i>gmh3</i>  | alpha-1,2-galactosyltransferase Gmh3                     | alpha-1,2-galactosyltransferase Gmh3                                   | 2.22 |
| SPAC7D4.05    |              | trans-aconitate 3-methyltransferase (predicted)          | trans-aconitate 3-methyltransferase (predicted)                        | 2.22 |
| SPAC2H10.02c  | <i>pof11</i> | F-box protein Pof11                                      | F-box protein Pof11                                                    | 2.22 |
| SPCC320.05    | <i>cit1</i>  | citrate synthase (predicted)                             | citrate synthase                                                       | 2.22 |
| SPAC458.06    |              | NAD/NADH kinase (predicted)                              | NAD/NADH kinase (predicted)                                            | 2.21 |
| SPAC688.08    | <i>pku80</i> | Ku domain protein Pku80                                  |                                                                        | 2.21 |
| SPAC144.08    | <i>mam3</i>  | cell agglutination protein Mam3                          |                                                                        | 2.21 |
| SPBP35G2.06c  |              | DEP domain protein                                       |                                                                        | 2.21 |
| SPCC1450.12   | <i>gst2</i>  | glutathione S-transferase Gst2                           | glutathione S-transferase Gst2                                         | 2.21 |
| SPCC70.02c    | <i>arb2</i>  | argonaute binding protein 2                              | argonaute binding protein 2                                            | 2.20 |
| SPMIT.05      | <i>ppk18</i> | serine/threonine protein kinase Ppk18 (predicted)        | serine/threonine protein kinase Ppk18 (predicted)                      | 2.20 |
| SPAC29A4.12c  |              | DUF1776 family protein                                   | DUF1776 family protein                                                 | 2.20 |
| SPBC1289.16c  |              | exocyst complex subunit Exo84                            | exocyst complex subunit Exo84                                          | 2.20 |
| SPAC2F3.07c   |              | vacuolar protein involved in phosphoinositide metabolism |                                                                        | 2.20 |
| SPAC644.08    | <i>mug66</i> | meiotically upregulated gene Mug66                       | meiotically upregulated gene Mug66                                     | 2.19 |
| SPAC637.13c   |              | dipeptidyl aminopeptidase (predicted)                    | dipeptidyl aminopeptidase (predicted)                                  | 2.19 |
| SPAC26H5.09c  |              | sequence orphan                                          | sequence orphan                                                        | 2.19 |
| SPBC11B10.08  |              | DUF89 family protein                                     | DUF89 family protein                                                   | 2.18 |
| SPAC2E1P3.05c | <i>dnm1</i>  | dynamamin Dnm1                                           | dynamamin Dnm1                                                         | 2.18 |
| SPBC1685.01   |              | esterase/lipase (predicted)                              | esterase/lipase (predicted)                                            | 2.18 |
| SPCC622.03c   | <i>cdc7</i>  | serine/threonine protein kinase Cdc7                     |                                                                        | 2.18 |
| SPBC577.05c   | <i>gpi18</i> | pig-V (predicted)                                        | pig-V                                                                  | 2.18 |
| SPCC74.04     |              |                                                          | dubious                                                                | 2.17 |
| SPBC365.02c   |              | Niemann-Pick disease type C2 protein hE1 homolog         | phosphatidylglycerol/phosphatidylinositol transfer protein (predicted) | 2.17 |
| SPAC589.04    |              | pleckstrin homology domain protein                       | transcriptional coactivator (predicted)                                | 2.17 |

|               |              |                                                                                                        |                                                              |      |
|---------------|--------------|--------------------------------------------------------------------------------------------------------|--------------------------------------------------------------|------|
| SPAC19G12.04  | <i>pas1</i>  | cyclin Pas1                                                                                            | cyclin Pas1                                                  | 2.17 |
| SPBCPT2R1.06c |              | leukotriene A-4 hydrolase (predicted)                                                                  | leukotriene A-4 hydrolase (predicted)                        | 2.17 |
| SPBC3B9.06c   | <i>gsk31</i> | serine/threonine protein kinase Gsk31                                                                  |                                                              | 2.17 |
| SPMIT.03      | <i>tco89</i> | TORC1 subunit Tco89                                                                                    | sequence orphan                                              | 2.17 |
| SPBC16A3.09c  |              | transcription factor (predicted)                                                                       | transcription factor                                         | 2.17 |
| SPCC162.10    |              | cytoplasmic vesicle protein, Vid24 family                                                              | cytoplasmic vesicle protein, Vid24 family                    | 2.16 |
| SPCC757.03c   |              | nucleotide pyrophosphatase (predicted)                                                                 |                                                              | 2.16 |
| SPBC1198.14c  | <i>cmb1</i>  | cytosine-mismatch binding protein 1                                                                    | cytosine-mismatch binding protein 1                          | 2.16 |
| SPAC1952.15c  |              | plasma membrane protein involved in inositol lipid-mediated signaling                                  | conserved fungal protein                                     | 2.16 |
| SPBC1711.02   | <i>sid1</i>  | PAK-related kinase Sid1                                                                                | PAK-related kinase Sid1                                      | 2.16 |
| SPAC23D3.11   |              | amidase (predicted)                                                                                    | amidase (predicted)                                          | 2.16 |
| SPCC794.04c   | <i>mad2</i>  | spindle checkpoint protein Mad2                                                                        |                                                              | 2.16 |
| SPCC132.03    |              | manganese superoxide dismutase (AF069292)                                                              | manganese superoxide dismutase (AF069292)                    | 2.15 |
| SPBP35G2.10   |              | human CCDC55 homolog                                                                                   | human CCDC55 homolog                                         | 2.15 |
| SPBC354.11c   |              | sequence orphan                                                                                        |                                                              | 2.15 |
| SPBC1683.08   |              | dihydrolipoamide S-succinyltransferase, e2 component of oxoglutarate dehydrogenase complex (predicted) |                                                              | 2.15 |
| SPBC800.13    | <i>mug74</i> | sequence orphan                                                                                        |                                                              | 2.15 |
| SPBC26H8.04c  |              | membrane transporter                                                                                   | membrane transporter                                         | 2.15 |
| SPBC887.17    | <i>msp1</i>  | mitochondrial GTPase Msp1                                                                              |                                                              | 2.15 |
| SPCPB16A4.02c |              | SAGA complex subunit Spt20 (predicted)                                                                 | SAGA complex subunit Spt20 (predicted)                       | 2.15 |
| SPAP27G11.05c | <i>pmp31</i> | plasma membrane proteolipid Pmp31                                                                      | plasma membrane proteolipid Pmp31                            | 2.14 |
| SPAC4G8.03c   | <i>gpa2</i>  | heterotrimeric G protein alpha-2 subunit Gpa2                                                          | heterotrimeric G protein alpha-2 subunit Gpa2 (PMID 1340462) | 2.14 |
| SPAC20G8.03   | <i>ggt2</i>  | gamma-glutamyltranspeptidase Ggt2                                                                      | gamma-glutamyltranspeptidase Ggt2                            | 2.14 |
| SPCC61.05     |              | DUF221 family protein                                                                                  | DUF221 family protein                                        | 2.14 |
| SPAC19B12.13  |              | sequence orphan                                                                                        | sequence orphan                                              | 2.14 |
| SPAC22H10.12c |              | transcription factor (predicted)                                                                       |                                                              | 2.14 |
| SPAPJ695.01c  | <i>rec6</i>  | meiotic recombination protein Rec6                                                                     |                                                              | 2.14 |
| SPBC19F8.04c  | <i>vps16</i> | HOPS complex subunit Vps16 (predicted)                                                                 | HOPS complex subunit Vps16 (predicted)                       | 2.13 |
| SPBC947.06c   |              | pseudogene                                                                                             |                                                              | 2.13 |
| SPAC13G6.15c  | <i>fzo1</i>  | mitochondrial fusion GTPase protein                                                                    |                                                              | 2.13 |

|               |               |                                                                    |                                                  |      |
|---------------|---------------|--------------------------------------------------------------------|--------------------------------------------------|------|
| SPAC1556.04c  | <i>cgs2</i>   | cAMP-specific phosphodiesterase Cgs2                               | cAMP-specific phosphodiesterase Cgs2             | 2.13 |
| SPMIT.06      |               | nucleoside 2-deoxyribosyltransferase (predicted)                   | nucleoside 2-deoxyribosyltransferase (predicted) | 2.13 |
| SPBC1709.11c  |               | ubiquitin-protein ligase E3                                        | ubiquitin-protein ligase E3                      | 2.13 |
| SPBC660.05    |               | succinate-CoA ligase (beta subunit)                                | succinate-CoA ligase (beta subunit)              | 2.13 |
| SPBC83.03c    | <i>ssm4</i>   | p150-Glued                                                         |                                                  | 2.13 |
| SPCC1620.08   |               | sequence orphan                                                    | sequence orphan                                  | 2.12 |
| SPBP23A10.14c | <i>ypt7</i>   | GTPase Ypt7                                                        |                                                  | 2.12 |
| SPAC823.16c   |               | conserved protein (fungal and plant)                               | conserved protein (fungal and plant)             | 2.12 |
| SPAC328.07c   |               | NADP-dependent oxidoreductase (predicted)                          | NADP-dependent oxidoreductase (predicted)        | 2.12 |
| SPAC19G12.11  | <i>dak1</i>   | dihydroxyacetone kinase Dak1                                       | dihydroxyacetone kinase Dak1                     | 2.11 |
| SPAC139.05    |               | DUF890 family protein                                              | DUF890 family protein                            | 2.11 |
| SPAC2G11.09   | <i>mug122</i> | PX/PXA domain protein                                              | PX/PXA domain protein                            | 2.11 |
| SPBC577.13    | <i>cid2</i>   | caffeine induced death protein Cid2                                | caffeine induced death protein Cid2              | 2.11 |
| SPBC609.01    |               | C2 domain protein                                                  | C2 domain protein                                | 2.10 |
| SPBC2D10.17   |               | vacuolar membrane zinc transporter (predicted)                     | vacuolar membrane zinc transporter (predicted)   | 2.10 |
| SPAC22A12.01c | <i>meu8</i>   | aldehyde dehydrogenase Meu8 (predicted)                            | betaine aldehyde dehydrogenase (predicted)       | 2.10 |
| SPAC18G6.01c  | <i>pk11</i>   | kinesin-like protein Pk11                                          | kinesin-like protein Pk11                        | 2.10 |
| SPBC12C2.12c  |               | peptide N-glycanase (predicted)                                    |                                                  | 2.10 |
| SPBC4.01      | <i>atg12</i>  | autophagy associated protein Atg12                                 | autophagy associated protein Atg12               | 2.09 |
| SPAC1687.07   | <i>mam2</i>   | pheromone p-factor receptor                                        | pheromone p-factor receptor (PMID 1657593)       | 2.09 |
| SPBC405.04c   | <i>tas3</i>   | RITS complex subunit 3                                             |                                                  | 2.09 |
| SPAC1296.06   | <i>scr1</i>   | transcription factor Scr1                                          |                                                  | 2.09 |
| SPCC330.01c   | <i>cdr1</i>   | GIN4 family protein kinase Cdr1                                    | GIN4 family protein kinase Cdr1                  | 2.09 |
| SPAC328.08c   |               | potassium ion/proton antiporter                                    | potassium ion/proton antiporter                  | 2.08 |
| SPCC191.06    |               | transcription factor, zf-fungal binuclear cluster type (predicted) |                                                  | 2.07 |
| SPBC1271.01c  |               | dubious                                                            | dubious                                          | 2.07 |
| SPAC869.07c   | <i>pof1</i>   | F-box/WD repeat protein Pof1                                       | F-box protein Pof1                               | 2.07 |
| SPCC576.01c   |               | transcription factor (predicted)                                   |                                                  | 2.07 |
| SPAC959.05c   |               | mitochondrial intermembrane space protein sorting protein          |                                                  | 2.06 |
| SPBC2A9.03    | <i>ucp8</i>   | UBA/EH/EF hand domain protein Ucp8                                 |                                                  | 2.06 |

|               |               |                                                              |                                                               |      |
|---------------|---------------|--------------------------------------------------------------|---------------------------------------------------------------|------|
| SPBC106.08c   | <i>cmk1</i>   | calcium/calmodulin-dependent protein kinase Cmk1             | calcium/calmodulin-dependent protein kinase Cmk1              | 2.06 |
| SPAPB1A11.03  | <i>nse2</i>   | Smc5-6 complex non-SMC subunit 2                             | Smc5-6 complex non-SMC subunit 2 (PMID 12966087)              | 2.05 |
| SPBPB21E7.06  | <i>cox1</i>   | cytochrome c oxidase 1                                       | cytochrome c oxidase 1; similar to <i>S. cerevisiae</i> Q0045 | 2.05 |
| SPAC869.01    | <i>pub3</i>   | ubiquitin-protein ligase E3                                  |                                                               | 2.05 |
| SPAC144.16    | <i>thi2</i>   | thiazole biosynthetic enzyme                                 |                                                               | 2.05 |
| SPCC188.07    |               | nicotinic acid plasma membrane transporter (predicted)       | nicotinic acid plasma membrane transporter (predicted)        | 2.05 |
| SPAC227.03c   | <i>cwf16</i>  | splicing factor (predicted)                                  |                                                               | 2.05 |
| SPAC3A12.06c  |               | NAD/NADH kinase (predicted)                                  | NAD/NADH kinase (predicted)                                   | 2.05 |
| SPAC458.05    |               | UPF0171 family protein                                       |                                                               | 2.05 |
| SPCC1739.15   | <i>coq4</i>   | ubiquinone biosynthesis protein Coq4 (predicted)             | ubiquinone biosynthesis protein Coq4                          | 2.04 |
| SPAC23D3.13c  |               | histone H4 variant                                           | histone H4 variant                                            | 2.04 |
| SPPC31B10.02  |               | Der1-like (degradation in the ER) family                     |                                                               | 2.04 |
| SPCC330.04c   |               | MSP domain                                                   | MSP domain                                                    | 2.04 |
| SPAC1006.01   | <i>meu25</i>  | sequence orphan                                              |                                                               | 2.04 |
| SPAC6G10.10c  | <i>apc11</i>  | anaphase-promoting complex subunit Apc11                     | anaphase-promoting complex subunit Apc11                      | 2.03 |
| SPAC22E12.06c | <i>fis1</i>   | mitochondrial fission protein Fis1 (predicted)               | mitochondrial fission protein Fis1 (predicted)                | 2.03 |
| SPBC16C6.03c  | <i>gpi15</i>  | pig-H (predicted)                                            |                                                               | 2.03 |
| SPCC70.04c    | <i>mug169</i> | sequence orphan                                              | sequence orphan                                               | 2.03 |
| SPAC23C4.18c  | <i>dpm2</i>   | dolichol-phosphate mannosyltransferase subunit 2 (predicted) |                                                               | 2.03 |
| SPAC3H5.04    | <i>mde2</i>   | Mde2 protein                                                 |                                                               | 2.03 |
| SPBC1711.11   |               | NAD dependent epimerase/dehydratase family protein           | NAD dependent epimerase/dehydratase family protein            | 2.03 |
| SPCC1682.15   | <i>cpp1</i>   | protein farnesyltransferase beta subunit Cpp1                | protein farnesyltransferase beta subunit Cpp1                 | 2.02 |
| SPBC646.15c   | <i>fh1</i>    | fork head transcription factor Fh1                           |                                                               | 2.02 |
| SPBPB2B2.13   |               | sequence orphan                                              |                                                               | 2.02 |
| SPBC16A3.18   |               | tRNA nucleotidyltransferase (predicted)                      | tRNA nucleotidyltransferase (predicted)                       | 2.02 |
| SPBC83.01     | <i>pzh1</i>   | serine/threonine protein phosphatase Pzh1                    | serine/threonine protein phosphatase Pzh1                     | 2.02 |
| SPCC364.02c   |               | amino acid transporter (predicted)                           | amino acid transporter (predicted)                            | 2.02 |

|               |              |                                                             |                                                             |      |
|---------------|--------------|-------------------------------------------------------------|-------------------------------------------------------------|------|
| SPAC1142.08   |              | sequence orphan                                             | sequence orphan                                             | 2.02 |
| SPCC126.09    |              | sequence orphan                                             |                                                             | 2.01 |
| SPAC57A10.05c | <i>psf2</i>  | GINS complex subunit Psf2                                   |                                                             | 2.01 |
| SPAC227.14    |              | voltage-dependent anion-selective channel                   | voltage-dependent anion-selective channel                   | 2.01 |
| SPAC19B12.10  |              | sphingolipid biosynthesis protein                           | sphingolipid biosynthesis protein                           | 2.01 |
| SPBC18H10.05  |              | dubious                                                     | dubious                                                     | 2.01 |
| SPBC660.06    | <i>btn1</i>  | battenin CLN3 family protein                                | battenin CLN3 family protein                                | 2.01 |
| SPCC1442.11c  | <i>rep1</i>  | MBF transcription factor complex subunit Rep1               |                                                             | 2.00 |
| SPCC1919.03c  | <i>cdc10</i> | MBF transcription factor complex subunit Cdc10              |                                                             | 2.00 |
| SPBC409.12c   | <i>gad8</i>  | serine/threonine protein kinase Gad8                        | serine/threonine protein kinase Gad8 (PMID 12805221)        | 2.00 |
| SPBC28E12.06c |              | nitrilase (predicted)                                       | nitrilase (predicted)                                       | 2.00 |
| SPBC25B2.03   |              | membrane transporter (predicted)                            | membrane transporter (predicted)                            | 2.00 |
| SPAC1A6.11    |              | sequence orphan                                             |                                                             | 2.00 |
| SPBC1105.10   |              | sequence orphan                                             | sequence orphan                                             | 2.00 |
| SPAC31G5.07   | <i>scn1</i>  | TatD DNase family Scn1                                      | TatD DNase family Scn1                                      | 2.00 |
| SPCC18B5.11c  | <i>win1</i>  | MAP kinase kinase kinase Win1                               |                                                             | 2.00 |
| SPBC1348.01   |              | sequence orphan                                             | sequence orphan                                             | 1.99 |
| SPAC31G5.09c  | <i>cbp3</i>  | ubiquinol cytochrome-c reductase assembly protein Cbp3      | ubiquinol cytochrome-c reductase assembly protein Cbp3      | 1.99 |
| SPAC1952.09c  |              | sphingosine hydroxylase (predicted)                         |                                                             | 1.99 |
| SPCC757.04    |              | pseudogene                                                  |                                                             | 1.99 |
| SPCC320.04c   | <i>toc1</i>  | Tor Complex Tor2 interacting protein 1                      |                                                             | 1.98 |
| SPBC30D10.09c |              | conserved fungal protein                                    | conserved fungal protein                                    | 1.98 |
| SPBC4B4.02c   | <i>hem15</i> | ferrochelatase                                              | ferrochelatase                                              | 1.98 |
| SPBP4H10.17c  |              | conserved fungal protein                                    | conserved fungal protein                                    | 1.98 |
| SPAC1002.19   | <i>gpi7</i>  | GPI anchor biosynthesis protein Gpi7 (predicted)            | GPI anchor biosynthesis protein Gpi7 (predicted)            | 1.97 |
| SPBC11C11.06c | <i>ccq1</i>  | telomere maintenance protein                                | telomere maintenance protein                                | 1.97 |
| SPBC1D7.02c   | <i>bis1</i>  | stress response protein Bis1                                | stress response protein Bis1                                | 1.97 |
| SPBC216.03    | <i>tfb5</i>  | transcription factor TFIIH complex subunit Tfb5 (predicted) | transcription factor TFIIH complex subunit Tfb5 (predicted) | 1.97 |
| SPCC1259.15c  | <i>idp1</i>  | isocitrate dehydrogenase Idp1                               | isocitrate dehydrogenase Idp1                               | 1.97 |

|              |               |                                                                              |                                                           |      |
|--------------|---------------|------------------------------------------------------------------------------|-----------------------------------------------------------|------|
| SPAPB1A11.01 | <i>asp1</i>   | inositol hexakisphosphate kinase/inositol pyrophosphate synthase (predicted) | inositol hexakisphosphate kinase (predicted)              | 1.97 |
| SPCC285.10c  | <i>mug4</i>   | sequence orphan                                                              | sequence orphan                                           | 1.97 |
| SPBC543.05c  |               | transcription factor, zf-fungal binuclear cluster type (predicted)           | transcription factor (predicted)                          | 1.97 |
| SPAC6G10.08  | <i>thp1</i>   | uracil DNA N-glycosylase Thp1                                                | uracil DNA N-glycosylase Thp1 (PMID 12711670)             | 1.97 |
| SPCC70.03c   | <i>slu7</i>   | splicing factor Slu7                                                         |                                                           | 1.97 |
| SPAC328.04   | <i>cwc16</i>  | complexed with Cdc5 protein Cwf16                                            |                                                           | 1.96 |
| SPCC1235.15  | <i>thi9</i>   | thiamine transporter Thi9                                                    | amino acid permease, unknown 2                            | 1.96 |
| SPAPB8E5.10  |               | membrane transporter                                                         | membrane transporter                                      | 1.96 |
| SPAC13G7.13c | <i>mug184</i> | meiotically upregulated gene Mug184                                          | meiotically upregulated gene Mug184                       | 1.96 |
| SPACUNK4.10  |               | amino acid permease, unknown 15                                              | amino acid permease, unknown 15                           | 1.96 |
| SPCC11E10.01 | <i>mug15</i>  | sequence orphan                                                              | sequence orphan                                           | 1.96 |
| SPAC3G6.09c  |               | aromatic aminotransferase (predicted)                                        | aromatic aminotransferase (predicted)                     | 1.95 |
| SPBPB2B2.06c | <i>ypt4</i>   | GTPase Ypt4                                                                  | GTPase Ypt4                                               | 1.95 |
| SPBC6B1.05c  |               | LEA domain protein                                                           | LEA domain protein                                        | 1.95 |
| SPAC4H3.12c  |               | sequence orphan                                                              |                                                           | 1.95 |
| SPCC63.04    | <i>mug157</i> | conserved protein (fungal and bacterial)                                     | conserved protein (fungal and bacterial)                  | 1.95 |
| SPAC144.10c  | <i>mrp51</i>  | mitochondrial ribosomal protein subunit L51-b (predicted)                    | mitochondrial ribosomal protein subunit L51-b (predicted) | 1.95 |
| SPAC29A4.11  | <i>mug67</i>  | PPPDE peptidase family (predicted)                                           | PPPDE peptidase family (predicted)                        | 1.95 |
| SPAC167.05   | <i>liz1</i>   | pantothenate transporter                                                     |                                                           | 1.95 |
| SPCC320.03   | <i>prp16</i>  | ATP-dependent RNA helicase Prp16                                             |                                                           | 1.95 |
| SPBC20F10.06 |               | NLI interacting factor family                                                |                                                           | 1.94 |
| SPCC1494.03  | <i>zrt1</i>   | ZIP zinc transporter Zrt1                                                    |                                                           | 1.94 |
| SPAC20G4.05c | <i>pvg5</i>   | PvGal biosynthesis protein Pvg5                                              | PvGal biosynthesis protein Pvg5                           | 1.94 |
| SPAC9E9.05   | <i>vps17</i>  | retromer complex subunit Vps17                                               | retromer complex subunit Vps17                            | 1.94 |
| SPBC36.10    |               | conserved fungal protein                                                     |                                                           | 1.94 |
| SPCC965.09   | <i>hsf1</i>   | transcription factor Hsf1                                                    | transcription factor Hsf1                                 | 1.94 |
| SPBC530.05   | <i>grx3</i>   | monothiol glutaredoxin Grx3                                                  | monothiol glutaredoxin Grx3                               | 1.94 |
| SPBC15D4.12c | <i>res2</i>   | MBF transcription factor complex subunit Res2                                | MBF transcription factor complex subunit Res2             | 1.93 |
| SPBC12C2.02c |               | sequence orphan                                                              | sequence orphan                                           | 1.93 |
| SPAP8A3.05   | <i>mde3</i>   | serine/threonine protein kinase Mde3                                         |                                                           | 1.93 |
| SPAPYUG7.06  | <i>bgs2</i>   | 1,3-beta-glucan synthase subunit Bgs2                                        | 1,3-beta-glucan synthase subunit Bgs2                     | 1.92 |

|               |              |                                                                    |                                                        |      |
|---------------|--------------|--------------------------------------------------------------------|--------------------------------------------------------|------|
| SPBC16E9.17c  |              | RNA-binding protein                                                |                                                        | 1.92 |
| SPBC21D10.09c |              | WD repeat protein                                                  |                                                        | 1.92 |
| SPAC922.06    | <i>tsc1</i>  | hamartin                                                           | hamartin                                               | 1.92 |
| SPAC5D6.09c   |              | sequence orphan                                                    |                                                        | 1.92 |
| SPAC27D7.13c  | <i>tbf1</i>  | telomeric repeat binding factor Trf1                               |                                                        | 1.91 |
| SPAC4G9.10    | <i>nep1</i>  | NEDD8 protease Nep1                                                |                                                        | 1.91 |
| SPAC227.15    |              | protein phosphatase inhibitor (predicted)                          | protein phosphatase inhibitor (predicted)              | 1.91 |
| SPCC63.05     | <i>abc1</i>  | ABC1 kinase family protein                                         |                                                        | 1.91 |
| SPAC607.08c   | <i>cip1</i>  | RNA-binding protein Cip1                                           |                                                        | 1.91 |
| SPCC1183.05c  | <i>csn1</i>  | COP9/signalosome complex subunit Csn1                              |                                                        | 1.91 |
| SPBC409.17c   |              | mitochondrial Rieske ISP assembly ATPase (predicted)               | Rieske ISP assembly protein                            | 1.91 |
| SPBC32F12.08c |              | MS ion channel protein 1                                           |                                                        | 1.91 |
| SPAC4D7.10c   | <i>gnr1</i>  | heterotrimeric G protein beta subunit Gnr1                         | heterotrimeric G protein beta subunit Gnr1             | 1.91 |
| SPAC27E2.07   | <i>rga3</i>  | GTPase activating protein Rga3                                     | GTPase activating protein Rga3                         | 1.91 |
| SPAC1039.09   | <i>tfg1</i>  | transcription factor TFIIIF complex alpha subunit Tfg1 (predicted) | transcription factor TFIIIF complex alpha subunit Tfg1 | 1.90 |
| SPAC1F3.09    | <i>tco1</i>  | RTA1-like protein                                                  | RTA1-like protein                                      | 1.90 |
| SPCC1020.10   |              | membrane transporter                                               | membrane transporter                                   | 1.90 |
| SPBP4H10.16c  | <i>btb1</i>  | BTB/POZ domain protein Btb1                                        | BTB/POZ domain protein Btb1                            | 1.90 |
| SPBC16D10.05  | <i>rad16</i> | DNA repair endonuclease XPF                                        | DNA repair endonuclease XPF                            | 1.90 |
| SPCC757.02c   |              | peroxin Pex28/29                                                   | peroxin Pex28/29                                       | 1.90 |
| SPAC25G10.03  | <i>tht2</i>  | meiotically upregulated gene Mug22                                 | meiotically upregulated gene Mug22                     | 1.90 |
| SPCC757.11c   |              | membrane transporter                                               | membrane transporter                                   | 1.89 |
| SPBC16E9.16c  |              | sequence orphan                                                    |                                                        | 1.89 |
| SPAC20G8.10c  |              | ubiquitin-protein ligase E3 (predicted)                            |                                                        | 1.89 |
| SPAC22A12.11  |              | transcription factor (predicted)                                   |                                                        | 1.89 |
| SPBP4H10.07   | <i>mok14</i> | alpha-1,3-glucan synthase Mok14                                    | alpha-1,3-glucan synthase Mok14                        | 1.89 |
| SPBP35G2.12   |              | transcription factor (predicted)                                   | transcription factor (predicted)                       | 1.89 |
| SPBC2F12.05c  |              | sequence orphan                                                    |                                                        | 1.88 |
| SPBPB21E7.08  |              | DUF1640 family protein                                             | DUF1640 family protein                                 | 1.88 |
| SPBC119.07    | <i>tip41</i> | TIP41-like type 2a phosphatase regulator Tip41                     | TIP41-like type 2a phosphatase regulator Tip41         | 1.88 |

|               |                |                                                                                               |                                                   |      |
|---------------|----------------|-----------------------------------------------------------------------------------------------|---------------------------------------------------|------|
| SPAC1F8.01    | <i>cox1102</i> | fusion cytochrome c oxidase assembly protein Cox1102, mitochondrial ribosomal protein Rsm2202 |                                                   | 1.88 |
| SPCC584.03c   |                | Mvp17/PMP22 family protein 1                                                                  | Mvp17/PMP22 family                                | 1.88 |
| SPBC18A7.01   |                | conserved eukaryotic protein                                                                  | conserved eukaryotic protein                      | 1.88 |
| SPAC22H12.05c |                | RNA polymerase II associated Paf1 complex (predicted)                                         |                                                   | 1.88 |
| SPAC144.13c   | <i>tel2</i>    | Tel2/Rad-5/Clk-2 family protein Tel2                                                          | nuclear telomere cap complex subunit (predicted)  | 1.88 |
| SPCC794.03    |                | nuclease, XP-G family                                                                         | nuclease, XP-G family                             | 1.88 |
| SPCC285.11    |                | sequence orphan                                                                               |                                                   | 1.87 |
| SPAC14C4.07   |                | serine/threonine protein phosphatase (predicted)                                              |                                                   | 1.87 |
| SPCC965.06    |                | vacuolar sorting protein (predicted)                                                          |                                                   | 1.87 |
| SPCC70.10     |                | iron sulfur cluster assembly protein (predicted)                                              |                                                   | 1.87 |
| SPBC428.16c   |                | phospholipid scramblase                                                                       | scramblase                                        | 1.87 |
| SPAC6F12.12   | <i>cdd1</i>    | cytidine deaminase Ccd1                                                                       | cytidine deaminase Pcd1                           | 1.87 |
| SPBC1778.03c  | <i>pcp1</i>    | pericentrin Pcp1                                                                              | pericentrin Pcp1                                  | 1.87 |
| SPAC15F9.01c  |                | S. pombe specific DUF999 family protein 1                                                     | S. pombe specific DUF999 family protein 1         | 1.87 |
| SPBC947.08c   |                | glycoprotein (predicted)                                                                      |                                                   | 1.86 |
| SPAC5D6.06c   |                | inorganic pyrophosphatase                                                                     | inorganic pyrophosphatase                         | 1.86 |
| SPAC23G3.02c  |                | mitochondrial iron ion transporter                                                            | mitochondrial iron ion transporter                | 1.86 |
| SPCC63.14     |                | tubulin specific chaperone cofactor C (predicted)                                             | tubulin specific chaperone cofactor C (predicted) | 1.86 |
| SPAC25B8.18   | <i>sds23</i>   | inducer of sexual development Sds23/Moc1                                                      |                                                   | 1.86 |
| SPCC18B5.05c  |                | THIJ/PFPI family peptidase (predicted)                                                        | THIJ/PFPI family peptidase (predicted)            | 1.86 |
| SPCC16C4.03   |                | proline dehydrogenase                                                                         | proline dehydrogenase                             | 1.86 |
| SPAC19A8.05c  |                | mitochondrial DNA binding endonuclease                                                        |                                                   | 1.86 |
| SPAC6B12.02c  |                | sequence orphan                                                                               | sequence orphan                                   | 1.86 |
| SPCC16A11.04  |                | phosphatidylinositol-3-phosphatase (predicted)                                                | phosphatidylinositol-3-phosphatase (predicted)    | 1.86 |
| SPBC4F6.06    |                | caspase                                                                                       | caspase                                           | 1.85 |
| SPAP27G11.16  | <i>duo1</i>    | DASH complex subunit Duo1 (predicted)                                                         |                                                   | 1.85 |
| SPAC10F6.04   | <i>aah2</i>    | alpha-amylase homolog Aah2                                                                    | alpha-amylase homolog Aah2                        | 1.85 |
| SPBC1289.11   | <i>mug30</i>   | ubiquitin-protein ligase E3                                                                   |                                                   | 1.85 |



|               |              |                                                           |                                                                        |      |
|---------------|--------------|-----------------------------------------------------------|------------------------------------------------------------------------|------|
| SPAC6B12.08   | <i>rap1</i>  | telomere binding protein Rap1                             |                                                                        | 1.85 |
| SPAPB8E5.05   |              | uracil permease (predicted)                               |                                                                        | 1.85 |
| SPCC320.06    |              | phosphatidylserine decarboxylase (predicted)              | phosphatidylserine decarboxylase (predicted)                           | 1.85 |
| SPAC6C3.08    | <i>mus7</i>  | DNA repair protein Mus7/Mms22                             | DNA repair protein Mus7                                                | 1.85 |
| SPAC11D3.09   |              | ubiquitin-protein ligase E3 (predicted)                   |                                                                        | 1.85 |
| SPCC191.05c   | <i>tim40</i> | TIM22 inner membrane protein import complex subunit Tim40 | TIM22 inner membrane protein import complex subunit Tim40              | 1.85 |
| SPACUNK12.02c |              | isocitrate lyase                                          | isocitrate lyase                                                       | 1.84 |
| SPAC1420.01c  |              | DUF59 family protein                                      | DUF59 family protein                                                   | 1.84 |
| SPAC22F3.09c  |              | sequence orphan                                           |                                                                        | 1.84 |
| SPBC21B10.02  |              | palmitoyltransferase (predicted)                          |                                                                        | 1.84 |
| SPAC2F3.08    | <i>pmp1</i>  | dual-specificity MAP kinase phosphatase Pmp1              | dual-specificity MAP kinase phosphatase Pmp1                           | 1.83 |
| SPAC1142.03c  | <i>mug65</i> | spore wall assembly protein (predicted)                   | spore wall assembly protein (predicted)                                | 1.83 |
| SPBC800.02    | <i>tsf1</i>  | mitochondrial translation elongation factor EF-Ts Tsf1    | mitochondrial translation elongation factor EF-Ts Tsf1 (PMID 15695360) | 1.83 |
| SPBC1711.17   | <i>tra1</i>  | phosphatidylinositol kinase-related protein Tra1          |                                                                        | 1.83 |
| SPAC186.07c   |              | mitochondrial GTPase Guf1 (predicted)                     | mitochondrial GTPase Guf1 (predicted)                                  | 1.83 |
| SPAC26A3.11   |              | human GRASP protein homolog (predicted)                   | human GRASP protein homolog (predicted)                                | 1.83 |
| SPBC800.11    |              | NADH pyrophosphatase (predicted)                          |                                                                        | 1.83 |
| SPBC685.03    | <i>sre1</i>  | sterol regulatory element binding protein Sre1            |                                                                        | 1.83 |
| SPBC23G7.16   |              | WD repeat protein, human WDR7 ortholog                    |                                                                        | 1.83 |
| SPAC17A2.06c  | <i>coq6</i>  | monooxygenase Coq6                                        |                                                                        | 1.82 |
| SPAC12G12.16c |              | inositol phosphosphingolipid phospholipase C (predicted)  |                                                                        | 1.82 |
| SPBC902.05c   | <i>sgt1</i>  | SGT1 family transcriptional regulator Sgt1                | SGT1 family protein Sgt1                                               | 1.82 |
| SPAPYUK71.03c |              | nifs homolog                                              | nifs homolog                                                           | 1.82 |
| SPBC1773.05c  | <i>whi5</i>  | cell cycle transcriptional repressor Whi5                 | cell cycle transcriptional repressor Whi5                              | 1.82 |
| SPBC646.13    |              | protein disulfide isomerase (predicted)                   | protein disulfide isomerase (predicted)                                | 1.82 |
| SPAC22A12.17c |              | mitochondrial ribosomal protein subunit L9 (predicted)    | mitochondrial ribosomal protein subunit L9 (predicted)                 | 1.82 |

|               |              |                                                       |                                                       |      |
|---------------|--------------|-------------------------------------------------------|-------------------------------------------------------|------|
| SPAC56E4.02c  |              | aminopeptidase (predicted)                            | aminopeptidase (predicted)                            | 1.82 |
| SPBC11C11.03  | <i>atg15</i> | triacylglycerol lipase Atg15 (predicted)              | triacylglycerol lipase Atg15 (predicted)              | 1.81 |
| SPAC18B11.05  |              | serine/threonine protein kinase (predicted)           | serine/threonine protein kinase (predicted)           | 1.81 |
| SPBC36B7.05c  |              | RNA-binding protein                                   | RNA-binding protein                                   | 1.81 |
| SPAC2E12.05   |              | sequence orphan                                       | sequence orphan                                       | 1.81 |
| SPBC21B10.12  | <i>vps8</i>  | WD repeat protein Vps8                                | WD repeat protein Vps8                                | 1.81 |
| SPBPB2B2.11   |              | 6-phosphofructo-2-kinase (predicted)                  | 6-phosphofructo-2-kinase (predicted)                  | 1.81 |
| SPAC4H3.08    | <i>vps41</i> | vacuolar protein sorting-associated protein Vps41     | vacuolar protein sorting-associated protein Vps41     | 1.80 |
| SPCPJ732.03   | <i>isa2</i>  | iron-sulfur protein Isa2                              |                                                       | 1.80 |
| SPAC1F3.02c   |              | sequence orphan                                       | sequence orphan                                       | 1.80 |
| SPAC869.06c   |              | AP-1 accessory protein (predicted)                    |                                                       | 1.80 |
| SPAC12B10.13  | <i>coq9</i>  | ubiquinone biosynthesis protein Coq9 (predicted)      | ubiquinone biosynthesis protein Coq9 (predicted)      | 1.79 |
| SPBC2D10.06   |              | dubious                                               | dubious                                               | 1.79 |
| SPAC18B11.04  | <i>apc10</i> | anaphase-promoting complex subunit Apc10              |                                                       | 1.79 |
| SPAC13F5.07c  | <i>snf5</i>  | chromatin remodeling complex subunit Snf5 (predicted) | chromatin remodeling complex subunit Snf5 (predicted) | 1.79 |
| SPAC1782.03   |              | ENTH domain protein (predicted)                       | conserved fungal protein                              | 1.79 |
| SPAC11E3.09   |              | DUF1941 family protein                                | DUF1941 family protein                                | 1.79 |
| SPCC1919.04   | <i>set6</i>  | histone lysine methyltransferase Set6 (predicted)     |                                                       | 1.79 |
| SPAC26F1.11   | <i>ufd1</i>  | Cdc48-Ufd1-Npl4 complex component Ufd1 (predicted)    |                                                       | 1.79 |
| SPCC338.04    | <i>rhp14</i> | XP-A family homolog Rhp14                             | XP-A family homolog Rhp14                             | 1.78 |
| SPBC19C2.05   |              | ATP-dependent RNA helicase, spliceosomal (predicted)  | ATP-dependent RNA helicase, spliceosomal (predicted)  | 1.78 |
| SPCC338.12    |              | DUF1748 family protein                                | DUF1748 family protein                                | 1.78 |
| SPCC1620.04c  | <i>cdc24</i> | DNA replication protein Cdc24                         | DNA replication protein Cdc24                         | 1.78 |
| SPBC12D12.04c |              | conserved fungal protein                              | conserved fungal protein                              | 1.78 |
| SPCC1223.09   | <i>lig4</i>  | DNA ligase Lig4                                       | DNA ligase Lig4                                       | 1.78 |
| SPCC548.07c   |              | phosphoinositide binding protein                      | phosphoinositide binding protein                      | 1.78 |
| SPAC1039.05c  | <i>ubx2</i>  | UBX domain protein Ubx2                               | UBX domain protein Ubx2                               | 1.78 |
| SPAC1834.08   | <i>mto1</i>  | MT organizer Mto1                                     | MT organizer Mto1                                     | 1.78 |
| SPCC1235.14   |              | inorganic phosphate transporter (predicted)           | inorganic phosphate transporter (predicted)           | 1.78 |

|               |              |                                                                    |                                                              |      |
|---------------|--------------|--------------------------------------------------------------------|--------------------------------------------------------------|------|
| SPAPB17E12.09 | <i>mcp3</i>  | sequence orphan                                                    | sequence orphan                                              | 1.77 |
| SPAC824.07    |              | inorganic anion exchanger (predicted)                              |                                                              | 1.77 |
| SPBC530.07c   |              | dubious                                                            |                                                              | 1.77 |
| SPAC2C4.15c   | <i>cdc16</i> | two-component GAP Cdc16                                            | two-component GAP Cdc16                                      | 1.77 |
| SPAC25H1.03   |              | phosphatase activator (predicted)                                  |                                                              | 1.77 |
| SPAP7G5.06    |              | pseudogene (predicted)                                             |                                                              | 1.77 |
| SPAC212.07c   | <i>pck2</i>  | protein kinase C (PKC)-like Pck2                                   |                                                              | 1.77 |
| SPAC1805.10   | <i>ubc1</i>  | ubiquitin conjugating enzyme Ubc1                                  |                                                              | 1.77 |
| SPBC713.02c   |              | transcription factor, zf-fungal binuclear cluster type (predicted) |                                                              | 1.77 |
| SPAC11E3.02c  |              | mitochondrial DNA binding endonuclease                             |                                                              | 1.76 |
| SPBC1773.03c  | <i>rad15</i> | transcription factor TFIIH complex subunit Rad15                   | transcription factor TFIIH complex subunit Rad15             | 1.76 |
| SPBC23G7.13c  |              | FAD synthetase                                                     | FAD synthetase                                               | 1.76 |
| SPBC839.02    | <i>sec8</i>  | exocyst complex subunit Sec8                                       | exocyst complex subunit Sec8                                 | 1.76 |
| SPAC11G7.03   | <i>itr2</i>  | MFS myo-inositol transporter                                       | MFS myo-inositol transporter                                 | 1.76 |
| SPAC4F10.02   |              | dienelactone hydrolase family                                      |                                                              | 1.76 |
| SPAC27F1.05c  | <i>bdp1</i>  | transcription factor TFIIIB complex subunit Bdp1 (predicted)       | transcription factor TFIIIB complex subunit Bdp1 (predicted) | 1.76 |
| SPAC22H10.02  |              | conserved fungal protein                                           | conserved fungal protein                                     | 1.76 |
| SPAC1D4.02c   |              | sequence orphan                                                    |                                                              | 1.76 |
| SPAC10F6.14c  |              | IMP 5'-nucleotidase (predicted)                                    |                                                              | 1.76 |
| SPAC1B3.20    | <i>pep3</i>  | ubiquitin-protein ligase E3 (predicted)                            | ubiquitin-protein ligase E3 (predicted)                      | 1.76 |
| SPCC1322.08   | <i>meu15</i> | sequence orphan                                                    | sequence orphan                                              | 1.75 |
| SPCC962.01    |              | human hmmtag2 homolog                                              | human hmmtag2 homolog                                        | 1.75 |
| SPBC651.09c   | <i>stg1</i>  | SM22/transgelin-like actin modulating protein Stg1                 | SM22/transgelin-like actin modulating protein Stg1           | 1.75 |
| SPAC2C4.07c   | <i>brf1</i>  | transcription factor TFIIIB complex subunit Brf1                   |                                                              | 1.75 |
| SPAC11E3.06   | <i>spn7</i>  | septin Spn7                                                        |                                                              | 1.75 |
| SPBC800.07c   |              | human ZNF277P homolog                                              | human ZNF277P homolog                                        | 1.75 |
| SPBC17G9.13c  | <i>rga6</i>  | GTPase activating protein Rga6                                     | GTPase activating protein Rga6                               | 1.75 |
| SPAC4G8.04    | <i>ago1</i>  | argonaute                                                          | argonaute                                                    | 1.75 |
| SPBC26H8.01   |              | GRAM domain protein                                                |                                                              | 1.75 |
| SPAC6C3.04    | <i>wtf7</i>  | wtf element Wtf7                                                   | wtf element Wtf7                                             | 1.74 |
| SPCC1281.04   |              | sequence orphan                                                    | sequence orphan                                              | 1.74 |

|               |               |                                                                     |                                                                  |      |
|---------------|---------------|---------------------------------------------------------------------|------------------------------------------------------------------|------|
| SPBC21B10.11  | <i>pep7</i>   | prevacuole/endosomal FYVE tethering component Pep7 (predicted)      | prevacuole/endosomal FYVE tethering component Pep7 (predicted)   | 1.74 |
| SPBP16F5.03c  | <i>vps45</i>  | vacuolar sorting protein Vps 45 (predicted)                         | vacuolar sorting protein Vps 45                                  | 1.74 |
| SPAC22F8.02c  |               | DuF1740 family protein                                              |                                                                  | 1.74 |
| SPAC23C4.12   |               | sequence orphan                                                     | sequence orphan                                                  | 1.74 |
| SPBC1683.12   | <i>zfs1</i>   | CCCH tandem zinc finger protein, human Tristetraprolin homolog Zfs1 |                                                                  | 1.74 |
| SPBC21.02     |               | synoviolin homolog                                                  |                                                                  | 1.74 |
| SPBC106.13    |               | alpha,alpha-trehalose-phosphate synthase (predicted)                | alpha,alpha-trehalose-phosphate synthase (predicted)             | 1.74 |
| SPCC14G10.04  | <i>cut7</i>   | kinesin-like protein Cut7                                           | kinesin-like protein Cut7                                        | 1.74 |
| SPAC26F1.01   |               | RNA-binding protein                                                 |                                                                  | 1.74 |
| SPAC6F6.18c   |               | DUF1640 family protein                                              | DUF1640 family protein                                           | 1.73 |
| SPAC6C3.03c   |               | DNAJ domain protein, DNAJC11 family                                 | DNAJ domain protein, DNAJC11 family                              | 1.73 |
| SPAC19D5.01   | <i>maf1</i>   | repressor of RNA polymerase III Maf1 (predicted)                    | repressor of RNA polymerase III Maf1 (predicted)                 | 1.73 |
| SPCC4F11.02   |               | conserved fungal protein                                            | conserved fungal protein                                         | 1.73 |
| SPBC359.06    | <i>bud6</i>   | actin interacting protein 3 homolog Bud6                            |                                                                  | 1.73 |
| SPBC27B12.14  | <i>gdi1</i>   | GDP dissociation inhibitor Gdi1 (predicted)                         | GDP dissociation inhibitor Gdi1 (predicted)                      | 1.73 |
| SPAC23C11.06c |               | sterol binding ankyrin repeat protein                               | sterol binding ankyrin repeat protein                            | 1.73 |
| SPCC1223.12c  | <i>fab1</i>   | 1-phosphatidylinositol-3-phosphate 5-kinase Fab1                    | 1-phosphatidylinositol-3-phosphate 5-kinase Fab1 (PMID 10567352) | 1.72 |
| SPBC1289.10c  | <i>mug178</i> | mitochondrial ribosomal protein subunit L51-b                       |                                                                  | 1.72 |
| SPBC6B1.02    | <i>sod22</i>  | plasma membrane alkali metal cation/H+ antiporter Sod22             | plasma membrane alkali metal cation/H+ antiporter Sod22          | 1.72 |
| SPBC211.07c   |               | metallopeptidase                                                    | metallopeptidase                                                 | 1.72 |
| SPCC1795.07   | <i>spn5</i>   | septin Spn5                                                         | septin Spn5                                                      | 1.72 |
| SPAC3H1.11    |               | DNAJ domain protein Jac1 (predicted)                                | DNAJ domain protein Jac1 (predicted)                             | 1.72 |
| SPBC543.03c   |               | 6-phosphofructo-2-kinase                                            | 6-phosphofructo-2-kinase                                         | 1.72 |
| SPBC13G1.05   | <i>sod2</i>   | CPA1 sodium ion/proton antiporter                                   | CPA1 sodium ion/proton antiporter (PMID 8643524)                 | 1.72 |
| SPBC1271.09   |               | ABC1 kinase family protein                                          | ABC1 kinase family protein                                       | 1.72 |
| SPAPJ691.02   | <i>tps1</i>   | alpha,alpha-trehalose-phosphate synthase [UDP-forming]              | alpha,alpha-trehalose-phosphate synthase [UDP-forming]           | 1.72 |
| SPAC977.17    |               | microfibrillar-associated protein family protein                    | microfibrillar-associated protein family protein                 | 1.72 |

|               |               |                                                          |                                                          |      |
|---------------|---------------|----------------------------------------------------------|----------------------------------------------------------|------|
| SPAC167.06c   | <i>did4</i>   | vacuolar sorting protein Did4                            |                                                          | 1.71 |
| SPAC25H1.02   | <i>rsp1</i>   | random septum position protein Rsp1                      |                                                          | 1.71 |
| SPCC330.02    |               | ubiquitin family protein, human UBTD1 homolog            | ubiquitin family protein, human UBTD1 homolog            | 1.71 |
| SPBP8B7.30c   |               | sulfate transporter (predicted)                          |                                                          | 1.71 |
| SPCC10H11.02  |               | CPA1 sodium ion/proton antiporter                        | CPA1 sodium ion/proton antiporter                        | 1.71 |
| SPBC17A3.02   |               | TAP42 family protein (predicted)                         | TAP42 family protein (predicted)                         | 1.71 |
| SPCP20C8.03   | <i>vam6</i>   | guanyl-nucleotide exchange factor Vam6                   | guanyl-nucleotide exchange factor Vma6                   | 1.71 |
| SPAC630.07c   | <i>vps13a</i> | chorein homolog                                          | chorein homolog                                          | 1.70 |
| SPAC1002.20   |               | DUF408 family protein                                    | DUF408 family protein                                    | 1.70 |
| SPAC977.16c   | <i>git3</i>   | G-protein coupled receptor Git3                          | G-protein coupled receptor Git3                          | 1.70 |
| SPCC1494.08c  |               | non-specific DNA binding protein Spt2 (predicted)        | non-specific DNA binding protein Spt2 (predicted)        | 1.70 |
| SPBC1718.06   |               | hydroxyacid dehydrogenase (predicted)                    | hydroxyacid dehydrogenase (predicted)                    | 1.70 |
| SPBC337.06c   |               | DUF747 family protein                                    |                                                          | 1.70 |
| SPCC576.06c   | <i>ubc11</i>  | ubiquitin conjugating enzyme E2-C                        | ubiquitin conjugating enzyme E2-C (PMID 12724408)        | 1.70 |
| SPAC24C9.06c  |               | sequence orphan                                          | sequence orphan                                          | 1.70 |
| SPBC2G2.07c   | <i>pyp3</i>   | protein-tyrosine phosphatase Pyp3                        | protein-tyrosine phosphatase Pyp3                        | 1.70 |
| SPAC167.07c   |               | sequence orphan                                          |                                                          | 1.70 |
| SPAC27D7.03c  | <i>gpi8</i>   | pig-K                                                    | pig-K                                                    | 1.70 |
| SPCC4B3.01    |               | DUF1752 family protein                                   | DUF1752 family protein                                   | 1.70 |
| SPBC337.16    | <i>spf38</i>  | splicing factor Spf38                                    | splicing factor Spf38                                    | 1.70 |
| SPAC4A8.04    |               | GTPase Gem1                                              | GTPase Gem1 (PMID 12482879)                              | 1.70 |
| SPAC4G9.14    |               | 2',3'-cyclic-nucleotide 3'-phosphodiesterase (predicted) | 2',3'-cyclic-nucleotide 3'-phosphodiesterase (predicted) | 1.70 |
| SPAC18G6.09c  |               | chromosome segregation protein (predicted)               | chromosome segregation protein (predicted)               | 1.70 |
| SPCC1450.13c  | <i>tom13</i>  | mitochondrial TOM complex subunit Tom13                  |                                                          | 1.70 |
| SPBC1921.04c  | <i>nsc1</i>   | related to neuronal calcium sensor Ncs1                  | related to neuronal calcium sensor Ncs1                  | 1.69 |
| SPAPB1E7.08c  | <i>meu22</i>  | amino acid permease, unknown 11                          |                                                          | 1.69 |
| SPAC12B10.01c | <i>sck1</i>   | serine/threonine protein kinase Sck1                     | serine/threonine protein kinase Sck1                     | 1.69 |
| SPCC1450.07c  |               | mannosyltransferase complex subunit (predicted)          | mannosyltransferase complex subunit (predicted)          | 1.69 |

|               |              |                                                      |                                                      |      |
|---------------|--------------|------------------------------------------------------|------------------------------------------------------|------|
| SPAC186.02c   |              | ER membrane protein, BIG1 family (predicted)         | ER membrane protein, BIG1 family (predicted)         | 1.69 |
| SPBC15D4.11c  | <i>swi2</i>  | Swi5 complex subunit Swi2                            | Swi5 complex subunit Swi2                            | 1.69 |
| SPBP4H10.19c  |              | 26S proteasome regulator (predicted)                 | 26S proteasome regulator (predicted)                 | 1.69 |
| SPBC215.13    | <i>par2</i>  | protein phosphatase regulatory subunit Par2          | protein phosphatase regulatory subunit Par2          | 1.69 |
| SPAC3H8.04    |              | sequence orphan                                      |                                                      | 1.69 |
| SPAC17C9.06   |              | steroid reductase (predicted)                        | steroid reductase (predicted)                        | 1.69 |
| SPBC1604.01   | <i>cwf23</i> | DNAJ domain protein Cwf23                            |                                                      | 1.69 |
| SPCC777.02    | <i>pmh1</i>  | transcription factor TFIIH complex subunit Pmh1      |                                                      | 1.69 |
| SPBC23G7.11   |              | human down-regulated in multiple cancers-1 homolog 1 | human down-regulated in multiple cancers-1 homolog 1 | 1.69 |
| SPCC895.08c   | <i>pap1</i>  | transcription factor Caf3                            | transcription factor Caf3                            | 1.69 |
| SPBP8B7.07c   |              | conserved fungal protein                             |                                                      | 1.69 |
| SPAC1F7.03    |              | dubious                                              | dubious                                              | 1.69 |
| SPAC1F7.06    |              | pseudogene                                           | pseudogene                                           | 1.68 |
| SPAC22H12.01c |              | mitochondrial translation termination factor         |                                                      | 1.68 |
| SPBP19A11.07c | <i>hhp2</i>  | serine/threonine protein kinase Hhp2                 | serine/threonine protein kinase Hhp2 (PMID 8026462)  | 1.68 |
| SPAC1751.04   |              | conserved fungal protein                             |                                                      | 1.68 |
| SPCC23B6.01c  |              | human CAND1/TIP120 ortholog                          | TATA binding protein interacting protein (predicted) | 1.68 |
| SPAPB2B4.07   |              | FHA domain protein Far10 (predicted)                 |                                                      | 1.68 |
| SPBC19C7.04c  | <i>pmd1</i>  | leptomycin efflux transporter Pmd1                   | leptomycin efflux transporter Pmd1                   | 1.68 |
| SPBC947.10    | <i>mrp10</i> | mitochondrial ribosomal protein subunit Mrp10        | mitochondrial ribosomal protein subunit Mrp10        | 1.67 |
| SPBC14C8.01c  | <i>atp10</i> | F1-F0 ATPase assembly protein (predicted)            | F1-F0 ATPase assembly protein                        | 1.67 |
| SPAC2E1P3.02c |              | transcription factor (predicted)                     | transcription factor (predicted)                     | 1.67 |
| SPBC106.03    | <i>hsp16</i> | heat shock protein Hsp16                             |                                                      | 1.67 |
| SPCC1795.06   | <i>git1</i>  | C2 domain protein Git1                               |                                                      | 1.67 |
| SPAC29E6.05c  | <i>myo2</i>  | myosin II heavy chain                                | myosin II heavy chain                                | 1.67 |
| SPBC24C6.06   | <i>scd2</i>  | scaffold protein Scd2                                | scaffold protein Scd2                                | 1.67 |
| SPCC622.15c   |              | SAGA complex subunit Sgf29 (predicted)               |                                                      | 1.67 |
| SPBC29B5.01   |              | human ZC3H3 homolog                                  |                                                      | 1.67 |
| SPBC11C11.12  | <i>rec27</i> | meiotic recombination protein Rec27                  |                                                      | 1.67 |

|               |              |                                               |                                                         |      |
|---------------|--------------|-----------------------------------------------|---------------------------------------------------------|------|
| SPBP23A10.04  |              | cytoskeletal signaling protein                | cytoskeletal signaling protein                          | 1.67 |
| SPAC57A10.11c | <i>ure2</i>  | urease                                        | urease (PMID 9301025)                                   | 1.66 |
| SPBP8B7.27    |              | amidohydrolase                                | amidohydrolase                                          | 1.66 |
| SPCC24B10.02c | <i>gap1</i>  | GTPase activating protein Gap1                |                                                         | 1.66 |
| SPBC359.05    | <i>pin1</i>  | peptidyl-prolyl cis-trans isomerase Pin1      | peptidyl-prolyl cis-trans isomerase Pin1                | 1.66 |
| SPAC17G6.08   |              |                                               | dubious                                                 | 1.66 |
| SPBC1347.11   | <i>pst1</i>  | Clr6 histone deacetylase complex subunit Pst1 |                                                         | 1.66 |
| SPAC23E2.03c  |              | RanGTP-binding protein (predicted)            | RanGTP-binding protein (predicted)                      | 1.66 |
| SPBC106.10    |              | SAGA complex subunit (predicted)              |                                                         | 1.66 |
| SPAC644.07    | <i>mad3</i>  | mitotic spindle checkpoint protein Mad3       | mitotic spindle checkpoint protein Mad3                 | 1.66 |
| SPBC27B12.08  | <i>ppk21</i> | serine/threonine protein kinase Ppk21         |                                                         | 1.66 |
| SPCC16A11.15c | <i>pcr1</i>  | transcription factor Pcr1                     | transcription factor Pcr1                               | 1.65 |
| SPAC4F8.08    | <i>cwf15</i> | complexed with Cdc5 protein Cwf15             |                                                         | 1.65 |
| SPAC22A12.08c | <i>csn2</i>  | COP9/signalosome complex subunit Csn2         | COP9/signalosome complex subunit Csn2 (PMID 11854407)   | 1.65 |
| SPAC12G12.11c | <i>dot2</i>  | EAP30 family protein Dot2                     |                                                         | 1.65 |
| SPAC9E9.17c   |              | conserved fungal protein                      |                                                         | 1.65 |
| SPBC8D2.19    | <i>alo1</i>  | D-arabinono-1,4-lactone oxidase               | D-arabinono-1,4-lactone oxidase                         | 1.65 |
| SPBC119.09c   | <i>apc5</i>  | anaphase-promoting complex subunit Apc5       | anaphase-promoting complex subunit Apc5 (PMID 12477395) | 1.65 |
| SPCC790.02    | <i>pdt1</i>  | Nramp family manganese ion transporter        | Nramp family manganese ion transporter                  | 1.65 |
| SPAC14C4.03   | <i>tea4</i>  | tip elongation aberrant protein Tea4          | tip elongation aberrant protein Tea4                    | 1.65 |
| SPCC24B10.03  |              | guanyl-nucleotide exchange factor (predicted) | guanyl-nucleotide exchange factor                       | 1.65 |
| SPAC1783.07c  |              | urea transporter (predicted)                  | urea transporter (predicted)                            | 1.65 |
| SPCC1259.09c  | <i>pku70</i> | Ku domain protein Pku70                       | Ku domain protein Pku70                                 | 1.65 |
| SPAC212.04c   |              | TRAPP complex subunit Bet3 (predicted)        | TRAPP complex subunit Bet3 (predicted)                  | 1.64 |
| SPAC20G4.02c  | <i>cdc14</i> | SIN component Cdc14                           |                                                         | 1.64 |
| SPAC22F8.05   |              | cyclin pho85 family                           |                                                         | 1.64 |
| SPBC19C2.09   | <i>zds1</i>  | zds family protein Zds1                       | zds family protein Zds1                                 | 1.64 |
| SPAC11H11.02c |              | GTPase regulator (predicted)                  |                                                         | 1.64 |
| SPAC27D7.11c  |              | dubious                                       |                                                         | 1.64 |

|               |               |                                                                    |                                                             |      |
|---------------|---------------|--------------------------------------------------------------------|-------------------------------------------------------------|------|
| SPCC1322.14c  | <i>cho1</i>   | phosphatidyl-N-methylethanolamine N-methyltransferase (predicted)  |                                                             | 1.64 |
| SPBC609.03    |               | calreticulin/calnexin homolog                                      |                                                             | 1.64 |
| SPAC56F8.15   |               | frataxin homolog                                                   | frataxin homolog                                            | 1.64 |
| SPCC1919.14c  |               | leucine carboxyl methyltransferase (predicted)                     |                                                             | 1.63 |
| SPAC17G6.02c  |               | succinate-CoA ligase alpha subunit                                 | succinate-CoA ligase (alpha subunit)                        | 1.63 |
| SPAC19G12.03  |               | dubious                                                            | sequence orphan                                             | 1.63 |
| SPBC11C11.01  |               | 5-amino-6-(5-phosphoribosylamino) uracil reductase                 |                                                             | 1.63 |
| SPAC10F6.06   |               | NADPH cytochrome reductase (predicted)                             | NADPH cytochrome reductase                                  | 1.63 |
| SPAC869.09    | <i>tps2</i>   | trehalose-phosphate synthase Tps2 (predicted)                      | trehalose-phosphate synthase Tps2 (predicted)               | 1.63 |
| SPBC1685.05   |               | sequence orphan                                                    | sequence orphan                                             | 1.63 |
| SPAC20G8.02   | <i>mit1</i>   | SHREC complex subunit Mit1                                         |                                                             | 1.63 |
| SPBP4G3.03    | <i>cdc12</i>  | formin Cdc12                                                       | formin Cdc12                                                | 1.63 |
| SPAC139.03    |               | RNA-binding protein, G-patch type (predicted)                      | RNA-binding protein (predicted)                             | 1.63 |
| SPCC1322.05c  |               | HEAT repeat protein, unknown biological role                       | HEAT repeat protein, unknown biological role                | 1.63 |
| SPBC2G2.01c   | <i>mug162</i> | sequence orphan                                                    | sequence orphan                                             | 1.62 |
| SPAC23A1.18c  |               | serine protease (predicted)                                        |                                                             | 1.62 |
| SPCC1223.10c  |               | sequence orphan                                                    |                                                             | 1.62 |
| SPCP31B10.06  | <i>oar2</i>   | 3-oxoacyl-[acyl-carrier-protein] reductase Oar2 (predicted)        | 3-oxoacyl-[acyl-carrier-protein] reductase Oar2 (predicted) | 1.62 |
| SPBP18G5.03   |               | transcription factor, zf-fungal binuclear cluster type (predicted) |                                                             | 1.62 |
| SPBC1706.02c  | <i>cdt2</i>   | WD repeat protein Cdt2                                             | WD repeat protein Cdt2                                      | 1.62 |
| SPCC1235.08c  |               | carboxypeptidase (predicted)                                       |                                                             | 1.62 |
| SPBC2D10.18   |               | ubiquitin-protein ligase E3 (predicted)                            | ubiquitin-protein ligase E3 (predicted)                     | 1.61 |
| SPAP19A11.05c |               | sequence orphan                                                    | sequence orphan                                             | 1.61 |
| SPAC1006.04c  | <i>ppk31</i>  | serine/threonine protein kinase Ppk31 (predicted)                  |                                                             | 1.61 |
| SPBC21C3.03   | <i>spn6</i>   | septin Spn6                                                        | septin Spn6                                                 | 1.61 |
| SPBC26H8.05c  |               | conserved fungal protein                                           | conserved fungal protein                                    | 1.61 |
| SPBC428.10    | <i>git7</i>   | SGT1-like protein Git7                                             |                                                             | 1.60 |
| SPAC1952.13   | <i>lvs1</i>   | beige protein homolog                                              |                                                             | 1.60 |



|               |              |                                                     |                                                            |      |
|---------------|--------------|-----------------------------------------------------|------------------------------------------------------------|------|
| SPCC191.10    |              | zf-FYVE type zinc finger protein                    |                                                            | 1.60 |
| SPAC1F5.09c   | <i>exg2</i>  | glucan 1,3-beta-glucosidase Exg2                    | glucan 1,3-beta-glucosidase Exg2                           | 1.60 |
| SPBC32F12.03c |              | DUF1769 family protein                              |                                                            | 1.60 |
| SPAC17G8.12   | <i>cut4</i>  | anaphase-promoting complex subunit Apc1             | anaphase-promoting complex subunit Apc1                    | 1.60 |
| SPAC644.11c   | <i>csx1</i>  | RNA-binding protein Csx1                            | RNA-binding protein Csx1                                   | 1.60 |
| SPBC20F10.02c | <i>sid2</i>  | Sid2p-Mob1p kinase complex subunit Sid2             | Sid2p-Mob1p kinase complex                                 | 1.60 |
| SPCC1753.02c  | <i>uba5</i>  | NEDD8 activating enzyme (predicted)                 | NEDD8 activating enzyme (predicted)                        | 1.60 |
| SPAC21E11.03c | <i>mug33</i> | conserved fungal protein                            | conserved fungal protein                                   | 1.60 |
| SPCC191.04c   | <i>ctr5</i>  | copper transporter complex subunit Ctr5 (predicted) | copper transporter complex subunit Ctr5 (predicted)        | 1.60 |
| SPAC4G8.12c   | <i>sxa2</i>  | serine carboxypeptidase Sxa2                        | serine carboxypeptidase Sxa2                               | 1.59 |
| SPBC106.09    | <i>pvg2</i>  | galactose residue biosynthesis protein Pvg2         | galactose residue biosynthesis protein Pvg2                | 1.59 |
| SPAC1F3.10c   | <i>sec18</i> | secretory pathway protein Sec18 (predicted)         | secretory pathway protein Sec18 (predicted)                | 1.59 |
| SPBC3H7.02    | <i>otu1</i>  | ubiquitin-specific protease (predicted)             | ubiquitin-specific protease (predicted)                    | 1.59 |
| SPACUNK4.17   |              | sequence orphan                                     | sequence orphan                                            | 1.59 |
| SPBC887.18c   | <i>jmj1</i>  | Jmj1 protein                                        | Jmj1 protein                                               | 1.59 |
| SPBC2D10.05   | <i>ctr4</i>  | copper transporter complex subunit Ctr4             | copper transporter complex subunit Ctr4 (PMID 11274192)    | 1.59 |
| SPCC1919.10c  | <i>vti1</i>  | SNARE Vti1                                          |                                                            | 1.59 |
| SPBC1198.13c  | <i>tfa2</i>  | transcription factor TFIIE beta subunit Tfa2        | transcription factor TFIIE beta subunit Tfa2               | 1.59 |
| SPAC23H3.04   | <i>arg3</i>  | ornithine carbamoyltransferase Arg3                 | ornithine carbamoyltransferase Arg3                        | 1.59 |
| SPBC19C7.03   |              | CASP family protein                                 | CASP family protein                                        | 1.59 |
| SPAC8C9.03    |              | spermidine family transporter (predicted)           |                                                            | 1.59 |
| SPBC3E7.08c   | <i>tmp1</i>  | thymidylate kinase Tmp1                             | thymidylate kinase Tmp1                                    | 1.58 |
| SPAC24C9.13c  |              | steroid dehydrogenase (predicted)                   | steroid dehydrogenase (predicted)                          | 1.58 |
| SPAC869.08    | <i>vip1</i>  | RNA-binding protein Vip1                            | RNA-binding protein Vip1                                   | 1.58 |
| SPBPJ4664.03  | <i>snf22</i> | ATP-dependent DNA helicase Snf22                    | ATP-dependent DNA helicase Snf22                           | 1.58 |
| SPCC162.03    | <i>rad4</i>  | BRCT domain protein Rad4                            | BRCT domain protein Rad4                                   | 1.58 |
| SPAC4F10.17   |              | histone promoter control protein Hpc2 (predicted)   |                                                            | 1.58 |
| SPAC20H4.02   | <i>mek1</i>  | Cds1/Rad53/Chk2 family protein kinase Mek1          | Cds1/Rad53/Chk2 family protein kinase Mek1 (PMID 12482912) | 1.58 |
| SPAC1B3.06c   |              | B13958 domain                                       | B13958 domain                                              | 1.58 |

|              |              |                                                                  |                                                                                    |      |
|--------------|--------------|------------------------------------------------------------------|------------------------------------------------------------------------------------|------|
| SPBC649.03   | <i>gtr2</i>  | Gtr1/RagA G protein Gtr2                                         | Gtr1/RagA G protein Gtr2                                                           | 1.58 |
| SPAC3A11.05c |              | conserved protein (fungal and plant)                             |                                                                                    | 1.58 |
| SPAC23C4.05c |              | nitrogen permease regulator family                               | nitrogen permease regulator family                                                 | 1.58 |
| SPAC186.04c  | <i>spo5</i>  | meiotic RNA-binding protein 1                                    | meiotic RNA-binding protein 1                                                      | 1.58 |
| SPBC713.08   | <i>sdh2</i>  | succinate dehydrogenase (ubiquinone) iron-sulfur protein subunit | succinate dehydrogenase (ubiquinone) iron-sulfur protein subunit                   | 1.57 |
| SPBC1D7.05   |              | ski complex interacting GTPase (predicted)                       | ski complex subunit Ski7 (predicted)                                               | 1.57 |
| SPCC132.04c  | <i>bet1</i>  | SNARE Bet1                                                       | SNARE Bet1                                                                         | 1.57 |
| SPBC1778.10c |              | nuclease                                                         |                                                                                    | 1.57 |
| SPAC630.05   | <i>dad1</i>  | DASH complex subunit Dad1                                        | DASH complex subunit Dad1                                                          | 1.57 |
| SPBC660.07   |              | membrane bound O-acyltransferase, MBOAT (predicted)              |                                                                                    | 1.57 |
| SPAC7D4.09c  | <i>mak1</i>  | histidine kinase Mak1                                            | histidine kinase Mak1                                                              | 1.57 |
| SPAC688.04c  | <i>nak1</i>  | PAK-related kinase Nak1                                          |                                                                                    | 1.57 |
| SPCC1672.08c | <i>srx1</i>  | sulfiredoxin                                                     | sulphiredoxin (PMID 15824112)                                                      | 1.57 |
| SPBP18G5.02  |              | clathrin binding protein                                         |                                                                                    | 1.57 |
| SPAC1039.06  | <i>cob1</i>  | cytochrome b, Cob1                                               | cytochrome b; respiratory chain complex III; similar to <i>S. cerevisiae</i> Q0105 | 1.57 |
| SPCC757.07c  |              | Pex16 family peroxisome import protein                           |                                                                                    | 1.57 |
| SPAC31G5.15  | <i>lkh1</i>  | dual specificity protein kinase Lkh1                             | dual specificity protein kinase Lkh1                                               | 1.56 |
| SPAC1486.01  | <i>dga1</i>  | diacylglycerol O-acyltransferase                                 |                                                                                    | 1.56 |
| SPCC1919.12c |              | uracil phosphoribosyltransferase (predicted)                     | uracil phosphoribosyltransferase (predicted)                                       | 1.56 |
| SPBC1734.08  |              | mitochondrial ribosomal protein subunit S37 (predicted)          | mitochondrial ribosomal protein subunit S37 (predicted)                            | 1.56 |
| SPBC31F10.02 | <i>cyk3</i>  | cytokinesis protein Cyk3                                         | cytokinesis protein Cyk3                                                           | 1.56 |
| SPAC607.09c  |              | alpha-glucosidase                                                | alpha-glucosidase                                                                  | 1.56 |
| SPCC16A11.01 |              | mitochondrial Mvp17/PMP22 family protein 2                       | Mvp17/PMP22 family                                                                 | 1.56 |
| SPBC1773.09c | <i>pso2</i>  | DNA 5' exonuclease (predicted)                                   | DNA 5' exonuclease (predicted)                                                     | 1.56 |
| SPAC1952.04c | <i>ste20</i> | sterility protein Ste20                                          |                                                                                    | 1.56 |
| SPAC3A12.08  | <i>rhb1</i>  | Rheb GTPase Rhb1                                                 | Rheb GTPase Rhb1                                                                   | 1.56 |
| SPCC1235.06  | <i>scd1</i>  | RhoGEF Scd1                                                      | RhoGEF Scd1                                                                        | 1.56 |
| SPAC1002.21  | <i>mde5</i>  | alpha-amylase homolog Mde5                                       | alpha-amylase homolog Mde5                                                         | 1.56 |
| SPAC22E12.15 | <i>tsc2</i>  | tuberin                                                          | tuberin                                                                            | 1.55 |
| SPAC17A2.07c |              | sodium/calcium exchanger (predicted)                             | sodium/calcium exchanger (predicted)                                               | 1.55 |

|                |              |                                                                             |                                                             |      |
|----------------|--------------|-----------------------------------------------------------------------------|-------------------------------------------------------------|------|
| SPAP27G11.12   | <i>aar2</i>  | U5 snRNP-associated protein Aar2                                            | U5 snRNP-associated protein Aar2                            | 1.55 |
| SPCC188.12     | <i>vps32</i> | vacuolar sorting protein Vps32                                              | vacuolar sorting protein Vps32                              | 1.55 |
| SPAC12D12.09   | <i>gwt1</i>  | pig-W                                                                       | pig-W                                                       | 1.55 |
| SPBC1198.01    | <i>yam8</i>  | calcium transport protein                                                   | calcium transport protein                                   | 1.55 |
| SPBC83.12      | <i>dcp2</i>  | mRNA decapping complex subunit Dcp2                                         | mRNA decapping complex subunit Dcp2                         | 1.55 |
| SPBC1709.09    | <i>abc3</i>  | ABC transporter Abc3                                                        | ABC transporter Abc3                                        | 1.55 |
| SPCC191.11     |              | pseudogene                                                                  | pseudogene                                                  | 1.55 |
| SPAC1142.05    |              | cleavage and polyadenylation specificity factor (predicted)                 | cleavage and polyadenylation specificity factor (predicted) | 1.55 |
| SPAC105.01c    |              | WIP homolog                                                                 | WIP homolog                                                 | 1.55 |
| SPAC4F10.07c   | <i>alp4</i>  | gamma tubulin complex Spc97/GCP2 subunit Alp4                               |                                                             | 1.54 |
| SPCC1840.12    |              | dubious                                                                     | dubious                                                     | 1.54 |
| SPCC11E10.02c  | <i>uap2</i>  | U2 snRNP-associated protein Uap2                                            |                                                             | 1.54 |
| SPBC1105.13c   | <i>ssp2</i>  | serine/threonine protein kinase Ssp2                                        | serine/threonine protein kinase Ssp2                        | 1.54 |
| SPAC1782.01    |              | DUF1741 family protein                                                      |                                                             | 1.54 |
| SPBC2G2.17c    |              | membrane transporter                                                        |                                                             | 1.54 |
| SPAC56E4.06c   | <i>mug77</i> | autophagy associated protein Atg5 (predicted)                               |                                                             | 1.54 |
| SPAPB17E12.04c |              | tyrosine-tRNA ligase                                                        | tyrosine-tRNA ligase                                        | 1.54 |
| SPBC16D10.04c  | <i>ubp22</i> | ubiquitin C-terminal hydrolase Ubp22                                        | ubiquitin C-terminal hydrolase Ubp22                        | 1.54 |
| SPAC11D3.01c   |              | hydroxyacid dehydrogenase (predicted)                                       | hydroxyacid dehydrogenase (predicted)                       | 1.54 |
| SPAC23H3.13c   | <i>cwf24</i> | zf-C3HC4 type (RING finger)/GCN5-related N acetyltransferase fusion protein |                                                             | 1.54 |
| SPCC830.02     |              | dubious                                                                     | dubious                                                     | 1.53 |
| SPAC24B11.05   | <i>dna2</i>  | DNA replication endonuclease-helicase Dna2                                  |                                                             | 1.53 |
| SPCC306.08c    |              | DUF953 family protein                                                       |                                                             | 1.53 |
| SPBC23G7.10c   |              | mitochondrial DNA binding protein (predicted)                               |                                                             | 1.53 |
| SPBC1718.01    |              | aconitate hydratase                                                         | aconitate hydratase                                         | 1.53 |
| SPBC651.05c    |              | mitochondrial membrane protein complex assembly protein                     |                                                             | 1.53 |
| SPAC2E1P3.04   |              | 2-methylbutyraldehyde reductase (predicted)                                 | 2-methylbutyraldehyde reductase (predicted)                 | 1.53 |
| SPCC736.05     |              | conserved eukaryotic protein                                                |                                                             | 1.53 |

|               |              |                                                                      |                                                                      |      |
|---------------|--------------|----------------------------------------------------------------------|----------------------------------------------------------------------|------|
| SPBC1289.02c  |              | sequence orphan                                                      |                                                                      | 1.53 |
| SPAC1142.07c  |              | calcipressin                                                         |                                                                      | 1.53 |
| SPCC1450.01c  |              | urease accessory protein UREG<br>(predicted)                         | urease accessory protein UREG<br>(predicted)                         | 1.53 |
| SPCC18.09c    | <i>ndc80</i> | spindle pole body protein Ndc80                                      |                                                                      | 1.53 |
| SPAC15A10.06  |              | oxysterol binding protein (predicted)                                | oxysterol binding protein (predicted)                                | 1.53 |
| SPAC32A11.01  | <i>myo52</i> | myosin type V                                                        | myosin type V                                                        | 1.52 |
| SPBP8B7.24c   | <i>rad13</i> | DNA repair nuclease Rad13                                            |                                                                      | 1.52 |
| SPBC215.07c   |              | WD repeat protein, human WDR70 family                                | WD repeat protein, human WDR70<br>family                             | 1.52 |
| SPBC83.05     | <i>atp5</i>  | F0-ATPase delta subunit                                              | F0-ATPase delta subunit                                              | 1.52 |
| SPAP11E10.02c |              | chromosome segregation protein                                       | chromosome segregation protein                                       | 1.52 |
| SPBC29A10.04  |              | conjugation protein (predicted)                                      | conserved fungal protein                                             | 1.52 |
| SPAC27D7.08c  | <i>hrr1</i>  | Helicase Required for RNAi-mediated<br>heterochromatin assembly Hrr1 | Helicase Required for RNAi-mediated<br>heterochromatin assembly Hrr1 | 1.52 |
| SPAC6F6.12    | <i>amt3</i>  | ammonium transporter Amt3                                            | ammonium transporter Amt3                                            | 1.52 |
| SPBC6B1.09c   |              | PWWP domain protein                                                  |                                                                      | 1.52 |
| SPAC22F3.13   |              | mitochondrial pyruvate dehydrogenase<br>(lipoamide) kinase           | pyruvate dehydrogenase (lipoamide)<br>kinase                         | 1.51 |
| SPAC1296.03c  |              | CDC50 domain protein                                                 |                                                                      | 1.51 |
| SPAC31G5.18c  |              | proteasome component                                                 | proteasome component                                                 | 1.51 |
| SPBC3B9.17    | <i>sft2</i>  | Golgi transport protein Sft2 (predicted)                             | Golgi transport protein Sft2 (predicted)                             | 1.51 |
| SPAC6F6.16c   |              | sequence orphan                                                      |                                                                      | 1.51 |
| SPAC1F7.09c   |              | spindle pole body interacting protein<br>(predicted)                 |                                                                      | 1.51 |
| SPBC215.10    |              | mitochondrial splicing suppressor<br>(predicted)                     | mitochondrial splicing suppressor<br>(predicted)                     | 1.51 |
| SPBC13E7.10c  | <i>gpi17</i> | pig-S                                                                | pig-S                                                                | 1.51 |
| SPBC1773.13   | <i>mes1</i>  | meiosis II protein Mes1                                              | meiosis II protein Mes1                                              | 1.51 |
| SPBC713.09    | <i>snx12</i> | sorting nexin Snx12 (predicted)                                      | sorting nexin Snx12 (predicted)                                      | 1.51 |
| SPAC17G6.03   | <i>sec71</i> | Sec7 domain                                                          | Sec7 domain                                                          | 1.51 |
| SPCC1223.03c  |              | metaxin 1                                                            | metaxin 1                                                            | 1.51 |
| SPCC970.09    |              | NAD binding dehydrogenase family<br>protein                          |                                                                      | 1.51 |
| SPAC23C4.13   | <i>psm1</i>  | mitotic cohesin complex subunit Psm1                                 |                                                                      | 1.51 |
| SPAC688.03c   |              | ORMDL family protein                                                 |                                                                      | 1.51 |
| SPAC1751.01c  |              | sequence orphan                                                      |                                                                      | 1.50 |

|              |             |                                                                  |                                                                  |      |
|--------------|-------------|------------------------------------------------------------------|------------------------------------------------------------------|------|
| SPMIT.01     |             | S. pombe specific DUF999 protein family 5                        | S. pombe specific DUF999 protein family 5                        | 1.50 |
| SPAC959.09c  | <i>vtc4</i> | vacuolar transporter chaperone (VTC) complex subunit (predicted) | vacuolar transporter chaperone (VTC) complex subunit (predicted) | 1.50 |
| SPBC1539.02  |             | aspartate aminotransferase (predicted)                           | aspartate aminotransferase (predicted)                           | 1.50 |
| SPBC1773.02c | <i>app1</i> | App1 protein                                                     | App1 protein                                                     | 1.50 |
| SPCC306.06c  | <i>pho2</i> | 4-nitrophenylphosphatase                                         |                                                                  | 1.50 |
| SPCC162.04c  | <i>srb8</i> | mediator complex subunit Srb8                                    | mediator complex subunit Srb8 (PMID 12738880)                    | 1.50 |
| SPBC31E1.01c | <i>php3</i> | CCAAT-binding factor complex subunit Php3                        | CCAAT-binding factor complex subunit Php3 (PMID 8223474)         | 1.50 |
| SPCC1620.14c |             | sequence orphan                                                  | sequence orphan                                                  | 1.50 |

---
