# Supplementary material for: The Fission Yeast GATA Factor, Gaf1, Modulates Sexual Development via Direct Down-Regulation of ste11+ Expression in Response to Nitrogen Starvation
Source: PubMed Central journal article supplement (PMC3416868; doi:10.1371/journal.pone.0042409), 2012-08-10
Supplement: pone.0042409.s004.pdf [file pone.0042409.s004.pdf]

Table S4. List of the genes in Subgroup A

\* 61 genes

| Systematic    | Gene name    | Description (GeneDB)                              | Description (FunCat2)                          | Expression Ratio          |                        |                              |
|---------------|--------------|---------------------------------------------------|------------------------------------------------|---------------------------|------------------------|------------------------------|
|               |              |                                                   |                                                | (gaf1Δ, +N)<br>/ (WT, +N) | (WT, -N)<br>/ (WT, +N) | (gaf1Δ, -N)<br>/ (gaf1Δ, +N) |
| SPBC947.05c   |              | ferric-chelate reductase (predicted)              |                                                | 53.02                     | 1.46                   | 0.54                         |
| SPAC1F7.08    | <i>fio1</i>  | iron transport multicopper oxidase Fio1           | iron transport multicopper oxidase Fio1        | 16.51                     | 0.79                   | 0.88                         |
| SPAC1F7.07c   | <i>fip1</i>  | iron permease Fip1                                | iron permease Fip1                             | 15.96                     | 0.99                   | 0.95                         |
| SPBCPT2R1.08c | <i>tlh2</i>  | RecQ type DNA helicase Tlh1                       |                                                | 10.69                     | 1.39                   | 0.81                         |
| SPAC4G8.15c   |              |                                                   | dubious                                        | 8.70                      | 0.60                   | 0.59                         |
| SPAC8E11.06   |              | sequence orphan                                   | sequence orphan                                | 4.46                      | 1.41                   | 0.59                         |
| SPAC212.02    |              | sequence orphan                                   | sequence orphan                                | 4.41                      | 1.43                   | 0.03                         |
| SPAC8C9.12c   |              | iron ion transporter (predicted)                  | iron ion transporter (predicted)               | 3.48                      | 0.41                   | 0.62                         |
| SPAC22F8.03c  |              | sequence orphan                                   | sequence orphan                                | 3.12                      | 1.00                   | 0.36                         |
| SPCC330.03c   |              | NADPH-hemoprotein reductase                       | NADPH-hemoprotein reductase                    | 2.97                      | 1.44                   | 0.39                         |
| SPBC27B12.03c |              | lathosterol oxidase (predicted)                   |                                                | 2.76                      | 0.86                   | 0.70                         |
| SPAC869.05c   |              | sulfate transporter (predicted)                   | sulfate transporter (predicted)                | 2.72                      | 1.19                   | 0.88                         |
| SPBC1711.14   | <i>rec15</i> | meiotic recombination protein Rec15               |                                                | 2.69                      | 1.01                   | 0.75                         |
| SPBC12C2.14c  |              | dubious                                           |                                                | 2.45                      | 0.82                   | 0.89                         |
| SPBC16E9.01c  | <i>php4</i>  | CCAAT-binding factor complex subunit<br>Php4      |                                                | 2.45                      | 0.86                   | 1.00                         |
| SPBC4F6.09    | <i>str1</i>  | siderophore-iron transporter Str1                 |                                                | 2.42                      | 1.42                   | 1.09                         |
| SPAC343.07    | <i>mug28</i> | RNA-binding protein Mug28                         | RNA-binding protein Mug28                      | 2.41                      | 0.19                   | 0.83                         |
| SPAC212.09c   |              | pseudogene                                        | pseudogene                                     | 2.35                      | 1.11                   | 0.88                         |
| SPCC13B11.02c |              | sequence orphan                                   | sequence orphan                                | 2.30                      | 0.97                   | 0.26                         |
| SPBC428.07    | <i>meu6</i>  | meiotic chromosome segregation protein<br>Meu6    | meiotic chromosome segregation protein<br>Meu6 | 2.18                      | 0.67                   | 0.61                         |
| SPAC5H10.07   |              | sequence orphan                                   | sequence orphan                                | 2.16                      | 0.89                   | 0.24                         |
| SPBPJ4664.01  | <i>dps1</i>  | decaprenyl diphosphate synthase subunit<br>Dps1   |                                                | 2.16                      | 1.44                   | 1.49                         |
| SPBC1271.06c  | <i>mug96</i> | sequence orphan                                   | sequence orphan                                | 2.14                      | 0.49                   | 0.16                         |
| SPBC83.19c    |              | sequence orphan                                   |                                                | 2.13                      | 0.58                   | 1.45                         |
| SPAC6B12.16   | <i>meu26</i> | conserved fungal protein                          | conserved fungal protein                       | 1.99                      | 1.46                   | 0.69                         |
| SPBC216.02    | <i>mcp5</i>  | cortical anchoring factor for dynein<br>Mcp5/Num1 |                                                | 1.99                      | 1.33                   | 1.11                         |

|               |              |                                                                  |                                                         |      |      |      |
|---------------|--------------|------------------------------------------------------------------|---------------------------------------------------------|------|------|------|
| SPAC750.01    |              | pseudogene                                                       | pseudogene                                              | 1.96 | 0.26 | 0.17 |
| SPCC417.12    |              | carboxylesterase-lipase family (predicted)                       | carboxylesterase-lipase family (predicted)              | 1.95 | 0.84 | 0.49 |
| SPAC343.20    |              | sequence orphan                                                  | sequence orphan                                         | 1.91 | 0.89 | 0.90 |
| SPCC622.13c   | <i>tti1</i>  | Tel Two Interacting protein 1                                    | conserved eukaryotic protein                            | 1.91 | 1.21 | 0.76 |
| SPAC227.13c   | <i>isu1</i>  | mitochondrial iron-sulfur cluster assembly scaffold protein Isu1 | iron-sulfur cluster assembly scaffold protein Isu1      | 1.84 | 1.05 | 0.80 |
| SPAC14C4.08   | <i>mug5</i>  | meiotically upregulated gene Mug5                                | meiotically upregulated gene Mug5                       | 1.80 | 1.32 | 1.19 |
| SPAC25G10.04c | <i>rec10</i> | meiotic recombination protein Rec10                              | meiotic recombination protein Rec10 (PMID 7586030)      | 1.79 | 0.65 | 1.45 |
| SPCC61.01c    | <i>str2</i>  | siderophore-iron transporter Str2                                |                                                         | 1.78 | 1.43 | 1.17 |
| SPAPB18E9.03c |              |                                                                  | dubious                                                 | 1.78 | 0.77 | 0.35 |
| SPCC622.12c   |              | NADP-specific glutamate dehydrogenase (predicted)                | NADP-specific glutamate dehydrogenase (predicted)       | 1.76 | 1.22 | 0.83 |
| SPAPB8E5.08   |              | sequence orphan                                                  | sequence orphan                                         | 1.76 | 0.35 | 0.46 |
| SPAC23D3.12   |              | inorganic phosphate transporter (predicted)                      | inorganic phosphate transporter (predicted)             | 1.73 | 1.00 | 1.34 |
| SPBPB2B2.08   |              | conserved fungal protein                                         |                                                         | 1.71 | 0.37 | 0.35 |
| SPBC29A10.12  |              | HMG-box variant                                                  |                                                         | 1.69 | 0.51 | 0.48 |
| SPAC15A10.10  | <i>mde6</i>  | Muskelin homolog                                                 | Muskelin homolog                                        | 1.68 | 0.98 | 0.90 |
| SPBC12C2.03c  |              | FAD binding protein (predicted)                                  |                                                         | 1.66 | 0.61 | 1.27 |
| SPBC36.02c    |              | spermidine family transporter (predicted)                        |                                                         | 1.65 | 1.03 | 1.13 |
| SPBC19C7.05   |              | cell wall organization protein (predicted)                       |                                                         | 1.61 | 0.40 | 0.74 |
| SPCC645.12c   |              | sequence orphan                                                  | sequence orphan                                         | 1.58 | 1.03 | 0.59 |
| SPAC869.02c   |              | nitric oxide dioxygenase (predicted)                             | nitric oxide dioxygenase (predicted)                    | 1.57 | 0.57 | 0.41 |
| SPAC890.02c   | <i>alp7</i>  | TACC homolog (predicted)                                         | TACC homolog (predicted) (PMID 14742702)                | 1.57 | 1.42 | 0.72 |
| SPAC25B8.02   | <i>sds3</i>  | Clr6 histone deacetylase complex subunit Sds3 (predicted)        | histone deacetylase complex subunit Sds3 (predicted)    | 1.57 | 0.96 | 1.04 |
| SPCC13B11.04c |              | glutathione-dependent formaldehyde dehydrogenase (predicted)     |                                                         | 1.57 | 1.36 | 1.49 |
| SPAC688.06c   | <i>slx4</i>  | structure-specific endonuclease subunit                          | structure-specific endonuclease subunit (PMID 14528010) | 1.56 | 1.38 | 1.27 |
| SPBC115.03    |              | gfo/idh/mocA family oxidoreductase (predicted)                   | gfo/idh/mocA family oxidoreductase (predicted)mito      | 1.56 | 0.51 | 0.69 |
| SPAC5H10.04   |              | NADPH dehydrogenase (predicted)                                  | NADPH dehydrogenase (predicted)                         | 1.56 | 0.65 | 0.80 |
| SPBC530.02    |              | membrane transporter                                             |                                                         | 1.55 | 0.86 | 1.11 |
| SPBC1198.07c  |              | mannan endo-1,6-alpha-mannosidase (predicted)                    | mannan endo-1,6-alpha-mannosidase (predicted)           | 1.55 | 0.80 | 0.77 |

|              |              |                                                    |                                   |      |      |      |
|--------------|--------------|----------------------------------------------------|-----------------------------------|------|------|------|
| SPCC584.16c  |              | sequence orphan                                    | sequence orphan                   | 1.54 | 1.20 | 1.02 |
| SPCC417.04   |              | dubious                                            | dubious                           | 1.54 | 1.41 | 1.41 |
| SPAC3A12.18  | <i>zwf1</i>  | glucose-6-phosphate 1-dehydrogenase<br>(predicted) |                                   | 1.53 | 1.34 | 0.76 |
| SPBC119.14   | <i>rti1</i>  | Rad22 homolog Rti1                                 |                                   | 1.53 | 0.90 | 1.24 |
| SPCC126.14   | <i>prp18</i> | U5 snRNP-associated protein Prp18                  | U5 snRNP-associated protein Prp18 | 1.52 | 1.37 | 1.16 |
| SPBCPT2R1.02 |              | sequence orphan                                    |                                   | 1.51 | 0.37 | 0.45 |
| SPCC1322.03  |              | TRP-like ion channel                               | TRP-like ion channel              | 1.50 | 1.06 | 1.25 |

---
