# Supplementary material for: The Fission Yeast GATA Factor, Gaf1, Modulates Sexual Development via Direct Down-Regulation of ste11+ Expression in Response to Nitrogen Starvation
Source: PubMed Central journal article supplement (PMC3416868; doi:10.1371/journal.pone.0042409), 2012-08-10
Supplement: pone.0042409.s005.pdf [file pone.0042409.s005.pdf]

Table S5. List of the genes in Subgroup B

\* 56 genes

| Systematic    | Gene name    | Description (GeneDB)                                         | Description (FunCat2)                                        | Expression Ratio          |                        |                              |
|---------------|--------------|--------------------------------------------------------------|--------------------------------------------------------------|---------------------------|------------------------|------------------------------|
|               |              |                                                              |                                                              | (gaf1Δ, +N)<br>/ (WT, +N) | (WT, -N)<br>/ (WT, +N) | (gaf1Δ, -N)<br>/ (gaf1Δ, +N) |
| SPAC1F8.02c   |              | sequence orphan                                              | sequence orphan                                              | 456.13                    | 32.13                  | 0.68                         |
| SPAC1F8.03c   | <i>str3</i>  | siderophore-iron transporter Str3                            | siderophore-iron transporter Str3 (PMID 12888492)            | 263.49                    | 5.31                   | 1.11                         |
| SPBC1683.09c  | <i>frp1</i>  | ferric-chelate reductase Frp1                                | ferric-chelate reductase Frp1                                | 238.52                    | 2.72                   | 0.89                         |
| SPAC4H3.12c   |              | dubious                                                      | sequence orphan                                              | 23.87                     | 14.75                  | 0.28                         |
| SPCC1620.04c  | <i>mug55</i> | Cdc20/Fizzy family WD repeat protein                         | Cdc20/Fizzy family WD repeat protein                         | 12.00                     | 10.40                  | 0.93                         |
| SPBPB21E7.04c |              | S-adenosylmethionine-dependent methyltransferase (predicted) | S-adenosylmethionine-dependent methyltransferase (predicted) | 8.09                      | 8.44                   | 0.55                         |
| SPCC63.13     |              | DNAJ domain protein                                          | DNAJ domain protein                                          | 7.97                      | 7.81                   | 0.88                         |
| SPAC23G3.03   | <i>sib2</i>  | ornithine N5 monooxygenase (predicted)                       | ornithine N5 monooxygenase (predicted)                       | 6.79                      | 2.50                   | 0.79                         |
| SPBPB21E7.05  |              | sequence orphan                                              | sequence orphan                                              | 4.94                      | 3.29                   | 0.43                         |
| SPAP27G11.08c | <i>meu32</i> | sequence orphan                                              | sequence orphan                                              | 4.42                      | 4.48                   | 1.28                         |
| SPBC2F12.09c  | <i>atf21</i> | transcription factor Atf21                                   |                                                              | 4.39                      | 3.03                   | 0.17                         |
| SPAC13D6.01   | <i>pof14</i> | F-box protein Pof14                                          | F-box protein Pof14                                          | 4.28                      | 2.52                   | 1.34                         |
| SPBC106.02c   | <i>srx1</i>  | sulfiredoxin                                                 | sulphiredoxin (PMID 15824112)                                | 4.27                      | 1.57                   | 1.24                         |
| SPCC757.02c   |              | epimarase (predicted)                                        | epimarase (predicted)                                        | 4.03                      | 47.03                  | 1.08                         |
| SPAC212.06c   |              | pseudogene                                                   | pseudogene                                                   | 3.91                      | 1.68                   | 0.49                         |
| SPAC1002.21   |              | sequence orphan                                              | sequence orphan                                              | 3.67                      | 6.58                   | 0.89                         |
| SPBC359.05    | <i>abc3</i>  | ABC transporter Abc3                                         | ABC transporter Abc3                                         | 3.60                      | 1.55                   | 0.86                         |
| SPAC1002.06c  | <i>bqt2</i>  | bouquet formation protein Bqt2                               | bouquet formation protein Bqt2                               | 3.55                      | 4.60                   | 1.38                         |
| SPCC1393.10   | <i>ctr4</i>  | copper transporter complex subunit Ctr4                      | copper transporter complex subunit Ctr4 (PMID 11274192)      | 3.53                      | 1.59                   | 0.42                         |
| SPBP4G3.03    |              | PI31 proteasome regulator related                            |                                                              | 3.32                      | 40.76                  | 1.35                         |
| SPAC1A6.11    |              | dubious                                                      | dubious                                                      | 3.29                      | 2.30                   | 0.66                         |
| SPCC737.04    |              | S. pombe specific UPF0300 family protein 6                   | S. pombe specific UPF0300 family protein 6                   | 3.14                      | 2.75                   | 1.23                         |
| SPCC1020.03   |              | mitochondrial iron ion transporter                           | mitochondrial iron ion transporter                           | 2.99                      | 1.86                   | 1.21                         |
| SPAC23G3.02c  | <i>sib1</i>  | ferrichrome synthetase Sib1                                  | ferrichrome synthetase Sib1                                  | 2.79                      | 2.49                   | 1.28                         |

|              |                |                                                          |                                                          |      |        |      |
|--------------|----------------|----------------------------------------------------------|----------------------------------------------------------|------|--------|------|
| SPAC15E1.07c | <i>moa1</i>    | meiotic cohesin complex associated protein Moa1          | meiotic cohesin complex associated protein Moa1          | 2.75 | 2.94   | 0.39 |
| SPAC323.07c  |                | MatE family transporter                                  | MatE family transporter                                  | 2.43 | 2.47   | 1.32 |
| SPAC186.07c  |                | hydroxyacid dehydrogenase (predicted)                    | hydroxyacid dehydrogenase (predicted)                    | 2.38 | 1.54   | 0.58 |
| SPBC8D2.19   | <i>mde3</i>    | serine/threonine protein kinase Mde3                     |                                                          | 2.37 | 1.93   | 0.22 |
| SPAC9G1.09   | <i>sid1</i>    | PAK-related kinase Sid1                                  | PAK-related kinase Sid1                                  | 2.27 | 2.16   | 0.75 |
| SPAC869.03c  |                | urea transporter (predicted)                             | urea transporter (predicted)                             | 2.26 | 1.65   | 0.47 |
| SPCC1442.11c |                | sequence orphan                                          | sequence orphan                                          | 2.20 | 2.30   | 1.11 |
| SPBC887.17   |                | uracil permease (predicted)                              |                                                          | 2.20 | 1.85   | 1.32 |
| SPAC977.13c  |                | hydrolase                                                |                                                          | 2.18 | 6.80   | 1.37 |
| SPBC215.04   | <i>git11</i>   | heterotrimeric G protein gamma subunit Git11             |                                                          | 2.11 | 2.74   | 0.75 |
| SPBC1683.12  |                | nicotinic acid plasma membrane transporter (predicted)   | nicotinic acid plasma membrane transporter (predicted)   | 2.05 | 2.05   | 1.39 |
| SPCC338.02   | <i>mug112</i>  | sequence orphan                                          | sequence orphan                                          | 1.97 | 3.48   | 0.51 |
| SPBPB2B2.18  |                | sequence orphan                                          |                                                          | 1.97 | 3.29   | 1.22 |
| SPAC11D3.17  |                | zf-C2H2 type zinc finger protein                         | zinc finger protein                                      | 1.93 | 4.23   | 0.83 |
| SPBC16G5.19  |                | sequence orphan                                          |                                                          | 1.92 | 2.00   | 0.43 |
| SPBPB21E7.07 | <i>aes1</i>    | enhancer of RNA-mediated gene silencing                  | enhancer of RNA-mediated gene silencing (PMID 12034844)  | 1.92 | 7.14   | 1.10 |
| SPAC24C9.15c | <i>spn5</i>    | septin Spn5                                              | septin Spn5                                              | 1.91 | 1.72   | 1.27 |
| SPBC1271.07c |                | N-acetyltransferase (predicted)                          | N-acetyltransferase (predicted)                          | 1.90 | 7.55   | 0.56 |
| SPAC1751.04  |                | sequence orphan                                          | sequence orphan                                          | 1.86 | 2.59   | 0.62 |
| SPACUNK4.15  |                | 2',3'-cyclic-nucleotide 3'-phosphodiesterase (predicted) | 2',3'-cyclic-nucleotide 3'-phosphodiesterase (predicted) | 1.81 | 1.70   | 1.35 |
| SPAP27G11.16 |                | sequence orphan                                          | sequence orphan                                          | 1.80 | 2.14   | 0.98 |
| SPBC23G7.13c |                | urea transporter (predicted)                             |                                                          | 1.80 | 184.12 | 0.51 |
| SPCC63.03    |                | DNAJ domain protein, DNAJC11 family                      | DNAJ domain protein, DNAJC11 family                      | 1.79 | 1.73   | 0.85 |
| SPBC1683.11c |                | isocitrate lyase                                         | isocitrate lyase                                         | 1.73 | 1.84   | 1.24 |
| SPAC1142.05  | <i>ctr5</i>    | copper transporter complex subunit Ctr5 (predicted)      | copper transporter complex subunit Ctr5 (predicted)      | 1.67 | 1.60   | 0.98 |
| SPCC965.12   |                | dipeptidyl aminopeptidase (predicted)                    | dipeptidyl aminopeptidase (predicted)                    | 1.63 | 2.25   | 0.70 |
| SPAC6C3.03c  |                | sequence orphan                                          | sequence orphan                                          | 1.62 | 3.78   | 0.85 |
| SPBC1921.04c |                | sequence orphan                                          |                                                          | 1.59 | 3.10   | 1.28 |
| SPCC70.08c   |                | methyltransferase (predicted)                            | methyltransferase (predicted)                            | 1.53 | 12.02  | 0.84 |
| SPMIT.03     |                | mitochondrial DNA binding endonuclease                   |                                                          | 1.52 | 1.76   | 1.03 |
| SPAC1039.08  |                | serine acetyltransferase (predicted)                     | serine acetyltransferase (predicted)                     | 1.51 | 4.12   | 1.30 |
| SPBC1711.01c | <i>matmi_1</i> | mating-type m-specific polypeptide mi                    |                                                          | 1.50 | 15.00  | 1.33 |
