# Supplementary material for: The Fission Yeast GATA Factor, Gaf1, Modulates Sexual Development via Direct Down-Regulation of ste11+ Expression in Response to Nitrogen Starvation
Source: PubMed Central journal article supplement (PMC3416868; doi:10.1371/journal.pone.0042409), 2012-08-10
Supplement: pone.0042409.s006.pdf [file pone.0042409.s006.pdf]

Table S6. List of the genes in Subgroup C

\* 202 genes

| Systematic    | Gene name    | Description (GeneDB)                                   | Description (FunCat2)                                  | Expression Ratio          |                        |                              |
|---------------|--------------|--------------------------------------------------------|--------------------------------------------------------|---------------------------|------------------------|------------------------------|
|               |              |                                                        |                                                        | (gaf1Δ, +N)<br>/ (WT, +N) | (WT, -N)<br>/ (WT, +N) | (gaf1Δ, -N)<br>/ (gaf1Δ, +N) |
| SPAC23C11.10  |              | conserved eukaryotic protein                           | conserved eukaryotic protein                           | 1.31                      | 2.30                   | 1.32                         |
| SPACUNK4.16c  |              | alpha,alpha-trehalose-phosphate synthase (predicted)   | alpha,alpha-trehalose-phosphate synthase (predicted)   | 1.01                      | 1.74                   | 1.41                         |
| SPAC12B10.11  | <i>exg2</i>  | glucan 1,3-beta-glucosidase Exg2                       | glucan 1,3-beta-glucosidase Exg2                       | 1.03                      | 1.60                   | 1.15                         |
| SPBC8E4.03    |              | agmatinase 2 (predicted)                               |                                                        | 1.06                      | 5.96                   | 0.90                         |
| SPBC3E7.02c   | <i>hsp16</i> | heat shock protein Hsp16                               |                                                        | 1.08                      | 1.67                   | 1.35                         |
| SPCC965.07c   | <i>gst2</i>  | glutathione S-transferase Gst2                         | glutathione S-transferase Gst2                         | 1.35                      | 2.21                   | 1.24                         |
| SPBC15D4.15   | <i>pho2</i>  | 4-nitrophenylphosphatase                               |                                                        | 1.11                      | 1.50                   | 1.05                         |
| SPBC21C3.10c  |              | 5-amino-6-(5-phosphoribosylamino) uracil reductase     |                                                        | 0.98                      | 1.63                   | 1.27                         |
| SPAC323.06c   | <i>uba5</i>  | NEDD8 activating enzyme (predicted)                    | NEDD8 activating enzyme (predicted)                    | 1.06                      | 1.60                   | 1.44                         |
| SPAC24H6.01c  |              | membrane bound O-acyltransferase, MBOAT (predicted)    |                                                        | 0.91                      | 1.57                   | 1.41                         |
| SPBC19F8.01c  | <i>spn7</i>  | septin Spn7                                            |                                                        | 1.09                      | 1.75                   | 1.08                         |
| SPBC1271.14   |              | glutamate N-acetyltransferase (predicted)              | glutamate N-acetyltransferase (predicted)              | 1.02                      | 2.67                   | 1.09                         |
| SPBC31F10.08  | <i>mde2</i>  | Mde2 protein                                           |                                                        | 0.98                      | 2.03                   | 0.79                         |
| SPBC3E7.05c   |              | conserved eukaryotic protein                           |                                                        | 0.87                      | 1.53                   | 1.46                         |
| SPBPB21E7.02c |              | pseudo SPAC5H10.03                                     | pseudo SPAC5H10.03                                     | 1.13                      | 31.49                  | 0.98                         |
| SPBC24C6.07   | <i>cdc14</i> | SIN component Cdc14                                    |                                                        | 0.87                      | 1.64                   | 1.24                         |
| SPAC167.08    | <i>Tf2-2</i> | retrotransposable element                              |                                                        | 0.84                      | 3.23                   | 1.23                         |
| SPBC354.15    | <i>fap1</i>  | L-pipecolate oxidase                                   | L-pipecolate oxidase                                   | 0.94                      | 2.24                   | 1.27                         |
| SPCPB1C11.03  |              | cysteine transporter (predicted)                       | cysteine transporter (predicted)                       | 0.76                      | 3.00                   | 0.89                         |
| SPAC750.04c   |              | dubious                                                |                                                        | 0.95                      | 1.64                   | 0.10                         |
| SPAC3A12.02   |              | inorganic pyrophosphatase                              | inorganic pyrophosphatase                              | 1.31                      | 1.86                   | 1.15                         |
| SPBC725.06c   | <i>ppk31</i> | serine/threonine protein kinase Ppk31 (predicted)      |                                                        | 1.50                      | 1.61                   | 1.45                         |
| SPCC4B3.17    | <i>cbp3</i>  | ubiquinol cytochrome-c reductase assembly protein Cbp3 | ubiquinol cytochrome-c reductase assembly protein Cbp3 | 0.95                      | 1.99                   | 1.37                         |
| SPBC4B4.11    |              | conserved fungal protein                               |                                                        | 1.03                      | 1.68                   | 1.33                         |

|               |              |                                                      |                                                                  |      |       |      |
|---------------|--------------|------------------------------------------------------|------------------------------------------------------------------|------|-------|------|
| SPAC19D5.07   | <i>uga1</i>  | 4-aminobutyrate aminotransferase (GABA transaminase) | 4-aminobutyrate aminotransferase (GABA transaminase) (predicted) | 0.92 | 3.89  | 1.11 |
| SPCC1840.04   |              | caspase                                              | caspase                                                          | 0.98 | 1.85  | 1.50 |
| SPAC688.13    | <i>scn1</i>  | TatD DNase family Scn1                               | TatD DNase family Scn1                                           | 1.03 | 2.00  | 1.49 |
| SPCC70.07c    | <i>tmp1</i>  | thymidylate kinase Tmp1                              | thymidylate kinase Tmp1                                          | 1.02 | 1.58  | 1.15 |
| SPBC1683.06c  |              | uridine ribohydrolase (predicted)                    | uridine ribohydrolase (predicted)                                | 0.69 | 10.11 | 1.49 |
| SPBC2D10.20   | <i>ubc1</i>  | ubiquitin conjugating enzyme Ubc1                    |                                                                  | 1.01 | 1.77  | 1.40 |
| SPAC31F12.01  | <i>zds1</i>  | zds family protein Zds1                              | zds family protein Zds1                                          | 0.97 | 1.64  | 1.46 |
| SPAC664.13    |              | sequence orphan                                      | sequence orphan                                                  | 0.92 | 1.74  | 1.22 |
| SPBC14C8.11c  |              | sequence orphan                                      |                                                                  | 1.43 | 1.89  | 1.16 |
| SPBC8D2.12c   |              | mitochondrial DNA binding protein (predicted)        |                                                                  | 0.98 | 1.53  | 1.43 |
| SPAC6B12.13   |              | protein phosphatase inhibitor (predicted)            | protein phosphatase inhibitor (predicted)                        | 1.02 | 1.91  | 1.24 |
| SPAC24B11.11c | <i>sid2</i>  | Sid2p-Mob1p kinase complex subunit Sid2              | Sid2p-Mob1p kinase complex                                       | 0.84 | 1.60  | 1.49 |
| SPBPB2B2.01   |              | amino acid permease, unknown 12                      |                                                                  | 1.43 | 7.57  | 0.03 |
| SPAPB1A11.02  |              | esterase/lipase (predicted)                          | esterase/lipase (predicted)                                      | 0.35 | 33.62 | 0.95 |
| SPAC1039.07c  |              | aminotransferase class-III                           | 2,2-dialkylglycine decarboxylase (predicted)                     | 1.12 | 2.96  | 1.36 |
| SPCC794.08    |              | HEAT repeat protein, unknown biological role         | HEAT repeat protein, unknown biological role                     | 0.85 | 1.63  | 1.49 |
| SPAC11D3.11c  |              | pseudogene                                           |                                                                  | 1.04 | 1.99  | 1.21 |
| SPBC1683.01   |              | inorganic phosphate transporter (predicted)          | inorganic phosphate transporter (predicted)                      | 0.72 | 1.78  | 1.32 |
| SPAC11D3.07c  |              | transcription factor (predicted)                     | transcription factor                                             | 1.04 | 2.17  | 1.46 |
| SPAC4D7.01c   | <i>sec71</i> | Sec7 domain                                          | Sec7 domain                                                      | 1.04 | 1.51  | 1.42 |
| SPBC26H8.12   |              | cytochrome c heme lyase                              |                                                                  | 0.98 | 2.41  | 1.48 |
| SPBC11B10.07c |              | CDC50 domain protein                                 |                                                                  | 0.96 | 1.51  | 1.40 |
| SPAC1F12.09   | <i>gpi17</i> | pig-S                                                | pig-S                                                            | 0.97 | 1.51  | 1.41 |
| SPAC1093.04c  |              | tRNA nucleotidyltransferase (predicted)              | tRNA nucleotidyltransferase (predicted)                          | 0.83 | 2.02  | 1.38 |
| SPBC1706.01   | <i>tea4</i>  | tip elongation aberrant protein Tea4                 | tip elongation aberrant protein Tea4                             | 0.91 | 1.65  | 1.43 |
| SPAC977.10    | <i>sod2</i>  | CPA1 sodium ion/proton antiporter                    | CPA1 sodium ion/proton antiporter (PMID 8643524)                 | 1.04 | 1.72  | 1.28 |
| SPBC1773.17c  |              | hydroxyacid dehydrogenase (predicted)                |                                                                  | 1.16 | 4.70  | 0.71 |
| SPBC3E7.06c   |              | membrane transporter                                 |                                                                  | 1.18 | 1.54  | 1.36 |
| SPCC1840.06   | <i>atp5</i>  | F0-ATPase delta subunit                              | F0-ATPase delta subunit                                          | 0.91 | 1.52  | 1.36 |

|               |              |                                                                   |                                                                   |      |      |      |
|---------------|--------------|-------------------------------------------------------------------|-------------------------------------------------------------------|------|------|------|
| SPBP8B7.08c   |              | leucine carboxyl methyltransferase (predicted)                    |                                                                   | 1.05 | 1.63 | 1.28 |
| SPAC13G6.05c  |              | TRAPP complex subunit Bet3 (predicted)                            | TRAPP complex subunit Bet3 (predicted)                            | 0.93 | 1.64 | 1.49 |
| SPCC1739.03   | <i>hrr1</i>  | Helicase Required for RNAi-mediated heterochromatin assembly Hrr1 | Helicase Required for RNAi-mediated heterochromatin assembly Hrr1 | 1.17 | 1.52 | 1.33 |
| SPAC25B8.10   |              | trans-aconitate 3-methyltransferase (predicted)                   | trans-aconitate 3-methyltransferase (predicted)                   | 1.14 | 2.22 | 1.44 |
| SPAC3H1.06c   |              | membrane transporter (predicted)                                  | membrane transporter (predicted)                                  | 1.04 | 2.00 | 1.24 |
| SPAPB24D3.08c |              | NADP-dependent oxidoreductase (predicted)                         | NADP-dependent oxidoreductase (predicted)                         | 1.15 | 2.12 | 0.87 |
| SPAC12B10.05  |              | metallopeptidase                                                  | metallopeptidase                                                  | 0.97 | 1.72 | 1.44 |
| SPAC16A10.05c | <i>dad1</i>  | DASH complex subunit Dad1                                         | DASH complex subunit Dad1                                         | 0.97 | 1.57 | 1.05 |
| SPBC1A4.01    | <i>apc10</i> | anaphase-promoting complex subunit Apc10                          |                                                                   | 1.17 | 1.79 | 1.02 |
| SPBC36.12c    | <i>git7</i>  | SGT1-like protein Git7                                            |                                                                   | 1.02 | 1.60 | 1.14 |
| SPAC630.13c   | <i>tsc2</i>  | tuberin                                                           | tuberin                                                           | 0.93 | 1.55 | 1.26 |
| SPBC19C7.09c  | <i>uve1</i>  | endonuclease Uve1                                                 |                                                                   | 0.80 | 2.48 | 1.24 |
| SPAC15A10.01  | <i>atm1</i>  | ABC family iron transporter Atm1                                  | ABC family iron transporter Atm1                                  | 1.01 | 2.97 | 1.40 |
| SPAC3G9.02    | <i>oar2</i>  | 3-oxoacyl-[acyl-carrier-protein] reductase Oar2 (predicted)       | 3-oxoacyl-[acyl-carrier-protein] reductase Oar2 (predicted)       | 1.11 | 1.62 | 1.14 |
| SPAC1805.16c  |              | purine nucleoside phosphorylase (predicted)                       | purine nucleoside phosphorylase (predicted)                       | 0.90 | 2.61 | 1.20 |
| SPCC645.05c   | <i>myo2</i>  | myosin II heavy chain                                             | myosin II heavy chain                                             | 1.06 | 1.67 | 1.35 |
| SPAC1B3.11c   | <i>ypt4</i>  | GTPase Ypt4                                                       | GTPase Ypt4                                                       | 1.00 | 1.95 | 1.34 |
| SPBC20F10.07  |              | GRAM domain protein                                               |                                                                   | 1.05 | 1.75 | 1.47 |
| SPBC19F8.07   | <i>crk1</i>  | cyclin-dependent kinase activating kinase Crk1                    |                                                                   | 1.33 | 3.23 | 1.48 |
| SPBC1289.06c  |              | sequence orphan                                                   |                                                                   | 1.20 | 1.70 | 1.02 |
| SPAC3H5.11    |              | NAD/NADH kinase (predicted)                                       | NAD/NADH kinase (predicted)                                       | 1.04 | 2.05 | 1.33 |
| SPBC1703.09   |              | sequence orphan                                                   |                                                                   | 0.87 | 1.53 | 1.18 |
| SPBC1773.16c  |              | transcription factor (predicted)                                  | transcription factor (predicted)                                  | 1.12 | 2.24 | 1.41 |
| SPAC10F6.13c  |              | aspartate aminotransferase (predicted)                            | aspartate aminotransferase (predicted)                            | 1.07 | 1.50 | 0.73 |
| SPCC1840.09   |              | NAD dependent epimerase/dehydratase family protein                | NAD dependent epimerase/dehydratase family protein                | 0.99 | 2.03 | 1.47 |
| SPAC24C9.14   | <i>otu1</i>  | ubiquitin-specific protease (predicted)                           | ubiquitin-specific protease (predicted)                           | 0.90 | 1.59 | 1.35 |
| SPAC21E11.04  | <i>ppr1</i>  | L-azetidine-2-carboxylic acid acetyltransferase                   | L-azetidine-2-carboxylic acid acetyltransferase (PMID 12761200)   | 1.31 | 7.09 | 0.93 |

|               |               |                                                         |                                                         |      |      |      |
|---------------|---------------|---------------------------------------------------------|---------------------------------------------------------|------|------|------|
| SPBC1604.03c  |               | sequence orphan                                         |                                                         | 0.92 | 1.51 | 1.33 |
| SPBC1703.08c  |               | 5-formyltetrahydrofolate cyclo-ligase                   |                                                         | 1.35 | 3.11 | 0.84 |
| SPAC25B8.09   |               | trans-aconitate 3-methyltransferase (predicted)         | trans-aconitate 3-methyltransferase (predicted)         | 1.11 | 2.41 | 1.23 |
| SPAC824.02    |               | GPI inositol deacylase                                  | GPI inositol deacylase                                  | 1.05 | 2.61 | 1.01 |
| SPAC227.17c   |               | conserved protein (fungal and plant)                    | conserved protein (fungal and plant)                    | 1.14 | 2.92 | 1.13 |
| SPCC188.08c   | <i>ubp22</i>  | ubiquitin C-terminal hydrolase Ubp22                    | ubiquitin C-terminal hydrolase Ubp22                    | 0.95 | 1.54 | 1.39 |
| SPAC186.06    |               | human MAWBP homolog                                     | human MAWBP homolog                                     | 0.81 | 5.22 | 0.60 |
| SPBC582.10c   |               | ATP-dependent DNA helicase Rhp16b (predicted)           | ATP-dependent DNA helicase Rhp16b (predicted)           | 1.06 | 2.32 | 1.30 |
| SPBC27.03     | <i>meu25</i>  | sequence orphan                                         |                                                         | 1.19 | 2.04 | 0.73 |
| SPAC19E9.03   | <i>pas1</i>   | cyclin Pas1                                             | cyclin Pas1                                             | 1.13 | 2.17 | 1.45 |
| SPAC869.10c   |               | proline specific permease (predicted)                   | proline specific permease (predicted)                   | 0.48 | 3.42 | 0.74 |
| SPAC922.03    |               | 1-aminocyclopropane-1-carboxylate deaminase (predicted) | 1-aminocyclopropane-1-carboxylate deaminase (predicted) | 1.04 | 2.36 | 1.42 |
| SPCP20C8.01c  |               | B13958 domain                                           | B13958 domain                                           | 0.78 | 1.58 | 1.24 |
| SPCPB16A4.05c |               | urease accessory protein UREG (predicted)               | urease accessory protein UREG (predicted)               | 1.33 | 1.53 | 1.28 |
| SPAC4G9.11c   | <i>cmb1</i>   | cytosine-mismatch binding protein 1                     | cytosine-mismatch binding protein 1                     | 0.97 | 2.16 | 1.42 |
| SPCC1672.03c  |               | guanine deaminase (predicted)                           | guanine deaminase (predicted)                           | 1.05 | 3.28 | 0.95 |
| SPAC1399.02   |               | membrane transporter                                    | membrane transporter                                    | 1.03 | 1.89 | 1.14 |
| SPCC320.09    | <i>hem15</i>  | ferrochelataase                                         | ferrochelataase                                         | 0.96 | 1.98 | 1.25 |
| SPAC4G8.11c   | <i>atp10</i>  | F1-F0 ATPase assembly protein (predicted)               | F1-F0 ATPase assembly protein                           | 1.04 | 1.67 | 1.02 |
| SPAC22H12.03  |               | mitochondrial hydrolase (predicted)                     | mitochondrial hydrolase                                 | 1.00 | 2.51 | 1.11 |
| SPAC328.03    | <i>tps1</i>   | alpha,alpha-trehalose-phosphate synthase [UDP-forming]  | alpha,alpha-trehalose-phosphate synthase [UDP-forming]  | 0.99 | 1.72 | 1.31 |
| SPAC23H3.12c  |               | conserved protein (fungal and plant)                    | conserved protein (fungal and plant)                    | 0.87 | 2.12 | 1.23 |
| SPAC1039.10   | <i>mmf2</i>   | homologous Pmf1p factor 1                               |                                                         | 1.42 | 9.58 | 1.10 |
| SPBPB2B2.02   | <i>mug180</i> | esterase/lipase (predicted)                             |                                                         | 1.39 | 3.44 | 0.70 |
| SPBC4B4.10c   | <i>mug77</i>  | autophagy associated protein Atg5 (predicted)           |                                                         | 1.05 | 1.54 | 1.26 |
| SPBC12C2.04   |               | NAD binding dehydrogenase family protein                |                                                         | 0.70 | 1.51 | 1.48 |
| SPBC30D10.14  |               | dienelactone hydrolase family                           |                                                         | 0.91 | 1.76 | 1.36 |
| SPCC1442.05c  |               | conserved fungal protein                                | conserved fungal protein                                | 0.86 | 1.73 | 1.44 |
| SPAC521.03    |               | short chain dehydrogenase (predicted)                   | short chain dehydrogenase (predicted)                   | 0.88 | 2.33 | 1.07 |

|               |              |                                                                  |                                                                  |      |      |      |
|---------------|--------------|------------------------------------------------------------------|------------------------------------------------------------------|------|------|------|
| SPAC25B8.04c  |              | mitochondrial splicing suppressor (predicted)                    | mitochondrial splicing suppressor (predicted)                    | 0.97 | 1.51 | 1.23 |
| SPAC8F11.07c  | <i>cdc24</i> | DNA replication protein Cdc24                                    | DNA replication protein Cdc24                                    | 1.24 | 1.78 | 1.07 |
| SPAC513.06c   |              | dihydrodiol dehydrogenase (predicted)                            | dihydrodiol dehydrogenase (predicted)                            | 0.83 | 3.19 | 1.16 |
| SPAC1002.10c  | <i>sgt1</i>  | SGT1 family transcriptional regulator Sgt1                       | SGT1 family protein Sgt1                                         | 1.10 | 1.82 | 1.24 |
| SPAC140.01    | <i>sdh2</i>  | succinate dehydrogenase (ubiquinone) iron-sulfur protein subunit | succinate dehydrogenase (ubiquinone) iron-sulfur protein subunit | 1.05 | 1.57 | 1.39 |
| SPBC646.12c   | <i>gap1</i>  | GTPase activating protein Gap1                                   |                                                                  | 1.02 | 1.66 | 1.40 |
| SPAC2H10.02c  |              | 26S proteasome regulator (predicted)                             | 26S proteasome regulator (predicted)                             | 0.97 | 1.69 | 1.30 |
| SPAC688.08    | <i>srb8</i>  | mediator complex subunit Srb8                                    | mediator complex subunit Srb8 (PMID 12738880)                    | 1.13 | 1.50 | 1.40 |
| SPAC144.08    |              | DNAJ domain protein Jac1 (predicted)                             | DNAJ domain protein Jac1 (predicted)                             | 1.33 | 1.72 | 0.90 |
| SPBC11B10.08  |              | conserved fungal protein                                         |                                                                  | 1.06 | 1.69 | 1.25 |
| SPCC74.04     |              | amino acid permease, unknown 15                                  | amino acid permease, unknown 15                                  | 1.02 | 1.96 | 1.04 |
| SPAC589.04    |              | metaxin 1                                                        | metaxin 1                                                        | 0.87 | 1.51 | 1.39 |
| SPBP35G2.10   | <i>mit1</i>  | SHREC complex subunit Mit1                                       |                                                                  | 0.89 | 1.63 | 1.39 |
| SPAP27G11.05c | <i>vps41</i> | vacuolar protein sorting-associated protein Vps41                | vacuolar protein sorting-associated protein Vps41                | 0.79 | 1.80 | 1.19 |
| SPAC20G8.03   | <i>itr2</i>  | MFS myo-inositol transporter                                     | MFS myo-inositol transporter                                     | 1.42 | 1.76 | 1.50 |
| SPAC22H10.12c | <i>gdi1</i>  | GDP dissociation inhibitor Gdi1 (predicted)                      | GDP dissociation inhibitor Gdi1 (predicted)                      | 0.95 | 1.73 | 1.34 |
| SPBC947.06c   |              | spermidine family transporter (predicted)                        |                                                                  | 1.37 | 1.59 | 1.12 |
| SPAC13G6.15c  |              | calcipressin                                                     |                                                                  | 1.18 | 1.53 | 0.84 |
| SPAC1296.06   |              | NADPH cytochrome reductase (predicted)                           | NADPH cytochrome reductase                                       | 1.21 | 1.63 | 1.22 |
| SPAC328.08c   |              | tubulin specific chaperone cofactor C (predicted)                | tubulin specific chaperone cofactor C (predicted)                | 0.90 | 1.86 | 1.42 |
| SPCC191.06    |              | sequence orphan                                                  | sequence orphan                                                  | 0.77 | 2.85 | 1.12 |
| SPBC106.08c   | <i>mug2</i>  | DUF1773 family protein 1                                         | DUF1773 family protein 1                                         | 1.08 | 2.27 | 1.11 |
| SPAC144.16    |              | DUF59 family protein                                             | DUF59 family protein                                             | 1.04 | 1.84 | 1.31 |
| SPBC1348.01   |              | S. pombe specific DUF999 protein family 5                        | S. pombe specific DUF999 protein family 5                        | 1.14 | 1.50 | 1.20 |
| SPBC4B4.02c   | <i>nca2</i>  | mitochondrial protein Nca2 (predicted)                           | mitochondrial protein Nca2 (predicted)                           | 0.96 | 2.69 | 1.40 |
| SPAC6G10.08   | <i>idp1</i>  | isocitrate dehydrogenase Idp1                                    | isocitrate dehydrogenase Idp1                                    | 1.09 | 1.97 | 0.87 |
| SPCC70.03c    |              | proline dehydrogenase                                            | proline dehydrogenase                                            | 0.98 | 1.86 | 1.27 |

|               |               |                                                         |                                                                        |      |       |      |
|---------------|---------------|---------------------------------------------------------|------------------------------------------------------------------------|------|-------|------|
| SPCC1235.15   | <i>dga1</i>   | diacylglycerol O-acyltransferase                        |                                                                        | 0.79 | 1.56  | 1.37 |
| SPCC11E10.01  |               | cystathionine beta-lyase (predicted)                    | cystathionine beta-lyase (predicted)                                   | 1.06 | 3.17  | 0.98 |
| SPAC144.10c   | <i>gwt1</i>   | pig-W                                                   | pig-W                                                                  | 1.10 | 1.55  | 1.38 |
| SPCC965.09    |               | nitrilase (predicted)                                   | nitrilase (predicted)                                                  | 0.93 | 2.00  | 0.96 |
| SPAPYUG7.06   | <i>mug67</i>  | PPPDE peptidase family (predicted)                      | PPPDE peptidase family (predicted)                                     | 1.04 | 1.95  | 1.31 |
| SPAC4G9.10    | <i>arg3</i>   | ornithine carbamoyltransferase Arg3                     | ornithine carbamoyltransferase Arg3                                    | 0.97 | 1.59  | 0.61 |
| SPCC63.05     |               | TAP42 family protein (predicted)                        | TAP42 family protein (predicted)                                       | 1.05 | 1.71  | 1.17 |
| SPBC409.17c   |               | DUF1769 family protein                                  |                                                                        | 1.17 | 1.60  | 1.06 |
| SPBC1778.03c  |               | NADH pyrophosphatase (predicted)                        |                                                                        | 0.83 | 1.83  | 1.18 |
| SPCC16C4.03   | <i>pin1</i>   | peptidyl-prolyl cis-trans isomerase Pin1                | peptidyl-prolyl cis-trans isomerase Pin1                               | 0.86 | 1.66  | 1.31 |
| SPBC1289.11   | <i>spf38</i>  | splicing factor Spf38                                   | splicing factor Spf38                                                  | 0.92 | 1.70  | 1.20 |
| SPAC11D3.09   |               | agmatinase (predicted)                                  | agmatinase (predicted)                                                 | 0.77 | 16.87 | 0.87 |
| SPCC191.05c   |               | nucleoside 2-deoxyribosyltransferase (predicted)        | nucleoside 2-deoxyribosyltransferase (predicted)                       | 1.02 | 2.13  | 0.70 |
| SPAC26A3.11   |               | amidohydrolase                                          | amidohydrolase                                                         | 0.93 | 1.66  | 1.25 |
| SPAC12G12.16c |               | nuclease, XP-G family                                   | nuclease, XP-G family                                                  | 0.89 | 1.88  | 1.18 |
| SPBC646.13    | <i>sds23</i>  | inducer of sexual development Sds23/Moc1                |                                                                        | 1.06 | 1.86  | 1.44 |
| SPAC18B11.04  | <i>ncs1</i>   | related to neuronal calcium sensor Ncs1                 | related to neuronal calcium sensor Ncs1                                | 1.35 | 1.69  | 1.42 |
| SPAC11E3.09   | <i>pyp3</i>   | protein-tyrosine phosphatase Pyp3                       | protein-tyrosine phosphatase Pyp3                                      | 0.87 | 1.70  | 1.19 |
| SPAC26F1.11   |               | dubious                                                 | sequence orphan                                                        | 0.95 | 1.63  | 1.17 |
| SPCC338.04    | <i>cid2</i>   | caffeine induced death protein Cid2                     | caffeine induced death protein Cid2                                    | 1.17 | 2.11  | 1.36 |
| SPAC824.07    |               | hydroxyacylglutathione hydrolase (predicted)            | hydroxyacylglutathione hydrolase (predicted)                           | 0.96 | 2.47  | 1.20 |
| SPAC2C4.15c   | <i>ubx2</i>   | UBX domain protein Ubx2                                 | UBX domain protein Ubx2                                                | 1.12 | 1.78  | 1.04 |
| SPAC10F6.14c  |               | ABC1 kinase family protein                              | ABC1 kinase family protein                                             | 0.97 | 1.72  | 1.14 |
| SPBC651.09c   |               | RNA polymerase II associated Paf1 complex (predicted)   |                                                                        | 0.95 | 1.88  | 1.43 |
| SPBC800.07c   | <i>tsf1</i>   | mitochondrial translation elongation factor EF-Ts Tsf1  | mitochondrial translation elongation factor EF-Ts Tsf1 (PMID 15695360) | 1.00 | 1.83  | 1.34 |
| SPBC17G9.13c  |               | sequence orphan                                         |                                                                        | 0.96 | 1.50  | 1.15 |
| SPAC6F6.18c   | <i>mug169</i> | sequence orphan                                         | sequence orphan                                                        | 1.37 | 2.03  | 1.22 |
| SPBC27B12.14  |               | mitochondrial membrane protein complex assembly protein |                                                                        | 1.13 | 1.53  | 1.41 |
| SPCC1795.07   |               | mitochondrial ribosomal protein subunit S37 (predicted) | mitochondrial ribosomal protein subunit S37 (predicted)                | 1.13 | 1.56  | 1.06 |

|               |               |                                                           |                                                            |      |      |      |
|---------------|---------------|-----------------------------------------------------------|------------------------------------------------------------|------|------|------|
| SPBC13G1.05   |               | DUF747 family protein                                     |                                                            | 1.09 | 1.70 | 1.48 |
| SPAC25H1.02   | <i>jmj1</i>   | Jmj1 protein                                              | Jmj1 protein                                               | 1.02 | 1.59 | 0.91 |
| SPBC17A3.02   |               | conserved fungal protein                                  |                                                            | 0.91 | 1.65 | 1.39 |
| SPAC24C9.06c  |               | aconitate hydratase                                       | aconitate hydratase                                        | 1.12 | 1.53 | 1.24 |
| SPBC2G2.07c   | <i>mug178</i> | mitochondrial ribosomal protein subunit L51-b             |                                                            | 1.00 | 1.72 | 1.45 |
| SPCC1450.07c  |               | D-amino acid oxidase (predicted)                          | D-amino acid oxidase (predicted)                           | 0.90 | 2.43 | 0.95 |
| SPAC3H8.04    |               | chromosome segregation protein                            | chromosome segregation protein                             | 0.84 | 1.52 | 1.49 |
| SPAC22H12.01c | <i>mug35</i>  | sequence orphan                                           | sequence orphan                                            | 0.79 | 2.41 | 1.49 |
| SPAC57A10.11c | <i>tim40</i>  | TIM22 inner membrane protein import complex subunit Tim40 | TIM22 inner membrane protein import complex subunit Tim40  | 1.10 | 1.85 | 1.31 |
| SPBC1347.11   | <i>sro1</i>   | sequence orphan                                           | sequence orphan                                            | 1.09 | 3.30 | 0.96 |
| SPAC644.07    |               | mitochondrial Rieske ISP assembly ATPase (predicted)      | Rieske ISP assembly protein                                | 1.00 | 1.91 | 1.45 |
| SPBC119.09c   |               | ORMDL family protein                                      |                                                            | 1.10 | 1.51 | 1.37 |
| SPAC14C4.03   | <i>mek1</i>   | Cds1/Rad53/Chk2 family protein kinase Mek1                | Cds1/Rad53/Chk2 family protein kinase Mek1 (PMID 12482912) | 1.39 | 1.58 | 1.38 |
| SPCC1259.09c  |               | pyruvate dehydrogenase protein x component                | pyruvate dehydrogenase protein x component                 | 1.14 | 2.51 | 1.11 |
| SPAC11H11.02c | <i>mug162</i> | sequence orphan                                           | sequence orphan                                            | 1.02 | 1.62 | 1.30 |
| SPAC56F8.15   |               | dubious                                                   | dubious                                                    | 1.31 | 2.07 | 1.06 |
| SPAC10F6.06   | <i>vip1</i>   | RNA-binding protein Vip1                                  | RNA-binding protein Vip1                                   | 1.02 | 1.58 | 1.27 |
| SPBC2G2.01c   | <i>liz1</i>   | pantothenate transporter                                  |                                                            | 1.05 | 1.95 | 1.08 |
| SPBC20F10.02c |               | DUF1741 family protein                                    |                                                            | 0.82 | 1.54 | 1.19 |
| SPBC3H7.02    |               | sulfate transporter (predicted)                           |                                                            | 0.78 | 1.71 | 1.22 |
| SPACUNK4.17   |               | NAD binding dehydrogenase family protein                  | NAD binding dehydrogenase family protein                   | 0.74 | 5.18 | 1.39 |
| SPAC24C9.13c  | <i>mrp10</i>  | mitochondrial ribosomal protein subunit Mrp10             | mitochondrial ribosomal protein subunit Mrp10              | 0.96 | 1.67 | 1.38 |
| SPAC1B3.06c   |               | UbiE family methyltransferase (predicted)                 | UbiE family methyltransferase (predicted)                  | 1.14 | 3.00 | 1.21 |
| SPBC649.03    | <i>rhp14</i>  | XP-A family homolog Rhp14                                 | XP-A family homolog Rhp14                                  | 1.00 | 1.78 | 1.28 |
| SPAC1486.01   |               | manganese superoxide dismutase (AF069292)                 | manganese superoxide dismutase (AF069292)                  | 0.93 | 2.15 | 1.49 |
| SPAC22E12.15  |               |                                                           | dubious                                                    | 1.33 | 1.66 | 1.08 |
| SPAP27G11.12  |               | human down-regulated in multiple cancers-1 homolog 1      | human down-regulated in multiple cancers-1 homolog 1       | 0.87 | 1.69 | 1.19 |
| SPBC83.12     |               | sequence orphan                                           |                                                            | 0.88 | 3.69 | 1.47 |

|                |              |                                              |                                                       |      |      |      |
|----------------|--------------|----------------------------------------------|-------------------------------------------------------|------|------|------|
| SPBC1709.09    |              | mitochondrial translation termination factor |                                                       | 0.95 | 1.68 | 1.11 |
| SPAPB17E12.04c | <i>csn2</i>  | COP9/signalosome complex subunit Csn2        | COP9/signalosome complex subunit Csn2 (PMID 11854407) | 0.93 | 1.65 | 1.18 |
| SPAC2E1P3.04   |              | copper amine oxidase (predicted)             | copper amine oxidase (predicted)                      | 0.91 | 6.70 | 1.33 |
| SPBC1289.02c   | <i>uap2</i>  | U2 snRNP-associated protein Uap2             |                                                       | 1.18 | 1.54 | 1.23 |
| SPAC1142.07c   | <i>vps32</i> | vacuolar sorting protein Vps32               | vacuolar sorting protein Vps32                        | 0.94 | 1.55 | 1.50 |
| SPBC215.07c    |              | PWWP domain protein                          |                                                       | 0.82 | 1.52 | 1.46 |
| SPAC22F3.13    | <i>tsc1</i>  | hamartin                                     | hamartin                                              | 0.98 | 1.92 | 1.48 |
| SPBC3B9.17     | <i>isa2</i>  | iron-sulfur protein Isa2                     |                                                       | 0.91 | 1.80 | 1.32 |
| SPBC713.09     |              | sequence orphan                              |                                                       | 0.90 | 1.76 | 1.37 |

---
