# Supplementary material for: The Fission Yeast GATA Factor, Gaf1, Modulates Sexual Development via Direct Down-Regulation of ste11+ Expression in Response to Nitrogen Starvation
Source: PubMed Central journal article supplement (PMC3416868; doi:10.1371/journal.pone.0042409), 2012-08-10
Supplement: pone.0042409.s007.pdf [file pone.0042409.s007.pdf]

Table S7. List of the genes in Subgroup D

\* 983 genes

| Systematic    | Gene name     | Description (GeneDB)                      | Description (FunCat2)                     | Expression Ratio          |                        |                              |
|---------------|---------------|-------------------------------------------|-------------------------------------------|---------------------------|------------------------|------------------------------|
|               |               |                                           |                                           | (gaf1Δ, +N)<br>/ (WT, +N) | (WT, -N)<br>/ (WT, +N) | (gaf1Δ, -N)<br>/ (gaf1Δ, +N) |
| SPCC417.06c   | <i>ppk35</i>  | serine/threonine protein kinase Ppk35     | serine/threonine protein kinase Ppk35     | 1.19                      | 3.93                   | 4.00                         |
| SPAC589.07c   |               | WD repeat protein Atg18                   | WD repeat protein Atg18                   | 0.80                      | 5.30                   | 7.00                         |
| SPAC11H11.01  | <i>sst6</i>   | ESCRT I complex subunit Vps23             | ESCRT I complex subunit Vps23             | 0.94                      | 3.33                   | 2.77                         |
| SPAC3C7.02c   |               | protein kinase inhibitor (predicted)      | protein kinase inhibitor (predicted)      | 1.02                      | 12.84                  | 2.24                         |
| SPCC126.02c   | <i>pku70</i>  | Ku domain protein Pku70                   | Ku domain protein Pku70                   | 1.10                      | 1.65                   | 1.72                         |
| SPCC417.10    |               | membrane transporter                      | membrane transporter                      | 0.96                      | 1.90                   | 2.15                         |
| SPCC645.03c   | <i>isa1</i>   | iron-sulfur protein Isa1                  | iron-sulfur protein Isa1                  | 1.09                      | 3.16                   | 1.92                         |
| SPCC1529.01   |               | membrane transporter                      |                                           | 0.70                      | 2.27                   | 4.25                         |
| SPCC622.06c   |               | dubious                                   | dubious                                   | 1.24                      | 2.88                   | 1.52                         |
| SPAC32A11.03c | <i>phx1</i>   | homeobox transcription factor Phx1        | homeobox transcription factor Phx1        | 0.84                      | 2.89                   | 2.57                         |
| SPBP8B7.23    |               | ubiquitin-protein ligase E3 (predicted)   |                                           | 0.99                      | 1.89                   | 1.50                         |
| SPAC637.03    |               | conserved fungal protein                  | conserved fungal protein                  | 0.88                      | 6.01                   | 5.78                         |
| SPBC31E1.04   | <i>pep12</i>  | SNARE Pep12                               | SNARE Pep12                               | 0.93                      | 2.40                   | 2.56                         |
| SPBC19C7.10   |               | transcription factor (predicted)          |                                           | 0.90                      | 2.57                   | 3.06                         |
| SPAC26F1.04c  | <i>etr1</i>   | enoyl-[acyl-carrier protein] reductase    | enoyl-[acyl-carrier protein] reductase    | 0.89                      | 3.19                   | 2.17                         |
| SPBC337.07c   |               | carboxypeptidase (predicted)              |                                           | 0.89                      | 1.62                   | 1.56                         |
| SPBC20F10.03  |               | conserved eukaryotic protein              |                                           | 0.79                      | 3.02                   | 2.97                         |
| SPBC146.02    |               | sequence orphan                           |                                           | 1.03                      | 22.95                  | 19.49                        |
| SPAC3C7.05c   | <i>mug191</i> | alpha-1,6-mannanase (predicted)           | alpha-1,6- mannanase (predicted)          | 0.91                      | 10.52                  | 4.67                         |
| SPBC17D11.01  | <i>nep1</i>   | NEDD8 protease Nep1                       |                                           | 0.78                      | 1.91                   | 2.19                         |
| SPAC57A7.08   | <i>pzh1</i>   | serine/threonine protein phosphatase Pzh1 | serine/threonine protein phosphatase Pzh1 | 0.86                      | 2.02                   | 2.13                         |
| SPBC16D10.06  | <i>zrt1</i>   | ZIP zinc transporter Zrt1                 |                                           | 0.87                      | 1.94                   | 1.60                         |
| SPCC1739.08c  |               | short chain dehydrogenase (predicted)     | short chain dehydrogenase                 | 1.22                      | 56.61                  | 38.29                        |
| SPBC14F5.10c  |               | ubiquitin-protein ligase E3 (predicted)   |                                           | 1.13                      | 3.18                   | 2.36                         |
| SPAC11D3.10   |               | nifs homolog                              | nifs homolog                              | 1.41                      | 1.82                   | 1.64                         |
| SPBC17D1.07c  |               | GTPase regulator (predicted)              |                                           | 0.86                      | 1.64                   | 2.23                         |
| SPBC1683.02   |               | adenine deaminase (predicted)             | adenine deaminase (predicted)             | 0.76                      | 3.47                   | 1.67                         |
| SPAC31G5.21   |               | human family 32A homolog                  | human family 32A homolog                  | 0.92                      | 2.32                   | 1.80                         |

|               |               |                                                              |                                            |      |       |       |
|---------------|---------------|--------------------------------------------------------------|--------------------------------------------|------|-------|-------|
| SPAC15A10.03c | <i>rhp54</i>  | Rad54 homolog Rhp54                                          | Rad54 homolog Rhp54                        | 0.97 | 4.49  | 3.94  |
| SPCC1393.05   |               | sequence orphan                                              | sequence orphan                            | 0.83 | 1.86  | 2.40  |
| SPAC1F7.10    |               | hydantoin racemase family (predicted)                        | hydantoin racemase family (predicted)      | 1.29 | 4.53  | 2.37  |
| SPAC9G1.06c   | <i>cyk3</i>   | cytokinesis protein Cyk3                                     | cytokinesis protein Cyk3                   | 0.92 | 1.56  | 1.87  |
| SPBC19C2.11c  |               | mitochondrial outer membrane protein (predicted)             |                                            | 0.99 | 3.92  | 2.67  |
| SPBPB21E7.01c | <i>eno102</i> | enolase (predicted)                                          | enolase (predicted)                        | 0.43 | 26.65 | 2.07  |
| SPCC285.06c   | <i>wtf17</i>  | wtf element Wtf17, pseudo                                    | wtf element Wtf17, pseudo                  | 1.34 | 5.60  | 4.12  |
| SPBP4H10.10   |               | rhomboid family protease                                     |                                            | 1.28 | 41.09 | 31.83 |
| SPCC364.05    | <i>vps3</i>   | GTPase regulator Vps3 (predicted)                            | GTPase regulator Vps3 (predicted)          | 0.87 | 2.30  | 3.09  |
| SPBP19A11.02c |               | sequence orphan                                              |                                            | 0.63 | 1.92  | 3.08  |
| SPBC1347.01c  | <i>rev1</i>   | deoxycytidyl transferase Rev1 (predicted)                    | deoxycytidyl transferase Rev1 (predicted)  | 0.86 | 3.87  | 4.65  |
| SPCC1281.08   | <i>wtf11</i>  | wtf element Wtf11                                            | wtf element Wtf11                          | 1.19 | 2.36  | 3.85  |
| SPAC2G11.05c  |               | BRO1 domain protein                                          | BRO1 domain protein                        | 1.06 | 2.50  | 3.47  |
| SPAC6F12.08c  |               | exocyst complex subunit Exo84                                | exocyst complex subunit Exo84              | 0.90 | 2.20  | 2.11  |
| SPBC19G7.13   | <i>tbf1</i>   | telomeric repeat binding factor Trf1                         |                                            | 0.94 | 1.91  | 2.16  |
| SPBC365.08c   |               | Der1-like (degradation in the ER) family                     |                                            | 0.85 | 2.04  | 2.03  |
| SPAC732.02c   |               | fructose-2,6-bisphosphate 2-phosphatase activity (predicted) | 6-phosphofructo-2-kinase (predicted)       | 0.98 | 2.37  | 2.30  |
| SPAC9E9.15    |               | CIA30 family protein                                         | CIA30 family protein                       | 0.84 | 3.37  | 2.03  |
| SPAC24H6.11c  |               | sulfate transporter (predicted)                              | sulfate transporter (predicted)            | 0.80 | 2.41  | 1.76  |
| SPCC777.05    | <i>gtr2</i>   | Gtr1/RagA G protein Gtr2                                     | Gtr1/RagA G protein Gtr2                   | 0.88 | 1.58  | 1.96  |
| SPBC337.12    |               | human ZC3H3 homolog                                          |                                            | 0.89 | 1.67  | 2.16  |
| SPAC12B10.16c | <i>mug157</i> | conserved protein (fungal and bacterial)                     | conserved protein (fungal and bacterial)   | 1.12 | 1.95  | 1.84  |
| SPAC15A10.16  | <i>bud6</i>   | actin interacting protein 3 homolog Bud6                     |                                            | 0.83 | 1.73  | 2.32  |
| SPBC16E9.11c  | <i>pub3</i>   | ubiquitin-protein ligase E3                                  |                                            | 0.86 | 2.05  | 2.33  |
| SPCC1259.12c  |               | Ran GTPase binding protein (predicted)                       | Ran GTPase binding protein (predicted)     | 0.93 | 2.33  | 2.32  |
| SPAC31A2.12   |               | arrestin/PY protein 1                                        | arrestin/PY protein 1                      | 0.83 | 2.26  | 2.40  |
| SPAC227.04    |               | autophagy C terminal domain family protein                   | autophagy C terminal domain family protein | 1.00 | 2.71  | 2.15  |
| SPAC22H10.07  | <i>scd2</i>   | scaffold protein Scd2                                        | scaffold protein Scd2                      | 0.88 | 1.67  | 2.35  |
| SPCC162.06c   |               | vacuolar sorting protein Vps60                               | vacuolar sorting protein Vps60             | 0.99 | 3.58  | 3.84  |
| SPCC330.11    | <i>btb1</i>   | BTB/POZ domain protein Btb1                                  | BTB/POZ domain protein Btb1                | 0.90 | 1.90  | 2.04  |
| SPCC1223.13   | <i>cbf12</i>  | CBF1/Su(H)/LAG-1 family transcription factor Cbf12           | transcription factor (predicted)           | 0.65 | 2.39  | 1.75  |

|               |              |                                                             |                                                             |      |       |       |
|---------------|--------------|-------------------------------------------------------------|-------------------------------------------------------------|------|-------|-------|
| SPAC513.05    | <i>ams1</i>  | alpha-mannosidase (predicted)                               | alpha-mannosidase (predicted)                               | 0.93 | 4.40  | 3.21  |
| SPCC622.05    |              | dubious                                                     | dubious                                                     | 0.93 | 2.72  | 1.95  |
| SPAC11H11.04  | <i>mam2</i>  | pheromone p-factor receptor                                 | pheromone p-factor receptor (PMID 1657593)                  | 0.85 | 2.09  | 2.67  |
| SPAC22H10.06c |              | dubious                                                     | dubious                                                     | 0.43 | 1.54  | 2.06  |
| SPBC21H7.06c  |              | inositol metabolism protein Opi10 (predicted)               |                                                             | 0.72 | 2.31  | 1.80  |
| SPAC19B12.07c |              | human ZNF277P homolog                                       | human ZNF277P homolog                                       | 0.98 | 1.75  | 1.60  |
| SPAC57A7.09   |              | human RNF family homolog                                    | human RNF family homolog                                    | 0.88 | 4.07  | 4.10  |
| SPBC32F12.09  | <i>rum1</i>  | CDK inhibitor Rum1                                          |                                                             | 1.03 | 2.98  | 2.77  |
| SPBC685.05    | <i>gpi15</i> | pig-H (predicted)                                           |                                                             | 0.73 | 2.03  | 1.71  |
| SPAC17C9.12   |              | MSP domain                                                  | MSP domain                                                  | 0.94 | 2.04  | 1.78  |
| SPAC3G6.05    |              | Mvp17/PMP22 family protein 1                                | Mvp17/PMP22 family                                          | 0.79 | 1.88  | 1.55  |
| SPBC36B7.09   | <i>gcn2</i>  | eIF2 alpha kinase Gcn2 (predicted)                          | eIF2 alpha kinase Gcn2 (predicted)                          | 0.96 | 2.93  | 1.72  |
| SPAC23H4.14   | <i>vam6</i>  | guanyl-nucleotide exchange factor Vam6                      | guanyl-nucleotide exchange factor Vma6                      | 0.78 | 1.71  | 2.15  |
| SPBC1683.13c  |              | transcription factor (predicted)                            | transcription factor (predicted)                            | 0.93 | 2.49  | 1.98  |
| SPAC2G11.03c  | <i>vps45</i> | vacuolar sorting protein Vps 45 (predicted)                 | vacuolar sorting protein Vps 45                             | 0.83 | 1.74  | 1.99  |
| SPBC15C4.06c  |              | ubiquitin-protein ligase E3 (predicted)                     |                                                             | 1.11 | 4.64  | 4.12  |
| SPAC1F5.04c   | <i>cdc12</i> | formin Cdc12                                                | formin Cdc12                                                | 0.89 | 1.63  | 1.75  |
| SPAC630.04c   |              | sequence orphan                                             | sequence orphan                                             | 1.06 | 2.19  | 1.85  |
| SPAC1834.09   | <i>mug51</i> | conserved fungal protein                                    | conserved fungal protein                                    | 0.73 | 2.24  | 2.19  |
| SPAPB24D3.10c | <i>agl1</i>  | alpha-glucosidase Agl1                                      | alpha-glucosidase Agl1                                      | 0.72 | 31.15 | 43.09 |
| SPBP35G2.11c  |              | transcription related zf-ZZ type zinc finger protein        |                                                             | 1.00 | 2.34  | 2.13  |
| SPAC13G7.07   | <i>arb2</i>  | argonaute binding protein 2                                 | argonaute binding protein 2                                 | 1.12 | 2.20  | 2.13  |
| SPBC3H7.08c   |              | conserved fungal protein                                    |                                                             | 0.51 | 12.30 | 6.49  |
| SPAC4G9.04c   |              | cleavage and polyadenylation specificity factor (predicted) | cleavage and polyadenylation specificity factor (predicted) | 0.87 | 1.55  | 1.76  |
| SPBC4C3.12    | <i>41153</i> | fork head transcription factor Sep1                         |                                                             | 0.86 | 2.72  | 3.04  |
| SPAC11D3.16c  |              | sequence orphan                                             | sequence orphan                                             | 0.95 | 5.00  | 2.07  |
| SPBC21.06c    | <i>cdc7</i>  | serine/threonine protein kinase Cdc7                        |                                                             | 0.73 | 2.18  | 2.62  |
| SPCC594.06c   |              | SNARE Vam7 (predicted)                                      | SNARE Vam7 (predicted)                                      | 1.00 | 4.11  | 3.18  |
| SPAC1610.04   | <i>mug99</i> | meiotically upregulated gene Mug99                          | meiotically upregulated gene Mug99                          | 1.03 | 3.44  | 1.94  |
| SPCPJ732.02c  |              | xylulose kinase (predicted)                                 | xylulose kinase (predicted)                                 | 0.95 | 4.20  | 3.06  |
| SPBC16C6.06   | <i>pep1</i>  | sorting receptor for CPY                                    |                                                             | 1.09 | 2.55  | 2.42  |
| SPAPB1A10.10c | <i>ypt71</i> | GTPase Ypt71                                                | GTPase Ypt71                                                | 0.93 | 2.23  | 2.08  |

|               |               |                                                                               |                                                                                       |      |       |       |
|---------------|---------------|-------------------------------------------------------------------------------|---------------------------------------------------------------------------------------|------|-------|-------|
| SPAPB2B4.01c  | <i>gpi12</i>  | pig-L (predicted)                                                             | pig-L                                                                                 | 1.07 | 4.01  | 2.60  |
| SPBC36.11     |               | sequence orphan                                                               |                                                                                       | 0.88 | 3.34  | 3.82  |
| SPAC27F1.08   | <i>pdt1</i>   | Nramp family manganese ion transporter                                        | Nramp family manganese ion transporter                                                | 0.85 | 1.65  | 1.91  |
| SPBC1A4.04    |               | sequence orphan                                                               |                                                                                       | 0.91 | 1.88  | 1.55  |
| SPAC1952.17c  |               | GTPase activating protein                                                     |                                                                                       | 0.96 | 2.74  | 1.92  |
| SPAC26A3.14c  |               | DUF1748 family protein                                                        | DUF1748 family protein                                                                | 0.98 | 1.78  | 1.52  |
| SPBC56F2.06   | <i>mug147</i> | sequence orphan                                                               |                                                                                       | 1.37 | 43.26 | 19.90 |
| SPCC1020.05   |               | phosphoprotein phosphatase (predicted)                                        | phosphoprotein phosphatase (predicted)                                                | 0.99 | 5.12  | 6.74  |
| SPBC21.07c    | <i>ppk24</i>  | serine/threonine protein kinase Ppk24                                         |                                                                                       | 0.99 | 2.25  | 3.23  |
| SPCC622.02    |               | dubious                                                                       | dubious                                                                               | 0.84 | 2.50  | 2.69  |
| SPAC2F7.08c   | <i>snf5</i>   | chromatin remodeling complex subunit Snf5 (predicted)                         | chromatin remodeling complex subunit Snf5 (predicted)                                 | 1.11 | 1.79  | 1.63  |
| SPBC1718.07c  | <i>zfs1</i>   | CCCH tandem zinc finger protein, human Tristetraprolin homolog Zfs1           |                                                                                       | 0.96 | 1.74  | 2.06  |
| SPAC15A10.05c | <i>mug182</i> | YjeF family protein                                                           | YjeF family protein                                                                   | 0.89 | 19.31 | 10.16 |
| SPCC777.13    | <i>vps35</i>  | retromer complex subunit Vps35                                                | retromer complex subunit Vps35                                                        | 0.93 | 2.41  | 2.08  |
| SPAC17A2.01   | <i>bsu1</i>   | high-affinity import carrier for pyridoxine, pyridoxal, and pyridoxamine Bsu1 | high-affinity import carrier for pyridoxine,pyridoxal, and pyridoxamine Bsu1          | 0.98 | 8.40  | 12.05 |
| SPAC1687.12c  | <i>coq4</i>   | ubiquinone biosynthesis protein Coq4 (predicted)                              | ubiquinone biosynthesis protein Coq4                                                  | 1.06 | 2.04  | 1.71  |
| SPAC1635.01   |               | voltage-dependent anion-selective channel                                     | voltage-dependent anion-selective channel                                             | 1.03 | 2.01  | 1.82  |
| SPCPB16A4.06c |               | sequence orphan                                                               | sequence orphan                                                                       | 1.33 | 74.11 | 13.20 |
| SPCC757.13    |               | membrane transporter (predicted)                                              | membrane transporter (predicted)                                                      | 0.84 | 7.57  | 1.54  |
| SPAC2E1P3.01  |               | zinc binding dehydrogenase                                                    | zinc binding dehydrogenase                                                            | 1.13 | 3.38  | 2.30  |
| SPBC14C8.08c  |               | dubious                                                                       |                                                                                       | 0.86 | 1.77  | 2.12  |
| SPAC3A11.10c  |               | dipeptidyl aminopeptidase (predicted)                                         | dipeptidyl aminopeptidase (predicted)                                                 | 1.26 | 6.91  | 3.17  |
| SPAC144.17c   |               | 6-phosphofructo-2-kinase                                                      | 6-phosphofructo-2-kinase                                                              | 0.90 | 1.72  | 1.65  |
| SPAC13F5.03c  |               | mitochondrial iron-containing alcohol dehydrogenase family protein            | glycerol dehydrogenase (Phlippen, Stevens, Wolf,Zimmermann manuscript in preparation) | 0.81 | 21.62 | 22.05 |
| SPAC1A6.06c   | <i>meu31</i>  | sequence orphan                                                               | sequence orphan                                                                       | 0.95 | 15.76 | 14.15 |
| SPAC823.03    | <i>ppk15</i>  | serine/threonine protein kinase Ppk15 (predicted)                             | serine/threonine protein kinase Ppk15 (predicted)                                     | 0.95 | 2.68  | 2.23  |
| SPBC29A3.03c  |               | ubiquitin-protein ligase E3 (predicted)                                       |                                                                                       | 0.99 | 3.49  | 2.65  |

|               |               |                                                                                                        |                                                   |      |       |       |
|---------------|---------------|--------------------------------------------------------------------------------------------------------|---------------------------------------------------|------|-------|-------|
| SPBC21C3.11   | <i>ubx4</i>   | UBX domain protein Ubx4 (predicted)                                                                    |                                                   | 0.87 | 2.48  | 1.96  |
| SPBC776.15c   |               | dihydrolipoamide S-succinyltransferase, e2 component of oxoglutarate dehydrogenase complex (predicted) |                                                   | 0.90 | 2.15  | 1.72  |
| SPBC365.15    | <i>alp4</i>   | gamma tubulin complex Spc97/GCP2 subunit Alp4                                                          |                                                   | 1.02 | 1.54  | 1.58  |
| SPAC16E8.03   | <i>gna1</i>   | glucosamine-phosphate N-acetyltransferase                                                              | glucosamine-phosphate N-acetyltransferase         | 0.90 | 7.34  | 4.59  |
| SPBC23E6.03c  | <i>nta1</i>   | protein N-terminal amidase Nta1 (predicted)                                                            |                                                   | 0.87 | 2.81  | 2.06  |
| SPAC57A10.08c |               | esterase/lipase (predicted)                                                                            | esterase/lipase (predicted)                       | 0.90 | 2.18  | 2.68  |
| SPAC1D4.11c   | <i>lkh1</i>   | dual specificity protein kinase Lkh1                                                                   | dual specificity protein kinase Lkh1              | 0.76 | 1.56  | 3.09  |
| SPBC691.05c   |               | membrane transporter (predicted)                                                                       |                                                   | 0.88 | 2.25  | 2.46  |
| SPAC23H3.15c  |               | sequence orphan                                                                                        |                                                   | 0.55 | 27.92 | 21.53 |
| SPBC14F5.11c  | <i>mug186</i> | sorting nexin Snx41                                                                                    |                                                   | 0.97 | 2.65  | 2.55  |
| SPAC6F6.08c   | <i>cdc16</i>  | two-component GAP Cdc16                                                                                | two-component GAP Cdc16                           | 0.81 | 1.77  | 2.26  |
| SPAC1399.04c  |               | uracil phosphoribosyltransferase (predicted)                                                           | uracil phosphoribosyltransferase (predicted)      | 0.75 | 1.56  | 1.50  |
| SPBC16G5.16   |               | transcription factor, zf-fungal binuclear cluster type (predicted)                                     |                                                   | 0.84 | 1.77  | 1.69  |
| SPAC22H10.13  | <i>zym1</i>   | metallothionein                                                                                        | metallothionein (PMID 12050156)                   | 0.82 | 12.32 | 6.96  |
| SPBC1652.01   |               | conserved fungal protein                                                                               |                                                   | 1.10 | 2.71  | 2.67  |
| SPBC1709.16c  |               | aromatic ring-opening dioxygenase (predicted)                                                          |                                                   | 0.62 | 2.56  | 2.61  |
| SPBC17F3.02   | <i>nak1</i>   | PAK-related kinase Nak1                                                                                |                                                   | 0.90 | 1.57  | 2.07  |
| SPAC25H1.09   | <i>mde5</i>   | alpha-amylase homolog Mde5                                                                             | alpha-amylase homolog Mde5                        | 0.53 | 1.56  | 2.66  |
| SPAC2E12.02   | <i>hsf1</i>   | transcription factor Hsf1                                                                              | transcription factor Hsf1                         | 0.82 | 1.94  | 1.90  |
| SPCC550.09    |               | peroxin Pex32 (predicted)                                                                              | peroxin Pex32 (predicted)                         | 0.93 | 2.25  | 2.06  |
| SPBC215.11c   |               | aldo/keto reductase, unknown biological role                                                           |                                                   | 0.74 | 9.24  | 5.99  |
| SPBC15D4.07c  | <i>atg9</i>   | autophagy associated protein Atg9 (predicted)                                                          |                                                   | 0.91 | 2.86  | 2.65  |
| SPAC607.07c   |               | sequence orphan                                                                                        | sequence orphan                                   | 0.81 | 1.74  | 1.78  |
| SPCC1393.02c  |               | non-specific DNA binding protein Spt2 (predicted)                                                      | non-specific DNA binding protein Spt2 (predicted) | 0.87 | 1.70  | 1.78  |
| SPCC965.05c   | <i>thp1</i>   | uracil DNA N-glycosylase Thp1                                                                          | uracil DNA N-glycosylase Thp1 (PMID 12711670)     | 0.98 | 1.97  | 2.27  |
| SPAC140.04    |               | conserved fungal protein                                                                               | conserved fungal protein                          | 0.90 | 2.48  | 2.31  |
| SPAC27E2.06c  |               | methionine-tRNA ligase, mitochondrial                                                                  | methionine-tRNA ligase                            | 1.12 | 2.55  | 1.65  |

|               |               |                                                          |                                                                  |      |       |       |
|---------------|---------------|----------------------------------------------------------|------------------------------------------------------------------|------|-------|-------|
| SPAC26F1.14c  | <i>aif1</i>   | apoptosis-inducing factor homolog Aif1                   | apoptosis-inducing factor homolog Aif1                           | 1.05 | 10.29 | 3.26  |
| SPBC20F10.10  |               | cyclin pho85 family                                      |                                                                  | 0.75 | 1.64  | 1.76  |
| SPAC1006.09   | <i>win1</i>   | MAP kinase kinase kinase Win1                            |                                                                  | 0.80 | 2.00  | 2.92  |
| SPCC126.04c   |               | SAGA complex subunit Sgf73 (predicted)                   | SAGA complex subunit Sgf73 (predicted)                           | 0.92 | 2.59  | 2.22  |
| SPAC29B12.11c |               | human WW domain binding protein-2 ortholog               | human WW domain binding protein-2 ortholog                       | 1.14 | 3.79  | 2.86  |
| SPBC800.14c   |               | DUF1772 family protein                                   | DUF1772 family protein                                           | 0.93 | 3.70  | 3.82  |
| SPAC16E8.02   |               | DUF962 family protein                                    | conserved protein (broad species distribution)                   | 0.98 | 6.27  | 3.92  |
| SPCC622.11    |               | LMBR1-like membrane protein                              | LMBR1-like membrane protein                                      | 0.83 | 4.06  | 3.93  |
| SPAC29B12.14c |               | purine transporter (predicted)                           | purine transporter (predicted)                                   | 1.10 | 4.26  | 1.94  |
| SPAP7G5.03    |               | conjugation protein (predicted)                          | conjugation protein (predicted)                                  | 0.95 | 4.00  | 6.03  |
| SPBC1198.06c  |               | mannan endo-1,6-alpha-mannosidase (predicted)            | mannan endo-1,6-alpha-mannosidase (predicted)                    | 0.89 | 2.68  | 2.56  |
| SPAC8F11.05c  | <i>mug130</i> | sequence orphan                                          | sequence orphan                                                  | 1.26 | 2.31  | 2.08  |
| SPBC1773.08c  |               | mannosyltransferase complex subunit (predicted)          | mannosyltransferase complex subunit (predicted)                  | 0.93 | 1.69  | 2.21  |
| SPAC25G10.07c | <i>cut7</i>   | kinesin-like protein Cut7                                | kinesin-like protein Cut7                                        | 1.01 | 1.74  | 1.69  |
| SPBC32F12.01c |               | inositol phosphosphingolipid phospholipase C (predicted) |                                                                  | 1.01 | 1.82  | 2.61  |
| SPAC1805.15c  | <i>pub2</i>   | ubiquitin-protein ligase Pub2                            | ubiquitin-protein ligase Pub2                                    | 0.64 | 2.94  | 4.73  |
| SPAC3H1.14    |               | cytoplasmic vesicle protein, Vid24 family                | cytoplasmic vesicle protein, Vid24 family                        | 0.89 | 2.16  | 1.99  |
| SPBP4H10.09   | <i>rsv1</i>   | transcription factor Rsv1 (predicted)                    |                                                                  | 0.63 | 15.71 | 33.11 |
| SPAC1B1.02c   |               | NAD/NADH kinase (predicted)                              | NAD/NADH kinase (predicted)                                      | 1.11 | 2.21  | 2.01  |
| SPBC3E7.01    | <i>fab1</i>   | 1-phosphatidylinositol-3-phosphate 5-kinase Fab1         | 1-phosphatidylinositol-3-phosphate 5-kinase Fab1 (PMID 10567352) | 1.00 | 1.72  | 1.92  |
| SPCC737.05    |               | peroxin Pex28/29                                         | peroxin Pex28/29                                                 | 0.71 | 1.90  | 2.06  |
| SPAC31G5.12c  | <i>maf1</i>   | repressor of RNA polymerase III Maf1 (predicted)         | repressor of RNA polymerase III Maf1 (predicted)                 | 0.85 | 1.73  | 2.57  |
| SPAC23C11.08  | <i>php3</i>   | CCAAT-binding factor complex subunit Php3                | CCAAT-binding factor complex subunit Php3 (PMID 8223474)         | 0.92 | 1.50  | 1.82  |
| SPAPB1A10.14  |               | F-box protein                                            | F-box protein, unnamed                                           | 1.29 | 3.82  | 4.17  |
| SPCC1393.12   |               | sequence orphan                                          | sequence orphan                                                  | 0.79 | 8.92  | 8.24  |
| SPCC4G3.12c   |               | ubiquitin-protein ligase E3 (predicted)                  | ubiquitin-protein ligase E3 (predicted)                          | 0.94 | 3.21  | 2.93  |
| SPCC622.04    |               | dubious                                                  | dubious                                                          | 0.71 | 1.79  | 3.23  |
| SPAC4G9.19    |               | DNAJ domain protein DNAJB family                         | DNAJ domain protein DNAJB family                                 | 0.88 | 3.23  | 2.88  |

|               |               |                                                                              |                                                                              |      |       |       |
|---------------|---------------|------------------------------------------------------------------------------|------------------------------------------------------------------------------|------|-------|-------|
| SPCC1620.09c  | <i>tfg1</i>   | transcription factor TFIIIF complex alpha subunit Tfg1 (predicted)           | transcription factor TFIIIF complex alpha subunit Tfg1                       | 0.97 | 1.90  | 1.73  |
| SPBC24C6.09c  |               | phosphoketolase (predicted)                                                  |                                                                              | 0.87 | 46.46 | 5.69  |
| SPBP8B7.13    |               | conserved fungal protein                                                     |                                                                              | 0.98 | 2.92  | 2.06  |
| SPBC1703.12   | <i>ubp9</i>   | ubiquitin C-terminal hydrolase Ubp9                                          | ubiquitin C-terminal hydrolase Ubp9                                          | 0.88 | 2.38  | 3.26  |
| SPBC660.09    | <i>mug168</i> | sequence orphan                                                              | sequence orphan                                                              | 0.95 | 5.42  | 2.57  |
| SPCC736.13    |               | short chain dehydrogenase (predicted)                                        | short chain dehydrogenase                                                    | 1.24 | 4.36  | 2.86  |
| SPAC13G6.03   | <i>gpi7</i>   | GPI anchor biosynthesis protein Gpi7 (predicted)                             | GPI anchor biosynthesis protein Gpi7 (predicted)                             | 0.77 | 1.97  | 1.67  |
| SPAC3H1.08c   |               | DUF1640 family protein                                                       | DUF1640 family protein                                                       | 0.95 | 1.73  | 1.52  |
| SPCC1906.04   | <i>wtf20</i>  | wtf element Wtf20                                                            | wtf element Wtf20                                                            | 0.92 | 3.28  | 3.51  |
| SPBC17D11.08  |               | WD repeat protein, human WDR68 family                                        |                                                                              | 0.99 | 3.27  | 2.87  |
| SPCC74.03c    | <i>ssp2</i>   | serine/threonine protein kinase Ssp2                                         | serine/threonine protein kinase Ssp2                                         | 0.98 | 1.54  | 1.64  |
| SPCC1183.11   |               | MS ion channel protein 1                                                     |                                                                              | 0.74 | 1.91  | 2.38  |
| SPAC26F1.07   |               | 2-methylbutyraldehyde reductase (predicted)                                  | 2-methylbutyraldehyde reductase (predicted)                                  | 0.83 | 1.53  | 1.58  |
| SPBC428.12c   |               | RNA-binding protein                                                          | RNA-binding protein                                                          | 0.98 | 1.81  | 1.61  |
| SPBC3E7.04c   |               | pseudo                                                                       |                                                                              | 0.99 | 2.72  | 2.65  |
| SPAC17C9.05c  | <i>pmc3</i>   | mediator complex subunit Pmc3 (pers. comm. Tomas Linder, from PMID 10625684) | mediator complex subunit Pmc3 (pers. comm. Tomas Linder, from PMID 10625684) | 0.86 | 2.27  | 2.46  |
| SPBC21C3.01c  | <i>vps13a</i> | chorein homolog                                                              | chorein homolog                                                              | 1.08 | 1.70  | 1.72  |
| SPBC23E6.01c  |               | RNA-binding protein, rrm type                                                |                                                                              | 0.94 | 2.51  | 2.54  |
| SPAC18G6.12c  |               | hypothetical protein                                                         | hypothetical protein                                                         | 0.75 | 2.94  | 2.90  |
| SPAC9.10      | <i>thi9</i>   | thiamine transporter Thi9                                                    | amino acid permease, unknown 2                                               | 0.98 | 1.96  | 1.99  |
| SPAC6F12.15c  | <i>cut9</i>   | anaphase-promoting complex subunit Cut9                                      | anaphase-promoting complex subunit Cut9                                      | 0.93 | 2.28  | 1.87  |
| SPAC521.04c   |               | calcium permease (predicted)                                                 | calcium permease (predicted)                                                 | 0.86 | 2.63  | 2.57  |
| SPCC5E4.10c   |               | sequence orphan                                                              | sequence orphan                                                              | 1.25 | 1.99  | 1.63  |
| SPAC5D6.07c   | <i>pxa1</i>   | PXA domain protein Pxa1                                                      | PXA domain protein                                                           | 0.86 | 3.11  | 2.89  |
| SPBC18H10.10c | <i>cwc16</i>  | complexed with Cdc5 protein Cwf16                                            |                                                                              | 0.97 | 1.96  | 1.83  |
| SPAC22G7.11c  |               | conserved fungal protein                                                     | conserved fungal protein                                                     | 0.60 | 52.42 | 10.52 |
| SPAC23A1.16c  |               | DUF408 family protein                                                        | DUF408 family protein                                                        | 1.16 | 1.70  | 1.89  |
| SPBC11B10.05c | <i>rsp1</i>   | random septum position protein Rsp1                                          |                                                                              | 0.92 | 1.71  | 2.05  |
| SPAC3A11.06   | <i>mvp1</i>   | sorting nexin Mvp1                                                           | sorting nexin Mvp1                                                           | 0.91 | 3.79  | 4.05  |
| SPCC1450.09c  |               | phospholipase (predicted)                                                    | phospholipase (predicted)                                                    | 0.96 | 2.52  | 1.59  |
| SPAC2C4.09    |               | DUF1640 family protein                                                       | DUF1640 family protein                                                       | 0.92 | 1.88  | 1.95  |

|               |              |                                                                |                                                        |      |       |       |
|---------------|--------------|----------------------------------------------------------------|--------------------------------------------------------|------|-------|-------|
| SPAC3G6.07    |              | dubious                                                        | sequence orphan                                        | 0.61 | 21.84 | 5.31  |
| SPAC22E12.03c |              | THIJ/PFPI family peptidase (predicted)                         | THIJ/PFPI family peptidase (predicted)                 | 0.87 | 1.86  | 1.57  |
| SPAC5D6.08c   | <i>mes1</i>  | meiosis II protein Mes1                                        | meiosis II protein Mes1                                | 1.00 | 1.51  | 2.11  |
| SPAC186.03    |              | L-asparaginase (predicted)                                     | L-asparaginase                                         | 1.10 | 2.62  | 2.71  |
| SPAC23D3.14c  | <i>aah2</i>  | alpha-amylase homolog Aah2                                     | alpha-amylase homolog Aah2                             | 1.24 | 1.85  | 1.76  |
| SPBC8E4.04    |              | aldo/keto reductase involved in pentose catabolism (predicted) |                                                        | 0.83 | 3.39  | 2.75  |
| SPAC1556.01c  | <i>rad50</i> | DNA repair protein Rad50                                       | DNA repair protein Rad50                               | 1.08 | 4.50  | 3.04  |
| SPBC14C8.09c  |              | conserved fungal protein                                       |                                                        | 0.79 | 1.94  | 2.00  |
| SPAC2E12.03c  |              | G-protein coupled receptor (predicted)                         | G-protein coupled receptor (predicted)                 | 0.81 | 10.00 | 3.79  |
| SPAC29E6.01   | <i>pof11</i> | F-box protein Pof11                                            | F-box protein Pof11                                    | 1.04 | 2.22  | 2.26  |
| SPAC29B12.03  | <i>spd1</i>  | ribonucleotide reductase (RNR) inhibitor                       | ribonucleotide reductase (RNR) inhibitor               | 0.85 | 2.78  | 2.97  |
| SPAC13C5.04   |              | amidotransferase (predicted)                                   | glutamine amidotransferase (predicted)                 | 0.91 | 6.78  | 3.07  |
| SPAC5H10.11   | <i>gmh1</i>  | alpha-1,2-galactosyltransferase Gmh1 (predicted)               | alpha-1,2-galactosyltransferase Gmh1                   | 1.02 | 15.73 | 5.64  |
| SPCC622.01c   |              | sequence orphan                                                | sequence orphan                                        | 0.91 | 1.59  | 2.15  |
| SPAC22H10.10  | <i>alp21</i> | tubulin specific chaperone cofactor E                          | tubulin specific chaperone cofactor E                  | 1.05 | 2.38  | 2.38  |
| SPBC776.05    |              | membrane transporter (predicted)                               |                                                        | 0.95 | 6.01  | 3.72  |
| SPCC1739.01   |              | zf-CCCH type zinc finger protein                               | zf-CCCH type zinc finger protein                       | 1.10 | 2.82  | 2.49  |
| SPAC821.04c   | <i>cid13</i> | poly(A) polymerase Cid13                                       | poly(A) polymerase Cid13 (PMID 12062100)               | 1.22 | 3.45  | 3.25  |
| SPCC24B10.07  | <i>gad8</i>  | serine/threonine protein kinase Gad8                           | serine/threonine protein kinase Gad8 (PMID 12805221)   | 0.89 | 2.00  | 2.44  |
| SPCC777.17c   |              | mitochondrial ribosomal protein subunit L9 (predicted)         | mitochondrial ribosomal protein subunit L9 (predicted) | 1.05 | 1.82  | 2.03  |
| SPAC16.05c    | <i>sfp1</i>  | transcription factor Sfp1 (predicted)                          | transcription factor Sfp1 (predicted)                  | 0.89 | 2.51  | 2.31  |
| SPCC191.01    |              | sequence orphan                                                | sequence orphan                                        | 0.90 | 6.17  | 7.39  |
| SPAC4G9.13c   | <i>vps26</i> | retromer complex subunit Vps26                                 | retromer complex subunit Vps26                         | 1.07 | 2.41  | 2.17  |
| SPCC18B5.03   | <i>wee1</i>  | dual specificity protein kinase Wee1                           | dual specificity protein kinase Wee1                   | 0.94 | 2.63  | 3.24  |
| SPAC23C4.16c  | <i>atg15</i> | triacylglycerol lipase Atg15 (predicted)                       | triacylglycerol lipase Atg15 (predicted)               | 0.93 | 1.81  | 2.15  |
| SPAC15E1.02c  |              | DUF1761 family protein                                         | DUF1761 family protein                                 | 0.61 | 19.11 | 8.63  |
| SPCC70.05c    |              | serine/threonine protein kinase (predicted)                    | serine/threonine protein kinase (predicted)            | 0.96 | 1.81  | 1.84  |
| SPAC3G9.11c   |              | pyruvate decarboxylase (predicted)                             | pyruvate decarboxylase (predicted)                     | 0.87 | 56.51 | 51.07 |
| SPAP32A8.02   |              | xylose and arabinose reductase (predicted)                     | xylose and arabinose reductase (predicted)             | 0.99 | 2.31  | 2.30  |



|               |              |                                                   |                                                                   |      |      |      |
|---------------|--------------|---------------------------------------------------|-------------------------------------------------------------------|------|------|------|
| SPBC18E5.10   |              | iron sulfur cluster assembly protein (predicted)  |                                                                   | 0.95 | 1.87 | 1.61 |
| SPAC644.06c   | <i>cdr1</i>  | GIN4 family protein kinase Cdr1                   | GIN4 family protein kinase Cdr1                                   | 0.83 | 2.09 | 2.12 |
| SPCC18.17c    |              | sequence orphan                                   | sequence orphan                                                   | 0.82 | 1.63 | 1.61 |
| SPAC343.04c   | <i>gnr1</i>  | heterotrimeric G protein beta subunit Gnr1        | heterotrimeric G protein beta subunit Gnr1                        | 0.99 | 1.91 | 1.76 |
| SPAC13G7.05   |              | acyl-coA-sterol acyltransferase (predicted)       | acyl-coA-sterol acyltransferase (predicted)                       | 0.88 | 2.67 | 2.02 |
| SPAC30D11.01c |              | alpha-glucosidase                                 |                                                                   | 1.07 | 5.00 | 5.48 |
| SPAP8A3.12c   |              | tripeptidylpeptidase (predicted)                  | tripeptidylpeptidase (predicted)                                  | 1.30 | 2.45 | 1.78 |
| SPBC15D4.13c  |              | sequence orphan                                   |                                                                   | 0.95 | 2.97 | 1.87 |
| SPCC1450.06c  | <i>grx3</i>  | monothiol glutaredoxin Grx3                       | monothiol glutaredoxin Grx3                                       | 0.90 | 1.94 | 2.17 |
| SPAPB2B4.06   |              | conserved fungal protein                          | conserved fungal protein                                          | 1.02 | 4.56 | 3.58 |
| SPAC11D3.08c  |              | amino acid permease, unknown 1                    | amino acid permease, unknown 1                                    | 1.21 | 2.77 | 2.42 |
| SPCC1494.09c  |              | sequence orphan                                   | sequence orphan                                                   | 0.99 | 2.00 | 1.73 |
| SPBC9B6.03    |              | zf-FYVE type zinc finger protein                  |                                                                   | 1.11 | 1.60 | 3.05 |
| SPCC1494.01   |              | iron/ascorbate oxidoreductase family              |                                                                   | 0.82 | 6.07 | 2.21 |
| SPCC970.01    | <i>rad16</i> | DNA repair endonuclease XPF                       | DNA repair endonuclease XPF                                       | 0.88 | 1.90 | 1.90 |
| SPCC794.02    | <i>wtf5</i>  | wtf element Wtf5                                  | wtf element Wtf5                                                  | 1.06 | 2.87 | 4.42 |
| SPCC417.05c   | <i>chr2</i>  | chitin synthase regulatory factor (putative) Chr2 | chitin synthase regulatory factor (putative) Chr2 (PMID 15449309) | 0.89 | 4.10 | 2.73 |
| SPCC663.02    | <i>wtf14</i> | wtf element Wtf14                                 | wtf element Wtf14                                                 | 1.03 | 3.38 | 2.34 |
| SPAC57A7.05   |              | conserved protein (fungal and plant)              | conserved protein (fungal and plant)                              | 0.70 | 7.31 | 4.42 |
| SPBC1A4.06c   |              | mitochondrial matrix protein import protein       |                                                                   | 1.06 | 2.40 | 1.85 |
| SPBC12C2.08   | <i>dnm1</i>  | dynamain Dnm1                                     | dynamain Dnm1                                                     | 0.94 | 2.18 | 1.64 |
| SPCC1450.08c  | <i>wtf16</i> | wtf element Wtf16                                 | wtf element Wtf16                                                 | 0.92 | 2.84 | 4.43 |
| SPAC23A1.17   |              | WIP homolog                                       | WIP homolog                                                       | 0.98 | 1.55 | 1.87 |
| SPBP23A10.09  |              | GIN5 complex subunit Psf1 (predicted)             |                                                                   | 0.84 | 2.24 | 2.24 |
| SPBC25B2.08   |              | sequence orphan                                   |                                                                   | 0.69 | 4.08 | 3.36 |
| SPAC1F5.08c   | <i>yam8</i>  | calcium transport protein                         | calcium transport protein                                         | 1.07 | 1.55 | 2.65 |
| SPCC1919.06c  | <i>wtf25</i> | wtf element                                       | wtf element                                                       | 1.12 | 3.26 | 2.18 |
| SPAC17C9.16c  |              | MFS family transmembrane transporter Mfs1         | MFS family transmembrane transporter Mfs1                         | 1.38 | 2.94 | 1.70 |
| SPAC1D4.13    | <i>byr1</i>  | MAP kinase kinase Byr1                            | MAP kinase kinase Byr1                                            | 1.22 | 2.30 | 1.79 |
| SPBC725.05c   |              | nucleotide pyrophosphatase (predicted)            |                                                                   | 0.92 | 2.16 | 2.36 |
| SPAC1952.11c  | <i>ure2</i>  | urease                                            | urease (PMID 9301025)                                             | 0.88 | 1.66 | 1.51 |
| SPAC4G8.10    | <i>gos1</i>  | SNARE Gos1 (predicted)                            | SNARE Gos1                                                        | 1.21 | 3.66 | 1.97 |

|               |              |                                                     |                                                     |      |       |       |
|---------------|--------------|-----------------------------------------------------|-----------------------------------------------------|------|-------|-------|
| SPBC1271.05c  |              | zinc finger protein zf-AN1 type                     | zinc finger protein zf-AN1 type                     | 1.49 | 11.92 | 6.24  |
| SPBC1706.03   | <i>fzo1</i>  | mitochondrial fusion GTPase protein                 |                                                     | 0.97 | 2.13  | 1.67  |
| SPAC5D6.04    |              | auxin family transmembrane transporter (predicted)  | auxin family                                        | 1.13 | 2.66  | 1.87  |
| SPAC19A8.12   | <i>dcp2</i>  | mRNA decapping complex subunit Dcp2                 | mRNA decapping complex subunit Dcp2                 | 0.92 | 1.55  | 1.59  |
| SPBC29A10.09c |              | CAF1 family ribonuclease                            |                                                     | 1.02 | 3.33  | 2.93  |
| SPAPB1A10.12c | <i>alo1</i>  | D-arabinono-1,4-lactone oxidase                     | D-arabinono-1,4-lactone oxidase                     | 1.07 | 1.65  | 1.54  |
| SPBC365.12c   | <i>ish1</i>  | LEA domain protein                                  |                                                     | 0.87 | 6.93  | 5.30  |
| SPAC2F3.05c   |              | xylose and arabinose reductase (predicted)          | xylose and arabinose reductase (predicted)          | 0.62 | 5.39  | 3.13  |
| SPAC1B9.02c   | <i>sck1</i>  | serine/threonine protein kinase Sck1                | serine/threonine protein kinase Sck1                | 0.99 | 1.69  | 1.67  |
| SPAC513.03    | <i>mfm2</i>  | M-factor precursor Mfm2                             | M-factor precursor Mfm2                             | 0.82 | 3.72  | 16.93 |
| SPBC1921.07c  |              | SAGA complex subunit Sgf29 (predicted)              |                                                     | 0.97 | 1.67  | 1.53  |
| SPBC337.15c   | <i>coq7</i>  | ubiquinone biosynthesis protein Coq7                |                                                     | 1.01 | 2.72  | 2.27  |
| SPBC13E7.11   |              | mitochondrial rhomboid protease                     |                                                     | 0.79 | 2.33  | 2.22  |
| SPAC3C7.03c   | <i>rhp55</i> | RecA family ATPase Rhp55                            | RecA family ATPase Rhp55                            | 0.90 | 2.59  | 2.26  |
| SPBC30B4.02c  |              | R3H and G-patch domain, implicated in splicing      |                                                     | 1.10 | 2.75  | 2.75  |
| SPAC6G9.16c   |              | sequence orphan                                     | sequence orphan                                     | 0.86 | 5.30  | 3.34  |
| SPBC16A3.02c  |              | mitochondrial peptidase (predicted)                 |                                                     | 0.86 | 3.83  | 3.66  |
| SPAC1F3.03    |              | Lgl family protein                                  | Lgl family protein                                  | 1.06 | 2.83  | 2.33  |
| SPBC29B5.02c  | <i>isp4</i>  | OPT oligopeptide transporter family                 |                                                     | 0.65 | 9.49  | 2.05  |
| SPBC887.19    | <i>rft1</i>  | Man5GlcNac2-PP-Dol translocation protein Rft1       |                                                     | 1.00 | 2.46  | 2.77  |
| SPCC736.11    | <i>ago1</i>  | argonaute                                           | argonaute                                           | 0.94 | 1.75  | 1.78  |
| SPAC9.08c     |              | steroid reductase (predicted)                       | steroid reductase (predicted)                       | 0.99 | 1.69  | 1.70  |
| SPCC16C4.02c  |              | DUF1941 family protein                              | DUF1941 family protein                              | 1.14 | 1.79  | 1.57  |
| SPAC29A4.17c  |              | FUN14 family protein                                | FUN14 family protein                                | 1.04 | 6.70  | 3.68  |
| SPBP8B7.28c   |              | sequence orphan                                     |                                                     | 0.76 | 1.84  | 1.75  |
| SPAC16E8.16   |              | transcription factor TFIIB                          | transcription factor TFIIB (PMID 12359329)          | 0.99 | 2.28  | 1.67  |
| SPAPJ696.01c  | <i>vps17</i> | retromer complex subunit Vps17                      | retromer complex subunit Vps17                      | 1.01 | 1.94  | 1.89  |
| SPAC6G10.03c  |              | abhydrolase family protein, unknown biological role | abhydrolase family protein, unknown biological role | 0.91 | 2.48  | 3.11  |
| SPBC17D11.02c |              | synoviolin homolog                                  |                                                     | 0.83 | 1.74  | 1.89  |
| SPAC6G9.06c   | <i>pcp1</i>  | pericentrin Pcp1                                    | pericentrin Pcp1                                    | 0.76 | 1.87  | 1.83  |
| SPBC365.05c   | <i>slu7</i>  | splicing factor Slu7                                |                                                     | 0.85 | 1.97  | 2.09  |

|               |              |                                                              |                                                                        |      |       |       |
|---------------|--------------|--------------------------------------------------------------|------------------------------------------------------------------------|------|-------|-------|
| SPAC1783.06c  | <i>atg12</i> | autophagy associated protein Atg12                           | autophagy associated protein Atg12                                     | 0.91 | 2.09  | 2.07  |
| SPBP4H10.12   |              | conserved protein (fungal and bacterial)                     |                                                                        | 1.00 | 4.45  | 3.70  |
| SPAC19G12.09  |              | NADH/NADPH dependent indole-3-acetaldehyde reductase AKR3C2  | NADH/NADPH dependent indole-3-acetaldehyde reductase AKR3C2            | 1.15 | 5.03  | 3.49  |
| SPBC336.08    | <i>spc24</i> | spindle pole body protein Spc24                              |                                                                        | 0.90 | 2.43  | 1.83  |
| SPBC725.13c   | <i>psf2</i>  | GIN5 complex subunit Psf2                                    |                                                                        | 0.80 | 2.01  | 1.58  |
| SPBC23G7.06c  |              | conserved eukaryotic protein                                 |                                                                        | 0.62 | 4.32  | 3.60  |
| SPAC343.06c   |              | phospholipid scramblase                                      | scramblase                                                             | 0.70 | 1.87  | 2.21  |
| SPCC162.02c   |              | AMP-binding dehydrogenase (predicted)                        | AMP-binding dehydrogenase (predicted)                                  | 0.96 | 5.05  | 7.72  |
| SPCC569.03    |              | DUF1773 family protein 4                                     | DUF1773 family protein 4                                               | 0.65 | 4.48  | 2.13  |
| SPBPB7E8.02   |              | PSP1 family protein                                          |                                                                        | 1.03 | 3.99  | 6.08  |
| SPBC725.03    |              | conserved fungal protein                                     |                                                                        | 1.45 | 18.38 | 5.29  |
| SPAC4H3.04c   |              | UPF0103 family                                               | UPF0103 family                                                         | 0.49 | 17.26 | 19.52 |
| SPCC1183.03c  |              | frataxin homolog                                             | frataxin homolog                                                       | 0.82 | 1.64  | 1.83  |
| SPAC1002.05c  | <i>jmj2</i>  | histone demethylase Jmj2 (predicted)                         | histone demethylase Jmj2 (predicted)                                   | 0.83 | 4.29  | 4.18  |
| SPAC1D4.03c   | <i>aut12</i> | autophagy associated protein Aut12 (predicted)               | autophagy associated protein Aut12                                     | 0.88 | 2.57  | 2.46  |
| SPAC17A2.15   |              | dubious                                                      | dubious                                                                | 0.51 | 1.53  | 4.99  |
| SPAC4D7.02c   |              | glycerophosphoryl diester phosphodiesterase (predicted)      | glycerophosphoryl diester phosphodiesterase (predicted)                | 0.74 | 5.32  | 4.89  |
| SPAC20G4.03c  | <i>hri1</i>  | eIF2 alpha kinase Hri1                                       | eIF2 alpha kinase Hri1                                                 | 0.92 | 5.40  | 8.74  |
| SPAC17H9.19c  | <i>cdt2</i>  | WD repeat protein Cdt2                                       | WD repeat protein Cdt2                                                 | 1.09 | 1.62  | 4.63  |
| SPCC970.11c   | <i>wtf9</i>  | wtf element, Wtf2, pseudo                                    | wtf element, Wtf2, pseudo                                              | 1.02 | 2.52  | 2.94  |
| SPBC27B12.01c | <i>mmm1</i>  | Mdm10/Mdm12/Mmm1 complex subunit Mmm1 (predicted)            |                                                                        | 1.27 | 3.54  | 2.21  |
| SPCC622.07    |              | dubious                                                      | dubious                                                                | 0.97 | 2.01  | 1.89  |
| SPAPB8E5.04c  |              | Niemann-Pick disease type C2 protein hE1 homolog             | phosphatidylglycerol/phosphatidylinositol transfer protein (predicted) | 0.92 | 2.17  | 2.29  |
| SPCC737.09c   | <i>hmt1</i>  | ATP-binding cassette-type vacuolar membrane transporter Hmt1 |                                                                        | 1.21 | 3.02  | 2.43  |
| SPAC1687.22c  | <i>puf3</i>  | RNA-binding protein Puf3 (predicted)                         |                                                                        | 0.73 | 2.94  | 2.95  |
| SPBP35G2.14   |              | RNA-binding protein                                          |                                                                        | 0.88 | 1.74  | 2.24  |
| SPBC3H7.13    |              | FHA domain protein Far10 (predicted)                         |                                                                        | 0.90 | 1.68  | 1.69  |
| SPAC16A10.06c | <i>nse2</i>  | Smc5-6 complex non-SMC subunit 2                             | Smc5-6 complex non-SMC subunit 2 (PMID 12966087)                       | 0.92 | 2.05  | 2.03  |
| SPBC12C2.10c  | <i>pst1</i>  | Clr6 histone deacetylase complex subunit Pst1                |                                                                        | 0.82 | 1.66  | 1.91  |

|              |              |                                                              |                                                              |      |       |       |
|--------------|--------------|--------------------------------------------------------------|--------------------------------------------------------------|------|-------|-------|
| SPAC6B12.03c |              | HbrB family protein                                          | HbrB family protein                                          | 0.52 | 64.14 | 97.09 |
| SPAC4G9.12   |              | gluconokinase                                                | gluconokinase                                                | 1.13 | 3.76  | 3.56  |
| SPAC23H3.03c |              | nitrogen permease regulator family                           | nitrogen permease regulator family                           | 0.81 | 1.58  | 1.74  |
| SPAC25G10.01 |              | RNA-binding protein                                          | RNA-binding protein                                          | 1.39 | 2.88  | 2.05  |
| SPBC405.05   |              | sequence orphan                                              |                                                              | 1.01 | 2.01  | 1.86  |
| SPAC1D4.12   | <i>rad15</i> | transcription factor TFIIH complex subunit Rad15             | transcription factor TFIIH complex subunit Rad15             | 0.83 | 1.76  | 2.01  |
| SPAC17C9.11c |              | zinc finger protein, zf-C2H2 type/UBA domain protein         | zinc finger protein                                          | 0.95 | 3.84  | 2.58  |
| SPCC569.06   |              | <i>S. pombe</i> specific multicopy membrane protein family 1 | <i>S. pombe</i> specific multicopy membrane protein family 1 | 0.85 | 2.22  | 2.26  |
| SPCC285.09c  | <i>cgs2</i>  | cAMP-specific phosphodiesterase Cgs2                         | cAMP-specific phosphodiesterase Cgs2                         | 1.02 | 2.13  | 1.98  |
| SPAC2G11.04  |              | RNA-binding protein, G-patch type (predicted)                | RNA-binding protein (predicted)                              | 1.03 | 1.63  | 1.98  |
| SPCC1235.04c |              | FAD synthetase                                               | FAD synthetase                                               | 0.97 | 1.76  | 2.18  |
| SPBC776.06c  |              | spindle pole body interacting protein (predicted)            |                                                              | 0.78 | 1.51  | 1.93  |
| SPCC285.04   |              | transthyretin (predicted)                                    | transthyretin (predicted)                                    | 0.76 | 3.10  | 3.66  |
| SPAC4F8.01   | <i>did4</i>  | vacuolar sorting protein Did4                                |                                                              | 0.90 | 1.71  | 1.59  |
| SPCC162.12   | <i>tco89</i> | TORC1 subunit Tco89                                          | sequence orphan                                              | 0.86 | 2.17  | 2.52  |
| SPAC15E1.10  |              | PI31 proteasome regulator related                            |                                                              | 0.78 | 4.40  | 4.21  |
| SPCC1183.09c | <i>pmp31</i> | plasma membrane proteolipid Pmp31                            | plasma membrane proteolipid Pmp31                            | 1.04 | 2.14  | 2.04  |
| SPAC17A2.09c | <i>csx1</i>  | RNA-binding protein Csx1                                     | RNA-binding protein Csx1                                     | 0.70 | 1.60  | 2.84  |
| SPAC6F12.03c | <i>fsv1</i>  | SNARE Fsv1                                                   | SNARE Fsv1                                                   | 1.03 | 2.98  | 2.45  |
| SPAP14E8.04  | <i>oma1</i>  | metallopeptidase Oma1 (predicted)                            | metallopeptidase Oma1 (predicted)                            | 1.27 | 3.09  | 2.23  |
| SPBC1348.12  |              | zinc finger protein                                          |                                                              | 1.25 | 2.50  | 3.26  |
| SPAC19A8.02  |              | pleckstrin homology domain protein                           | transcriptional coactivator (predicted)                      | 0.90 | 2.17  | 2.62  |
| SPAC16E8.09  | <i>scd1</i>  | RhoGEF Scd1                                                  | RhoGEF Scd1                                                  | 0.83 | 1.56  | 1.89  |
| SPAC29E6.09  |              | sequence orphan                                              | sequence orphan                                              | 0.90 | 3.22  | 2.62  |
| SPBC947.15c  |              | NADH dehydrogenase                                           |                                                              | 0.93 | 3.82  | 2.68  |
| SPBC16G5.07c |              | prohibitin (predicted)                                       |                                                              | 0.97 | 2.29  | 1.82  |
| SPAC12G12.12 |              | NST UDP-galactose transporter (predicted)                    | NST UDP-galactose transporter                                | 0.90 | 2.42  | 1.52  |
| SPAC824.05   | <i>vps16</i> | HOPS complex subunit Vps16 (predicted)                       | HOPS complex subunit Vps16 (predicted)                       | 1.05 | 2.13  | 1.84  |
| SPBC21C3.20c | <i>git1</i>  | C2 domain protein Git1                                       |                                                              | 0.80 | 1.67  | 2.49  |
| SPBC1289.15  |              | glycoprotein (predicted)                                     |                                                              | 1.20 | 1.86  | 1.75  |

|               |              |                                                                    |                                                    |      |       |       |
|---------------|--------------|--------------------------------------------------------------------|----------------------------------------------------|------|-------|-------|
| SPAC513.02    |              | phosphoglycerate mutase family                                     | phosphoglycerate mutase family                     | 0.88 | 16.35 | 3.41  |
| SPBC1685.14c  |              | Vid27 family protein                                               | Vid27 family protein                               | 1.12 | 3.41  | 3.31  |
| SPAC57A10.06  | <i>mug15</i> | sequence orphan                                                    | sequence orphan                                    | 1.44 | 1.96  | 1.66  |
| SPAC4F8.10c   | <i>stg1</i>  | SM22/transgelin-like actin modulating protein Stg1                 | SM22/transgelin-like actin modulating protein Stg1 | 0.94 | 1.75  | 1.62  |
| SPAC806.04c   |              | DUF89 family protein                                               | DUF89 family protein                               | 1.00 | 2.18  | 1.54  |
| SPAC23C4.07   | <i>tht2</i>  | meiotically upregulated gene Mug22                                 | meiotically upregulated gene Mug22                 | 0.79 | 1.90  | 3.00  |
| SPAC3C7.13c   |              | glucose-6-phosphate 1-dehydrogenase (predicted)                    | glucose-6-phosphate 1-dehydrogenase (predicted)    | 0.77 | 17.22 | 6.90  |
| SPCC645.02    |              | conserved protein (fungal and plant)                               | conserved protein (fungal and plant)               | 1.00 | 3.20  | 2.12  |
| SPAC19B12.08  |              | peptidase family C54                                               | peptidase family C54                               | 1.31 | 6.81  | 4.38  |
| SPBC1105.14   | <i>rsv2</i>  | transcription factor Rsv2                                          |                                                    | 1.01 | 4.86  | 4.06  |
| SPAC24C9.08   |              | vacuolar carboxypeptidase (predicted)                              | vacuolar carboxypeptidase (predicted)              | 0.75 | 3.45  | 2.45  |
| SPAC5H10.02c  |              | ThiJ domain protein                                                | ThiJ domain protein                                | 1.31 | 33.31 | 2.47  |
| SPAC22F3.05c  | <i>alp41</i> | ADP-ribosylation factor Alp41                                      | ADP-ribosylation factor Alp41                      | 1.03 | 2.49  | 1.93  |
| SPCC965.11c   |              | amino acid transporter (predicted)                                 | amino acid transporter (predicted)                 | 0.87 | 2.02  | 1.60  |
| SPAC1527.02   | <i>sft2</i>  | Golgi transport protein Sft2 (predicted)                           | Golgi transport protein Sft2 (predicted)           | 1.04 | 1.51  | 1.83  |
| SPBC31F10.10c |              | zf-MYND type zinc finger protein                                   |                                                    | 0.92 | 2.26  | 3.14  |
| SPAC29A4.06c  |              | human CCDC55 homolog                                               | human CCDC55 homolog                               | 0.92 | 2.15  | 1.79  |
| SPAC23A1.14c  |              | uncharacterised trans-sulfuration enzyme (predicted)               | cystathionine gamma-synthase (predicted)           | 0.98 | 3.48  | 3.04  |
| SPAC1002.17c  | <i>urg2</i>  | uracil phosphoribosyltransferase (predicted)                       | uracil phosphoribosyltransferase (predicted)       | 0.24 | 2.25  | 3.18  |
| SPBC15D4.02   |              | transcription factor, zf-fungal binuclear cluster type (predicted) |                                                    | 1.23 | 1.62  | 2.98  |
| SPAC17G6.04c  | <i>cpp1</i>  | protein farnesyltransferase beta subunit Cpp1                      | protein farnesyltransferase beta subunit Cpp1      | 0.92 | 2.02  | 1.91  |
| SPAC222.13c   |              | 6-phosphofructo-2-kinase (predicted)                               | 6-phosphofructo-2-kinase (predicted)               | 0.98 | 1.81  | 1.83  |
| SPBC16E9.03c  |              | DUF1783 family protein                                             |                                                    | 1.17 | 2.64  | 1.73  |
| SPBC776.18c   | <i>pmh1</i>  | transcription factor TFIIH complex subunit Pmh1                    |                                                    | 0.84 | 1.69  | 1.65  |
| SPCC794.01c   |              | glucose-6-phosphate 1-dehydrogenase (predicted)                    | glucose-6-phosphate 1-dehydrogenase (predicted)    | 0.44 | 15.14 | 38.16 |
| SPAPB1A10.02  |              | chromosome segregation protein (predicted)                         | chromosome segregation protein (predicted)         | 0.99 | 1.70  | 1.81  |
| SPBC27B12.04c |              | conserved eukaryotic protein                                       |                                                    | 0.76 | 2.55  | 2.94  |
| SPBC8D2.01    | <i>gsk31</i> | serine/threonine protein kinase Gsk31                              |                                                    | 0.99 | 2.17  | 1.94  |
| SPAC3A11.14c  | <i>pk11</i>  | kinesin-like protein Pk11                                          | kinesin-like protein Pk11                          | 0.94 | 2.10  | 1.73  |

|               |               |                                                                    |                                                  |      |       |       |
|---------------|---------------|--------------------------------------------------------------------|--------------------------------------------------|------|-------|-------|
| SPCC1739.10   | <i>mug33</i>  | conserved fungal protein                                           | conserved fungal protein                         | 1.07 | 1.60  | 1.68  |
| SPBC21D10.06c | <i>map4</i>   | cell agglutination protein Map4                                    |                                                  | 0.84 | 9.74  | 30.89 |
| SPAC1002.12c  |               | succinate-semialdehyde dehydrogenase (predicted)                   | succinate-semialdehyde dehydrogenase (predicted) | 1.04 | 3.99  | 2.37  |
| SPBC405.02c   |               | sequence orphan                                                    |                                                  | 0.96 | 1.87  | 2.70  |
| SPCC594.04c   |               | steroid oxidoreductase superfamily protein                         | steroid oxidoreductase superfamily protein       | 0.83 | 3.32  | 2.72  |
| SPAC25B8.19c  |               | transcription factor, zf-fungal binuclear cluster type (predicted) |                                                  | 1.03 | 2.07  | 2.62  |
| SPAC32A11.02c |               | conserved fungal protein                                           | conserved fungal protein                         | 0.83 | 10.84 | 3.21  |
| SPBPB2B2.10c  |               | galactose-1-phosphate uridylyltransferase (predicted)              |                                                  | 0.81 | 12.08 | 9.67  |
| SPBC16H5.13   |               | WD repeat protein, human WDR7 ortholog                             |                                                  | 0.99 | 1.83  | 1.72  |
| SPBC3B8.10c   |               | NLI interacting factor family                                      |                                                  | 0.79 | 1.94  | 3.13  |
| SPAC458.04c   |               | sequence orphan                                                    | sequence orphan                                  | 0.62 | 9.40  | 9.91  |
| SPAC1F7.12    | <i>yak3</i>   | aldose reductase YakC                                              |                                                  | 0.95 | 5.54  | 3.69  |
| SPAC343.17c   |               | WD repeat protein, human WDR70 family                              | WD repeat protein, human WDR70 family            | 0.81 | 1.52  | 1.55  |
| SPBC1604.18c  |               | vacuolar sorting protein (predicted)                               |                                                  | 0.80 | 1.87  | 2.35  |
| SPBC354.13    | <i>rga6</i>   | GTPase activating protein Rga6                                     | GTPase activating protein Rga6                   | 1.00 | 1.75  | 1.75  |
| SPAC13C5.06c  | <i>mug121</i> | sequence orphan                                                    | sequence orphan                                  | 0.74 | 2.83  | 2.62  |
| SPCC364.04c   |               | CASP family protein                                                | CASP family protein                              | 0.98 | 1.59  | 1.69  |
| SPCC1442.01   | <i>ste6</i>   | guanyl-nucleotide exchange factor Ste6                             | guanyl-nucleotide exchange factor Ste6           | 0.98 | 7.40  | 15.76 |
| SPBC32H8.07   | <i>git5</i>   | heterotrimeric G protein beta subunit Git5                         |                                                  | 0.79 | 4.15  | 6.45  |
| SPBC365.20c   |               | nicotinamidase (predicted)                                         |                                                  | 1.09 | 2.29  | 2.09  |
| SPAC25A8.02   |               | sequence orphan                                                    | sequence orphan                                  | 0.96 | 3.25  | 2.95  |
| SPAC343.03    | <i>apc11</i>  | anaphase-promoting complex subunit Apc11                           | anaphase-promoting complex subunit Apc11         | 1.12 | 2.03  | 1.87  |
| SPAC9.13c     | <i>cwf16</i>  | splicing factor (predicted)                                        |                                                  | 0.89 | 2.05  | 2.29  |
| SPAC1B3.15c   |               | membrane transporter                                               | membrane transporter                             | 0.85 | 1.96  | 1.76  |
| SPCC1919.01   | <i>ppk34</i>  | serine/threonine protein kinase Ppk34                              | serine/threonine protein kinase Ppk34            | 0.86 | 2.65  | 2.24  |
| SPAC4F10.16c  |               | P-type ATPase                                                      | P-type ATPase (PMID 12707717)                    | 0.63 | 2.79  | 2.87  |
| SPBC29A10.02  | <i>spo5</i>   | meiotic RNA-binding protein 1                                      | meiotic RNA-binding protein 1                    | 0.88 | 1.58  | 4.66  |
| SPAPB1A10.07c |               | sphingolipid biosynthesis protein                                  | sphingolipid biosynthesis protein                | 0.90 | 2.01  | 2.50  |
| SPAC2G11.13   | <i>atg22</i>  | autophagy associated protein Atg22 (predicted)                     | autophagy associated protein Atg22 (predicted)   | 1.02 | 6.29  | 4.38  |

|               |              |                                                                                                                 |                                                     |      |       |       |
|---------------|--------------|-----------------------------------------------------------------------------------------------------------------|-----------------------------------------------------|------|-------|-------|
| SPBC16C6.04   |              | sequence orphan                                                                                                 |                                                     | 0.77 | 2.02  | 2.53  |
| SPBC3H7.03c   |              | 2-oxoglutarate dehydrogenase (lipoamide)<br>(e1 component of oxoglutarate<br>dehydrogenase complex) (predicted) |                                                     | 0.94 | 2.28  | 2.00  |
| SPBC30D10.03c |              | IMP 5'-nucleotidase (predicted)                                                                                 |                                                     | 1.03 | 1.76  | 1.62  |
| SPAC19A8.03   |              | phosphatidylinositol-3-phosphatase<br>(predicted)                                                               | phosphatidylinositol-3-phosphatase<br>(predicted)   | 0.78 | 1.86  | 2.57  |
| SPBC8E4.05c   |              | fumarate lyase superfamily                                                                                      |                                                     | 0.62 | 24.32 | 3.46  |
| SPAC11E3.14   |              | conserved protein                                                                                               | conserved protein                                   | 0.77 | 4.14  | 4.10  |
| SPBC32H8.02c  | <i>nep2</i>  | NEDD8 protease Nep2                                                                                             |                                                     | 0.88 | 3.02  | 3.74  |
| SPAC14C4.01c  |              | DUF1770 family protein                                                                                          | DUF1770 family protein                              | 1.17 | 12.66 | 8.58  |
| SPCC1739.04c  |              | sequence orphan                                                                                                 | sequence orphan                                     | 0.88 | 2.12  | 1.99  |
| SPCC285.07c   | <i>wtf18</i> | wtf element Wtf18                                                                                               | wtf element Wtf18                                   | 1.03 | 4.91  | 4.83  |
| SPBC3B9.10    | <i>vti1</i>  | SNARE Vti1                                                                                                      |                                                     | 1.01 | 1.59  | 1.94  |
| SPBC337.02c   |              | pseudogene                                                                                                      |                                                     | 0.88 | 2.13  | 1.96  |
| SPCC4B3.16    | <i>tip41</i> | TIP41-like type 2a phosphatase regulator<br>Tip41                                                               | TIP41-like type 2a phosphatase<br>regulator Tip41   | 0.98 | 1.88  | 2.25  |
| SPAC6F12.02   | <i>rst2</i>  | transcription factor Rst2                                                                                       | transcription factor Rst2                           | 1.09 | 2.67  | 2.30  |
| SPCC338.18    |              | sequence orphan                                                                                                 | sequence orphan                                     | 0.89 | 15.60 | 12.11 |
| SPBC1773.06c  |              | alcohol dehydrogenase (predicted)                                                                               | alcohol dehydrogenase (predicted)                   | 0.73 | 3.47  | 2.34  |
| SPAC25B8.08   |              | conserved fungal family                                                                                         | conserved fungal family                             | 0.81 | 2.44  | 3.35  |
| SPCC1795.01c  | <i>mad3</i>  | mitotic spindle checkpoint protein Mad3                                                                         | mitotic spindle checkpoint protein Mad3             | 0.80 | 1.66  | 1.63  |
| SPAC29B12.13  |              | carbon-sulfur lyase (predicted)                                                                                 | carbon-sulfur lyase (predicted)                     | 1.10 | 8.45  | 3.67  |
| SPAC589.08c   | <i>dam1</i>  | DASH complex subunit Dam1                                                                                       | DASH complex subunit Dam1                           | 1.09 | 2.42  | 1.56  |
| SPBC725.10    |              | tspO homolog                                                                                                    |                                                     | 0.59 | 7.60  | 9.22  |
| SPAC2C4.17c   |              | MS ion channel protein 2                                                                                        | MS ion channel protein 2                            | 0.95 | 4.03  | 4.57  |
| SPAC22G7.08   | <i>ppk8</i>  | serine/threonine protein kinase Ppk8<br>(predicted)                                                             | serine/threonine protein kinase Ppk8<br>(predicted) | 0.67 | 3.47  | 3.56  |
| SPAPJ760.02c  | <i>app1</i>  | App1 protein                                                                                                    | App1 protein                                        | 0.84 | 1.50  | 1.65  |
| SPBC215.03c   | <i>csn1</i>  | COP9/signalosome complex subunit Csn1                                                                           |                                                     | 0.89 | 1.91  | 1.56  |
| SPAC16A10.08c | <i>mug74</i> | sequence orphan                                                                                                 |                                                     | 0.97 | 2.15  | 2.30  |
| SPCC663.03    | <i>pmd1</i>  | leptomycin efflux transporter Pmd1                                                                              | leptomycin efflux transporter Pmd1                  | 1.39 | 1.68  | 1.54  |
| SPBC20F10.05  |              | DuF1740 family protein                                                                                          |                                                     | 0.87 | 1.74  | 1.68  |
| SPAC17G6.12   | <i>cul1</i>  | cullin 1                                                                                                        | cullin 1                                            | 1.02 | 2.31  | 1.95  |

|               |              |                                                                              |                                                             |      |       |       |
|---------------|--------------|------------------------------------------------------------------------------|-------------------------------------------------------------|------|-------|-------|
| SPBC17A3.03c  |              | phosphoprotein phosphatase (predicted)                                       |                                                             | 0.99 | 2.31  | 1.62  |
| SPAC1687.09   |              | ENTH domain protein (predicted)                                              | conserved fungal protein                                    | 0.95 | 1.79  | 1.68  |
| SPBC651.02    |              | nitrilase (predicted)                                                        |                                                             | 1.11 | 2.26  | 1.86  |
| SPACUNK4.08   |              | dipeptidyl aminopeptidase (predicted)                                        | dipeptidyl aminopeptidase (predicted)                       | 0.97 | 2.19  | 2.50  |
| SPAC2F3.16    |              | ubiquitin-protein ligase E3 (predicted)                                      | ubiquitin-protein ligase E3 (predicted)                     | 1.09 | 3.51  | 2.33  |
| SPCC576.04    |              | bax inhibitor-like protein                                                   | bax inhibitor-like protein                                  | 1.03 | 3.66  | 3.04  |
| SPAPB15E9.02c |              | dubious                                                                      | dubious                                                     | 0.79 | 1.69  | 2.35  |
| SPBC887.15c   |              | sphingosine hydroxylase (predicted)                                          |                                                             | 1.14 | 1.99  | 2.27  |
| SPCC548.03c   | <i>wtf4</i>  | wtf element Wtf4, pseudo                                                     | wtf element Wtf4, pseudo                                    | 0.17 | 6.70  | 34.45 |
| SPAC4D7.11    |              | conserved fungal protein                                                     | conserved fungal protein                                    | 1.07 | 1.98  | 2.21  |
| SPAC20H4.11c  | <i>rho5</i>  | Rho family GTPase Rho5                                                       | Rho family GTPase Rho5                                      | 1.07 | 10.67 | 9.76  |
| SPBC32F12.15  | <i>tfb5</i>  | transcription factor TFIIH complex subunit Tfb5 (predicted)                  | transcription factor TFIIH complex subunit Tfb5 (predicted) | 1.22 | 1.97  | 1.83  |
| SPAC22F3.12c  | <i>rgs1</i>  | regulator of G-protein signaling Rgs1                                        | regulator of G-protein signaling Rgs1                       | 1.20 | 14.48 | 17.46 |
| SPBC23E6.09   | <i>ssn6</i>  | transcriptional corepressor Ssn6                                             |                                                             | 0.70 | 2.35  | 3.18  |
| SPAC2F7.06c   | <i>pol4</i>  | DNA polymerase X family                                                      | DNA polymerase X family                                     | 0.39 | 22.72 | 45.09 |
| SPAC13A11.04c | <i>ubp8</i>  | ubiquitin C-terminal hydrolase Ubp8 (predicted)                              | ubiquitin C-terminal hydrolase Ubp8                         | 0.94 | 3.51  | 2.96  |
| SPBC1709.14   |              | peptide N-glycanase (predicted)                                              |                                                             | 0.98 | 2.10  | 2.03  |
| SPBP8B7.26    |              | sequence orphan                                                              |                                                             | 0.90 | 2.15  | 2.01  |
| SPCC63.08c    | <i>ppk36</i> | serine/threonine protein kinase Ppk36                                        | serine/threonine protein kinase Ppk36                       | 0.85 | 3.25  | 3.19  |
| SPCC1672.06c  | <i>asp1</i>  | inositol hexakisphosphate kinase/inositol pyrophosphate synthase (predicted) | inositol hexakisphosphate kinase (predicted)                | 0.87 | 1.97  | 2.66  |
| SPAC19G12.02c | <i>pms1</i>  | MutL family mismatch-repair protein Pms1                                     | MutL family mismatch-repair protein Pms1                    | 1.10 | 2.53  | 1.60  |
| SPAC20H4.09   |              | ATP-dependent RNA helicase, spliceosomal (predicted)                         | ATP-dependent RNA helicase, spliceosomal (predicted)        | 1.09 | 1.78  | 1.62  |
| SPCC1672.04c  |              | mitochondrial copper chaperone                                               | mitochondrial copper ion transport protein                  | 1.04 | 2.73  | 2.04  |
| SPAC823.09c   |              | L-asparaginase (predicted)                                                   | L-asparaginase (predicted)                                  | 1.35 | 3.06  | 1.60  |
| SPBC13E7.02   | <i>cwf24</i> | zf-C3HC4 type (RING finger)/GCN5-related N acetyltransferase fusion protein  |                                                             | 0.60 | 1.54  | 2.20  |
| SPBC543.04    |              | UPF0171 family protein                                                       |                                                             | 0.76 | 2.05  | 1.76  |
| SPBC725.11c   | <i>php2</i>  | CCAAT-binding factor complex subunit Php2                                    |                                                             | 1.12 | 2.42  | 3.03  |



|               |                |                                                          |                                                  |      |       |       |
|---------------|----------------|----------------------------------------------------------|--------------------------------------------------|------|-------|-------|
| SPAC6B12.07c  |                | ubiquitin-protein ligase E3 (predicted)                  | ubiquitin-protein ligase E3 (predicted)          | 0.78 | 1.61  | 1.68  |
| SPAC4H3.03c   |                | glucan 1,4-alpha-glucosidase (predicted)                 | glucan 1,4-alpha-glucosidase (predicted)         | 0.49 | 40.20 | 65.44 |
| SPBC16A3.17c  |                | membrane transporter                                     |                                                  | 0.79 | 3.77  | 2.04  |
| SPAC458.03    | <i>tel2</i>    | Tel2/Rad-5/Clk-2 family protein Tel2                     | nuclear telomere cap complex subunit (predicted) | 0.78 | 1.88  | 1.87  |
| SPCC4G3.03    |                | WD repeat protein                                        | WD repeat protein                                | 0.87 | 6.72  | 5.92  |
| SPBC19F5.01c  | <i>puc1</i>    | cyclin Puc1                                              |                                                  | 0.71 | 4.11  | 3.80  |
| SPBC1271.08c  |                | sequence orphan                                          | sequence orphan                                  | 1.41 | 24.12 | 2.79  |
| SPBC25H2.03   |                | vacuolar protein involved in phosphoinositide metabolism |                                                  | 1.00 | 2.20  | 2.51  |
| SPAPB24D3.04c | <i>mag1</i>    | DNA-3-methyladenine glycosylase Mag1                     | DNA-3-methyladenine glycosylase Mag1             | 0.89 | 4.67  | 2.92  |
| SPAC26H5.04   |                | vacuolar import and degradation protein Vid28            | vacuolar import and degradation protein Vid28    | 0.71 | 3.33  | 3.25  |
| SPBC15D4.01c  |                | kinesin-like protein                                     |                                                  | 1.14 | 2.54  | 1.82  |
| SPAC1B3.04c   |                | mitochondrial GTPase Guf1 (predicted)                    | mitochondrial GTPase Guf1 (predicted)            | 1.11 | 1.83  | 1.62  |
| SPAC1296.04   | <i>mug65</i>   | spore wall assembly protein (predicted)                  | spore wall assembly protein (predicted)          | 0.79 | 1.83  | 2.18  |
| SPAC8C9.16c   | <i>mug63</i>   | TLDC domain protein 1                                    | TLDC domain protein 1                            | 0.75 | 3.77  | 3.97  |
| SPCC61.03     |                | UPF0031 family protein                                   | conserved protein (broad species distribution)   | 1.15 | 3.55  | 1.90  |
| SPAC10F6.11c  |                | autophagy associated kinase activator (predicted)        | kinase activator (predicted)                     | 0.99 | 2.36  | 1.94  |
| SPAC14C4.10c  |                | Nudix family hydrolase                                   | Nudix family hydrolase                           | 1.02 | 2.68  | 2.09  |
| SPCC1393.07c  | <i>mug4</i>    | sequence orphan                                          | sequence orphan                                  | 1.17 | 1.97  | 5.57  |
| SPCC16A11.08  | <i>atg20</i>   | sorting nexin Atg20                                      | sorting nexin Atg20                              | 1.26 | 5.88  | 3.85  |
| SPMIT.08      |                | mitochondrial ribosomal small subunit                    |                                                  | 0.98 | 3.41  | 2.78  |
| SPBC1778.02   | <i>rap1</i>    | telomere binding protein Rap1                            |                                                  | 0.79 | 1.85  | 2.53  |
| SPBC19F8.03c  |                | clathrin binding protein                                 |                                                  | 1.10 | 1.57  | 1.67  |
| SPBC11G11.01  | <i>fis1</i>    | mitochondrial fission protein Fis1 (predicted)           | mitochondrial fission protein Fis1 (predicted)   | 1.15 | 2.03  | 1.75  |
| SPCC1827.07c  |                | SPX/EXS domain protein                                   | SPX/EXS domain protein                           | 1.05 | 2.58  | 1.98  |
| SPAC24C9.07c  | <i>bgs2</i>    | 1,3-beta-glucan synthase subunit Bgs2                    | 1,3-beta-glucan synthase subunit Bgs2            | 1.01 | 1.92  | 2.55  |
| SPBC16C6.02c  | <i>vps1302</i> | chorein homolog                                          |                                                  | 0.86 | 2.23  | 2.59  |
| SPBC146.12    | <i>coq6</i>    | monooxygenase Coq6                                       |                                                  | 0.92 | 1.82  | 1.78  |
| SPBC25B2.10   |                | Usp (universal stress protein) family protein            |                                                  | 0.94 | 2.96  | 2.15  |

|               |               |                                                         |                                                         |      |       |      |
|---------------|---------------|---------------------------------------------------------|---------------------------------------------------------|------|-------|------|
| SPAC922.07c   |               | aldehyde dehydrogenase (predicted)                      | aldehyde dehydrogenase (predicted)                      | 0.81 | 5.05  | 1.68 |
| SPAC977.04    |               | pseudogene                                              | pseudogene                                              | 0.72 | 1.55  | 2.18 |
| SPBC725.02    | <i>mpr1</i>   | response regulator phosphotransferase                   |                                                         | 1.13 | 2.27  | 2.13 |
| SPAC25B8.13c  | <i>isp7</i>   | 2-OG-Fe(II) oxygenase superfamily protein               | 2-OG-Fe(II) oxygenase superfamily protein               | 0.54 | 8.46  | 3.47 |
| SPCC584.02    | <i>cuf2</i>   | Cu metalloregulatory transcription factor Cuf2          | Cu metalloregulatory transcription factor Cuf2          | 0.71 | 2.92  | 2.78 |
| SPBC3H7.06c   | <i>pof9</i>   | F-box protein Pof9                                      |                                                         | 1.24 | 3.14  | 3.38 |
| SPAC1565.03   |               | sequence orphan                                         | sequence orphan                                         | 0.77 | 3.65  | 6.94 |
| SPAPB18E9.02c | <i>ppk18</i>  | serine/threonine protein kinase Ppk18 (predicted)       | serine/threonine protein kinase Ppk18 (predicted)       | 0.88 | 2.20  | 2.44 |
| SPAC16C9.01c  |               | carbohydrate kinase (predicted)                         | carbohydrate kinase (predicted)                         | 1.24 | 3.90  | 1.88 |
| SPBC691.01    |               | palmitoyltransferase (predicted)                        |                                                         | 0.77 | 1.84  | 2.43 |
| SPAC1039.11c  |               | alpha-glucosidase                                       | alpha-glucosidase                                       | 1.11 | 1.56  | 2.05 |
| SPBC21C3.12c  |               | DUF953 family protein                                   |                                                         | 0.96 | 1.53  | 1.65 |
| SPCC663.17    | <i>wtf15</i>  | wtf element Wtf15, pseudo                               | wtf element Wtf15, pseudo                               | 0.78 | 2.31  | 3.64 |
| SPCC31H12.06  | <i>mug111</i> | sequence orphan                                         | sequence orphan                                         | 0.94 | 2.25  | 2.63 |
| SPBC660.08    |               | sequence orphan                                         | sequence orphan                                         | 1.20 | 2.02  | 1.81 |
| SPAC1782.12c  |               | DUF423 protein                                          | conserved protein (broad species distribution)          | 0.93 | 4.61  | 3.67 |
| SPBPB2B2.12c  |               | UDP-glucose 4-epimerase                                 |                                                         | 1.33 | 16.93 | 5.67 |
| SPBC25B2.02c  | <i>mam1</i>   | M-factor transporter Mam1                               |                                                         | 0.96 | 2.97  | 3.22 |
| SPAC3A11.09   | <i>sod22</i>  | plasma membrane alkali metal cation/H+ antiporter Sod22 | plasma membrane alkali metal cation/H+ antiporter Sod22 | 1.07 | 1.72  | 1.51 |
| SPBC713.07c   |               | vacuolar polyphosphatase (predicted)                    |                                                         | 0.82 | 2.28  | 1.80 |
| SPCC550.10    | <i>meu8</i>   | aldehyde dehydrogenase Meu8 (predicted)                 | betaine aldehyde dehydrogenase (predicted)              | 0.91 | 2.10  | 2.73 |
| SPCC1442.04c  |               | conserved fungal protein                                | conserved fungal protein                                | 0.88 | 1.78  | 2.48 |
| SPBC336.12c   | <i>cdc10</i>  | MBF transcription factor complex subunit Cdc10          |                                                         | 0.94 | 2.00  | 2.49 |
| SPBC27B12.05  |               | WD repeat protein                                       |                                                         | 0.85 | 1.92  | 2.41 |
| SPAC23H4.01c  |               | sterol binding ankyrin repeat protein                   | sterol binding ankyrin repeat protein                   | 0.92 | 1.73  | 2.34 |
| SPAC11E3.05   |               | ubiquitin-protein ligase E3                             | ubiquitin-protein ligase E3                             | 0.76 | 2.13  | 2.67 |
| SPBC146.01    | <i>med15</i>  | mediator complex subunit Med15 (predicted)              | mediator complex subunit Med15 (predicted)              | 0.95 | 2.44  | 1.66 |
| SPAC16E8.17c  |               | succinate-CoA ligase alpha subunit                      | succinate-CoA ligase (alpha subunit)                    | 1.02 | 1.63  | 1.70 |
| SPAC664.15    |               | CCR4-Not complex subunit Caf4/Mdv1 (predicted)          | CCR4-Not complex subunit Caf4/Mdv1 (predicted)          | 0.84 | 2.96  | 2.28 |

|               |               |                                                                      |                                                                                    |      |       |       |
|---------------|---------------|----------------------------------------------------------------------|------------------------------------------------------------------------------------|------|-------|-------|
| SPAC17G8.10c  | <i>dma1</i>   | mitotic spindle checkpoint protein Dma1                              | mitotic spindle checkpoint protein Dma1                                            | 1.12 | 2.83  | 2.41  |
| SPBC56F2.05c  |               | transcription factor (predicted)                                     |                                                                                    | 0.71 | 1.89  | 2.53  |
| SPCC1682.11c  |               | DUF580 family protein                                                | DUF580 family protein                                                              | 0.90 | 3.16  | 3.36  |
| SPCC417.11c   |               | glutamate-1-semialdehyde 2,1-aminomutaseaminotransferase (predicted) | glutamate-1-semialdehyde 2,1-aminomutaseaminotransferase (predicted)               | 1.43 | 2.47  | 2.51  |
| SPAC1834.11c  | <i>sec18</i>  | secretory pathway protein Sec18 (predicted)                          | secretory pathway protein Sec18 (predicted)                                        | 0.94 | 1.59  | 1.68  |
| SPMIT.04      | <i>cox3</i>   | cytochrome c oxidase 3                                               | cytochrome c oxidase 3; similar to <i>S. cerevisiae</i> Q0275                      | 0.96 | 5.38  | 5.52  |
| SPCC24B10.14c | <i>xf1</i>    | xrcc4 like factor                                                    | xrcc4 like factor                                                                  | 0.58 | 2.77  | 5.69  |
| SPAC16A10.01  |               | DUF1212 family protein                                               | DUF1212 family protein                                                             | 1.11 | 2.83  | 2.68  |
| SPBP8B7.18c   |               | phosphomethylpyrimidine kinase (predicted)                           |                                                                                    | 1.04 | 3.09  | 3.57  |
| SPCC417.07c   | <i>mto1</i>   | MT organizer Mto1                                                    | MT organizer Mto1                                                                  | 0.89 | 1.78  | 1.94  |
| SPAC1565.07c  |               | human CAND1/TIP120 ortholog                                          | TATA binding protein interacting protein (predicted)                               | 0.89 | 1.68  | 2.04  |
| SPBC713.06    | <i>adl1</i>   | DNA ligase (predicted)                                               | DNA ligase (predicted)                                                             | 0.87 | 3.34  | 3.79  |
| SPBC1711.12   |               | serine protease (predicted)                                          |                                                                                    | 0.94 | 1.62  | 1.51  |
| SPAC7D4.05    |               | hydrolase (predicted)                                                | hydrolase (predicted)                                                              | 1.07 | 2.23  | 1.82  |
| SPCC320.05    |               | sulphate transporter (predicted)                                     | sulphate transporter (predicted)                                                   | 1.00 | 4.09  | 2.42  |
| SPAC458.06    |               | phosphoinositide binding protein                                     | phosphoinositide binding protein                                                   | 0.95 | 1.78  | 1.97  |
| SPBP35G2.06c  | <i>nup131</i> | nucleoporin Nup131                                                   |                                                                                    | 0.79 | 2.27  | 2.01  |
| SPCC1450.12   |               | conserved fungal protein                                             | conserved fungal protein                                                           | 0.94 | 2.61  | 2.21  |
| SPCC70.02c    |               | mitochondrial ATPase inhibitor (predicted)                           | mitochondrial ATPase inhibitor (predicted)                                         | 0.95 | 3.07  | 2.03  |
| SPMIT.05      | <i>cob1</i>   | cytochrome b, Cob1                                                   | cytochrome b; respiratory chain complex III; similar to <i>S. cerevisiae</i> Q0105 | 0.52 | 1.57  | 3.13  |
| SPAC29A4.12c  | <i>mug108</i> | sequence orphan                                                      | sequence orphan                                                                    | 0.95 | 11.15 | 38.79 |
| SPBC1289.16c  |               | copper amine oxidase (predicted)                                     |                                                                                    | 0.67 | 25.57 | 13.15 |
| SPAC2F3.07c   |               | sequence orphan                                                      | sequence orphan                                                                    | 0.62 | 3.47  | 3.05  |
| SPAC644.08    |               | haloacid dehalogenase-like hydrolase                                 | haloacid dehalogenase-like hydrolase                                               | 1.06 | 2.32  | 1.65  |
| SPAC637.13c   |               | cytoskeletal signaling protein                                       | cytoskeletal signaling protein                                                     | 0.86 | 1.67  | 1.68  |
| SPAC2E1P3.05c |               | fungal cellulose binding domain protein                              | fungal cellulose binding domain protein                                            | 0.68 | 5.98  | 3.13  |
| SPBC1685.01   | <i>pmp1</i>   | dual-specificity MAP kinase phosphatase Pmp1                         | dual-specificity MAP kinase phosphatase Pmp1                                       | 0.94 | 1.83  | 2.29  |

|               |                |                                                                                               |                                                        |      |       |       |
|---------------|----------------|-----------------------------------------------------------------------------------------------|--------------------------------------------------------|------|-------|-------|
| SPCC622.03c   |                | dubious                                                                                       | dubious                                                | 1.21 | 4.13  | 3.51  |
| SPBC577.05c   | <i>rec27</i>   | meiotic recombination protein Rec27                                                           |                                                        | 0.57 | 1.67  | 5.42  |
| SPBC365.02c   | <i>cox10</i>   | protoheme IX farnesyltransferase                                                              |                                                        | 1.03 | 2.47  | 1.60  |
| SPAC19G12.04  |                | ureidoglycolate hydrolase (predicted)                                                         | ureidoglycolate hydrolase (predicted)                  | 1.00 | 9.40  | 1.96  |
| SPBC3B9.06c   | <i>apg3</i>    | autophagy associated protein Apg3 (predicted)                                                 | autophagy associated protein Apg3 (predicted)          | 1.06 | 3.85  | 2.38  |
| SPBC16A3.09c  | <i>ufd1</i>    | Cdc48-Ufd1-Npl4 complex component Ufd1 (predicted)                                            |                                                        | 0.70 | 1.79  | 1.85  |
| SPCC757.03c   |                | ThiJ domain protein                                                                           | ThiJ domain protein                                    | 0.55 | 18.51 | 10.23 |
| SPBC1198.14c  | <i>fbp1</i>    | fructose-1,6-bisphosphatase Fbp1                                                              |                                                        | 0.62 | 31.86 | 24.82 |
| SPBC1711.02   | <i>matmc_1</i> | mating-type m-specific polypeptide mc                                                         |                                                        | 0.80 | 2.65  | 2.47  |
| SPAC23D3.11   | <i>ayr1</i>    | 1-acyldihydroxyacetone phosphate reductase (predicted)                                        | 1-acyldihydroxyacetone phosphate reductase (predicted) | 0.95 | 5.22  | 3.14  |
| SPCC794.04c   |                | membrane transporter                                                                          | membrane transporter                                   | 0.71 | 13.12 | 17.07 |
| SPCC132.03    |                | sequence orphan                                                                               | sequence orphan                                        | 1.16 | 4.04  | 2.62  |
| SPBC354.11c   |                | dubious                                                                                       | sequence orphan                                        | 1.40 | 2.45  | 2.00  |
| SPBC1683.08   | <i>ght4</i>    | hexose transporter Ght4                                                                       | hexose transporter Ght4 (PMID 10735857)                | 1.42 | 41.18 | 20.06 |
| SPBC800.13    |                | histone H4 variant                                                                            | histone H4 variant                                     | 0.78 | 2.04  | 2.10  |
| SPBC26H8.04c  |                | DEP domain protein                                                                            |                                                        | 1.00 | 2.21  | 2.40  |
| SPCPB16A4.02c |                | conserved fungal protein                                                                      | conserved fungal protein                               | 1.02 | 1.61  | 1.73  |
| SPAC4G8.03c   |                | RNA-binding protein                                                                           | RNA-binding protein                                    | 0.75 | 2.83  | 2.34  |
| SPCC61.05     |                | S. pombe specific multicopy membrane protein family 1                                         | S. pombe specific multicopy membrane protein family 1  | 0.76 | 3.13  | 2.10  |
| SPAC19B12.13  | <i>cox1102</i> | fusion cytochrome c oxidase assembly protein Cox1102, mitochondrial ribosomal protein Rsm2202 |                                                        | 1.06 | 1.88  | 1.51  |
| SPAPJ695.01c  |                | S. pombe specific UPF0321 family protein 3                                                    | S. pombe specific UPF0321 family protein 3             | 0.33 | 7.42  | 11.10 |
| SPBC19F8.04c  |                | nuclease                                                                                      |                                                        | 0.99 | 1.57  | 1.75  |
| SPAC1556.04c  | <i>cdd1</i>    | cytidine deaminase Ccd1                                                                       | cytidine deaminase Pcd1                                | 0.92 | 1.87  | 2.43  |
| SPMIT.06      |                | mitochondrial DNA binding endonuclease                                                        |                                                        | 0.51 | 1.86  | 4.08  |
| SPBC1709.11c  | <i>png2</i>    | ING family homolog Png2                                                                       |                                                        | 0.98 | 3.08  | 2.35  |
| SPBC660.05    |                | conserved fungal protein                                                                      | conserved fungal protein                               | 0.74 | 8.29  | 11.09 |
| SPBC83.03c    | <i>tas3</i>    | RITS complex subunit 3                                                                        |                                                        | 0.95 | 2.09  | 1.58  |
| SPCC1620.08   |                | succinate-CoA ligase (beta subunit)                                                           | succinate-CoA ligase (beta subunit)                    | 0.95 | 2.13  | 1.77  |

|               |               |                                                               |                                                  |      |       |       |
|---------------|---------------|---------------------------------------------------------------|--------------------------------------------------|------|-------|-------|
| SPBP23A10.14c | <i>ell1</i>   | RNA polymerase II transcription elongation factor SpELL       |                                                  | 0.85 | 2.95  | 2.52  |
| SPAC823.16c   | <i>mug179</i> | WD repeat protein Mug179                                      | WD repeat protein Mug179                         | 0.81 | 2.50  | 3.46  |
| SPAC328.07c   |               | heavy metal ion homeostasis protein (predicted)               | heavy metal ion homeostasis protein (predicted)  | 1.14 | 2.35  | 2.13  |
| SPAC19G12.11  | <i>coq9</i>   | ubiquinone biosynthesis protein Coq9 (predicted)              | ubiquinone biosynthesis protein Coq9 (predicted) | 0.90 | 1.79  | 1.84  |
| SPAC139.05    |               | succinate-semialdehyde dehydrogenase (predicted)              | succinate-semialdehyde dehydrogenase (predicted) | 0.78 | 51.13 | 7.67  |
| SPAC2G11.09   |               | DUF221 family protein                                         | DUF221 family protein                            | 0.93 | 2.14  | 1.93  |
| SPBC577.13    | <i>syj2</i>   | inositol-polyphosphate 5-phosphatase (synaptojanin homolog 2) |                                                  | 0.86 | 4.17  | 3.19  |
| SPBC609.01    |               | ribonuclease II (RNB) family                                  |                                                  | 1.07 | 2.53  | 2.65  |
| SPBC2D10.17   | <i>clr1</i>   | cryptic loci regulator Clr1                                   |                                                  | 0.89 | 2.73  | 3.01  |
| SPAC22A12.01c | <i>pso2</i>   | DNA 5' exonuclease (predicted)                                | DNA 5' exonuclease (predicted)                   | 0.81 | 1.56  | 2.24  |
| SPAC18G6.01c  |               | conserved fungal protein                                      | conserved fungal protein                         | 1.16 | 3.51  | 4.45  |
| SPBC12C2.12c  | <i>glo1</i>   | glyoxalase I                                                  |                                                  | 1.09 | 3.02  | 2.42  |
| SPBC4.01      |               | sequence orphan                                               |                                                  | 0.79 | 52.18 | 86.50 |
| SPAC1687.07   |               | conserved fungal protein                                      | conserved fungal protein                         | 1.11 | 3.12  | 2.26  |
| SPBC405.04c   | <i>ypt7</i>   | GTPase Ypt7                                                   |                                                  | 0.94 | 2.12  | 1.89  |
| SPCC330.01c   | <i>rhp16</i>  | Rad16 homolog Rhp16                                           | Rad16 homolog Rhp16                              | 0.93 | 2.22  | 2.14  |
| SPBC1271.01c  | <i>pof13</i>  | F-box protein Pof13                                           | F-box protein Pof13                              | 0.64 | 2.28  | 3.42  |
| SPAC869.07c   | <i>mel1</i>   | alpha-galactosidase                                           | alpha-galactosidase (PMID 15580593)              | 1.13 | 76.27 | 37.51 |
| SPCC576.01c   |               | sulfonate dioxygenase (predicted)                             | sulfonate dioxygenase (predicted)                | 1.00 | 41.89 | 4.37  |
| SPAC959.05c   |               | protein disulfide isomerase (predicted)                       | protein disulfide isomerase (predicted)          | 0.93 | 1.82  | 1.59  |
| SPBC2A9.03    |               | conserved protein (fungal and plant)                          |                                                  | 0.83 | 1.58  | 2.08  |
| SPAPB1A11.03  |               | FMN dependent dehydrogenase                                   | FMN dependent dehydrogenase                      | 0.29 | 12.92 | 3.54  |
| SPBPB21E7.06  |               | pseudogene                                                    | pseudogene                                       | 0.52 | 15.21 | 6.00  |
| SPAC869.01    |               | amidase (predicted)                                           | amidase (predicted)                              | 1.28 | 2.16  | 1.66  |
| SPCC188.07    | <i>ccq1</i>   | telomere maintenance protein                                  | telomere maintenance protein                     | 0.78 | 1.97  | 2.30  |
| SPAC227.03c   |               | mitochondrial NAD+ transporter (predicted)                    | mitochondrial NAD+ transporter                   | 0.65 | 2.33  | 2.09  |
| SPAC3A12.06c  |               | sodium/calcium exchanger (predicted)                          | sodium/calcium exchanger (predicted)             | 0.90 | 1.55  | 1.70  |
| SPAC458.05    | <i>pik3</i>   | phosphatidylinositol 3-kinase Pik3                            | phosphatidylinositol 3-kinase Pik3               | 0.97 | 2.31  | 2.09  |
| SPCC1739.15   | <i>wtf21</i>  | wtf element Wtf21                                             | wtf element Wtf21                                | 1.04 | 4.27  | 4.28  |
| SPAC23D3.13c  |               | guanyl-nucleotide exchange factor (predicted)                 | guanyl-nucleotide exchange factor                | 0.91 | 1.65  | 2.38  |
| SPCP31B10.02  |               | conserved eukaryotic protein                                  | conserved eukaryotic protein                     | 0.96 | 1.88  | 1.73  |

|               |               |                                                       |                                                       |      |       |       |
|---------------|---------------|-------------------------------------------------------|-------------------------------------------------------|------|-------|-------|
| SPCC330.04c   | <i>mug135</i> | DUF1773 family protein 3                              | DUF1773 family protein 3                              | 0.83 | 2.99  | 2.66  |
| SPAC1006.01   | <i>psp3</i>   | serine protease Psp3 (predicted)                      | serine protease Psp3 (predicted)                      | 1.12 | 2.60  | 1.99  |
| SPAC6G10.10c  |               | human hmmtag2 homolog                                 | human hmmtag2 homolog                                 | 0.92 | 1.75  | 2.33  |
| SPAC22E12.06c | <i>gmh3</i>   | alpha-1,2-galactosyltransferase Gmh3                  | alpha-1,2-galactosyltransferase Gmh3                  | 1.00 | 2.22  | 2.36  |
| SPBC16C6.03c  |               | conserved fungal protein                              |                                                       | 0.70 | 2.43  | 2.51  |
| SPCC70.04c    |               | sequence orphan                                       | sequence orphan                                       | 1.45 | 7.94  | 9.02  |
| SPAC23C4.18c  | <i>rad4</i>   | BRCT domain protein Rad4                              | BRCT domain protein Rad4                              | 0.92 | 1.58  | 1.83  |
| SPAC3H5.04    | <i>aar2</i>   | U5 snRNP-associated protein Aar2                      | U5 snRNP-associated protein Aar2                      | 0.81 | 1.55  | 1.78  |
| SPBC1711.11   |               | autophagy associated protein (predicted)              |                                                       | 1.09 | 7.59  | 4.72  |
| SPCC1682.15   | <i>mug122</i> | PX/PXA domain protein                                 | PX/PXA domain protein                                 | 0.83 | 2.11  | 1.90  |
| SPBC646.15c   |               | Pex16 family peroxisome import protein                |                                                       | 0.67 | 1.57  | 1.87  |
| SPBPB2B2.13   |               | galactokinase Gal1 (predicted)                        |                                                       | 0.98 | 6.72  | 4.54  |
| SPBC16A3.18   | <i>cip1</i>   | RNA-binding protein Cip1                              |                                                       | 1.01 | 1.91  | 2.11  |
| SPBC83.01     | <i>ucp8</i>   | UBA/EH/EF hand domain protein Ucp8                    |                                                       | 0.84 | 2.06  | 2.68  |
| SPCC364.02c   | <i>bis1</i>   | stress response protein Bis1                          | stress response protein Bis1                          | 0.93 | 1.97  | 1.52  |
| SPAC1142.08   | <i>fhl1</i>   | fork head transcription factor Fhl1                   |                                                       | 1.15 | 2.02  | 2.02  |
| SPCC126.09    |               | vacuolar membrane zinc transporter (predicted)        | vacuolar membrane zinc transporter (predicted)        | 1.08 | 2.10  | 2.20  |
| SPAC57A10.05c | <i>pof1</i>   | F-box/WD repeat protein protein Pof1                  | F-box protein Pof1                                    | 0.90 | 2.07  | 2.00  |
| SPAC227.14    |               | nicotinamide riboside kinase (predicted)              | nicotinamide riboside kinase                          | 0.98 | 2.32  | 2.13  |
| SPAC19B12.10  | <i>sst2</i>   | human AMSH protein homolog                            | human amsh protein homolog                            | 0.88 | 4.16  | 3.60  |
| SPBC18H10.05  |               | WD repeat protein, human WDR44 family                 |                                                       | 0.90 | 4.86  | 4.08  |
| SPCC1919.03c  |               | AMP-activated protein kinase beta subunit (predicted) | AMP-activated protein kinase beta subunit (predicted) | 0.96 | 2.22  | 2.20  |
| SPBC409.12c   | <i>stn1</i>   | telomere cap complex subunit Stn1                     |                                                       | 0.69 | 2.39  | 3.04  |
| SPBC28E12.06c | <i>lvs1</i>   | beige protein homolog                                 |                                                       | 0.90 | 1.60  | 1.85  |
| SPBC25B2.03   |               | zf-C3HC4 type zinc finger                             |                                                       | 0.85 | 3.12  | 1.81  |
| SPBC1105.10   | <i>rav1</i>   | RAVE complex subunit Rav1 (predicted)                 |                                                       | 1.06 | 2.79  | 2.17  |
| SPAC31G5.07   |               | conjugation protein (predicted)                       | conserved fungal protein                              | 0.89 | 1.52  | 4.45  |
| SPCC18B5.11c  | <i>cds1</i>   | replication checkpoint kinase Cds1                    | replication checkpoint kinase Cds1                    | 0.91 | 2.60  | 2.27  |
| SPAC1952.09c  |               | acetyl-CoA hydrolase                                  | acetyl-CoA hydrolase                                  | 0.80 | 4.02  | 1.89  |
| SPCC757.04    |               | transcription factor (predicted)                      | transcription factor (predicted)                      | 0.79 | 1.67  | 1.76  |
| SPCC320.04c   |               | GTPase Gem1                                           | GTPase Gem1 (PMID 12482879)                           | 0.77 | 1.70  | 1.87  |
| SPBC30D10.09c |               | HVA22/TB2/DP1 family protein                          |                                                       | 1.08 | 2.48  | 1.70  |
| SPBP4H10.17c  |               | carboxyl methyl esterase                              |                                                       | 0.86 | 2.63  | 2.09  |
| SPAC1002.19   | <i>urg1</i>   | GTP cyclohydrolase II (predicted)                     | GTP cyclohydrolase (predicted)                        | 0.38 | 14.73 | 23.25 |
| SPBC11C11.06c |               | sequence orphan                                       |                                                       | 0.77 | 1.95  | 2.12  |

|               |              |                                                                                             |                                                                                             |      |      |      |
|---------------|--------------|---------------------------------------------------------------------------------------------|---------------------------------------------------------------------------------------------|------|------|------|
| SPBC1D7.02c   | <i>scr1</i>  | transcription factor Scr1                                                                   |                                                                                             | 0.89 | 2.09 | 3.56 |
| SPBC216.03    |              | conserved fungal protein                                                                    |                                                                                             | 0.78 | 4.37 | 3.86 |
| SPCC1259.15c  | <i>ubc11</i> | ubiquitin conjugating enzyme E2-C                                                           | ubiquitin conjugating enzyme E2-C (PMID 12724408)                                           | 0.96 | 1.70 | 1.58 |
| SPAPB1A11.01  |              | membrane transporter                                                                        | membrane transporter                                                                        | 1.12 | 2.61 | 1.76 |
| SPCC285.10c   |              | SPRY domain protein                                                                         | SPRY domain protein                                                                         | 0.82 | 5.21 | 3.84 |
| SPBC543.05c   |              | inorganic anion exchanger (predicted)                                                       |                                                                                             | 0.85 | 1.77 | 1.99 |
| SPAC328.04    |              | AAA family ATPase, unknown biological role                                                  | AAA family ATPase, unknown biological role                                                  | 0.79 | 2.66 | 2.36 |
| SPAPB8E5.10   |              | sequence orphan                                                                             | sequence orphan                                                                             | 0.84 | 2.34 | 3.42 |
| SPAC13G7.13c  | <i>msa1</i>  | RNA-binding protein Msa1                                                                    | RNA-binding protein Msa1                                                                    | 0.64 | 2.84 | 3.39 |
| SPACUNK4.10   |              | hydroxyacid dehydrogenase (predicted)                                                       | hydroxyacid dehydrogenase (predicted)                                                       | 1.15 | 2.55 | 1.90 |
| SPAC3G6.09c   | <i>tps2</i>  | trehalose-phosphate synthase Tps2 (predicted)                                               | trehalose-phosphate synthase Tps2 (predicted)                                               | 0.91 | 1.63 | 1.78 |
| SPBPB2B2.06c  |              | phosphoprotein phosphatase (predicted)                                                      |                                                                                             | 1.10 | 8.40 | 8.61 |
| SPBC6B1.05c   |              | ubiquitin-like conjugating enzyme                                                           |                                                                                             | 1.03 | 2.48 | 2.40 |
| SPCC63.04     | <i>mok14</i> | alpha-1,3-glucan synthase Mok14                                                             | alpha-1,3-glucan synthase Mok14                                                             | 0.91 | 1.89 | 1.91 |
| SPAC29A4.11   | <i>rga3</i>  | GTPase activating protein Rga3                                                              | GTPase activating protein Rga3                                                              | 0.73 | 1.91 | 2.83 |
| SPAC167.05    |              | Usp (universal stress protein) family protein, implicated in meiotic chromosome segregation | Usp (universal stress protein) family protein, implicated in meiotic chromosome segregation | 1.02 | 3.74 | 2.59 |
| SPCC320.03    |              | transcription factor (predicted)                                                            | transcription factor (predicted)                                                            | 0.52 | 2.49 | 3.85 |
| SPBC20F10.06  | <i>mad2</i>  | spindle checkpoint protein Mad2                                                             |                                                                                             | 0.91 | 2.16 | 2.15 |
| SPCC1494.03   | <i>arz1</i>  | armadillo repeat containing, Zfs1 target number 1                                           | sequence orphan                                                                             | 0.75 | 2.85 | 2.60 |
| SPAC20G4.05c  |              | UPF0061 family protein                                                                      | UPF0061 family protein                                                                      | 0.72 | 4.20 | 3.20 |
| SPAC9E9.05    |              | sequence orphan                                                                             | sequence orphan                                                                             | 1.16 | 2.67 | 2.68 |
| SPBC36.10     |              | mitochondrial intermembrane space protein sorting protein                                   |                                                                                             | 0.91 | 2.06 | 2.42 |
| SPBC530.05    |              | transcription factor (predicted)                                                            |                                                                                             | 0.74 | 2.07 | 2.51 |
| SPBC15D4.12c  | <i>mug98</i> | sequence orphan                                                                             |                                                                                             | 1.21 | 2.78 | 1.56 |
| SPBC12C2.02c  | <i>ste20</i> | sterility protein Ste20                                                                     |                                                                                             | 0.96 | 1.56 | 1.73 |
| SPAP8A3.05    |              | ski complex interacting GTPase (predicted)                                                  | ski complex subunit Ski7 (predicted)                                                        | 0.98 | 1.57 | 1.53 |
| SPBC16E9.17c  | <i>rem1</i>  | meiosis-specific cyclin Rem1                                                                |                                                                                             | 0.89 | 5.94 | 4.69 |
| SPBC21D10.09c |              | ubiquitin-protein ligase E3 (predicted)                                                     |                                                                                             | 0.97 | 1.85 | 1.74 |
| SPAC922.06    |              | short chain dehydrogenase (predicted)                                                       | short chain dehydrogenase                                                                   | 1.24 | 3.37 | 1.51 |

|               |               |                                                         |                                                         |      |       |       |
|---------------|---------------|---------------------------------------------------------|---------------------------------------------------------|------|-------|-------|
| SPAC5D6.09c   | <i>mug86</i>  | acetate transporter (predicted)                         | acetate transporter (predicted)                         | 0.68 | 5.80  | 7.61  |
| SPAC27D7.13c  | <i>ssm4</i>   | p150-Glued                                              |                                                         | 0.53 | 2.13  | 8.45  |
| SPAC227.15    |               | protein phosphatase regulatory subunit Reg1 (predicted) | protein phosphatase regulatory subunit Reg1 (predicted) | 0.96 | 3.14  | 3.40  |
| SPAC607.08c   |               | DUF726 family protein                                   | DUF726 family protein                                   | 0.93 | 3.19  | 3.25  |
| SPCC1183.05c  | <i>lig4</i>   | DNA ligase Lig4                                         | DNA ligase Lig4                                         | 1.04 | 1.78  | 1.97  |
| SPBC32F12.08c | <i>duo1</i>   | DASH complex subunit Duo1 (predicted)                   |                                                         | 0.76 | 1.85  | 1.58  |
| SPAC4D7.10c   |               | SAGA complex subunit Spt20 (predicted)                  | SAGA complex subunit Spt20 (predicted)                  | 0.68 | 2.15  | 2.33  |
| SPAC27E2.07   | <i>pvg2</i>   | galactose residue biosynthesis protein Pvg2             | galactose residue biosynthesis protein Pvg2             | 1.21 | 1.59  | 2.48  |
| SPAC1F3.09    | <i>mug161</i> | CwfJ family protein                                     | CwfJ family protein                                     | 0.94 | 2.64  | 1.54  |
| SPCC1020.10   | <i>oca2</i>   | serine/threonine protein kinase Oca2 (predicted)        | serine/threonine protein kinase Oca2 (predicted)        | 0.62 | 2.99  | 3.40  |
| SPBP4H10.16c  |               | phosphatase activator (predicted)                       |                                                         | 1.20 | 1.77  | 1.61  |
| SPBC16D10.05  | <i>mok13</i>  | alpha-1,3-glucan synthase Mok13                         |                                                         | 1.35 | 3.19  | 2.10  |
| SPAC25G10.03  | <i>zip1</i>   | transcription factor Zip1                               | transcription factor Zip1                               | 1.08 | 2.55  | 1.96  |
| SPCC757.11c   |               | membrane transporter                                    | membrane transporter                                    | 0.97 | 3.75  | 2.14  |
| SPBC16E9.16c  | <i>lsd90</i>  | Lsd90 protein                                           |                                                         | 0.47 | 22.97 | 33.93 |
| SPAC20G8.10c  |               | beclin family protein                                   |                                                         | 1.06 | 3.25  | 2.12  |
| SPAC22A12.11  | <i>dak1</i>   | dihydroxyacetone kinase Dak1                            | dihydroxyacetone kinase Dak1                            | 0.90 | 2.11  | 2.25  |
| SPBP4H10.07   |               | ubiquitin-protein ligase E3 (predicted)                 |                                                         | 0.99 | 2.29  | 2.50  |
| SPBP35G2.12   |               | nucleoside diphosphate-sugar hydrolase (predicted)      |                                                         | 0.81 | 2.57  | 1.68  |
| SPBC2F12.05c  |               | sterol binding ankyrin repeat protein                   |                                                         | 0.95 | 2.44  | 2.58  |
| SPBC119.07    | <i>ppk19</i>  | serine/threonine protein kinase Ppk19                   |                                                         | 0.90 | 2.69  | 3.15  |
| SPCC584.03c   |               | RanGTP-binding protein (predicted)                      | RanGTP-binding protein (predicted)                      | 1.12 | 1.66  | 1.71  |
| SPBC18A7.01   |               | X-Pro dipeptidase (predicted)                           |                                                         | 1.11 | 5.49  | 3.03  |
| SPAC22H12.05c |               | fasciclin domain protein (3)                            | fasciclin domain protein (3)                            | 0.91 | 2.71  | 2.71  |
| SPAC144.13c   | <i>srw1</i>   | CDK inhibitor Srw1                                      | CDK inhibitor Srw1                                      | 1.38 | 4.10  | 3.33  |
| SPCC285.11    | <i>ucp10</i>  | UBA/UAS domain protein Ucp10                            | UBA/UAS domain protein Ucp10                            | 1.06 | 5.37  | 3.78  |
| SPAC14C4.07   |               | membrane transporter                                    | membrane transporter                                    | 0.95 | 2.15  | 2.38  |
| SPCC965.06    |               | potassium channel subunit (predicted)                   | potassium channel subunit (predicted)                   | 0.92 | 10.30 | 2.46  |
| SPCC70.10     |               | sequence orphan                                         | sequence orphan                                         | 1.44 | 2.98  | 1.65  |
| SPBC428.16c   | <i>rhb1</i>   | Rheb GTPase Rhb1                                        | Rheb GTPase Rhb1                                        | 0.98 | 1.56  | 1.52  |
| SPAC6F12.12   | <i>par2</i>   | protein phosphatase regulatory subunit Par2             | protein phosphatase regulatory subunit Par2             | 0.87 | 1.69  | 2.29  |
| SPAC15F9.01c  |               | sequence orphan                                         | sequence orphan                                         | 0.92 | 2.88  | 5.22  |



|               |               |                                                                                    |                                                                            |      |      |      |
|---------------|---------------|------------------------------------------------------------------------------------|----------------------------------------------------------------------------|------|------|------|
| SPBC947.08c   |               | histone promoter control protein Hpc2 (predicted)                                  |                                                                            | 0.84 | 1.58 | 2.06 |
| SPAC5D6.06c   |               | UDP-GlcNAc transferase associated protein Alg14                                    | UDP-GlcNAc transferase associated protein Alg14                            | 0.91 | 2.40 | 2.82 |
| SPCC63.14     |               | conserved fungal protein                                                           | conserved fungal protein                                                   | 0.66 | 1.98 | 2.58 |
| SPAC25B8.18   |               | mitochondrial electron carrier (predicted)                                         | mitochondrial electron carrier (predicted)                                 | 0.97 | 3.64 | 2.36 |
| SPCC18B5.05c  |               | phosphomethylpyrimidine kinase (predicted)                                         | phosphomethylpyrimidine kinase (predicted)                                 | 1.28 | 3.00 | 2.49 |
| SPAC19A8.05c  | <i>sst4</i>   | sorting receptor for ubiquitinated membrane proteins, ESCRT 0 complex subunit Sst4 | sorting receptor for ubiquitinated membrane proteins (ISS) (PMID 12055639) | 1.29 | 4.29 | 3.25 |
| SPAC6B12.02c  | <i>mus7</i>   | DNA repair protein Mus7/Mms22                                                      | DNA repair protein Mus7                                                    | 0.91 | 1.85 | 1.75 |
| SPCC16A11.04  | <i>snx12</i>  | sorting nexin Snx12 (predicted)                                                    | sorting nexin Snx12 (predicted)                                            | 0.85 | 1.51 | 2.03 |
| SPBC4F6.06    | <i>kin1</i>   | microtubule affinity-regulating kinase Kin1                                        |                                                                            | 0.92 | 2.72 | 2.42 |
| SPAC10F6.04   |               | RCC domain protein Ats1 (predicted)                                                | RCC domain protein Ats1 (predicted)                                        | 0.86 | 2.36 | 2.48 |
| SPAC6B12.08   | <i>mug185</i> | DNAJ domain protein Jjj family                                                     | DNAJ domain protein Jjj family                                             | 0.77 | 4.04 | 3.93 |
| SPCC320.06    |               | sequence orphan                                                                    | sequence orphan                                                            | 1.12 | 2.86 | 1.73 |
| SPAC6C3.08    |               | proteasome regulatory particle, gankyrin (predicted)                               | gankyrin                                                                   | 1.34 | 3.09 | 2.26 |
| SPACUNK12.02c | <i>cmk1</i>   | calcium/calmodulin-dependent protein kinase Cmk1                                   | calcium/calmodulin-dependent protein kinase Cmk1                           | 1.16 | 2.06 | 2.12 |
| SPAC1420.01c  |               | DUF1752 family protein                                                             | DUF1752 family protein                                                     | 0.96 | 1.70 | 1.73 |
| SPAC22F3.09c  | <i>res2</i>   | MBF transcription factor complex subunit Res2                                      | MBF transcription factor complex subunit Res2                              | 1.18 | 1.93 | 1.67 |
| SPBC21B10.02  |               | sequence orphan                                                                    |                                                                            | 0.86 | 1.69 | 1.86 |
| SPAC2F3.08    | <i>sut1</i>   | alpha-glucoside transporter                                                        | alpha-glucoside transporter (PMID 11136464)                                | 0.93 | 4.23 | 3.95 |
| SPAC1142.03c  | <i>swi2</i>   | Swi5 complex subunit Swi2                                                          | Swi5 complex subunit Swi2                                                  | 0.90 | 1.69 | 2.23 |
| SPBC800.02    | <i>whi5</i>   | cell cycle transcriptional repressor Whi5                                          | cell cycle transcriptional repressor Whi5                                  | 1.18 | 1.82 | 1.72 |
| SPBC1711.17   | <i>prp16</i>  | ATP-dependent RNA helicase Prp16                                                   |                                                                            | 0.74 | 1.95 | 2.94 |
| SPBC800.11    |               | inosine-uridine preferring nucleoside hydrolase (predicted)                        | inosine-uridine preferring nucleoside hydrolase (predicted)                | 0.83 | 3.10 | 1.61 |
| SPBC685.03    |               | sequence orphan                                                                    |                                                                            | 1.09 | 2.97 | 3.76 |
| SPBC23G7.16   | <i>ctr6</i>   | vacuolar copper transporter Ctr6                                                   |                                                                            | 1.49 | 4.15 | 2.00 |
| SPAC17A2.06c  | <i>vps8</i>   | WD repeat protein Vps8                                                             | WD repeat protein Vps8                                                     | 0.83 | 1.81 | 2.34 |

|               |              |                                                                                         |                                                                                         |      |       |       |
|---------------|--------------|-----------------------------------------------------------------------------------------|-----------------------------------------------------------------------------------------|------|-------|-------|
| SPBC902.05c   | <i>idh2</i>  | isocitrate dehydrogenase (NAD+) subunit 2                                               | isocitrate dehydrogenase (NAD+) subunit 2                                               | 1.04 | 3.50  | 2.35  |
| SPAPYUK71.03c |              | C2 domain protein                                                                       | C2 domain protein                                                                       | 0.87 | 2.59  | 1.76  |
| SPBC1773.05c  | <i>tms1</i>  | hexitol dehydrogenase (predicted)                                                       | hexitol dehydrogenase (predicted)                                                       | 0.72 | 7.40  | 4.93  |
| SPAC22A12.17c |              | short chain dehydrogenase (predicted)                                                   | short chain dehydrogenase (predicted)                                                   | 1.06 | 28.82 | 2.70  |
| SPAC56E4.02c  | <i>alg13</i> | N-acetylglucosaminyldiphosphodolichol N-acetylglucosaminyltransferase Alg13 (predicted) | N-acetylglucosaminyldiphosphodolichol N-acetylglucosaminyltransferase Alg13 (predicted) | 0.92 | 2.72  | 1.78  |
| SPBC11C11.03  | <i>ndc80</i> | spindle pole body protein Ndc80                                                         |                                                                                         | 0.99 | 1.53  | 1.69  |
| SPAC18B11.05  | <i>gpi18</i> | pig-V (predicted)                                                                       | pig-V                                                                                   | 0.90 | 2.18  | 1.69  |
| SPBC36B7.05c  |              | phosphatidylinositol(3)-phosphate binding protein (predicted)                           |                                                                                         | 0.88 | 3.60  | 3.07  |
| SPAC2E12.05   | <i>wtf1</i>  | wtf element Wtf1, pseudo                                                                |                                                                                         | 0.99 | 2.51  | 3.07  |
| SPBC21B10.12  | <i>rec6</i>  | meiotic recombination protein Rec6                                                      |                                                                                         | 1.04 | 2.14  | 3.53  |
| SPBPB2B2.11   |              | nucleotide-sugar 4,6-dehydratase (predicted)                                            |                                                                                         | 1.03 | 7.21  | 3.52  |
| SPAC4H3.08    |              | short chain dehydrogenase (predicted)                                                   | short chain dehydrogenase (predicted)                                                   | 0.60 | 41.51 | 3.53  |
| SPCPJ732.03   | <i>meu15</i> | sequence orphan                                                                         | sequence orphan                                                                         | 1.20 | 1.75  | 2.61  |
| SPAC1F3.02c   | <i>mkh1</i>  | MEK kinase (MEKK) Mkh1                                                                  | MEK kinase (MEKK) Mkh1 (PMID 9199286)                                                   | 0.97 | 2.94  | 2.69  |
| SPAC869.06c   |              | cation binding protein (predicted)                                                      | cation binding protein (predicted)                                                      | 1.13 | 49.90 | 38.85 |
| SPAC12B10.13  |              | CTLH domain                                                                             | CTLH domain                                                                             | 0.90 | 3.85  | 3.27  |
| SPBC2D10.06   | <i>rep1</i>  | MBF transcription factor complex subunit Rep1                                           |                                                                                         | 0.92 | 2.00  | 3.36  |
| SPAC1782.03   |              | microfibrillar-associated protein family protein                                        | microfibrillar-associated protein family protein                                        | 0.81 | 1.72  | 1.76  |
| SPCC1919.04   |              | sequence orphan                                                                         | sequence orphan                                                                         | 0.96 | 1.93  | 1.80  |
| SPBC19C2.05   | <i>ran1</i>  | serine/threonine protein kinase Ran1                                                    |                                                                                         | 1.18 | 5.38  | 6.88  |
| SPCC338.12    |              | subtilisin related protein (predicted)                                                  | protease inhibitor (predicted)                                                          | 0.74 | 4.42  | 3.95  |
| SPBC12D12.04c | <i>pck2</i>  | protein kinase C (PKC)-like Pck2                                                        |                                                                                         | 0.82 | 1.77  | 1.72  |
| SPCC1223.09   |              | uricase (predicted)                                                                     | uricase (predicted)                                                                     | 0.80 | 22.52 | 9.67  |
| SPCC548.07c   | <i>ght1</i>  | hexose transporter Ght1                                                                 | hexose transporter Ght1 (PMID 10735857)                                                 | 0.83 | 73.22 | 91.65 |
| SPAC1039.05c  | <i>klf1</i>  | conserved fungal protein                                                                | conserved fungal protein                                                                | 1.05 | 2.56  | 1.73  |
| SPAC1834.08   | <i>mak1</i>  | histidine kinase Mak1                                                                   | histidine kinase Mak1                                                                   | 0.86 | 1.57  | 1.56  |
| SPCC1235.14   | <i>ght5</i>  | hexose transporter Ght5                                                                 | hexose transporter Ght5 (PMID 10735857)                                                 | 0.77 | 2.40  | 3.14  |

|              |              |                                                              |                                                                |      |      |      |
|--------------|--------------|--------------------------------------------------------------|----------------------------------------------------------------|------|------|------|
| SPBC530.07c  |              | phosphomethylpyrimidine kinase (predicted)                   |                                                                | 1.38 | 5.19 | 4.45 |
| SPAC25H1.03  | <i>mug66</i> | meiotically upregulated gene Mug66                           | meiotically upregulated gene Mug66                             | 0.72 | 2.19 | 3.08 |
| SPAP7G5.06   |              | amino acid permease, unknown 4                               | amino acid permease, unknown 4                                 | 0.66 | 3.67 | 2.13 |
| SPAC1805.10  |              | sequence orphan                                              | sequence orphan                                                | 1.11 | 2.27 | 1.82 |
| SPBC713.02c  | <i>ubp21</i> | ubiquitin C-terminal hydrolase Ubp21                         |                                                                | 1.00 | 2.36 | 2.01 |
| SPAC11E3.02c |              | C2 domain protein                                            | C2 domain protein                                              | 0.94 | 2.52 | 2.61 |
| SPBC1773.03c |              | aminotransferase class-III, unknown specificity              | aminotransferase class-III (predicted)                         | 0.93 | 5.35 | 2.08 |
| SPBC839.02   |              | arrestin Aly1 related                                        | arrestin Aly1 related                                          | 0.85 | 2.90 | 3.16 |
| SPAC11G7.03  | <i>ldh1</i>  | isocitrate dehydrogenase (NAD+) subunit 1 Idh1               | isocitrate dehydrogenase (NAD+) subunit 1 Idh1 (PMID 10975257) | 1.03 | 3.38 | 2.48 |
| SPAC4F10.02  |              | aminopeptidase (predicted)                                   | aspartyl aminopeptidase (predicted)                            | 0.97 | 2.70 | 2.52 |
| SPAC27F1.05c |              | aminotransferase class-III, unknown specificity              | 4-aminobutyrate transaminase                                   | 0.72 | 4.06 | 5.19 |
| SPAC22H10.02 |              | conserved fungal protein                                     | conserved fungal protein                                       | 1.03 | 2.53 | 2.55 |
| SPAC1D4.02c  |              | human GRASP protein homolog (predicted)                      | human GRASP protein homolog (predicted)                        | 1.01 | 1.83 | 1.68 |
| SPAC1B3.20   |              | sequence orphan                                              | sequence orphan                                                | 1.05 | 2.70 | 1.92 |
| SPCC1322.08  | <i>srk1</i>  | MAPK-activated protein kinase Srk1                           | MAPK-activated protein kinase Srk1                             | 0.77 | 4.81 | 4.03 |
| SPCC962.01   |              | C2 domain protein                                            | C2 domain protein                                              | 0.72 | 2.10 | 2.11 |
| SPAC2C4.07c  |              | ribonuclease II (RNB) family                                 | ribonuclease II (RNB) family                                   | 1.03 | 2.57 | 1.83 |
| SPAC4G8.04   |              | GTPase activating protein (predicted)                        | GTPase activating protein (predicted)                          | 0.88 | 2.96 | 3.23 |
| SPBC26H8.01  | <i>thi2</i>  | thiazole biosynthetic enzyme                                 |                                                                | 0.96 | 2.05 | 1.96 |
| SPAC6C3.04   | <i>cit1</i>  | citrate synthase (predicted)                                 | citrate synthase                                               | 1.15 | 2.22 | 1.65 |
| SPCC1281.04  |              | pyridoxal reductase (predicted)                              | pyridoxal reductase (predicted)                                | 0.72 | 6.42 | 2.43 |
| SPBC21B10.11 | <i>dpm2</i>  | dolichol-phosphate mannosyltransferase subunit 2 (predicted) |                                                                | 0.91 | 2.03 | 2.55 |
| SPBP16F5.03c | <i>tra1</i>  | phosphatidylinositol kinase-related protein Tra1             |                                                                | 0.85 | 1.83 | 2.14 |
| SPAC23C4.12  | <i>hhp2</i>  | serine/threonine protein kinase Hhp2                         | serine/threonine protein kinase Hhp2 (PMID 8026462)            | 1.02 | 1.68 | 1.79 |
| SPBC21.02    |              | TLDc domain protein 2                                        |                                                                | 0.79 | 2.64 | 2.79 |
| SPBC106.13   |              | conserved eukaryotic protein                                 | conserved eukaryotic protein                                   | 1.04 | 5.71 | 4.83 |
| SPCC14G10.04 |              | sequence orphan                                              | sequence orphan                                                | 0.89 | 1.80 | 1.81 |
| SPAC26F1.01  | <i>sec74</i> | guanyl-nucleotide exchange factor Sec74                      |                                                                | 0.73 | 2.32 | 3.28 |
| SPAC19D5.01  | <i>pyp2</i>  | tyrosine phosphatase Pyp2                                    | tyrosine phosphatase Pyp2                                      | 0.48 | 4.69 | 5.15 |

|               |               |                                                                   |                                             |      |       |       |
|---------------|---------------|-------------------------------------------------------------------|---------------------------------------------|------|-------|-------|
| SPCC4F11.02   | <i>ptc1</i>   | protein phosphatase 2C Ptc1                                       | protein phosphatase 2C Ptc1                 | 1.12 | 2.55  | 2.28  |
| SPAC23C11.06c |               | hydrolase (inferred from context)                                 | hydrolase (inferred from context)           | 1.04 | 9.18  | 4.57  |
| SPCC1223.12c  | <i>meu10</i>  | GPI anchored cell surface protein (predicted)                     | conserved fungal family                     | 0.71 | 3.78  | 3.86  |
| SPBC1289.10c  |               | transcription factor (predicted)                                  |                                             | 0.90 | 2.14  | 2.01  |
| SPBC6B1.02    | <i>ppk30</i>  | Ark1/Prk1 family protein kinase Ppk30                             |                                             | 0.78 | 3.38  | 4.61  |
| SPBC211.07c   | <i>ubc8</i>   | ubiquitin conjugating enzyme Ubc8                                 |                                             | 1.14 | 3.39  | 1.99  |
| SPAC3H1.11    | <i>hsr1</i>   | transcription factor Hsr1                                         | transcription factor Hsr1                   | 0.77 | 2.34  | 2.17  |
| SPBC543.03c   | <i>pku80</i>  | Ku domain protein Pku80                                           |                                             | 1.05 | 2.21  | 1.70  |
| SPBC1271.09   |               | glycerophosphodiester transporter                                 | glycerophosphodiester transporter           | 0.99 | 10.11 | 2.27  |
| SPAPJ691.02   |               | yippee-like protein                                               | yippee-like protein                         | 1.19 | 16.23 | 18.77 |
| SPAC977.17    |               | MIP water channel (predicted)                                     | MIP water channel                           | 1.18 | 22.08 | 7.59  |
| SPAC167.06c   | <i>mug143</i> | sequence orphan                                                   | sequence orphan                             | 0.93 | 14.88 | 8.53  |
| SPCC330.02    | <i>rhp7</i>   | Rad7 homolog Rhp7                                                 |                                             | 1.05 | 2.26  | 1.74  |
| SPBP8B7.30c   | <i>thi5</i>   | transcription factor Thi5                                         | transcription factor Thi5                   | 0.85 | 3.00  | 3.37  |
| SPCC10H11.02  | <i>cwf23</i>  | DNAJ domain protein Cwf23                                         |                                             | 0.99 | 1.69  | 2.03  |
| SPCP20C8.03   |               | pseudogene (predicted)                                            |                                             | 0.81 | 4.05  | 1.75  |
| SPAC630.07c   |               | sequence orphan                                                   | sequence orphan                             | 0.97 | 4.04  | 2.52  |
| SPAC1002.20   |               | sequence orphan                                                   | sequence orphan                             | 0.90 | 6.58  | 4.48  |
| SPAC977.16c   | <i>dak2</i>   | dihydroxyacetone kinase Dak2                                      | dihydroxyacetone kinase Dak2 (PMID 9804990) | 1.06 | 12.35 | 8.29  |
| SPCC1494.08c  |               | conserved fungal protein                                          | conserved fungal protein                    | 0.84 | 1.76  | 1.74  |
| SPBC1718.06   | <i>msp1</i>   | mitochondrial GTPase Msp1                                         |                                             | 0.99 | 2.15  | 1.88  |
| SPBC337.06c   | <i>cwf15</i>  | complexed with Cdc5 protein Cwf15                                 |                                             | 0.89 | 1.65  | 1.62  |
| SPCC576.06c   |               | tyrosine-tRNA ligase                                              | tyrosine-tRNA ligase                        | 0.79 | 1.54  | 2.06  |
| SPAC167.07c   |               | ubiquitin-protein ligase E3 (predicted)                           | ubiquitin-protein ligase E3 (predicted)     | 1.02 | 2.42  | 2.32  |
| SPCC4B3.01    |               | thiosulfate sulfurtransferase                                     |                                             | 0.93 | 4.55  | 3.89  |
| SPBC337.16    | <i>cho1</i>   | phosphatidyl-N-methylethanolamine N-methyltransferase (predicted) |                                             | 0.96 | 1.64  | 1.76  |
| SPAC4A8.04    | <i>isp6</i>   | vacuolar serine protease Isp6                                     | vacuolar serine protease Isp6               | 1.13 | 5.54  | 4.51  |
| SPAC4G9.14    |               | mitochondrial Mvp17/PMP22 family protein 2                        | Mvp17/PMP22 family                          | 1.06 | 1.56  | 1.88  |
| SPAC18G6.09c  |               | sequence orphan                                                   | sequence orphan                             | 1.15 | 1.61  | 3.30  |
| SPCC1450.13c  |               | riboflavin synthase                                               | riboflavin synthase (PMID 14690539)         | 1.01 | 7.78  | 2.99  |
| SPAPB1E7.08c  |               | membrane transporter                                              | membrane transporter                        | 0.84 | 4.93  | 3.77  |
| SPAC12B10.01c |               | ubiquitin-protein ligase E3 (predicted)                           | ubiquitin-protein ligase E3 (predicted)     | 0.87 | 2.40  | 2.58  |
| SPBC15D4.11c  |               | sequence orphan                                                   |                                             | 1.17 | 3.50  | 2.08  |
| SPBP4H10.19c  |               | calreticulin/calnexin homolog                                     |                                             | 1.09 | 1.64  | 1.53  |

|               |               |                                                                |                                                                     |      |       |        |
|---------------|---------------|----------------------------------------------------------------|---------------------------------------------------------------------|------|-------|--------|
| SPBC215.13    |               | sequence orphan                                                |                                                                     | 0.94 | 2.42  | 1.97   |
| SPAC17C9.06   | <i>sam50</i>  | SAM complex subunit Sam50 (predicted)                          | SAM complex subunit Sam50 (predicted)                               | 1.16 | 3.03  | 1.77   |
| SPBC1604.01   | <i>mug158</i> | sulfatase modifying factor 1 related                           |                                                                     | 0.93 | 11.04 | 7.76   |
| SPCC777.02    |               | transcription factor (predicted)                               | transcription factor (predicted)                                    | 0.99 | 1.89  | 1.66   |
| SPCC895.08c   |               | conserved fungal protein                                       | conserved fungal protein                                            | 0.88 | 4.60  | 5.06   |
| SPBP8B7.07c   | <i>set6</i>   | histone lysine methyltransferase Set6 (predicted)              |                                                                     | 0.88 | 1.79  | 1.96   |
| SPAC1F7.03    | <i>pkd2</i>   | TRP-like ion channel                                           | TRP-like ion channel (PMID 15537393)                                | 1.03 | 2.64  | 2.07   |
| SPAC1F7.06    |               | ThiJ domain protein                                            | ThiJ domain protein                                                 | 0.23 | 33.27 | 113.60 |
| SPBP19A11.07c |               | human down-regulated in multiple cancers-1 homolog 2           |                                                                     | 0.88 | 2.53  | 2.99   |
| SPCC23B6.01c  |               | oxysterol binding protein (predicted)                          | oxysterol binding protein (predicted)                               | 0.97 | 1.53  | 1.76   |
| SPAPB2B4.07   |               | ubiquitin family protein, human UBTD1 homolog                  | ubiquitin family protein, human UBTD1 homolog                       | 1.08 | 1.71  | 1.91   |
| SPBC19C7.04c  |               | conserved fungal protein                                       |                                                                     | 1.27 | 2.22  | 1.89   |
| SPBC947.10    |               | ubiquitin-protein ligase E3 (predicted)                        |                                                                     | 0.91 | 2.35  | 2.45   |
| SPBC14C8.01c  | <i>cut2</i>   | securin                                                        |                                                                     | 1.31 | 3.25  | 3.12   |
| SPAC2E1P3.02c | <i>amt3</i>   | ammonium transporter Amt3                                      | ammonium transporter Amt3                                           | 0.91 | 1.52  | 2.18   |
| SPBC106.03    |               | DUF1776 family protein                                         | DUF1776 family protein                                              | 1.16 | 2.20  | 1.54   |
| SPAC29E6.05c  |               | peptide methionine sulfoxide reductase (predicted)             | peptide methionine sulfoxide reductase (predicted)                  | 1.01 | 2.36  | 1.64   |
| SPCC622.15c   |               | sequence orphan                                                | sequence orphan                                                     | 0.85 | 1.81  | 2.60   |
| SPBC29B5.01   | <i>atf1</i>   | transcription factor Atf1                                      |                                                                     | 0.91 | 2.54  | 2.59   |
| SPBC11C11.12  |               | pseudogene (predicted)                                         |                                                                     | 0.83 | 1.77  | 2.28   |
| SPBP23A10.04  | <i>apc2</i>   | anaphase-promoting complex subunit Apc2                        |                                                                     | 0.99 | 2.24  | 2.66   |
| SPBP8B7.27    | <i>mug30</i>  | ubiquitin-protein ligase E3                                    |                                                                     | 1.13 | 1.85  | 1.51   |
| SPCC24B10.02c |               | NAD/NADH kinase (predicted)                                    | NAD/NADH kinase                                                     | 0.82 | 2.95  | 2.49   |
| SPAC17G6.08   | <i>pep7</i>   | prevacuole/endosomal FYVE tethering component Pep7 (predicted) | prevacuole/endosomal FYVE tethering component Pep7 (predicted)      | 0.92 | 1.74  | 2.08   |
| SPAC23E2.03c  | <i>ste7</i>   | meiotic suppressor protein Ste7                                | meiotic suppressor protein Ste7                                     | 1.19 | 11.05 | 15.28  |
| SPBC106.10    | <i>pka1</i>   | cAMP-dependent protein kinase catalytic subunit Pka1           | cAMP-dependent protein kinase catalytic subunit Pka1 (PMID 8144551) | 1.02 | 3.67  | 4.13   |
| SPBC27B12.08  |               | AP-1 accessory protein (predicted)                             |                                                                     | 1.09 | 1.80  | 1.65   |
| SPCC16A11.15c |               | sequence orphan                                                | sequence orphan                                                     | 0.81 | 11.14 | 3.76   |
| SPAC4F8.08    | <i>mug114</i> | sequence orphan                                                | sequence orphan                                                     | 0.27 | 18.64 | 30.11  |

|               |               |                                                                    |                                                                  |      |       |      |
|---------------|---------------|--------------------------------------------------------------------|------------------------------------------------------------------|------|-------|------|
| SPAC22A12.08c |               | cardiolipin synthase/ hydrolase fusion protein (predicted)         | cardiolipin synthase (predicted)                                 | 1.07 | 2.66  | 1.86 |
| SPAC12G12.11c |               | DUF544 family protein                                              | DUF544 family protein                                            | 1.08 | 2.69  | 2.41 |
| SPCC790.02    | <i>pep3</i>   | ubiquitin-protein ligase E3 (predicted)                            | ubiquitin-protein ligase E3 (predicted)                          | 0.89 | 1.76  | 1.60 |
| SPCC24B10.03  |               | sequence orphan                                                    | sequence orphan                                                  | 1.18 | 3.90  | 2.15 |
| SPAC1783.07c  | <i>pap1</i>   | transcription factor Caf3                                          | transcription factor Caf3                                        | 0.91 | 1.69  | 1.89 |
| SPAC212.04c   |               | S. pombe specific DUF999 family protein 1                          | S. pombe specific DUF999 family protein 1                        | 0.83 | 1.87  | 1.79 |
| SPAC20G4.02c  | <i>fus1</i>   | formin Fus1                                                        | formin Fus1                                                      | 0.83 | 6.37  | 8.79 |
| SPAC22F8.05   |               | alpha,alpha-trehalose-phosphate synthase (predicted)               | alpha,alpha-trehalose-phosphate synthase (predicted)             | 0.78 | 6.21  | 7.48 |
| SPBC19C2.09   | <i>sre1</i>   | sterol regulatory element binding protein Sre1                     |                                                                  | 0.76 | 1.83  | 3.72 |
| SPAC27D7.11c  |               | But2 family protein                                                | S. pombe specific But2 family protein                            | 0.71 | 4.23  | 2.92 |
| SPCC1322.14c  | <i>vtc4</i>   | vacuolar transporter chaperone (VTC) complex subunit (predicted)   | vacuolar transporter chaperone (VTC) complex subunit (predicted) | 1.02 | 1.50  | 1.65 |
| SPBC609.03    |               | WD repeat protein, human IQWD1 family                              |                                                                  | 0.78 | 2.28  | 3.06 |
| SPCC1919.14c  | <i>bdp1</i>   | transcription factor TFIIIB complex subunit Bdp1 (predicted)       | transcription factor TFIIIB complex subunit Bdp1 (predicted)     | 0.89 | 1.76  | 1.96 |
| SPAC17G6.02c  | <i>tco1</i>   | RTA1-like protein                                                  | RTA1-like protein                                                | 1.10 | 1.90  | 2.14 |
| SPAC19G12.03  | <i>cda1</i>   | chitin deacetylase Cda1                                            | chitin deacetylase Cda1                                          | 0.95 | 5.72  | 2.73 |
| SPBC11C11.01  |               | RNA-binding protein                                                |                                                                  | 0.76 | 1.92  | 2.04 |
| SPAC869.09    |               | conserved fungal protein                                           | conserved fungal protein                                         | 0.84 | 5.63  | 5.26 |
| SPBC1685.05   |               | serine protease (predicted)                                        | serine protease (predicted)                                      | 0.77 | 6.12  | 5.35 |
| SPAC20G8.02   |               | phospholipase (predicted)                                          | phospholipase                                                    | 0.96 | 2.63  | 2.14 |
| SPAC139.03    |               | transcription factor, zf-fungal binuclear cluster type (predicted) | transcription factor (predicted)                                 | 0.93 | 1.97  | 1.61 |
| SPCC1322.05c  |               | leukotriene A-4 hydrolase (predicted)                              | leukotriene A-4 hydrolase (predicted)                            | 0.92 | 2.17  | 1.99 |
| SPAC23A1.18c  | <i>mrp51</i>  | mitochondrial ribosomal protein subunit L51-b (predicted)          | mitochondrial ribosomal protein subunit L51-b (predicted)        | 1.03 | 1.95  | 1.86 |
| SPCC1223.10c  | <i>eaf1</i>   | RNA polymerase II transcription elongation factor SpEAF            | RNA polymerase II transcription elongation factor SpEAF          | 0.78 | 3.07  | 2.81 |
| SPCP31B10.06  | <i>mug190</i> | C2 domain protein                                                  | C2 domain protein Tcb3 (predicted)                               | 1.02 | 15.06 | 8.07 |
| SPBP18G5.03   | <i>toc1</i>   | Tor Complex Tor2 interacting protein 1                             |                                                                  | 0.93 | 1.98  | 1.99 |
| SPBC1706.02c  | <i>wtf2</i>   | wtf element Wtf2, pseudo                                           |                                                                  | 0.98 | 2.48  | 1.93 |
| SPCC1235.08c  | <i>pdh1</i>   | DUF1751 family protein                                             | DUF1751 family protein                                           | 0.95 | 2.83  | 2.10 |
| SPBC2D10.18   | <i>abc1</i>   | ABC1 kinase family protein                                         |                                                                  | 1.24 | 1.91  | 1.53 |

|               |              |                                                                   |                                                        |      |       |       |
|---------------|--------------|-------------------------------------------------------------------|--------------------------------------------------------|------|-------|-------|
| SPAP19A11.05c | <i>mrp7</i>  | mitochondrial ribosomal protein subunit L27                       | mitochondrial ribosomal protein subunit L27            | 0.85 | 2.25  | 1.91  |
| SPAC1006.04c  | <i>mcp3</i>  | sequence orphan                                                   | sequence orphan                                        | 1.14 | 1.77  | 1.88  |
| SPBC21C3.03   |              | ABC1 kinase family protein                                        |                                                        | 1.12 | 3.06  | 1.94  |
| SPBC26H8.05c  |              | serine/threonine protein phosphatase (predicted)                  |                                                        | 0.97 | 1.87  | 1.78  |
| SPBC428.10    |              | sequence orphan                                                   | sequence orphan                                        | 0.79 | 5.28  | 3.25  |
| SPAC1952.13   | <i>ned1</i>  | lipin Ned1                                                        | lipin                                                  | 0.90 | 2.23  | 2.81  |
| SPAC1F5.09c   | <i>shk2</i>  | PAK-related kinase Shk2                                           | PAK-related kinase Shk2 (PMID 9660817) (PMID 9660818)  | 1.27 | 20.72 | 53.30 |
| SPBC32F12.03c | <i>gpx1</i>  | glutathione peroxidase Gpx1                                       |                                                        | 0.86 | 2.75  | 2.92  |
| SPAC17G8.12   |              | sequence orphan                                                   | sequence orphan                                        | 1.10 | 3.17  | 2.37  |
| SPAC644.11c   |              | mitochondrial pyruvate dehydrogenase (lipoamide) kinase           | pyruvate dehydrogenase (lipoamide) kinase              | 0.93 | 1.51  | 1.52  |
| SPCC1753.02c  | <i>git3</i>  | G-protein coupled receptor Git3                                   | G-protein coupled receptor Git3                        | 0.86 | 1.70  | 2.04  |
| SPAC21E11.03c | <i>pcr1</i>  | transcription factor Pcr1                                         | transcription factor Pcr1                              | 0.67 | 1.65  | 2.00  |
| SPCC191.04c   |              | dubious                                                           | dubious                                                | 1.30 | 2.60  | 2.43  |
| SPAC4G8.12c   |              | alpha-1,2-mannosyltransferase (predicted)                         | alpha-1,2-mannosyltransferase (predicted)              | 1.04 | 3.62  | 3.30  |
| SPBC106.09    | <i>cut4</i>  | anaphase-promoting complex subunit Apc1                           | anaphase-promoting complex subunit Apc1                | 0.96 | 1.60  | 1.62  |
| SPAC1F3.10c   |              | 41183 mitochondrial intermediate peptidase Oct1 (predicted)       | mitochondrial intermediate peptidase Oct1 (predicted)  | 0.97 | 3.26  | 2.38  |
| SPBC887.18c   |              | SAGA complex subunit (predicted)                                  |                                                        | 0.89 | 1.66  | 1.72  |
| SPBC2D10.05   | <i>exg3</i>  | glucan 1,3-beta-glucosidase Exg3                                  |                                                        | 0.85 | 4.60  | 2.90  |
| SPCC1919.10c  | <i>myo52</i> | myosin type V                                                     | myosin type V                                          | 0.90 | 1.52  | 1.86  |
| SPBC1198.13c  | <i>tfg2</i>  | transcription factor TFIIIF complex beta subunit Tfg2 (predicted) |                                                        | 0.91 | 2.69  | 2.76  |
| SPAC23H3.04   |              | conserved fungal protein                                          | conserved fungal protein                               | 0.74 | 4.78  | 5.82  |
| SPBC19C7.03   | <i>cyr1</i>  | adenylate cyclase                                                 |                                                        | 0.83 | 2.32  | 2.89  |
| SPAC8C9.03    | <i>cgs1</i>  | cAMP-dependent protein kinase regulatory subunit Cgs1             | cAMP-dependent protein kinase regulatory subunit Cgs1  | 1.41 | 4.15  | 3.31  |
| SPBC3E7.08c   | <i>rad13</i> | DNA repair nuclease Rad13                                         |                                                        | 0.87 | 1.52  | 1.67  |
| SPAC869.08    | <i>pcm2</i>  | protein-L-isoaspartate O-methyltransferase (predicted)            | protein-L-isoaspartate O-methyltransferase (predicted) | 0.59 | 2.55  | 4.62  |
| SPBPJ4664.03  | <i>mfm3</i>  | M-factor precursor Mfm3                                           |                                                        | 1.48 | 8.41  | 2.05  |
| SPCC162.03    |              | short chain dehydrogenase (predicted)                             | short chain dehydrogenase (predicted)                  | 0.95 | 6.85  | 7.05  |
| SPAC20H4.02   |              | conserved fungal protein                                          | conserved fungal protein                               | 0.94 | 2.30  | 1.87  |

|              |               |                                                                       |                                                            |      |       |       |
|--------------|---------------|-----------------------------------------------------------------------|------------------------------------------------------------|------|-------|-------|
| SPAC3A11.05c | <i>kms1</i>   | meiotic spindle pole body protein Kms1                                | meiotic spindle pole body protein Kms1                     | 0.91 | 2.50  | 3.08  |
| SPAC23C4.05c |               | LEA domain protein                                                    | LEA domain protein                                         | 0.91 | 1.95  | 2.13  |
| SPAC186.04c  |               | pseudogene, similar to N-terminal of transmembrane channel            | pseudogene, similar to N-terminal of transmembrane channel | 0.24 | 14.00 | 39.34 |
| SPBC713.08   | <i>tom13</i>  | mitochondrial TOM complex subunit Tom13                               |                                                            | 1.02 | 1.70  | 1.80  |
| SPBC1D7.05   | <i>byr2</i>   | MAP kinase kinase kinase Byr2                                         |                                                            | 0.93 | 2.50  | 2.20  |
| SPCC132.04c  |               | NAD-dependent glutamate dehydrogenase (predicted)                     | NAD-dependent glutamate dehydrogenase (predicted)          | 1.36 | 5.90  | 2.56  |
| SPBC1778.10c | <i>ppk21</i>  | serine/threonine protein kinase Ppk21                                 |                                                            | 0.74 | 1.66  | 1.51  |
| SPAC630.05   | <i>gyp7</i>   | GTPase activating protein Gyp7 (predicted)                            | GTPase activating protein Gyp7 (predicted)                 | 1.24 | 3.14  | 2.92  |
| SPBC660.07   | <i>ntp1</i>   | alpha,alpha-trehalase Ntp1                                            | alpha,alpha-trehalase Ntp1                                 | 0.95 | 2.25  | 1.98  |
| SPAC7D4.09c  |               | steroid dehydrogenase (predicted)                                     | steroid dehydrogenase (predicted)                          | 1.08 | 1.58  | 1.68  |
| SPAC688.04c  | <i>gst3</i>   | glutathione S-transferase Gst3                                        | glutathione S-transferase (PMID 12151111)                  | 1.10 | 4.82  | 3.04  |
| SPCC1672.08c | <i>tfa2</i>   | transcription factor TFIIE beta subunit Tfa2                          | transcription factor TFIIE beta subunit Tfa2               | 0.85 | 1.59  | 1.65  |
| SPBP18G5.02  |               | CDP-diacylglycerol-glycerol-3-phosphate3-phosphatidyltransferase      |                                                            | 1.20 | 3.23  | 2.60  |
| SPAC1039.06  |               | alanine racemase (predicted)                                          | alanine racemase (predicted)                               | 1.09 | 2.34  | 1.65  |
| SPCC757.07c  | <i>ctt1</i>   | catalase                                                              | catalase                                                   | 0.89 | 2.44  | 2.30  |
| SPAC31G5.15  |               | phosphatidylserine decarboxylase (predicted)                          | phosphatidylserine decarboxylase (predicted)               | 0.80 | 1.85  | 1.68  |
| SPCC1919.12c |               | aminopeptidase (predicted)                                            | aminopeptidase (predicted)                                 | 1.01 | 1.82  | 1.83  |
| SPBC1734.08  | <i>hse1</i>   | STAM like protein Hse1                                                |                                                            | 0.96 | 2.63  | 1.95  |
| SPBC31F10.02 |               | thioesterase superfamily protein                                      |                                                            | 1.10 | 2.23  | 1.98  |
| SPAC607.09c  | <i>btn1</i>   | battenin CLN3 family protein                                          | battenin CLN3 family protein                               | 0.92 | 2.01  | 1.93  |
| SPCC16A11.01 |               | plasma membrane protein involved in inositol lipid-mediated signaling | conserved fungal protein                                   | 0.88 | 2.16  | 2.21  |
| SPBC1773.09c | <i>mug184</i> | meiotically upregulated gene Mug184                                   | meiotically upregulated gene Mug184                        | 1.02 | 1.96  | 2.01  |
| SPAC1952.04c |               |                                                                       | dubious                                                    | 1.13 | 2.17  | 2.39  |
| SPAC3A12.08  |               | conserved fungal protein                                              | conserved fungal protein                                   | 1.11 | 4.05  | 2.28  |
| SPCC1235.06  | <i>sif1</i>   | Sad1 interacting factor 1                                             | Sad1 interacting factor 1                                  | 0.86 | 2.25  | 2.15  |
| SPAC17A2.07c |               | sequence orphan                                                       | sequence orphan                                            | 0.78 | 2.39  | 2.40  |
| SPCC188.12   | <i>spn6</i>   | septin Spn6                                                           | septin Spn6                                                | 1.18 | 1.61  | 2.87  |
| SPAC12D12.09 |               |                                                                       |                                                            | 0.73 | 2.39  | 2.92  |



|               |              |                                                              |                                                              |      |       |       |
|---------------|--------------|--------------------------------------------------------------|--------------------------------------------------------------|------|-------|-------|
| SPBC1198.01   |              | glutathione-dependent formaldehyde dehydrogenase (predicted) | glutathione-dependent formaldehyde dehydrogenase (predicted) | 1.15 | 2.81  | 2.37  |
| SPCC191.11    | <i>inv1</i>  | beta-fructofuranosidase                                      | beta-fructofuranosidase                                      | 0.48 | 39.29 | 61.31 |
| SPAC105.01c   |              | potassium ion/proton antiporter                              | potassium ion/proton antiporter                              | 0.91 | 2.08  | 2.00  |
| SPAC4F10.07c  | <i>atg13</i> | autophagy associated protein Atg13 (predicted)               | autophagy associated protein Atg13 (predicted)               | 0.93 | 3.80  | 3.13  |
| SPCC11E10.02c | <i>gpi8</i>  | pig-K                                                        | pig-K                                                        | 0.85 | 1.70  | 1.87  |
| SPBC1105.13c  |              | sequence orphan                                              |                                                              | 1.04 | 1.62  | 1.53  |
| SPAC1782.01   |              | proteasome component                                         | proteasome component                                         | 0.95 | 1.51  | 1.52  |
| SPAC56E4.06c  | <i>ggt2</i>  | gamma-glutamyltranspeptidase Ggt2                            | gamma-glutamyltranspeptidase Ggt2                            | 1.07 | 2.14  | 2.34  |
| SPBC16D10.04c | <i>dna2</i>  | DNA replication endonuclease-helicase Dna2                   |                                                              | 1.22 | 1.53  | 1.92  |
| SPAC11D3.01c  |              | conserved fungal protein                                     | conserved fungal protein                                     | 0.96 | 4.01  | 1.71  |
| SPAC23H3.13c  | <i>gpa2</i>  | heterotrimeric G protein alpha-2 subunit Gpa2                | heterotrimeric G protein alpha-2 subunit Gpa2 (PMID 1340462) | 1.30 | 2.14  | 1.97  |
| SPCC830.02    | <i>wtf24</i> | wtf element Wtf24                                            |                                                              | 0.79 | 3.43  | 4.70  |
| SPAC24B11.05  |              | pyrimidine 5'-nucleotidase (predicted)                       | pyrimidine 5'-nucleotidase (predicted)                       | 0.93 | 6.82  | 2.95  |
| SPCC306.08c   |              | malate dehydrogenase                                         | malate dehydrogenase                                         | 0.98 | 3.31  | 2.74  |
| SPBC1718.01   | <i>pop1</i>  | F-box/WD repeat protein Pop1                                 |                                                              | 1.03 | 3.41  | 3.42  |
| SPBC651.05c   | <i>dot2</i>  | EAP30 family protein Dot2                                    |                                                              | 1.02 | 1.65  | 2.14  |
| SPCC736.05    | <i>wtf7</i>  | wtf element Wtf7                                             | wtf element Wtf7                                             | 1.00 | 1.74  | 2.03  |
| SPCC1450.01c  |              | pseudogene                                                   |                                                              | 1.18 | 2.53  | 1.65  |
| SPCC18.09c    |              | human aprataxin homolog                                      | conserved eukaryotic protein                                 | 1.07 | 5.62  | 2.72  |
| SPAC15A10.06  |              | CPA1 sodium ion/proton antiporter                            | CPA1 sodium ion/proton antiporter                            | 0.92 | 1.71  | 1.67  |
| SPBP8B7.24c   | <i>atg8</i>  | autophagy associated protein Atg8 (predicted)                |                                                              | 1.06 | 3.42  | 2.60  |
| SPBC83.05     |              | mitochondrial RNA-binding protein (predicted)                |                                                              | 0.94 | 3.70  | 2.19  |
| SPAP11E10.02c | <i>mam3</i>  | cell agglutination protein Mam3                              |                                                              | 0.94 | 2.21  | 2.31  |
| SPBC29A10.04  | <i>psm1</i>  | mitotic cohesin complex subunit Psm1                         |                                                              | 0.98 | 1.51  | 1.74  |
| SPAC27D7.08c  |              | DUF890 family protein                                        | DUF890 family protein                                        | 0.82 | 2.11  | 2.14  |
| SPAC6F6.12    |              | autophagy associated protein Atg24 (predicted)               | autophagy associated protein Atg24                           | 1.02 | 2.89  | 2.08  |
| SPBC6B1.09c   | <i>nbs1</i>  | Mre11 complex subunit Nbs1                                   |                                                              | 0.99 | 3.29  | 2.99  |
| SPAC1296.03c  | <i>sxa2</i>  | serine carboxypeptidase Sxa2                                 | serine carboxypeptidase Sxa2                                 | 0.98 | 1.59  | 2.37  |
| SPAC31G5.18c  |              | ubiquitin family, human C1ORF55 related                      | ubiquitin family, human C1ORF55 related                      | 0.96 | 2.48  | 1.86  |
| SPAC6F6.16c   |              | sequence orphan                                              | sequence orphan                                              | 0.79 | 1.70  | 2.03  |

|              |              |                                                  |                                                         |      |       |       |
|--------------|--------------|--------------------------------------------------|---------------------------------------------------------|------|-------|-------|
| SPAC1F7.09c  |              | allantoicase (predicted)                         | allantoicase (predicted)                                | 1.28 | 12.13 | 5.39  |
| SPBC215.10   |              | haloacid dehalogenase-like hydrolase             |                                                         | 1.09 | 2.56  | 2.87  |
| SPBC13E7.10c | <i>brf1</i>  | transcription factor TFIIIB complex subunit Brf1 |                                                         | 0.98 | 1.75  | 2.09  |
| SPBC1773.13  |              | aromatic aminotransferase (predicted)            | aromatic aminotransferase (predicted)                   | 1.15 | 1.95  | 1.64  |
| SPAC17G6.03  |              | phosphoprotein phosphatase (predicted)           | phosphoprotein phosphatase                              | 0.76 | 13.26 | 2.70  |
| SPCC1223.03c | <i>gut2</i>  | glycerol-3-phosphate dehydrogenase Gut2          | glycerol-3-phosphate dehydrogenase Gut2                 | 0.54 | 3.47  | 4.90  |
| SPCC970.09   | <i>sec8</i>  | exocyst complex subunit Sec8                     | exocyst complex subunit Sec8                            | 0.96 | 1.76  | 2.11  |
| SPAC23C4.13  | <i>bet1</i>  | SNARE Bet1                                       | SNARE Bet1                                              | 0.95 | 1.57  | 1.92  |
| SPAC688.03c  |              | human AMMECR1 homolog                            | human AMMECR1 homolog                                   | 0.74 | 12.46 | 10.25 |
| SPAC1751.01c | <i>gti1</i>  | gluconate transporter inducer Gti1               | gluconate transporter inducer Gti1                      | 0.91 | 9.66  | 12.06 |
| SPMIT.01     | <i>cox1</i>  | cytochrome c oxidase 1                           | cytochrome c oxidase 1; similar to S. cerevisiae Q0045  | 0.81 | 2.05  | 3.78  |
| SPAC959.09c  | <i>apc5</i>  | anaphase-promoting complex subunit Apc5          | anaphase-promoting complex subunit Apc5 (PMID 12477395) | 0.93 | 1.65  | 1.84  |
| SPBC1539.02  |              | sequence orphan                                  |                                                         | 1.07 | 2.59  | 1.66  |
| SPBC1773.02c |              | thioredoxin peroxidase                           | thioredoxin peroxidase                                  | 1.00 | 6.80  | 4.02  |
| SPCC306.06c  |              | ER membrane protein, BIG1 family (predicted)     | ER membrane protein, BIG1 family (predicted)            | 1.02 | 1.69  | 1.80  |
| SPBC31E1.01c | <i>atg2</i>  | autophagy associated protein Mug36               | autophagy associated protein Mug36                      | 0.85 | 2.28  | 2.43  |
| SPCC1620.14c | <i>snf22</i> | ATP-dependent DNA helicase Snf22                 | ATP-dependent DNA helicase Snf22                        | 0.85 | 1.58  | 2.02  |
