# Supplementary material for: The Fission Yeast GATA Factor, Gaf1, Modulates Sexual Development via Direct Down-Regulation of ste11+ Expression in Response to Nitrogen Starvation
Source: PubMed Central journal article supplement (PMC3416868; doi:10.1371/journal.pone.0042409), 2012-08-10
Supplement: pone.0042409.s008.pdf [file pone.0042409.s008.pdf]

Table S8. List of the genes in Subgroup E

\* 369 genes

| Systematic    | Gene name     | Description (GeneDB)                             | Description (FunCat2)                                         | Expression Ratio          |                        |                              |
|---------------|---------------|--------------------------------------------------|---------------------------------------------------------------|---------------------------|------------------------|------------------------------|
|               |               |                                                  |                                                               | (gaf1Δ, +N)<br>/ (WT, +N) | (WT, -N)<br>/ (WT, +N) | (gaf1Δ, -N)<br>/ (gaf1Δ, +N) |
| SPMIT.09      | <i>atp8</i>   | F0-ATPase subunit 8                              |                                                               | 0.01                      | 0.98                   | 101.37                       |
| SPAC1093.06c  | <i>dhc1</i>   | dynein heavy chain                               |                                                               | 0.30                      | 1.47                   | 15.66                        |
| SPCC1020.01c  | <i>pma2</i>   | P-type proton ATPase Pma2                        |                                                               | 0.43                      | 1.26                   | 10.26                        |
| SPBC29A10.14  | <i>rec8</i>   | meiotic cohesin complex subunit Rec8             |                                                               | 0.33                      | 1.23                   | 6.74                         |
| SPCC1235.13   | <i>ght6</i>   | hexose transporter Ght6                          | hexose transporter Ght6 (PMID 10735857)                       | 0.68                      | 1.32                   | 4.81                         |
| SPAC212.08c   |               | GPI anchored protein (predicted)                 | GPI anchored protein (predicted)                              | 1.04                      | 1.32                   | 4.31                         |
| SPBC1718.02   | <i>hop1</i>   | linear element associated protein Hop1           |                                                               | 0.90                      | 1.17                   | 4.26                         |
| SPBC1348.13   |               | pseudogene                                       | pseudogene                                                    | 0.13                      | 0.06                   | 4.17                         |
| SPBC354.08c   |               | DUF221 family protein                            | DUF221 family protein                                         | 0.36                      | 0.92                   | 4.07                         |
| SPAC5D6.10c   | <i>mug116</i> | sequence orphan                                  | sequence orphan                                               | 0.26                      | 0.67                   | 3.83                         |
| SPAC6C3.07    | <i>mug68</i>  | sequence orphan                                  | sequence orphan                                               | 0.33                      | 1.15                   | 3.39                         |
| SPAPB18E9.04c |               | sequence orphan                                  | sequence orphan                                               | 1.05                      | 0.80                   | 3.36                         |
| SPAC23D3.05c  |               | alcohol dehydrogenase pseudogene                 | alcohol dehydrogenase pseudogene                              | 0.51                      | 0.44                   | 3.30                         |
| SPBC14C8.05c  | <i>meu17</i>  | glucan-alpha-1,4-glucosidase                     |                                                               | 1.39                      | 1.37                   | 3.18                         |
| SPBP8B7.04    | <i>mug45</i>  | sequence orphan                                  |                                                               | 0.74                      | 1.19                   | 3.14                         |
| SPCC1450.16c  |               | triacylglycerol lipase                           | triacylglycerol lipase                                        | 0.67                      | 1.13                   | 3.12                         |
| SPBC1348.09   |               | short chain dehydrogenase (predicted)            |                                                               | 0.94                      | 1.43                   | 3.08                         |
| SPAC1786.04   |               | sequence orphan                                  | sequence orphan                                               | 0.36                      | 0.87                   | 3.06                         |
| SPAC13C5.03   | <i>tht1</i>   | nuclear membrane protein involved in karyogamy   | nuclear membrane protein involved in karyogamy (PMID 9442101) | 1.04                      | 0.62                   | 3.01                         |
| SPAC1786.01c  |               | triacylglycerol lipase                           | triacylglycerol lipase                                        | 0.66                      | 0.89                   | 2.96                         |
| SPBC1685.13   |               | non classical export pathway protein (predicted) | non classical export pathway protein (predicted)              | 0.71                      | 1.43                   | 2.93                         |
| SPBC32H8.11   | <i>mei4</i>   | meiotic forkhead transcription factor Mei4       |                                                               | 0.83                      | 1.24                   | 2.88                         |
| SPBPB8B6.02c  |               | urea transporter (predicted)                     | urea transporter (predicted)                                  | 0.34                      | 0.68                   | 2.88                         |
| SPAC1250.02   | <i>mug95</i>  | sequence orphan                                  | sequence orphan                                               | 0.73                      | 0.21                   | 2.83                         |
| SPCC1902.01   | <i>gaf1</i>   | transcription factor Gaf1                        |                                                               | 0.01                      | 1.45                   | 1.71                         |
| SPBC6B1.03c   |               | Pal1 family protein                              |                                                               | 0.77                      | 1.03                   | 2.77                         |
| SPAC4F8.13c   | <i>rng2</i>   | IQGAP                                            | IQGAP                                                         | 0.76                      | 1.44                   | 2.74                         |
| SPAC13A11.06  |               | pyruvate decarboxylase (predicted)               |                                                               | 1.27                      | 1.14                   | 2.69                         |

|               |               |                                                          |                                                                    |      |      |      |
|---------------|---------------|----------------------------------------------------------|--------------------------------------------------------------------|------|------|------|
| SPBP4G3.02    | <i>pho1</i>   | acid phosphatase Pho1                                    |                                                                    | 1.41 | 1.48 | 2.59 |
| SPCC4E9.01c   | <i>rec11</i>  | meiotic cohesin complex subunit Rec11                    |                                                                    | 0.56 | 1.04 | 2.58 |
| SPBC32H8.13c  | <i>mok12</i>  | alpha-1,3-glucan synthase Mok12                          |                                                                    | 0.76 | 1.24 | 2.56 |
| SPAC22F3.04   | <i>mug62</i>  | AMP binding enzyme (predicted)                           | AMP binding enzyme (predicted)                                     | 0.59 | 0.10 | 2.55 |
| SPCC320.07c   | <i>mde7</i>   | RNA-binding protein Mde7                                 | RNA-binding protein Mde7                                           | 0.34 | 0.95 | 2.45 |
| SPBC16A3.13   | <i>meu7</i>   | alpha-amylase homolog Aah4                               |                                                                    | 1.05 | 0.81 | 2.42 |
| SPAPB2B4.03   | <i>cig2</i>   | cyclin Cig2                                              | cyclin Cig2                                                        | 0.80 | 1.09 | 2.39 |
| SPAC4A8.10    |               | lipase (predicted)                                       | lipase (predicted)                                                 | 0.83 | 1.12 | 2.38 |
| SPCC736.09c   |               | TRAX                                                     | TRAX (PMID 16043634)                                               | 0.51 | 0.95 | 2.37 |
| SPCC338.17c   | <i>rad21</i>  | kleisin                                                  | kleisin                                                            | 0.83 | 1.07 | 2.36 |
| SPAC630.15    | <i>mug177</i> | sequence orphan                                          | sequence orphan                                                    | 0.53 | 0.68 | 2.36 |
| SPAC1687.08   |               | sequence orphan                                          | sequence orphan                                                    | 0.93 | 1.45 | 2.32 |
| SPAC13G6.12c  | <i>chs1</i>   | chitin synthase I                                        |                                                                    | 0.84 | 1.33 | 2.28 |
| SPCC290.04    | <i>ams2</i>   | cell cycle regulated GATA-type transcription factor Ams2 |                                                                    | 1.11 | 1.21 | 2.28 |
| SPCC1259.14c  | <i>meu27</i>  | S. pombe specific UPF0300 family protein 5               | S. pombe specific UPF0300 family protein 5                         | 0.68 | 0.84 | 2.25 |
| SPAC17A5.18c  | <i>rec25</i>  | meiotic recombination protein Rec25                      | meiotic recombination protein Rec25                                | 1.03 | 1.32 | 2.24 |
| SPAC31G5.10   | <i>eta2</i>   | Myb family protein Eta2                                  | Myb family transcriptional regulator Eta2                          | 1.04 | 1.41 | 2.22 |
| SPBC557.05    |               | arrestin                                                 |                                                                    | 0.86 | 0.60 | 2.21 |
| SPAC22A12.02c | <i>mug103</i> | sequence orphan                                          | sequence orphan                                                    | 0.36 | 1.13 | 2.20 |
| SPAC25B8.03   |               | phosphatidylserine decarboxylase                         | phosphatidylserine decarboxylase                                   | 1.24 | 1.21 | 2.19 |
| SPCC74.06     | <i>mak3</i>   | histidine kinase Mak3                                    | histidine kinase Mak3 (PMID 11758939)                              | 0.67 | 1.43 | 2.17 |
| SPAC3C7.06c   | <i>pit1</i>   | serine/threonine protein kinase Pit1                     | serine/threonine protein kinase Pit1                               | 0.93 | 1.44 | 2.17 |
| SPBC354.09c   |               | Tre1 family protein (predicted)                          | Tre1 family protein (predicted)                                    | 0.88 | 1.49 | 2.12 |
| SPAC17A2.10c  |               | sequence orphan                                          | sequence orphan                                                    | 0.74 | 1.29 | 2.11 |
| SPBC336.07    | <i>sfc3</i>   | transcription factor TFIIIC complex subunit Sfc3         |                                                                    | 0.79 | 1.48 | 2.11 |
| SPBC354.05c   | <i>sre2</i>   | membrane-tethered transcription factor (predicted)       | membrane-tethered transcription factor (predicted) (PMID 11790253) | 0.99 | 1.28 | 2.11 |
| SPBC1703.04   | <i>mlh1</i>   | MutL family protein Mlh1 (predicted)                     |                                                                    | 0.77 | 1.14 | 2.10 |
| SPAC27E2.09   | <i>mak2</i>   | histidine kinase Mak2                                    | histidine kinase Mak2 (PMID 11758939)                              | 0.82 | 1.44 | 2.09 |
| SPBC119.04    | <i>mei3</i>   | meiosis inducing protein Mei3                            |                                                                    | 1.12 | 1.33 | 2.08 |
| SPBP4H10.11c  | <i>lcf2</i>   | long-chain-fatty-acid-CoA ligase                         |                                                                    | 0.75 | 1.02 | 2.08 |

|               |             |                                                        |                                                  |      |      |      |
|---------------|-------------|--------------------------------------------------------|--------------------------------------------------|------|------|------|
| SPBC2G2.06c   | <i>apl1</i> | AP-2 adaptor complex subunit Apl1 (predicted)          |                                                  | 0.78 | 1.46 | 2.06 |
| SPAC18G6.10   |             | chromosome segregation protein Heh1 (predicted)        | chromosome segregation protein (predicted)       | 0.80 | 1.29 | 2.06 |
| SPAC7D4.04    | <i>taf1</i> | Taz1 interacting factor 1                              | Taz1 interacting factor 1                        | 0.86 | 1.48 | 2.06 |
| SPBC1E8.02    |             | ubiquitin family protein, unknown                      |                                                  | 0.66 | 1.11 | 2.05 |
| SPAPB1E7.05   | <i>gde1</i> | glycerophosphoryl diester phosphodiesterase Gde1       | glycerophosphoryl diester phosphodiesterase      | 0.84 | 1.33 | 2.05 |
| SPAC56F8.13   |             | dubious                                                | dubious                                          | 0.49 | 0.44 | 2.05 |
| SPBC21.05c    | <i>ral2</i> | Ras guanyl-nucleotide exchange factor Ral2 (predicted) |                                                  | 0.74 | 1.41 | 2.05 |
| SPBC12D12.02c | <i>cdm1</i> | DNA polymerase delta subunit Cdm1                      |                                                  | 1.05 | 0.99 | 2.04 |
| SPAC57A10.02  | <i>cdr2</i> | GIN4 family protein kinase Cdr2                        | GIN4 family protein kinase Cdr2                  | 0.90 | 1.26 | 2.04 |
| SPBC2A9.07c   |             | zf-PARP type zinc finger protein                       |                                                  | 0.89 | 1.03 | 2.03 |
| SPBC3B8.07c   | <i>dsd1</i> | dihydroceramide delta-4 desaturase                     |                                                  | 1.06 | 1.49 | 2.03 |
| SPAC15A10.13  | <i>ppk3</i> | serine/threonine protein kinase Ppk3                   | serine/threonine protein kinase Ppk3             | 0.97 | 1.35 | 2.03 |
| SPBC29A3.08   | <i>pof4</i> | elongin-A, F-box protein Pof4                          |                                                  | 0.86 | 1.19 | 2.00 |
| SPAC1F3.08c   |             | dubious                                                | dubious                                          | 0.57 | 0.20 | 2.00 |
| SPAC2F3.10    |             | GARP complex subunit Vps54 (predicted)                 | GARP complex subunit Vps54 (predicted)           | 0.82 | 1.43 | 1.99 |
| SPAC3H8.06    | <i>aur1</i> | inositol phosphorylceramide synthase (predicted)       | inositol phosphorylceramide synthase (predicted) | 0.94 | 1.08 | 1.99 |
| SPAC24B11.12c |             | P-type ATPase                                          | P-type ATPase (PMID 12707717)                    | 0.81 | 1.47 | 1.99 |
| SPCC4F11.05   |             | dubious                                                | dubious                                          | 0.98 | 0.69 | 1.98 |
| SPAC22E12.11c | <i>set3</i> | histone lysine methyltransferase Set3                  | histone lysine methyltransferase Set3            | 0.92 | 1.30 | 1.98 |
| SPAC13G7.03   |             | up-frameshift suppressor3 family                       | up-frameshift suppressor3 family                 | 0.55 | 0.99 | 1.97 |
| SPBC530.04    | <i>mod5</i> | Tea1 anchoring protein Mod5                            |                                                  | 0.96 | 1.16 | 1.97 |
| SPAC18B11.09c |             | N-acetyltransferase (predicted)                        | N-acetyltransferase (predicted)                  | 0.69 | 1.39 | 1.97 |
| SPAPB1A10.13  |             | sequence orphan                                        | sequence orphan                                  | 0.89 | 1.18 | 1.96 |
| SPCC16C4.01   | <i>sif2</i> | Sad1 interacting factor 2                              |                                                  | 0.57 | 0.98 | 1.96 |
| SPAC56F8.16   | <i>esc1</i> | transcription factor Esc1 (predicted)                  | transcription factor Esc1 (predicted)            | 1.01 | 1.39 | 1.96 |
| SPAC3A11.11c  |             | pyridoxal reductase (predicted)                        | pyridoxal reductase (predicted)                  | 0.88 | 1.41 | 1.96 |
| SPAC8F11.10c  | <i>pvg1</i> | pyruvyltransferase                                     |                                                  | 1.27 | 1.39 | 1.96 |
| SPAC30D11.11  |             | Haemolysin-III family protein                          | Haemolysin-III family protein                    | 0.74 | 0.53 | 1.96 |
| SPCC11E10.03  | <i>mug1</i> | dynactin complex subunit (predicted)                   | dynactin complex subunit (predicted)             | 0.61 | 0.84 | 1.95 |
| SPAPB1A10.08  |             | sequence orphan                                        | sequence orphan                                  | 1.03 | 1.36 | 1.95 |
| SPAC31A2.05c  | <i>mis4</i> | cohesin loading factor Mis4                            | cohesin loading factor Mis4                      | 0.81 | 1.44 | 1.95 |

|               |               |                                                                        |                                                        |      |      |      |
|---------------|---------------|------------------------------------------------------------------------|--------------------------------------------------------|------|------|------|
| SPBC1718.04   |               | glycerol-3-phosphate O-acyltransferase (predicted)                     |                                                        | 0.83 | 1.38 | 1.94 |
| SPAC1687.14c  |               | EF hand family protein, unknown role                                   | EF hand family protein, unknown role                   | 0.96 | 1.43 | 1.94 |
| SPAC1565.01   |               | conserved fungal protein                                               | conserved fungal protein                               | 0.97 | 0.89 | 1.93 |
| SPAC13G7.02c  | <i>ssa1</i>   | heat shock protein Ssa1 (predicted)                                    | heat shock protein Ssa1                                | 0.82 | 1.43 | 1.93 |
| SPBC27B12.11c |               | transcription factor (predicted)                                       |                                                        | 1.21 | 1.25 | 1.93 |
| SPBC3B8.02    | <i>php5</i>   | CCAAT-binding factor complex subunit Php5                              |                                                        | 0.94 | 1.42 | 1.92 |
| SPAC1093.03   |               | inositol polyphosphate phosphatase (predicted)                         | polyphosphoinositide phosphatase (predicted)           | 0.87 | 1.46 | 1.92 |
| SPBC25H2.13c  | <i>cdc20</i>  | DNA polymerase epsilon catalytic subunit a Pol2                        |                                                        | 0.97 | 1.17 | 1.92 |
| SPBC409.09c   | <i>mis13</i>  | kinetochore protein Mis13                                              | kinetochore protein Mis13                              | 0.58 | 1.27 | 1.91 |
| SPMIT.11      | <i>cox2</i>   | cytochrome c oxidase 2                                                 | cytochrome c oxidase 2; similar to S. cerevisiae Q0250 | 0.95 | 1.47 | 1.91 |
| SPBC3H7.05c   |               | sequence orphan                                                        |                                                        | 1.13 | 1.20 | 1.91 |
| SPAC227.11c   |               | sensor for misfolded ER glycoproteins Yos9 (predicted)                 | sensor for misfolded ER glycoproteins Yos9 (predicted) | 0.93 | 1.48 | 1.90 |
| SPAC9E9.12c   | <i>ybt1</i>   | ABC transporter Ybt1                                                   | ABC transporter Ybt1                                   | 0.75 | 1.27 | 1.90 |
| SPAC25G10.09c |               | actin cortical patch component, with EF hand and WH2 motif (predicted) |                                                        | 1.00 | 1.44 | 1.90 |
| SPBC1105.15c  | <i>htd2</i>   | 3-hydroxyacyl-ACP dehydratase Htd2 (predicted)                         |                                                        | 0.84 | 1.34 | 1.89 |
| SPAC10F6.09c  | <i>psm3</i>   | mitotic cohesin complex subunit Psm3                                   | mitotic cohesin complex subunit Psm3                   | 1.24 | 1.16 | 1.89 |
| SPAC1006.03c  |               | human CCDC131 homolog                                                  | human CCDC131 homolog                                  | 0.84 | 1.17 | 1.88 |
| SPBC2D10.13   | <i>est1</i>   | telomerase regulator Est1                                              |                                                        | 0.79 | 0.90 | 1.87 |
| SPAC19G12.01c | <i>cut20</i>  | anaphase-promoting complex subunit Apc4                                | anaphase-promoting complex subunit Apc4                | 0.85 | 1.15 | 1.87 |
| SPAC17A5.04c  | <i>mde10</i>  | spore wall assembly peptidase Mde10                                    | spore wall assembly peptidase Mde10                    | 0.89 | 0.83 | 1.87 |
| SPBC12C2.09c  |               | Haemolysin-III family protein                                          |                                                        | 0.89 | 1.13 | 1.87 |
| SPBC106.20    | <i>exo70</i>  | exocyst complex subunit Exo70 (predicted)                              |                                                        | 0.82 | 1.44 | 1.87 |
| SPAC11E3.08c  | <i>nse6</i>   | Smc5-6 complex non-SMC subunit Nse6                                    | Smc5-6 complex non-SMC subunit Nse6                    | 0.77 | 1.32 | 1.87 |
| SPAC4F10.08   | <i>mug126</i> | sequence orphan                                                        | sequence orphan                                        | 0.65 | 1.29 | 1.86 |
| SPBC25H2.08c  | <i>mrs2</i>   | magnesium ion transporter Mrs2                                         | magnesium ion transporter Mrs2                         | 0.78 | 1.27 | 1.86 |
| SPCC1742.01   |               | sequence orphan                                                        |                                                        | 0.44 | 0.51 | 1.86 |
| SPCC550.08    |               | N-acetyltransferase (predicted)                                        | N-acetyltransferase (predicted)                        | 0.87 | 1.31 | 1.86 |
| SPBC216.07c   | <i>tor2</i>   | phosphatidylinositol kinase Tor2                                       |                                                        | 0.88 | 1.42 | 1.86 |

|               |              |                                                              |                                                        |      |      |      |
|---------------|--------------|--------------------------------------------------------------|--------------------------------------------------------|------|------|------|
| SPBC24C6.08c  |              | vesicle coat protein                                         |                                                        | 0.78 | 1.12 | 1.85 |
| SPBC8E4.02c   |              | sequence orphan                                              |                                                        | 0.72 | 1.35 | 1.85 |
| SPAC11D3.18c  |              | nicotinic acid plasma membrane transporter (predicted)       | nicotinic acid plasma membrane transporter (predicted) | 0.61 | 1.42 | 1.85 |
| SPBC691.03c   | <i>apl3</i>  | AP-2 adaptor complex subunit Alp3 (predicted)                |                                                        | 0.84 | 0.91 | 1.84 |
| SPAC1556.06b  |              |                                                              | sequence orphan                                        | 1.29 | 0.91 | 1.84 |
| SPAC12G12.09  |              | sequence orphan                                              | sequence orphan                                        | 0.82 | 1.40 | 1.84 |
| SPAC19G12.08  |              | fatty acid hydroxylase (predicted)                           | fatty acid hydroxylase (predicted)                     | 0.87 | 0.68 | 1.84 |
| SPBC29A3.14c  | <i>trt1</i>  | telomerase reverse transcriptase 1 protein Trt1              |                                                        | 0.79 | 1.08 | 1.84 |
| SPCC645.06c   | <i>rgf3</i>  | RhoGEF Rgf3                                                  | RhoGEF Rgf3                                            | 0.98 | 1.12 | 1.84 |
| SPBC30D10.10c | <i>tor1</i>  | phosphatidylinositol kinase Tor1                             |                                                        | 0.85 | 1.41 | 1.83 |
| SPCC663.06c   |              | short chain dehydrogenase (predicted)                        | short chain dehydrogenase (predicted)                  | 0.55 | 0.75 | 1.83 |
| SPCC970.06    |              | cargo receptor for soluble proteins (predicted)              | cargo receptor for soluble proteins (predicted)        | 0.94 | 1.49 | 1.83 |
| SPAC12B10.08c |              | mitochondrial tRNA(Ile)-lysine synthetase family (predicted) | tRNA(Ile)-lysine synthetase family                     | 0.98 | 1.33 | 1.83 |
| SPCC970.04c   | <i>mob2</i>  | protein kinase activator Mob2                                | protein kinase activator Mob2                          | 0.91 | 1.15 | 1.82 |
| SPCPJ732.01   | <i>vps5</i>  | retromer complex subunit Vps5                                | retromer complex subunit Vps5                          | 0.83 | 1.48 | 1.82 |
| SPAC589.02c   | <i>med13</i> | mediator complex subunit Srb9                                | mediator complex subunit Srb9                          | 0.93 | 1.21 | 1.81 |
| SPCC550.03c   |              | Ski complex RNA helicase Ski2 (predicted)                    | RNA helicase involved in mRNA catabolism               | 0.83 | 1.44 | 1.81 |
| SPAPYUG7.02c  | <i>sin1</i>  | stress activated MAP kinase interacting protein Sin1         | stress activated MAP kinase interacting protein Sin1   | 0.88 | 1.41 | 1.80 |
| SPBC3D6.10    | <i>apn2</i>  | AP-endonuclease Apn2                                         |                                                        | 0.89 | 1.43 | 1.80 |
| SPCC23B6.03c  | <i>tel1</i>  | ATM checkpoint kinase                                        | ATM checkpoint kinase                                  | 1.06 | 1.50 | 1.80 |
| SPCC320.14    |              | threo-3-hydroxyaspartate ammonia-lyase (predicted)           | threo-3-hydroxyaspartate ammonia-lyase (predicted)     | 0.89 | 1.17 | 1.80 |
| SPAC1565.06c  | <i>spg1</i>  | GTPase Spg1                                                  | GTPase Spg1                                            | 0.96 | 1.30 | 1.80 |
| SPAC1687.02   |              | CAAX prenyl protease (predicted)                             | CAAX prenyl protease (predicted)                       | 1.01 | 1.49 | 1.80 |
| SPAC29B12.08  |              | sequence orphan                                              | sequence orphan                                        | 0.80 | 0.45 | 1.80 |
| SPCC188.10c   |              | pseudo                                                       |                                                        | 1.22 | 0.52 | 1.80 |
| SPAC17H9.20   | <i>psc3</i>  | mitotic cohesin complex, non-SMC subunit Psc3                |                                                        | 1.10 | 1.11 | 1.80 |
| SPAC1250.01   | <i>snf21</i> | ATP-dependent DNA helicase Snf21                             | ATP-dependent DNA helicase Snf21                       | 0.91 | 1.22 | 1.79 |
| SPAC23C11.16  | <i>plo1</i>  | Polo kinase Plo1                                             | Polo kinase Plo1                                       | 0.94 | 1.29 | 1.79 |
| SPBC16G5.09   |              | serine carboxypeptidase (predicted)                          |                                                        | 0.92 | 1.28 | 1.78 |

|               |              |                                                             |                                                   |      |      |      |
|---------------|--------------|-------------------------------------------------------------|---------------------------------------------------|------|------|------|
| SPAC26H5.11   |              | spore wall assembly protein (predicted)                     | spore wall assembly protein (predicted)           | 0.67 | 1.08 | 1.78 |
| SPAC11E3.10   |              | VanZ-like family protein                                    | VanZ-like family protein                          | 0.87 | 1.23 | 1.78 |
| SPBC16A3.10   |              | membrane bound O-acyltransferase, MBOAT (predicted)         |                                                   | 0.86 | 1.40 | 1.78 |
| SPAC23G3.09   | <i>taf4</i>  | transcription factor TFIID complex subunit Taf4 (predicted) | transcription factor TFIID complex subunit Taf4   | 0.75 | 1.36 | 1.77 |
| SPAC57A10.04  | <i>mug10</i> | sequence orphan                                             | sequence orphan                                   | 0.87 | 0.74 | 1.77 |
| SPBC1105.08   |              | EMP70 family                                                |                                                   | 0.82 | 1.17 | 1.76 |
| SPBC4C3.04c   |              | guanyl-nucleotide exchange factor (predicted)               |                                                   | 0.99 | 1.28 | 1.76 |
| SPBC651.03c   | <i>gyp10</i> | GTPase activating protein Gyp10                             |                                                   | 1.04 | 1.48 | 1.76 |
| SPCC16C4.09   | <i>sts5</i>  | RNB-like protein                                            | RNB-like protein                                  | 0.94 | 1.32 | 1.76 |
| SPBC582.04c   |              | sequence orphan                                             | sequence orphan                                   | 0.90 | 1.35 | 1.75 |
| SPAC144.05    |              | ATP-dependent DNA helicase (predicted)                      | ATP-dependent DNA helicase                        | 0.85 | 1.15 | 1.75 |
| SPAC4A8.09c   | <i>cwf21</i> | complexed with Cdc5 protein Cwf21                           | complexed with Cdc5 protein Cwf21 (PMID 11884590) | 0.83 | 0.88 | 1.75 |
| SPAC12B10.03  |              | WD repeat protein, human WDR20 family                       | WD repeat protein, human WDR20 family             | 0.91 | 1.24 | 1.75 |
| SPBC1709.12   | <i>rid1</i>  | GTPase binding protein Rid1                                 |                                                   | 1.02 | 0.69 | 1.75 |
| SPCC4B3.15    | <i>mid1</i>  | medial ring protein Mid1                                    | medial ring protein Mid1                          | 0.88 | 1.42 | 1.75 |
| SPBC8E4.01c   |              | inorganic phosphate transporter (predicted)                 |                                                   | 1.22 | 0.96 | 1.75 |
| SPBC776.10c   | <i>cog6</i>  | Golgi transport complex peripheral subunit Cog6 (predicted) |                                                   | 0.84 | 1.37 | 1.74 |
| SPAC3C7.09    | <i>set8</i>  | lysine methyltransferase Set8 (predicted)                   | lysine methyltransferase Set8 (predicted)         | 0.78 | 1.30 | 1.74 |
| SPCC777.11    |              | sequence orphan                                             | sequence orphan                                   | 0.78 | 0.92 | 1.74 |
| SPCC417.02    | <i>dad5</i>  | DASH complex subunit Dad5                                   | DASH complex subunit Dad5                         | 0.49 | 0.11 | 1.74 |
| SPCC126.07c   |              | human CTD-binding SR-like protein rA9 homolog               | ubiquitin-protein ligase E3 (predicted)           | 0.73 | 1.21 | 1.73 |
| SPAC22E12.14c | <i>sck2</i>  | serine/threonine protein kinase Sck2                        | serine/threonine protein kinase Sck2              | 0.76 | 0.89 | 1.73 |
| SPBC27B12.12c |              | CorA family magnesium ion transporter (predicted)           |                                                   | 0.86 | 1.42 | 1.73 |
| SPCC548.05c   |              | ubiquitin-protein ligase E3 (predicted)                     | ubiquitin-protein ligase E3 (predicted)           | 0.78 | 1.30 | 1.73 |
| SPCC132.05c   |              | trichothecene 3-O-acetyltransferase pseudogene              |                                                   | 1.31 | 1.16 | 1.73 |

|               |               |                                                        |                                                                     |      |      |      |
|---------------|---------------|--------------------------------------------------------|---------------------------------------------------------------------|------|------|------|
| SPBC660.13c   | <i>ssb1</i>   | DNA replication factor A subunit Ssb1                  | DNA replication factor A subunit Ssb1 (PMID 9111307) (PMID 8702843) | 0.96 | 1.13 | 1.73 |
| SPCC18.01c    | <i>adg3</i>   | beta-glucosidase Adg3 (predicted)                      | beta-glucosidase Adg3 (predicted)                                   | 1.23 | 0.89 | 1.72 |
| SPAC17D4.03c  | <i>cis4</i>   | cation diffusion family zinc membrane transporter Cis4 | membrane transporter (predicted)                                    | 0.88 | 1.36 | 1.72 |
| SPAC2G11.14   | <i>taf111</i> | transcription factor TFIID complex subunit Taf111      | transcription factor TFIID complex subunit Taf111                   | 0.79 | 1.35 | 1.72 |
| SPBC21H7.03c  |               | acid phosphatase (predicted)                           |                                                                     | 0.82 | 1.28 | 1.72 |
| SPAC23C4.11   | <i>atp18</i>  | F0-ATPase subunit J (predicted)                        | F-0 ATPase subunit J (predicted)                                    | 0.76 | 1.47 | 1.72 |
| SPAC343.12    | <i>rds1</i>   | conserved fungal protein                               | conserved fungal protein                                            | 0.71 | 1.30 | 1.72 |
| SPAC926.03    | <i>rlc1</i>   | myosin II regulatory light chain                       | myosin II regulatory light chain (PMID 11056543)                    | 0.86 | 1.46 | 1.72 |
| SPAC19G12.07c | <i>rsd1</i>   | RNA-binding protein Rsd1                               | RNA-binding protein Rsd1                                            | 1.15 | 0.91 | 1.72 |
| SPAC343.19    |               | phosphatidylinositol 4-kinase Lsb6 (predicted)         |                                                                     | 0.94 | 1.49 | 1.71 |
| SPBC23G7.08c  | <i>rga7</i>   | GTPase activating protein Rga7                         |                                                                     | 0.85 | 0.97 | 1.71 |
| SPBC17F3.01c  | <i>rga5</i>   | GTPase activating protein Rga5                         |                                                                     | 1.31 | 1.38 | 1.71 |
| SPAC630.09c   | <i>mug58</i>  | glycerate kinase (predicted)                           | glycerate kinase (predicted)                                        | 0.80 | 1.16 | 1.71 |
| SPBC3D6.13c   |               | protein disulfide isomerase (predicted)                |                                                                     | 0.91 | 1.43 | 1.71 |
| SPAC1296.01c  |               | phosphoacetylglucosamine mutase (predicted)            | phosphoacetylglucosamine mutase (predicted)                         | 0.89 | 1.46 | 1.71 |
| SPAC29B12.07  | <i>sec16</i>  | multidomain vesicle coat component Sec16               | multidomain vesicle coat component Sec16                            | 0.82 | 1.46 | 1.71 |
| SPAC12G12.03  | <i>cip2</i>   | RNA-binding protein Cip2                               | RNA-binding protein Cip2                                            | 1.03 | 1.24 | 1.71 |
| SPAC9G1.07    |               | sequence orphan                                        | sequence orphan                                                     | 0.90 | 1.36 | 1.71 |
| SPCC4E9.02    | <i>cig1</i>   | cyclin Cig1                                            |                                                                     | 0.88 | 0.65 | 1.71 |
| SPAC1A6.08c   | <i>mug125</i> | sequence orphan                                        | sequence orphan                                                     | 0.83 | 0.66 | 1.71 |
| SPBP23A10.13  | <i>orc4</i>   | origin recognition complex subunit Orc4                |                                                                     | 0.85 | 1.36 | 1.70 |
| SPCC1494.10   |               | transcription factor (predicted)                       |                                                                     | 0.91 | 1.18 | 1.70 |
| SPAC3A12.17c  | <i>cys12</i>  | cysteine synthase Cys12                                | cysteine synthase Cys12                                             | 1.02 | 1.16 | 1.70 |
| SPCC1183.01   | <i>sec15</i>  | exocyst complex subunit Sec15 (predicted)              | exocyst complex subunit Sec15 (predicted)                           | 0.78 | 0.99 | 1.70 |
| SPAC821.13c   |               | P-type ATPase                                          |                                                                     | 1.07 | 1.30 | 1.70 |
| SPAC5H10.01   |               | DUF1445 family protein                                 | DUF1445 family protein                                              | 0.87 | 1.14 | 1.70 |
| SPAC688.10    | <i>rev3</i>   | DNA polymerase zeta catalytic subunit Rev3             | DNA polymerase zeta catalytic subunit Rev3                          | 0.79 | 1.47 | 1.70 |
| SPBC1347.10   | <i>cdc23</i>  | MCM-associated protein Mcm10                           |                                                                     | 0.89 | 1.47 | 1.70 |

|               |                 |                                               |                                                     |      |      |      |
|---------------|-----------------|-----------------------------------------------|-----------------------------------------------------|------|------|------|
| SPAC3G9.12    | <i>peg1</i>     | CLASP family microtubule-associated protein   | CLASP family microtubule-associated protein         | 0.88 | 1.14 | 1.69 |
| SPAC22F3.02   | <i>atf31</i>    | transcription factor Atf31                    | transcription factor Atf31                          | 1.22 | 1.35 | 1.69 |
| SPAC6F6.13c   |                 | DUF726 family protein                         | DUF726 family protein                               | 0.97 | 1.25 | 1.69 |
| SPBC23E6.02   |                 | ATP-dependent DNA helicase (predicted)        |                                                     | 0.80 | 1.35 | 1.69 |
| SPAC29B12.01  | <i>ino80</i>    | SNF2 family helicase Ino80                    | SNF2 family helicase Ino80                          | 0.83 | 1.43 | 1.69 |
| SPBC32F12.07c |                 | ubiquitin-protein ligase E3 (predicted)       |                                                     | 0.86 | 1.43 | 1.69 |
| SPCC970.08    |                 | inositol polyphosphate kinase (predicted)     | inositol polyphosphate kinase (predicted)           | 0.84 | 1.14 | 1.69 |
| SPAC26A3.09c  | <i>rga2</i>     | GTPase activating protein Rga2                | GTPase activating protein Rga2                      | 0.97 | 1.20 | 1.68 |
| SPAC1639.02c  | <i>trk2</i>     | potassium ion transporter Trk2                |                                                     | 0.98 | 1.18 | 1.68 |
| SPCC1620.13   |                 | phosphoglycerate mutase family                | phosphoglycerate mutase family                      | 0.93 | 1.14 | 1.68 |
| SPCC550.12    | <i>arp6</i>     | actin-like protein Arp6                       | actin-like protein Arp6                             | 0.78 | 0.98 | 1.68 |
| SPBC29A3.17   | <i>gef3</i>     | RhoGEF Gef3                                   |                                                     | 0.76 | 0.96 | 1.68 |
| SPBC3B8.04c   |                 | membrane transporter                          |                                                     | 1.01 | 1.33 | 1.68 |
| SPBC317.01    | <i>mbx2</i>     | MADS-box transcription factor Pvg4            |                                                     | 0.39 | 1.16 | 1.67 |
| SPCC417.03    |                 | sequence orphan                               | sequence orphan                                     | 0.73 | 0.82 | 1.67 |
| SPBC1826.01c  | <i>mot1</i>     | TATA-binding protein associated factor Mot1   | TATA-binding protein associated factor Mot1         | 0.88 | 1.20 | 1.67 |
| SPCC338.08    | <i>ctp1</i>     | CtIP-related endonuclease                     | sequence orphan                                     | 0.94 | 1.19 | 1.67 |
| SPAC16A10.03c |                 | zinc finger protein Pep5/Vps11 (predicted)    | zinc finger protein Pep5/Vps11 (predicted)          | 1.02 | 1.43 | 1.66 |
| SPBC28F2.12   | <i>rpb1</i>     | DNA-directed RNA polymerase II large subunit  |                                                     | 0.79 | 0.96 | 1.66 |
| SPBC428.20c   | <i>alp6</i>     | gamma tubulin complex Spc98/GCP3 subunit Alp6 |                                                     | 0.95 | 1.12 | 1.66 |
| SPAC6C3.06c   |                 | P-type ATPase, calcium transporting           | P-type ATPase, calcium transporting (PMID 12707717) | 0.92 | 1.34 | 1.65 |
| SPBC29A3.01   |                 | heavy metal ATPase                            |                                                     | 0.97 | 1.45 | 1.65 |
| SPBC649.05    | <i>cut12</i>    | spindle pole body protein Cut12               | spindle pole body protein Cut12 (PMID 9531532)      | 0.96 | 1.37 | 1.65 |
| SPAC1A6.07    |                 | sequence orphan                               | sequence orphan                                     | 0.82 | 1.46 | 1.65 |
| SPAC4G9.05    | <i>mpf1</i>     | meiotic PUF family protein 1                  | meiotic PUF family protein 1                        | 0.67 | 0.84 | 1.65 |
| SPAC27E2.01   |                 | alpha-amylase homolog (predicted)             | alpha-amylase homolog (predicted)                   | 0.86 | 1.46 | 1.65 |
| SPAC17A5.05c  |                 | conserved fungal protein                      | conserved fungal protein                            | 0.67 | 0.78 | 1.65 |
| SPAC14C4.04   | <i>B22918-2</i> | hypothetical protein                          | hypothetical protein                                | 0.88 | 1.42 | 1.65 |



|               |               |                                                                    |                                                       |      |      |      |
|---------------|---------------|--------------------------------------------------------------------|-------------------------------------------------------|------|------|------|
| SPBC26H8.02c  | <i>sec9</i>   | SNAP-25 homologue, t-SNARE component Sec9                          |                                                       | 0.85 | 1.01 | 1.65 |
| SPAC1952.10c  |               | conserved fungal protein                                           | conserved fungal protein (predicted)                  | 0.89 | 1.26 | 1.64 |
| SPBC342.05    | <i>crb2</i>   | DNA repair protein RAD9 homolog, Rhp9                              |                                                       | 0.89 | 1.40 | 1.64 |
| SPAC1783.02c  | <i>vps66</i>  | acyltransferase (predicted)                                        | acyltransferase (predicted)                           | 0.95 | 1.33 | 1.64 |
| SPBC16A3.19   |               | histone acetyltransferase complex subunit Eaf7 (predicted)         |                                                       | 0.72 | 1.08 | 1.64 |
| SPAPB2C8.01   |               | glycoprotein (predicted)                                           | glycoprotein (predicted)                              | 0.84 | 1.31 | 1.64 |
| SPAC22H10.03c | <i>kap114</i> | karyopherin Kap14                                                  | karyopherin Kap14                                     | 0.87 | 1.49 | 1.64 |
| SPBP26C9.03c  | <i>fet4</i>   | iron/zinc ion transporter (predicted)                              | iron ion transporter (predicted)                      | 0.88 | 1.46 | 1.63 |
| SPBC21B10.13c |               | transcription factor, homeobox type (predicted)                    |                                                       | 0.86 | 0.96 | 1.63 |
| SPAC2F3.14c   |               | conserved fungal protein                                           | conserved fungal protein                              | 0.70 | 0.91 | 1.63 |
| SPAC30D11.09  | <i>cwf19</i>  | complexed with Cdc5 protein Cwf19                                  | complexed with Cdc5 protein Cwf19 (PMID 11884590)     | 0.84 | 0.84 | 1.63 |
| SPCC1183.04c  | <i>pet127</i> | mitochondrial membrane protein Pet127                              | mitochondrial membrane protein Pet127                 | 0.88 | 1.15 | 1.63 |
| SPAC57A7.11   | <i>mip1</i>   | WD repeat protein Mip1                                             | WD repeat protein Mip1                                | 0.72 | 1.08 | 1.63 |
| SPCC622.10c   |               | exocyst complex subunit Sec5 (predicted)                           | exocyst complex subunit Sec5 (predicted)              | 0.78 | 1.05 | 1.63 |
| SPAC222.11    | <i>hem13</i>  | coproporphyrinogen III oxidase (predicted)                         | coproporphyrinogen III oxidase (predicted)            | 0.72 | 0.42 | 1.62 |
| SPBC1921.06c  | <i>pvg3</i>   | beta-1,3-galactosyltransferase                                     |                                                       | 1.03 | 1.46 | 1.62 |
| SPAC1327.01c  |               | transcription factor, zf-fungal binuclear cluster type (predicted) | transcription factor (predicted)                      | 1.03 | 1.28 | 1.62 |
| SPCC736.04c   | <i>gma12</i>  | alpha-1,2-galactosyltransferase Gma12                              | alpha-1,2-galactosyltransferase Gma12 (PMID 95003210) | 0.76 | 0.93 | 1.62 |
| SPCC1919.02   |               | pig-X                                                              | pig-X                                                 | 1.07 | 1.48 | 1.62 |
| SPBC31F10.13c | <i>hip1</i>   | hira protein Hip1                                                  |                                                       | 0.82 | 1.44 | 1.62 |
| SPBC25B2.11   | <i>pof2</i>   | F-box protein Pof2                                                 |                                                       | 0.85 | 1.38 | 1.62 |
| SPCC1620.07c  |               | lunapark homolog                                                   | lunapark homolog                                      | 1.21 | 1.46 | 1.62 |
| SPAC110.01    | <i>ppk1</i>   | serine/threonine protein kinase Ppk1 (predicted)                   | serine/threonine protein kinase Ppk1 (predicted)      | 0.99 | 1.46 | 1.62 |
| SPBC215.01    |               | GTPase activating protein                                          |                                                       | 0.70 | 1.25 | 1.62 |
| SPMIT.10      | <i>atp9</i>   | F0-ATPase subunit 9                                                | F0-ATPase subunit 9; similar to S. cerevisiae Q0130   | 0.53 | 0.84 | 1.61 |
| SPBC18E5.14c  |               | sequence orphan                                                    |                                                       | 0.86 | 1.20 | 1.61 |
| SPAC26H5.05   |               | IPT/TIG ankyrin repeat protein                                     | IPT/TIG ankyrin repeat protein                        | 0.90 | 1.31 | 1.61 |
| SPCC4G3.07c   | <i>phf1</i>   | PHD finger containing protein Phf1                                 | PHD finger containing protein Phf1                    | 0.91 | 1.22 | 1.61 |

|              |              |                                                                    |                                                                         |      |      |      |
|--------------|--------------|--------------------------------------------------------------------|-------------------------------------------------------------------------|------|------|------|
| SPAC823.05c  | <i>tlg2</i>  | SNARE Tlg2 (predicted)                                             | SNARE Tlg2                                                              | 0.84 | 1.24 | 1.61 |
| SPBC2D10.04  |              | arrestin Aly1 related                                              |                                                                         | 0.87 | 1.25 | 1.61 |
| SPAC30D11.13 | <i>hus5</i>  | SUMO conjugating enzyme Hus5                                       | SUMO conjugating enzyme Hus5                                            | 0.86 | 1.11 | 1.61 |
| SPAC1687.15  | <i>gsk3</i>  | serine/threonine protein kinase Gsk3                               | serine/threonine protein kinase Gsk3                                    | 0.90 | 1.38 | 1.61 |
| SPAC12G12.15 | <i>sif3</i>  | Sad1 interacting factor 3                                          | Sad1 interacting factor 3                                               | 0.88 | 1.44 | 1.61 |
| SPBC2F12.08c | <i>ceg1</i>  | mRNA guanylyltransferase Ceg1                                      |                                                                         | 0.84 | 1.25 | 1.61 |
| SPAC15E1.04  |              | thymidylate synthase (predicted)                                   | thymidylate synthase (predicted)                                        | 0.88 | 1.40 | 1.61 |
| SPBC1198.10c |              | asparagine-tRNA ligase Slm5                                        | asparagine-tRNA ligase Slm5                                             | 0.90 | 1.26 | 1.61 |
| SPAC1296.05c |              | cyclin L family cyclin                                             | cyclin L family cyclin                                                  | 0.87 | 0.91 | 1.61 |
| SPAC1556.08c | <i>cbs2</i>  | protein kinase activator (predicted)                               |                                                                         | 0.91 | 1.37 | 1.61 |
| SPAC57A7.13  |              | RNA-binding protein                                                | RNA-binding protein                                                     | 0.94 | 1.47 | 1.60 |
| SPBC19C7.02  | <i>ubr1</i>  | N-end-recognizing protein Ubr1                                     |                                                                         | 0.77 | 1.28 | 1.60 |
| SPBC11B10.06 | <i>sws1</i>  | SWIM domain containing-Srs2 interacting protein 1                  |                                                                         | 1.00 | 1.25 | 1.60 |
| SPAC3H1.12c  | <i>snt2</i>  | Lid2 complex subunit Snt2                                          | Lid2 complex subunit Snt2 (PMID 12488447)                               | 0.91 | 1.15 | 1.60 |
| SPBC21C3.19  |              | DUF1960 family protein                                             |                                                                         | 0.66 | 1.41 | 1.60 |
| SPBC19C7.11  |              | CIC chloride channel (predicted)                                   |                                                                         | 0.87 | 1.41 | 1.60 |
| SPBC428.08c  | <i>clr4</i>  | histone H3 methyltransferase Clr4                                  | histone H3 methyltransferase Clr4                                       | 0.88 | 1.41 | 1.60 |
| SPCC162.07   | <i>ent1</i>  | epsin                                                              | epsin                                                                   | 0.91 | 1.33 | 1.59 |
| SPAC3H5.09c  |              | conserved fungal protein                                           | conserved fungal protein                                                | 0.74 | 1.15 | 1.59 |
| SPBC3E7.12c  | <i>chr1</i>  | chitin synthase regulatory factor (putative)<br>Chr1               |                                                                         | 1.01 | 0.97 | 1.59 |
| SPBC685.02   |              | conserved eukaryotic protein                                       |                                                                         | 1.08 | 1.43 | 1.59 |
| SPBC15D4.08c |              | dubious                                                            |                                                                         | 0.61 | 0.93 | 1.59 |
| SPCP1E11.05c |              | sterol O-acyltransferase (predicted)                               | sterol O-acyltransferase (predicted)                                    | 0.95 | 1.32 | 1.59 |
| SPAC1486.02c | <i>ucp14</i> | UBA domain protein Ucp14                                           | UBA domain protein Ucp14                                                | 0.84 | 1.32 | 1.59 |
| SPAC23H3.02c | <i>ini1</i>  | RING finger-like protein Ini1                                      | RING finger-like protein Ini1                                           | 0.71 | 1.01 | 1.58 |
| SPCC663.15c  |              | conserved fungal protein                                           | conserved fungal protein                                                | 0.94 | 1.46 | 1.58 |
| SPAC2H10.01  |              | transcription factor, zf-fungal binuclear cluster type (predicted) | transcription factor                                                    | 0.55 | 1.28 | 1.58 |
| SPCC1020.12c |              | xap-5-like protein                                                 | xap-5-like protein                                                      | 0.90 | 1.49 | 1.58 |
| SPCC777.03c  |              | nifs homolog                                                       | nifs homolog                                                            | 0.72 | 0.95 | 1.58 |
| SPAPB24D3.03 |              | agmatinase (predicted)                                             | agmatinase (predicted)                                                  | 0.88 | 1.26 | 1.58 |
| SPCC1235.07  | <i>fta7</i>  | Sim4 and Mal2 associated (4 and 2 associated) protein 7            | Sim4 and Mal2 associated (4 and 2 associated) protein 7 (PMID 16079914) | 0.99 | 0.88 | 1.58 |
| SPBC8D2.03c  | <i>hhf2</i>  | histone H4 h4.2                                                    |                                                                         | 1.00 | 0.87 | 1.58 |
| SPAC17A2.05  | <i>osm1</i>  | fumerate reductase                                                 | fumerate reductase                                                      | 0.83 | 0.84 | 1.58 |

|               |               |                                                         |                                                        |      |      |      |
|---------------|---------------|---------------------------------------------------------|--------------------------------------------------------|------|------|------|
| SPBC56F2.01   | <i>pof12</i>  | F-box protein Pof12                                     |                                                        | 0.97 | 1.45 | 1.58 |
| SPBP35G2.09   | <i>usp103</i> | U1 snRNP-associated protein Usp103<br>(predicted)       |                                                        | 0.92 | 1.02 | 1.58 |
| SPCC23B6.04c  |               | sec14 cytosolic factor family                           | sec14 cytosolic factor family                          | 1.01 | 1.35 | 1.58 |
| SPAC25B8.11   |               | transcription factor (predicted)                        | transcription factor                                   | 0.97 | 1.46 | 1.58 |
| SPAC7D4.03c   |               | conserved fungal family                                 | conserved fungal family                                | 0.88 | 1.27 | 1.58 |
| SPBP23A10.12  |               | FRG1 family protein                                     |                                                        | 0.68 | 1.09 | 1.57 |
| SPAC589.11    | <i>mug82</i>  | mitochondrial translation release factor<br>(predicted) | translation release factor (predicted)                 | 0.75 | 1.13 | 1.57 |
| SPAC3C7.07c   |               | arginine-tRNA protein transferase<br>(predicted)        | arginine-tRNA protein transferase<br>(predicted)       | 0.99 | 1.49 | 1.57 |
| SPCC794.11c   |               | ENTH domain protein Ent3                                | ENTH domain protein Ent3                               | 0.99 | 1.32 | 1.57 |
| SPBC800.03    | <i>clr3</i>   | histone deacetylase (class II) Clr3                     | histone deacetylase (class II) Clr3                    | 1.01 | 1.39 | 1.57 |
| SPBC4C3.06    |               | actin cytoskeletal protein Syp1                         |                                                        | 0.97 | 1.37 | 1.57 |
| SPAC20H4.10   | <i>ufd2</i>   | ubiquitin-protein ligase E4 (predicted)                 | ubiquitin-protein ligase E4 (predicted)                | 0.98 | 1.49 | 1.57 |
| SPAC24H6.06   | <i>sld3</i>   | DNA replication pre-initiation complex<br>subunit Sld3  | pre-initiation complex subunit Sld3<br>(PMID 12006645) | 0.91 | 1.33 | 1.57 |
| SPAC29E6.10c  |               | kinetochore protein (predicted)                         | kinetochore protein (predicted)                        | 0.81 | 1.14 | 1.57 |
| SPCC895.04c   | <i>ufe1</i>   | SNARE Ufe1                                              | SNARE Ufe1                                             | 0.90 | 1.42 | 1.57 |
| SPBC3F6.05    | <i>rga1</i>   | GTPase activating protein Rga1                          |                                                        | 1.19 | 1.37 | 1.56 |
| SPAC22E12.19  |               | histone deacetylase complex subunit<br>(predicted)      | histone deacetylase complex subunit<br>(predicted)     | 0.93 | 0.89 | 1.56 |
| SPAC4F8.11    |               | WD repeat protein, human WDR24 family                   | WD repeat protein, human WDR24<br>family               | 0.82 | 1.43 | 1.56 |
| SPCC1827.08c  | <i>pof7</i>   | F-box protein Pof7                                      | F-box protein Pof7                                     | 0.79 | 1.28 | 1.56 |
| SPCC24B10.16c |               | sequence orphan                                         | sequence orphan                                        | 0.85 | 1.50 | 1.56 |
| SPAC664.07c   | <i>rad9</i>   | checkpoint clamp complex protein Rad9                   | checkpoint clamp complex protein Rad9                  | 1.19 | 1.27 | 1.56 |
| SPAC1002.18   | <i>urg3</i>   | DUF1688 family protein                                  | DUF1688 family protein                                 | 0.79 | 1.19 | 1.56 |
| SPBC1861.09   | <i>ppk22</i>  | serine/threonine protein kinase Ppk22<br>(predicted)    |                                                        | 0.83 | 1.21 | 1.56 |
| SPBC83.09c    |               | GYF domain                                              |                                                        | 0.81 | 1.10 | 1.56 |
| SPAC3G9.07c   | <i>hos2</i>   | histone deacetylase (class I) Hos2                      | histone deacetylase (class I) Hos2                     | 0.82 | 0.97 | 1.56 |
| SPCC576.05    |               | nuclear export factor                                   | nuclear export factor                                  | 0.77 | 1.26 | 1.56 |
| SPBC887.09c   |               | leucine-rich repeat protein Sog2<br>(predicted)         |                                                        | 0.94 | 1.26 | 1.56 |
| SPAC57A10.09c |               | High-mobility group non-histone chromatin<br>protein    | High-mobility group non-histone<br>chromatin protein   | 0.98 | 1.40 | 1.56 |

|               |               |                                                   |                                                   |      |      |      |
|---------------|---------------|---------------------------------------------------|---------------------------------------------------|------|------|------|
| SPAC110.02    | <i>pds5</i>   | cohesin-associated protein Pds5                   | cohesin-associated protein Pds5                   | 0.86 | 1.30 | 1.56 |
| SPBC1348.11   |               | membrane transporter                              | membrane transporter                              | 0.42 | 0.48 | 1.55 |
| SPCC4B3.04c   | <i>nte1</i>   | lysophospholipase                                 | lysophospholipase                                 | 0.99 | 1.30 | 1.55 |
| SPAC10F6.05c  | <i>ubc6</i>   | ubiquitin conjugating enzyme Ubc6                 | ubiquitin conjugating enzyme Ubc6                 | 0.88 | 1.22 | 1.55 |
| SPBC1215.01   | <i>shy1</i>   | SURF-family protein Shy1                          | SURF-family protein Shy1                          | 0.87 | 1.37 | 1.55 |
| SPAC22H10.11c |               |                                                   |                                                   | 0.92 | 1.27 | 1.55 |
| SPCC594.07c   |               | sequence orphan                                   | sequence orphan                                   | 0.97 | 1.30 | 1.54 |
| SPAC24H6.09   | <i>gef1</i>   | RhoGEF Gef1                                       | RhoGEF Gef1                                       | 0.90 | 1.16 | 1.54 |
| SPCC584.05    | <i>sec1</i>   | SNARE binding protein Sec1                        | SNARE binding protein Sec1                        | 0.83 | 1.40 | 1.54 |
| SPAC13C5.07   | <i>rad32</i>  | Rad32 nuclease                                    | Rad32 nuclease                                    | 0.96 | 1.13 | 1.54 |
| SPCC16C4.05   |               | RNase P and RNase MRP subunit (predicted)         | RNase P and RNase MRP subunit (predicted)         | 0.74 | 0.83 | 1.54 |
| SPCC1827.02c  |               | cholinephosphate cytidylyltransferase (predicted) | cholinephosphate cytidylyltransferase (predicted) | 1.01 | 1.30 | 1.54 |
| SPCC1235.03   |               | SMR and CUE domain protein                        | SMR and CUE domain protein                        | 0.65 | 1.31 | 1.54 |
| SPAC9G1.02    | <i>wis4</i>   | MAP kinase kinase kinase Wis4                     | MAP kinase kinase kinase Wis4                     | 0.77 | 1.23 | 1.53 |
| SPAC17H9.18c  |               | dubious                                           | dubious                                           | 0.81 | 0.76 | 1.53 |
| SPAC6G9.15c   |               | sequence orphan                                   | sequence orphan                                   | 0.76 | 1.06 | 1.53 |
| SPCC645.13    |               | transcription elongation regulator                | transcription elongation regulator                | 0.93 | 1.37 | 1.53 |
| SPAC2G11.12   | <i>rqh1</i>   | RecQ type DNA helicase Rqh1                       | RecQ type DNA helicase Rqh1                       | 0.92 | 1.34 | 1.53 |
| SPAC630.11    | <i>vps55</i>  | vacuolar sorting protein Vps55 (predicted)        | vacuolar sorting protein Vps55 (predicted)        | 0.85 | 1.24 | 1.52 |
| SPAC2F3.15    | <i>lsk1</i>   | latrunculin sensitive kinase Lsk1                 | latrunculin sensitive kinase Lsk1 (PMID 15537703) | 0.92 | 0.96 | 1.52 |
| SPCC162.08c   | <i>nup211</i> | nuclear pore complex associated protein           | nuclear pore complex associated protein           | 0.87 | 1.38 | 1.52 |
| SPCC1235.10c  | <i>sec6</i>   | exocyst complex subunit Sec6                      | exocyst complex subunit Sec6                      | 1.07 | 1.44 | 1.52 |
| SPBC1685.07c  |               | amino acid transporter (predicted)                | amino acid transporter (predicted)                | 0.89 | 1.44 | 1.52 |
| SPAC1002.02   | <i>mug31</i>  | nucleoporin Pom34 (predicted)                     | nucleoporin Pom34 (predicted)                     | 0.94 | 0.86 | 1.52 |
| SPCC1840.01c  | <i>mog1</i>   | Ran GTPase binding protein Mog1                   |                                                   | 0.78 | 1.48 | 1.52 |
| SPBC14F5.13c  |               | alkaline phosphatase (predicted)                  |                                                   | 0.95 | 1.31 | 1.52 |
| SPCC1442.17c  |               | DUF292 family protein                             | DUF292 family protein                             | 0.95 | 1.03 | 1.52 |
| SPAC20H4.06c  |               | RNA-binding protein                               | RNA-binding protein                               | 0.79 | 1.34 | 1.52 |
| SPBC530.11c   |               | transcription factor (predicted)                  |                                                   | 0.81 | 1.23 | 1.52 |
| SPAC1565.02c  |               | GTPase activating protein                         | GTPase activating protein                         | 0.86 | 1.47 | 1.52 |
| SPBC582.06c   | <i>mcp6</i>   | horsetail movement protein Hrs1/Mcp6              | meiosis specific coiled-coil protein Mcp6         | 1.01 | 0.86 | 1.52 |

|               |              |                                                            |                                                                |      |      |      |
|---------------|--------------|------------------------------------------------------------|----------------------------------------------------------------|------|------|------|
| SPAC1A6.01c   |              | human thyroid receptor interacting protein homolog         | human thyroid receptor interacting protein homolog             | 0.89 | 1.23 | 1.51 |
| SPBC2A9.02    |              | NAD dependent epimerase/dehydratase family protein         |                                                                | 0.95 | 1.19 | 1.51 |
| SPAP27G11.14c |              | sequence orphan                                            | sequence orphan                                                | 0.81 | 1.16 | 1.51 |
| SPCC830.05c   | <i>ep1</i>   | histone acetyltransferase complex subunit Epl1 (predicted) | histone acetyltransferase complex subunit Epl1 (predicted)     | 0.77 | 1.17 | 1.51 |
| SPCC553.01c   |              | meiotic chromosome segregation protein                     |                                                                | 0.86 | 1.29 | 1.51 |
| SPBC1734.07c  |              | TRAPP complex subunit Trs85 (predicted)                    |                                                                | 0.74 | 0.93 | 1.51 |
| SPCC1020.13c  |              | phospholipase (predicted)                                  | phospholipase (predicted)                                      | 0.96 | 1.29 | 1.51 |
| SPBC56F2.11   | <i>met6</i>  | homoserine O-acetyltransferase                             |                                                                | 0.88 | 1.22 | 1.51 |
| SPBC409.03    | <i>swi5</i>  | Swi5 protein                                               |                                                                | 0.75 | 1.02 | 1.51 |
| SPBC16A3.01   | <i>spn3</i>  | septin Spn3                                                |                                                                | 0.89 | 1.20 | 1.51 |
| SPBC530.14c   | <i>dsk1</i>  | SR protein-specific kinase Dsk1                            |                                                                | 0.91 | 1.06 | 1.51 |
| SPCC663.01c   | <i>ekc1</i>  | protein phosphatase regulatory subunit Ekc1 (predicted)    | protein phosphatase regulatory subunit Ekc1 (predicted)        | 1.03 | 1.44 | 1.51 |
| SPBC11C11.11c |              | mitochondrial ATP-dependent DNA helicase Irc3 (predicted)  |                                                                | 0.92 | 1.37 | 1.51 |
| SPBC3B9.15c   | <i>scp1</i>  | sterol regulatory element binding protein Scp1             |                                                                | 0.98 | 1.09 | 1.51 |
| SPAC1805.01c  | <i>ppk6</i>  | serine/threonine protein kinase Ppk6                       | serine/threonine protein kinase Ppk6                           | 0.89 | 1.08 | 1.50 |
| SPBC29A10.13  | <i>atp7</i>  | F0-ATPase subunit D                                        |                                                                | 0.83 | 1.41 | 1.50 |
| SPBC146.11c   | <i>mug97</i> | meiotically upregulated gene Mug97                         |                                                                | 0.66 | 0.96 | 1.50 |
| SPAC16C9.07   | <i>ppk5</i>  | serine/threonine protein kinase Ppk5 (predicted)           |                                                                | 0.87 | 1.43 | 1.50 |
| SPBC577.06c   |              | phosphatidylinositol kinase (predicted)                    |                                                                | 0.84 | 0.97 | 1.50 |
| SPAC31A2.11c  | <i>cuf1</i>  | Cu metalloregulatory transcription factor Cuf1             | Cu metalloregulatory transcription factor Cuf1 (PMID 10593913) | 0.92 | 1.24 | 1.50 |
| SPBP35G2.02   |              | DUF1000 family protein                                     |                                                                | 0.87 | 1.32 | 1.50 |
| SPBC2D10.14c  | <i>myo51</i> | myosin type V                                              |                                                                | 0.96 | 1.15 | 1.50 |
