# Supplementary material for: The Fission Yeast GATA Factor, Gaf1, Modulates Sexual Development via Direct Down-Regulation of ste11+ Expression in Response to Nitrogen Starvation
Source: PubMed Central journal article supplement (PMC3416868; doi:10.1371/journal.pone.0042409), 2012-08-10
Supplement: pone.0042409.s009.pdf [file pone.0042409.s009.pdf]

Table S9. List of the genes in Subgroup F

\* 6 genes

| Systematic   | Gene name    | Description (GeneDB)                                                         | Description (FunCat2)                                  | Expression Ratio          |                        |                              |
|--------------|--------------|------------------------------------------------------------------------------|--------------------------------------------------------|---------------------------|------------------------|------------------------------|
|              |              |                                                                              |                                                        | (gaf1Δ, +N)<br>/ (WT, +N) | (WT, -N)<br>/ (WT, +N) | (gaf1Δ, -N)<br>/ (gaf1Δ, +N) |
| SPAC1002.16c |              | nicotinic acid plasma membrane transporter (predicted)                       | nicotinic acid plasma membrane transporter (predicted) | 2.18                      | 1.33                   | 1.61                         |
| SPAC222F8.04 |              | triose phosphate transporter (predicted)                                     | triose phosphate transporter (predicted)               | 1.69                      | 1.10                   | 2.15                         |
| SPBC2G2.09c  | <i>crs1</i>  | meiosis specific cyclin Crs1                                                 |                                                        | 1.65                      | 1.19                   | 1.61                         |
| SPAC222.15   | <i>meu13</i> | Tat binding protein 1(TBP-1)-interacting protein (TBPIP) homolog (predicted) |                                                        | 1.64                      | 1.26                   | 1.59                         |
| SPBPJ4664.02 |              | glycoprotein (predicted)                                                     |                                                        | 1.64                      | 1.26                   | 1.83                         |
| SPAC27F1.10  |              | sequence orphan                                                              | sequence orphan                                        | 1.54                      | 1.31                   | 3.05                         |
