# Supplementary material for: The Fission Yeast GATA Factor, Gaf1, Modulates Sexual Development via Direct Down-Regulation of ste11+ Expression in Response to Nitrogen Starvation
Source: PubMed Central journal article supplement (PMC3416868; doi:10.1371/journal.pone.0042409), 2012-08-10
Supplement: pone.0042409.s010.pdf [file pone.0042409.s010.pdf]

Table S10. List of the genes in Subgroup G

\* 60 genes

| Systematic    | Gene name    | Description (GeneDB)                             | Description (FunCat2)                                      | Expression Ratio          |                        |                              |
|---------------|--------------|--------------------------------------------------|------------------------------------------------------------|---------------------------|------------------------|------------------------------|
|               |              |                                                  |                                                            | (gaf1Δ, +N)<br>/ (WT, +N) | (WT, -N)<br>/ (WT, +N) | (gaf1Δ, -N)<br>/ (gaf1Δ, +N) |
| SPAC13F5.07c  |              | term=sequence orphan; date=20080121              | previously annotated as dubious, may not be protein coding | 7.11                      | 16.28                  | 3.10                         |
| SPBCPT2R1.06c |              | pseudogene                                       |                                                            | 5.62                      | 10.23                  | 1.64                         |
| SPCC576.16c   | <i>wtf22</i> | wtf element Wtf22                                |                                                            | 5.33                      | 11.02                  | 2.94                         |
| SPBC23G7.10c  |              | NADH-dependent flavin oxidoreductase (predicted) |                                                            | 5.10                      | 7.97                   | 3.77                         |
| SPBC839.06    | <i>cta3</i>  | P-type ATPase, calcium transporting Cta3         | P-type ATPase, calcium transporting Cta3                   | 4.70                      | 3.39                   | 5.13                         |
| SPAC29E6.07   |              | sequence orphan                                  | sequence orphan                                            | 4.40                      | 2.60                   | 4.86                         |
| SPAPB17E12.09 |              | sequence orphan                                  | sequence orphan                                            | 4.15                      | 9.85                   | 2.15                         |
| SPAC1F8.01    | <i>ght3</i>  | hexose transporter Ght3                          | hexose transporter Ght3 (PMID 10735857)                    | 4.07                      | 93.52                  | 25.29                        |
| SPAC27D7.03c  | <i>mei2</i>  | RNA-binding protein involved in meiosis Mei2     | RNA-binding protein involved in meiosis Mei2               | 4.07                      | 43.74                  | 9.30                         |
| SPCC191.10    |              | sequence orphan                                  | sequence orphan                                            | 3.80                      | 59.80                  | 6.79                         |
| SPAC4F10.17   |              | conserved fungal protein                         | conserved fungal protein                                   | 3.74                      | 165.16                 | 5.84                         |
| SPBC1348.14c  | <i>ght7</i>  | hexose transporter Ght7                          | hexose transporter Ght7                                    | 2.81                      | 2.58                   | 10.19                        |
| SPBC887.16    |              | dubious                                          |                                                            | 2.80                      | 2.90                   | 2.89                         |
| SPBC1198.12   | <i>mfr1</i>  | fizzy-related protein Mfr1                       |                                                            | 2.79                      | 3.64                   | 1.81                         |
| SPBC32H8.06   | <i>mug93</i> | TPR repeat protein, meiotically spliced          |                                                            | 2.64                      | 3.86                   | 3.56                         |
| SPAC186.02c   |              | hydroxyacid dehydrogenase (predicted)            | hydroxyacid dehydrogenase (predicted)                      | 2.59                      | 1.70                   | 1.59                         |
| SPAC9E9.17c   |              | dubious                                          | dubious                                                    | 2.50                      | 2.75                   | 4.30                         |
| SPAC1039.09   | <i>isp5</i>  | amino acid permease Isp5                         | amino acid permease Isp5                                   | 2.37                      | 33.67                  | 3.77                         |
| SPAC17A5.11   | <i>rec12</i> | endonuclease Rec12                               | endonuclease Rec12                                         | 2.35                      | 2.69                   | 1.70                         |
| SPCC622.21    | <i>wtf12</i> | wtf element Wtf12                                | wtf element Wtf12                                          | 2.34                      | 2.58                   | 1.93                         |
| SPAC32A11.01  | <i>mug8</i>  | conserved fungal protein                         | conserved fungal protein                                   | 2.27                      | 5.82                   | 4.25                         |
| SPAC1F8.04c   |              | hydrolase (predicted)                            | hydrolase (predicted)                                      | 2.21                      | 107.88                 | 13.74                        |
| SPAC212.07c   |              | pseudogene                                       | pseudogene                                                 | 2.21                      | 5.24                   | 2.91                         |
| SPCC548.02c   | <i>wtf3</i>  | wtf element Wtf3                                 | wtf element Wtf3                                           | 2.19                      | 7.50                   | 3.30                         |

|              |               |                                                                     |                                                                     |      |         |        |
|--------------|---------------|---------------------------------------------------------------------|---------------------------------------------------------------------|------|---------|--------|
| SPAC22F8.02c | <i>pvg5</i>   | PvGal biosynthesis protein Pvg5                                     | PvGal biosynthesis protein Pvg5                                     | 2.17 | 1.94    | 2.41   |
| SPAC6G10.06  |               | FAD-dependent amino acid oxidase (predicted)                        | amino acid oxidase (predicted)                                      | 2.16 | 12.04   | 4.60   |
| SPAC4G9.07   | <i>mug133</i> | S. pombe specific UPF0300 family protein 2                          | S. pombe specific UPF0300 family protein 2                          | 2.16 | 4.37    | 2.80   |
| SPCC1223.02  | <i>nmt1</i>   | no message in thiamine Nmt1                                         | no message in thiamine Nmt1                                         | 2.14 | 1118.03 | 705.95 |
| SPBC23G7.11  |               | DNA-3-methyladenine glycosidase Mag2 (predicted)                    |                                                                     | 2.01 | 5.98    | 4.51   |
| SPAC1952.15c | <i>rec24</i>  | meiotic recombination protein Rec24                                 | meiotic recombination protein Rec24                                 | 2.00 | 11.82   | 5.57   |
| SPAC31G5.09c | <i>spk1</i>   | MAP kinase Spk1                                                     | MAP kinase Spk1                                                     | 1.95 | 36.46   | 23.90  |
| SPCC1183.10  | <i>wtf10</i>  | wtf element Wtf10                                                   | wtf element Wtf10                                                   | 1.94 | 3.38    | 1.90   |
| SPAC750.07c  |               | S. pombe specific GPI anchored protein family 1                     | S. pombe specific GPI anchored protein family 1                     | 1.93 | 2.35    | 3.77   |
| SPCC1840.12  |               | OPT oligopeptide transporter family amino acid permease, unknown 13 | OPT oligopeptide transporter family amino acid permease, unknown 13 | 1.91 | 8.80    | 1.76   |
| SPCC794.03   |               | sequence orphan                                                     | sequence orphan                                                     | 1.89 | 9.58    | 2.44   |
| SPAC17A2.11  |               | RNA-binding protein, rrm type                                       | RNA-binding protein                                                 | 1.82 | 2.69    | 4.90   |
| SPCC74.09    | <i>mug24</i>  | transcription factor Ste11                                          |                                                                     | 1.76 | 5.87    | 3.10   |
| SPBC32C12.02 | <i>ste11</i>  | beta-glucosidase Psu2 (predicted)                                   |                                                                     | 1.74 | 2.64    | 2.71   |
| SPBC2G2.17c  |               | adducin                                                             | adducin                                                             | 1.73 | 82.76   | 45.98  |
| SPBC359.06   | <i>mug14</i>  | MADS-box transcription factor Map1                                  | MADS-box transcription factor Map1                                  | 1.72 | 11.77   | 6.14   |
| SPAC11E3.06  | <i>map1</i>   | ubiquitin C-terminal hydrolase Ubp11                                | ubiquitin C-terminal hydrolase Ubp11                                | 1.72 | 5.07    | 3.84   |
| SPBC19C2.04c | <i>ubp11</i>  | G-protein alpha subunit                                             |                                                                     | 1.70 | 11.54   | 7.32   |
| SPBC24C6.06  | <i>gpa1</i>   | adaptor protein Ste4                                                | adaptor protein Ste4                                                | 1.69 | 10.87   | 5.41   |
| SPAC1565.04c | <i>ste4</i>   | GFO/IDH/MocA family oxidoreductase                                  | GFO/IDH/MocA family oxidoreductase                                  | 1.66 | 2.83    | 2.06   |
| SPAC26H5.09c |               | ammonium transporter Amt1                                           | ammonium transporter Amt1                                           | 1.63 | 3.81    | 2.06   |
| SPCPB1C11.01 | <i>amt1</i>   | pheromone M-factor receptor                                         | pheromone M-factor receptor (PMID 8380233)                          | 1.63 | 6.53    | 7.13   |
| SPAC3F10.10c | <i>map3</i>   | amino acid permease, unknown 11                                     |                                                                     | 1.62 | 1.69    | 2.78   |
| SPBC19F8.06c | <i>meu22</i>  | conserved fungal protein                                            | conserved fungal protein                                            | 1.61 | 3.78    | 1.93   |
| SPBC660.06   |               | pseudogene                                                          | pseudogene                                                          | 1.61 | 3.91    | 2.96   |
| SPBPB21E7.08 |               | membrane transporter (predicted)                                    | purine permease (predicted)                                         | 1.56 | 16.03   | 6.74   |
| SPAC1399.01c |               | wtf element Wtf13                                                   | wtf element Wtf13                                                   | 1.55 | 2.89    | 2.39   |
| SPCC162.04c  | <i>wtf13</i>  | sequence orphan                                                     | sequence orphan                                                     | 1.55 | 33.50   | 26.64  |
| SPAC1F8.05   | <i>isp3</i>   | P-type ATPase, calcium transporting Pmc1                            | P-type ATPase, calcium transporting Pmc1 (PMID 12707717)            | 1.54 | 3.75    | 2.29   |
| SPAPB2B4.04c |               | serine/threonine protein kinase Ppk33 (predicted)                   | serine/threonine protein kinase Ppk33 (predicted)                   | 1.53 | 46.35   | 30.03  |
| SPCC162.10   | <i>ppk33</i>  |                                                                     |                                                                     |      |         |        |

|              |             |                                      |                                      |      |        |       |
|--------------|-------------|--------------------------------------|--------------------------------------|------|--------|-------|
| SPAPB8E5.05  | <i>mfm1</i> | M-factor precursor Mfm1              | M-factor precursor Mfm1              | 1.53 | 55.56  | 37.23 |
| SPCPB1C11.02 |             | amino acid permease, unknown 16      | amino acid permease, unknown 16      | 1.51 | 3.50   | 4.50  |
| SPCC1795.06  | <i>map2</i> | P-factor                             | P-factor (PMID 8314086)              | 1.50 | 101.73 | 66.21 |
| SPCC4G3.08   | <i>psk1</i> | serine/threonine protein kinase Psk1 | serine/threonine protein kinase Psk1 | 1.50 | 2.46   | 2.36  |
| SPAC513.04   |             | sequence orphan                      | sequence orphan                      | 1.50 | 1.50   | 8.96  |

---
